# Supplementary material for: Automated Metabolite Formula Ranking Using Formula Subset Analysis for LC-MS/MS-Based Metabolomics
Source: Research Square preprint supplement (doi:10.21203/rs.3.rs-7764688/v1), 2025-10-17
Supplement: Supplementary file 1 [file e29e693aa09a740ba0c7e0ea.xlsx]

## Sheet: HMDB_QTOF_result
No	Name	Instrument_Type	Ionization_Mode	Mass	Formula	Rank_Reduced	Original_Rank	Original_Candidates	Peak_Num	Frag_Num	Frag_w_Formula	Score	Is_Reduced	Is_Top1_Uniq	Char_Frag_Percent	Is_CFP_Max	Is_CFP_Max_Uniq	Top2_Sore_Diff	Peak_Dist_SD	Comp_Time	Note
1	Deoxycytidine	LC-ESI-QTOF (UPLC Q-Tof Premier; Waters)	positive	227.091	C9H13N3O4	1	2	3	3	3	1	1.33333	0	0	0.333333	1	0	0	74.9781	0.0256431	successful ranked
2	Deoxycytidine	LC-ESI-QTOF (UPLC Q-Tof Premier; Waters)	negative	227.091	C9H13N3O4	1	2	3	6	5	1	1.1	0	0	0.2	1	0	0	28.6205	0.0112709	successful ranked
3	Deoxycytidine	LC-ESI-QTOF	negative	227.091	C9H13N3O4	1	2	3	6	5	1	1.1	0	0	0.2	1	0	0	28.6205	0.0038902	successful ranked
4	Deoxycytidine	LC-ESI-QTOF	positive	227.091	C9H13N3O4	1	2	3	3	3	1	1.33333	0	0	0.333333	1	0	0	74.9781	0.0009884	successful ranked
5	Cortexolone	LC-ESI-qTof	positive	346.214	C21H30O4	2	2	4	814	30	16	1.23647	0	1	0.592593	1	1	0.00569801	0.819334	0.0136742	successful ranked
6	Deoxycorticosterone	LC-ESI-qTof	positive	330.219	C21H30O3	3	3	4	1000	30	7	1.09788	0	1	0.25	0	1	0.015873	0.810056	0.0034799	successful ranked
7	4-Pyridoxic acid	LC-ESI-QTOF (UPLC Q-Tof Premier; Waters)	positive	183.053	C8H9NO4	2	2	2	7	7	3	1.93333	0	1	0.5	0	1	0.533333	6.71001	0.0020133	successful ranked
8	4-Pyridoxic acid	LC-ESI-QTOF (UPLC Q-Tof Premier; Waters)	positive	183.053	C8H9NO4	1	1	2	6	7	6	1.71429	0	1	0.857143	1	1	0.333333	12.4167	0.0015755	successful ranked
9	4-Pyridoxic acid	LC-ESI-QTOF (UPLC Q-Tof Premier; Waters)	negative	183.053	C8H9NO4	1	1	2	3	3	2	2	0	1	0.666667	1	1	1	22.4761	0.0043587	successful ranked
10	4-Pyridoxic acid	LC-ESI-QTOF	negative	183.053	C8H9NO4	1	1	2	3	3	2	2	0	1	0.666667	1	1	1	22.4761	0.0002144	successful ranked
11	4-Pyridoxic acid	LC-ESI-QTOF	positive	183.053	C8H9NO4	2	2	2	7	7	3	1.93333	0	1	0.5	0	1	0.533333	6.71001	0.000236	successful ranked
12	4-Pyridoxic acid	LC-ESI-QTOF	positive	183.053	C8H9NO4	1	1	2	6	7	6	1.71429	0	1	0.857143	1	1	0.333333	12.4167	0.0002254	successful ranked
13	Biotin	LC-ESI-qTof	positive	244.088	C10H16N2O3S	1	1	5	228	31	12	1.09402	0	1	0.444444	1	1	0.0712251	1.65012	0.0046097	successful ranked
14	Biotin	LC-ESI-QTOF	negative	244.088	C10H16N2O3S	1	1	5	6	4	3	1.83333	0	1	0.75	1	1	0.666667	14.4168	0.005328	successful ranked
15	Biotin	LC-ESI-QTOF	negative	244.088	C10H16N2O3S	1	1	5	14	12	9	1.37879	0	1	0.75	1	1	0.30303	14.2106	0.0025546	successful ranked
16	Biotin	LC-ESI-QTOF	positive	244.088	C10H16N2O3S	1	3	5	6	4	1	1.16667	0	0	0.25	1	0	0	7.68861	0.0020219	successful ranked
17	Biotin	LC-ESI-QTOF	positive	244.088	C10H16N2O3S	1	1	5	9	9	6	1.5	0	1	0.666667	1	1	0.472222	7.94348	0.0014484	successful ranked
18	Biotin	LC-ESI-QTOF	positive	244.088	C10H16N2O3S	1	1	5	53	30	26	1.46437	0	1	0.866667	1	1	0.43908	3.61725	0.0032266	successful ranked
19	Biotin	LC-ESI-QTOF	positive	244.088	C10H16N2O3S	1	1	5	72	31	30	1.56344	0	1	0.967742	1	1	0.511828	3.41976	0.0009085	successful ranked
20	Biotin	LC-ESI-QTOF	positive	244.088	C10H16N2O3S	1	1	5	26	27	24	1.2849	1	1	0.888889	1	1	0.139601	18.1221	0.0016859	successful ranked
21	Carnosine	LC-ESI-QTOF (UPLC Q-Tof Premier; Waters)	positive	226.107	C9H14N4O3	1	2	2	4	4	1	1.16667	0	0	0.25	1	0	0	19.462	0.0001691	successful ranked
22	Carnosine	LC-ESI-QTOF (UPLC Q-Tof Premier; Waters)	positive	226.107	C9H14N4O3	1	1	2	10	10	5	1.24444	1	1	0.5	1	1	0.177778	10.0459	0.0003219	successful ranked
23	Carnosine	LC-ESI-QTOF (UPLC Q-Tof Premier; Waters)	negative	226.107	C9H14N4O3	1	1	2	7	6	2	1.2	1	1	0.333333	1	1	0.133333	23.5235	0.0007262	successful ranked
24	Carnosine	LC-ESI-QTOF	negative	226.107	C9H14N4O3	1	1	2	7	6	2	1.2	1	1	0.333333	1	1	0.133333	23.5235	0.0001798	successful ranked
25	Carnosine	LC-ESI-QTOF	positive	226.107	C9H14N4O3	1	2	2	4	4	1	1.16667	0	0	0.25	1	0	0	19.462	0.0001412	successful ranked
26	Carnosine	LC-ESI-QTOF	positive	226.107	C9H14N4O3	1	1	2	10	10	5	1.24444	1	1	0.5	1	1	0.177778	10.0459	0.0004672	successful ranked
27	Adenine	LC-ESI-QTOF (UPLC Q-Tof Premier; Waters)	negative	135.054	C5H5N5	1	1	1	3	3	-1	0.999999	-1	-1	-1	-1	-1	-1	13.5331	-1	Single candidate matches with the answer.
28	Adenine	LC-ESI-QTOF (UPLC Q-Tof Premier; Waters)	negative	135.054	C5H5N5	1	1	1	8	8	-1	0.999999	-1	-1	-1	-1	-1	-1	10.7639	-1	Single candidate matches with the answer.
29	Adenine	LC-ESI-QTOF	negative	135.054	C5H5N5	1	1	1	3	3	-1	0.999999	-1	-1	-1	-1	-1	-1	13.5331	-1	Single candidate matches with the answer.
30	Adenine	LC-ESI-QTOF	negative	135.054	C5H5N5	1	1	1	8	8	-1	0.999999	-1	-1	-1	-1	-1	-1	10.7639	-1	Single candidate matches with the answer.
31	Betaine	LC-ESI-QTOF (UPLC Q-Tof Premier; Waters)	positive	117.079	C5H11NO2	1	1	1	3	3	-1	0.999999	-1	-1	-1	-1	-1	-1	41.0144	-1	Single candidate matches with the answer.
32	Betaine	LC-ESI-QTOF (UPLC Q-Tof Premier; Waters)	positive	117.079	C5H11NO2	1	1	1	3	3	-1	0.999999	-1	-1	-1	-1	-1	-1	41.0149	-1	Single candidate matches with the answer.
33	Betaine	LC-ESI-QTOF	positive	117.079	C5H11NO2	1	1	1	3	3	-1	0.999999	-1	-1	-1	-1	-1	-1	41.0144	-1	Single candidate matches with the answer.
34	Betaine	LC-ESI-QTOF	positive	117.079	C5H11NO2	1	1	1	3	3	-1	0.999999	-1	-1	-1	-1	-1	-1	41.0149	-1	Single candidate matches with the answer.
35	Adenosine monophosphate	LC-ESI-QTOF (UPLC Q-Tof Premier; Waters)	negative	347.063	C10H14N5O7P	1	1	7	4	4	2	1.5	1	1	0.5	1	1	0.333333	97.9992	0.0014672	successful ranked
36	Adenosine monophosphate	LC-ESI-QTOF	negative	347.063	C10H14N5O7P	1	1	7	4	4	2	1.5	1	1	0.5	1	1	0.333333	97.9992	0.0003803	successful ranked
37	Adenosine	LC-ESI-QTOF (UPLC Q-Tof Premier; Waters)	negative	267.097	C10H13N5O4	1	1	4	3	3	0	0.999998	-1	0	-1	-1	-1	-1	69.757	0.0014253	No mother-daughter relation is found for all the precursor formula.
38	Adenosine	LC-ESI-QTOF (UPLC Q-Tof Premier; Waters)	positive	267.097	C10H13N5O4	1	1	4	3	3	0	0.999998	-1	0	-1	-1	-1	-1	81.3285	0.000173	No mother-daughter relation is found for all the precursor formula.
39	Adenosine	LC-ESI-QTOF	negative	267.097	C10H13N5O4	1	1	4	3	3	0	0.999998	-1	0	-1	-1	-1	-1	69.757	0.000154	No mother-daughter relation is found for all the precursor formula.
40	Adenosine	LC-ESI-QTOF	positive	267.097	C10H13N5O4	2	4	4	5	3	0	1.33333	1	0	0	0	1	0.333333	75.3678	0.0001918	successful ranked
41	Adenosine	LC-ESI-QTOF	positive	267.097	C10H13N5O4	2	4	4	3	3	0	1.33333	1	0	0	0	1	0.333333	75.3683	0.0001852	successful ranked
42	Adenosine	LC-ESI-QTOF	positive	267.097	C10H13N5O4	2	4	4	3	4	0	1.16667	1	0	0	0	1	0.166667	70.906	0.000184	successful ranked
43	Adenosine	LC-ESI-QTOF	positive	267.097	C10H13N5O4	2	3	4	5	6	1	1.1	1	0	0.2	1	0	0	54.7619	0.0008577	successful ranked
44	Adenosine	LC-ESI-QTOF	positive	267.097	C10H13N5O4	2	4	4	6	3	0	1.33333	1	0	0	0	1	0.333333	62.999	0.0001877	successful ranked
45	Adenosine	LC-ESI-QTOF	positive	267.097	C10H13N5O4	2	4	4	6	4	0	1.16667	1	0	0	0	1	0.166667	56.4738	0.0001867	successful ranked
46	Adenosine	LC-ESI-QTOF	positive	267.097	C10H13N5O4	2	4	4	5	4	0	1.16667	1	0	0	0	1	0.166667	56.9767	0.0002003	successful ranked
47	Adenosine	LC-ESI-QTOF	positive	267.097	C10H13N5O4	1	1	4	3	3	0	0.999998	-1	0	-1	-1	-1	-1	81.3285	0.0001548	No mother-daughter relation is found for all the precursor formula.
48	beta-Alanine	LC-ESI-QTOF (UPLC Q-Tof Premier; Waters)	positive	89.0477	C3H7NO2	1	1	1	3	1	-1	1.41964	-1	-1	-1	-1	-1	-1	0	-1	Single candidate matches with the answer.
49	beta-Alanine	LC-ESI-QTOF	positive	89.0477	C3H7NO2	1	1	1	3	1	-1	1.41964	-1	-1	-1	-1	-1	-1	0	-1	Single candidate matches with the answer.
50	Cyclic AMP	LC-ESI-QTOF (UPLC Q-Tof Premier; Waters)	positive	329.053	C10H12N5O6P	4	7	7	3	2	0	2	1	0	0	0	0	0	136.938	0.0096874	successful ranked
51	Cyclic AMP	LC-ESI-QTOF (UPLC Q-Tof Premier; Waters)	positive	329.053	C10H12N5O6P	1	3	7	4	2	1	2	0	0	0.5	1	0	0	111.852	0.0012841	successful ranked
52	Cyclic AMP	LC-ESI-QTOF (UPLC Q-Tof Premier; Waters)	negative	329.053	C10H12N5O6P	3	4	7	4	4	1	1.33333	0	0	0.25	0	0	0	96.0897	0.0027398	successful ranked
53	Cyclic AMP	LC-ESI-QTOF	negative	329.053	C10H12N5O6P	3	4	7	4	4	1	1.33333	0	0	0.25	0	0	0	96.0897	0.0004422	successful ranked
54	Cyclic AMP	LC-ESI-QTOF	positive	329.053	C10H12N5O6P	4	7	7	3	2	0	2	1	0	0	0	0	0	136.938	0.0003084	successful ranked
55	Cyclic AMP	LC-ESI-QTOF	positive	329.053	C10H12N5O6P	1	3	7	4	2	1	2	0	0	0.5	1	0	0	111.852	0.0002728	successful ranked
56	L-Carnitine	LC-ESI-QTOF	positive	161.105	C7H15NO3	1	1	1	5	5	-1	0.999998	-1	-1	-1	-1	-1	-1	24.5041	-1	Single candidate matches with the answer.
57	L-Carnitine	LC-ESI-QTOF	positive	161.105	C7H15NO3	1	1	1	9	9	-1	0.999998	-1	-1	-1	-1	-1	-1	20.6374	-1	Single candidate matches with the answer.
58	L-Carnitine	LC-ESI-QTOF	positive	161.105	C7H15NO3	1	1	1	5	5	-1	0.999998	-1	-1	-1	-1	-1	-1	24.504	-1	Single candidate matches with the answer.
59	Cortisol	LC-ESI-qTof	positive	362.209	C21H30O5	1	1	4	485	30	20	1.37241	0	1	0.666667	1	1	0.0505747	1.03709	0.0010582	successful ranked
60	Cortisol	LC-ESI-qTof	positive	362.209	C21H30O5	1	1	4	1000	31	17	1.24631	0	1	0.586207	1	0	0.00246305	0.81095	0.0010771	successful ranked
61	Pipecolic acid	LC-ESI-QTOF (UPLC Q-Tof Premier; Waters)	positive	129.079	C6H11NO2	1	1	1	12	12	-1	0.999999	-1	-1	-1	-1	-1	-1	13.4724	-1	Single candidate matches with the answer.
62	Pipecolic acid	LC-ESI-QTOF	positive	129.079	C6H11NO2	1	1	1	12	12	-1	0.999999	-1	-1	-1	-1	-1	-1	13.4724	-1	Single candidate matches with the answer.
63	cis-Aconitic acid	LC-ESI-QTOF (UPLC Q-Tof Premier; Waters)	negative	174.016	C6H6O6	1	1	2	4	4	2	1.33333	0	1	0.5	1	1	0.333333	18.2513	0.0001848	successful ranked
64	cis-Aconitic acid	LC-ESI-QTOF	negative	174.016	C6H6O6	1	1	2	4	4	2	1.33333	0	1	0.5	1	1	0.333333	18.2513	0.0001415	successful ranked
65	Dopamine	LC-ESI-QTOF	positive	153.079	C8H11NO2	1	1	2	4	5	3	1.6	0	1	0.6	1	1	0.3	3.87649	0.0006269	successful ranked
66	Dopamine	LC-ESI-QTOF	positive	153.079	C8H11NO2	1	1	2	8	9	8	1.83333	0	1	0.888889	1	1	0.472222	6.06675	0.0002976	successful ranked
67	Dopamine	LC-ESI-QTOF	positive	153.079	C8H11NO2	1	1	2	11	11	8	1.68889	0	1	0.8	1	1	0.288889	7.65704	0.0003162	successful ranked
68	Dopamine	LC-ESI-QTOF	positive	153.079	C8H11NO2	1	1	2	16	14	10	1.64103	0	1	0.769231	1	1	0.346154	10.798	0.0003522	successful ranked
69	Dihydrouracil	LC-ESI-QTOF (UPLC Q-Tof Premier; Waters)	positive	114.043	C4H6N2O2	1	1	1	9	9	-1	0.999999	-1	-1	-1	-1	-1	-1	6.7286	-1	Single candidate matches with the answer.
70	Dihydrouracil	LC-ESI-QTOF	positive	114.043	C4H6N2O2	1	1	1	9	9	-1	0.999999	-1	-1	-1	-1	-1	-1	6.7286	-1	Single candidate matches with the answer.
71	Dehydroepiandrosterone	LC-ESI-qTof	positive	288.209	C19H28O2	2	2	3	1000	40	6	1.04545	0	1	0.181818	0	1	0.0189394	0.609878	0.0007356	successful ranked
72	Cysteinylglycine	LC-ESI-QTOF	positive	178.041	C5H10N2O3S	1	1	5	8	8	4	1.66667	0	1	0.666667	1	1	0.666667	5.22044	0.0015696	successful ranked
73	Citric acid	LC-ESI-QTOF (UPLC Q-Tof Premier; Waters)	negative	192.027	C6H8O7	1	1	3	14	13	5	1.42857	0	1	0.714286	1	1	0.333333	7.86847	0.0005703	successful ranked
74	Citric acid	LC-ESI-QTOF	negative	192.027	C6H8O7	1	1	3	14	13	5	1.42857	0	1	0.714286	1	1	0.333333	7.86847	0.0003053	successful ranked
75	Cytidine monophosphate	LC-ESI-QTOF (UPLC Q-Tof Premier; Waters)	positive	323.052	C9H14N3O8P	5	8	8	4	4	0	1.66667	1	0	0	0	0	0	117.668	0.0027678	successful ranked
76	Cytidine monophosphate	LC-ESI-QTOF (UPLC Q-Tof Premier; Waters)	negative	323.052	C9H14N3O8P	1	1	8	4	4	3	2	0	1	0.75	1	1	0.5	83.3249	0.0004659	successful ranked
77	Cytidine monophosphate	LC-ESI-QTOF (UPLC Q-Tof Premier; Waters)	negative	323.052	C9H14N3O8P	1	1	8	4	4	3	2	0	1	0.75	1	1	0.5	83.3246	0.000414	successful ranked
78	Cytidine monophosphate	LC-ESI-QTOF	negative	323.052	C9H14N3O8P	1	1	8	4	4	3	2	0	1	0.75	1	1	0.5	83.3249	0.0004089	successful ranked
79	Cytidine monophosphate	LC-ESI-QTOF	negative	323.052	C9H14N3O8P	1	1	8	4	4	3	2	0	1	0.75	1	1	0.5	83.3246	0.0004198	successful ranked
80	Cytidine monophosphate	LC-ESI-QTOF	positive	323.052	C9H14N3O8P	5	8	8	4	4	0	1.66667	1	0	0	0	0	0	117.668	0.0005311	successful ranked
81	Choline	LC-ESI-QTOF (UPLC Q-Tof Premier; Waters)	positive	104.108	C5H14NO	1	1	1	3	3	-1	0.999999	-1	-1	-1	-1	-1	-1	24.5509	-1	Single candidate matches with the answer.
82	Choline	LC-ESI-QTOF	positive	104.108	C5H14NO	1	1	1	3	3	-1	0.999999	-1	-1	-1	-1	-1	-1	24.5509	-1	Single candidate matches with the answer.
83	L-Cystathionine	LC-ESI-QTOF (UPLC Q-Tof Premier; Waters)	positive	222.067	C7H14N2O4S	3	4	7	4	3	1	2	0	0	0.333333	0	1	0.666667	38.3506	0.0004074	successful ranked
84	L-Cystathionine	LC-ESI-QTOF (UPLC Q-Tof Premier; Waters)	positive	222.067	C7H14N2O4S	6	7	7	5	5	1	1.6	0	0	0.2	0	0	0.2	20.9591	0.0015233	successful ranked
85	L-Cystathionine	LC-ESI-QTOF (UPLC Q-Tof Premier; Waters)	negative	222.067	C7H14N2O4S	1	1	7	4	3	2	2	0	1	0.666667	1	1	1	41.5681	0.0008344	successful ranked
86	L-Cystathionine	LC-ESI-QTOF	negative	222.067	C7H14N2O4S	1	1	7	4	3	2	2	0	1	0.666667	1	1	1	41.5681	0.0003057	successful ranked
87	L-Cystathionine	LC-ESI-QTOF	positive	222.067	C7H14N2O4S	3	4	7	4	3	1	2	0	0	0.333333	0	1	0.666667	38.3506	0.0003899	successful ranked
88	L-Cystathionine	LC-ESI-QTOF	positive	222.067	C7H14N2O4S	6	7	7	5	5	1	1.6	0	0	0.2	0	0	0.2	20.9591	0.000524	successful ranked
89	Deoxyadenosine	LC-ESI-QTOF (UPLC Q-Tof Premier; Waters)	positive	251.102	C10H13N5O3	2	3	3	3	3	1	1.66667	0	0	0.333333	0	1	0.333333	68.615	0.0009935	successful ranked
90	Deoxyadenosine	LC-ESI-QTOF	positive	251.102	C10H13N5O3	2	3	3	3	3	1	1.66667	0	0	0.333333	0	1	0.333333	68.615	0.0001782	successful ranked
91	gamma-Aminobutyric acid	LC-ESI-QTOF (UPLC Q-Tof Premier; Waters)	positive	103.063	C4H9NO2	1	1	1	4	4	-1	0.999999	-1	-1	-1	-1	-1	-1	9.26171	-1	Single candidate matches with the answer.
92	gamma-Aminobutyric acid	LC-ESI-QTOF	positive	103.063	C4H9NO2	1	1	1	4	4	-1	0.999999	-1	-1	-1	-1	-1	-1	9.26171	-1	Single candidate matches with the answer.
93	Folic acid	LC-ESI-QTOF (UPLC Q-Tof Premier; Waters)	negative	441.14	C19H19N7O6	9	11	11	8	8	0	1.7	1	0	0	0	1	0.2	41.3633	0.0022721	successful ranked
94	Folic acid	LC-ESI-qTof	positive	441.14	C19H19N7O6	4	6	11	305	30	7	1.17368	1	0	0.35	0	1	0.0789474	4.15826	0.004637	successful ranked
95	Folic acid	LC-ESI-QTOF	negative	441.14	C19H19N7O6	9	11	11	8	8	0	1.7	1	0	0	0	1	0.2	41.3633	0.000903	successful ranked
96	Guanidoacetic acid	LC-ESI-QTOF (UPLC Q-Tof Premier; Waters)	positive	117.054	C3H7N3O2	1	1	1	5	5	-1	0.999999	-1	-1	-1	-1	-1	-1	11.482	-1	Single candidate matches with the answer.
97	Guanidoacetic acid	LC-ESI-QTOF (UPLC Q-Tof Premier; Waters)	negative	117.054	C3H7N3O2	1	1	1	3	2	-1	0.999999	-1	-1	-1	-1	-1	-1	24.1521	-1	Single candidate matches with the answer.
98	Guanidoacetic acid	LC-ESI-QTOF	negative	117.054	C3H7N3O2	1	1	1	3	2	-1	0.999999	-1	-1	-1	-1	-1	-1	24.1521	-1	Single candidate matches with the answer.
99	Guanidoacetic acid	LC-ESI-QTOF	positive	117.054	C3H7N3O2	1	1	1	5	5	-1	0.999999	-1	-1	-1	-1	-1	-1	11.482	-1	Single candidate matches with the answer.
100	Homogentisic acid	LC-ESI-QTOF (UPLC Q-Tof Premier; Waters)	negative	168.042	C8H8O4	1	2	2	4	4	3	2	0	0	0.75	1	0	0	20.5095	0.0001643	successful ranked
101	Homogentisic acid	LC-ESI-QTOF	negative	168.042	C8H8O4	1	2	2	4	4	3	2	0	0	0.75	1	0	0	20.5095	0.0001563	successful ranked
102	Guanine	LC-ESI-QTOF (UPLC Q-Tof Premier; Waters)	positive	151.049	C5H5N5O	1	1	2	3	3	0	0.999999	-1	0	-1	-1	-1	-1	0.00925306	0.0019763	No mother-daughter relation is found for all the precursor formula.
103	Guanine	LC-ESI-QTOF (UPLC Q-Tof Premier; Waters)	negative	151.049	C5H5N5O	1	1	2	4	4	2	1.33333	1	1	0.5	1	1	0.166667	17.4561	0.0001642	successful ranked
104	Guanine	LC-ESI-QTOF	negative	151.049	C5H5N5O	1	1	2	4	4	2	1.33333	1	1	0.5	1	1	0.166667	17.4561	0.0001389	successful ranked
105	Guanine	LC-ESI-QTOF	positive	151.049	C5H5N5O	1	1	2	3	3	0	0.999999	-1	0	-1	-1	-1	-1	0.00925306	0.0001149	No mother-daughter relation is found for all the precursor formula.
106	Guanosine	LC-ESI-QTOF (UPLC Q-Tof Premier; Waters)	positive	283.092	C10H13N5O5	1	1	5	3	2	1	2	0	1	0.5	1	1	1	93.2023	0.0002174	successful ranked
107	Guanosine	LC-ESI-QTOF (UPLC Q-Tof Premier; Waters)	positive	283.092	C10H13N5O5	2	5	5	4	2	0	2	0	0	0	0	1	1	76.1407	0.0003597	successful ranked
108	Guanosine	LC-ESI-QTOF (UPLC Q-Tof Premier; Waters)	negative	283.092	C10H13N5O5	3	4	5	4	4	1	1.5	1	0	0.25	0	0	0	59.9312	0.0007389	successful ranked
109	Guanosine	LC-ESI-QTOF	negative	283.092	C10H13N5O5	3	4	5	4	4	1	1.5	1	0	0.25	0	0	0	59.9312	0.0003153	successful ranked
110	Guanosine	LC-ESI-QTOF	positive	283.092	C10H13N5O5	1	1	5	3	2	1	2	0	1	0.5	1	1	1	93.2023	0.0001939	successful ranked
111	Guanosine	LC-ESI-QTOF	positive	283.092	C10H13N5O5	2	5	5	4	2	0	2	0	0	0	0	1	1	76.1407	0.0001874	successful ranked
112	Glyceric acid	LC-ESI-QTOF (UPLC Q-Tof Premier; Waters)	negative	106.027	C3H6O4	1	1	1	3	3	-1	0.999999	-1	-1	-1	-1	-1	-1	16.7739	-1	Single candidate matches with the answer.
113	Glyceric acid	LC-ESI-QTOF	negative	106.027	C3H6O4	1	1	1	3	3	-1	0.999999	-1	-1	-1	-1	-1	-1	16.7739	-1	Single candidate matches with the answer.
114	Estrone	LC-ESI-qTof	positive	270.162	C18H22O2	4	5	5	791	30	2	1.02989	0	0	0.0666667	0	1	0	0.482366	0.0011472	successful ranked
115	L-Glutamic acid	LC-ESI-QTOF (UPLC Q-Tof Premier; Waters)	positive	147.053	C5H9NO4	1	1	1	4	4	-1	0.999999	-1	-1	-1	-1	-1	-1	5.76454	-1	Single candidate matches with the answer.
116	L-Glutamic acid	LC-ESI-QTOF (UPLC Q-Tof Premier; Waters)	negative	147.053	C5H9NO4	1	1	1	3	3	-1	0.999999	-1	-1	-1	-1	-1	-1	13.3089	-1	Single candidate matches with the answer.
117	L-Glutamic acid	LC-ESI-QTOF	negative	147.053	C5H9NO4	1	1	1	3	3	-1	0.999999	-1	-1	-1	-1	-1	-1	13.3089	-1	Single candidate matches with the answer.
118	L-Glutamic acid	LC-ESI-QTOF	positive	147.053	C5H9NO4	1	1	1	4	4	-1	0.999999	-1	-1	-1	-1	-1	-1	5.76454	-1	Single candidate matches with the answer.
119	Gentisic acid	LC-ESI-QTOF (UPLC Q-Tof Premier; Waters)	positive	154.027	C7H6O4	2	3	3	11	11	0	1.04762	0	0	0	0	1	0.047619	7.40736	0.0032625	successful ranked
120	Gentisic acid	LC-ESI-QTOF (UPLC Q-Tof Premier; Waters)	negative	154.027	C7H6O4	1	3	3	3	3	2	2	0	0	0.666667	1	0	0	25.1113	0.0002486	successful ranked
121	Gentisic acid	LC-ESI-QTOF	negative	154.027	C7H6O4	1	3	3	3	3	2	2	0	0	0.666667	1	0	0	25.1113	0.000247	successful ranked
122	Gentisic acid	LC-ESI-QTOF	positive	154.027	C7H6O4	2	3	3	11	11	0	1.04762	0	0	0	0	1	0.047619	7.40736	0.0003091	successful ranked
123	L-Tyrosine	LC-ESI-QTOF (UPLC Q-Tof Premier; Waters)	positive	181.074	C9H11NO3	1	1	2	5	4	0	0.999999	-1	0	-1	-1	-1	-1	11.9078	0.0001103	No mother-daughter relation is found for all the precursor formula.
124	L-Tyrosine	LC-ESI-QTOF (UPLC Q-Tof Premier; Waters)	negative	181.074	C9H11NO3	1	1	2	5	5	4	1.7	0	1	0.8	1	1	0.2	15.8791	0.0002329	successful ranked
125	L-Tyrosine	LC-ESI-QTOF	negative	181.074	C9H11NO3	1	1	2	5	5	4	1.7	0	1	0.8	1	1	0.2	15.8791	0.0001821	successful ranked
126	L-Tyrosine	LC-ESI-QTOF	positive	181.074	C9H11NO3	1	1	2	5	4	0	0.999999	-1	0	-1	-1	-1	-1	11.9078	0.0001091	No mother-daughter relation is found for all the precursor formula.
127	L-Phenylalanine	LC-ESI-QTOF (UPLC Q-Tof Premier; Waters)	negative	165.079	C9H11NO2	2	2	2	5	5	4	1.8	0	1	0.8	1	0	0.1	16.0983	0.0001753	successful ranked
128	L-Phenylalanine	LC-ESI-QTOF	negative	165.079	C9H11NO2	2	2	2	5	5	4	1.8	0	1	0.8	1	0	0.1	16.0983	0.0001686	successful ranked
129	L-Phenylalanine	LC-ESI-QTOF	positive	165.079	C9H11NO2	1	1	2	12	7	2	1.13333	0	1	0.333333	1	1	0.133333	7.04605	0.0016299	successful ranked
130	L-Phenylalanine	LC-ESI-QTOF	positive	165.079	C9H11NO2	1	1	2	11	7	1	1.06667	0	1	0.166667	1	1	0.0666667	7.30997	0.0020276	successful ranked
131	L-Phenylalanine	LC-ESI-QTOF	positive	165.079	C9H11NO2	1	1	2	11	7	1	1.06667	0	1	0.166667	1	1	0.0666667	10.5889	0.0004542	successful ranked
132	L-Proline	LC-ESI-QTOF (UPLC Q-Tof Premier; Waters)	positive	115.063	C5H9NO2	1	1	1	3	3	-1	0.999999	-1	-1	-1	-1	-1	-1	31.1026	-1	Single candidate matches with the answer.
133	L-Proline	LC-ESI-QTOF	positive	115.063	C5H9NO2	1	1	1	3	3	-1	0.999999	-1	-1	-1	-1	-1	-1	31.1026	-1	Single candidate matches with the answer.
134	L-Fucose	LC-ESI-QTOF (UPLC Q-Tof Premier; Waters)	negative	164.068	C6H12O5	1	1	3	3	2	0	0.999999	-1	0	-1	-1	-1	-1	9.76897	0	No mother-daughter relation is found for all the precursor formula.
135	L-Fucose	LC-ESI-QTOF	negative	164.068	C6H12O5	1	1	3	3	2	0	0.999999	-1	0	-1	-1	-1	-1	9.76897	0	No mother-daughter relation is found for all the precursor formula.
136	Inosinic acid	LC-ESI-QTOF (UPLC Q-Tof Premier; Waters)	positive	348.047	C10H13N4O8P	9	10	10	6	6	0	1.73333	1	0	0	0	1	0.266667	90.1727	0.0008549	successful ranked
137	Inosinic acid	LC-ESI-QTOF (UPLC Q-Tof Premier; Waters)	negative	348.047	C10H13N4O8P	4	4	10	7	7	2	1.33333	1	1	0.285714	0	0	0.0952381	47.8543	0.0008611	successful ranked
138	Inosinic acid	LC-ESI-QTOF	negative	348.047	C10H13N4O8P	4	4	10	7	7	2	1.33333	1	1	0.285714	0	0	0.0952381	47.8543	0.0007458	successful ranked
139	Inosinic acid	LC-ESI-QTOF	positive	348.047	C10H13N4O8P	9	10	10	6	6	0	1.73333	1	0	0	0	1	0.266667	90.1727	0.0007589	successful ranked
140	L-Histidine	LC-ESI-QTOF (UPLC Q-Tof Premier; Waters)	positive	155.069	C6H9N3O2	1	1	1	4	2	-1	0.999999	-1	-1	-1	-1	-1	-1	26.4683	-1	Single candidate matches with the answer.
141	L-Histidine	LC-ESI-QTOF (UPLC Q-Tof Premier; Waters)	positive	155.069	C6H9N3O2	1	1	1	3	3	-1	0.999999	-1	-1	-1	-1	-1	-1	13.4332	-1	Single candidate matches with the answer.
142	L-Histidine	LC-ESI-QTOF (UPLC Q-Tof Premier; Waters)	positive	155.069	C6H9N3O2	1	1	1	4	4	-1	0.999999	-1	-1	-1	-1	-1	-1	19.0913	-1	Single candidate matches with the answer.
143	L-Histidine	LC-ESI-QTOF (UPLC Q-Tof Premier; Waters)	negative	155.069	C6H9N3O2	1	1	1	9	9	-1	0.999999	-1	-1	-1	-1	-1	-1	9.05936	-1	Single candidate matches with the answer.
144	L-Histidine	LC-ESI-QTOF (UPLC Q-Tof Premier; Waters)	negative	155.069	C6H9N3O2	1	1	1	4	4	-1	0.999999	-1	-1	-1	-1	-1	-1	11.1958	-1	Single candidate matches with the answer.
145	L-Histidine	LC-ESI-QTOF	negative	155.069	C6H9N3O2	1	1	1	9	9	-1	0.999999	-1	-1	-1	-1	-1	-1	9.05936	-1	Single candidate matches with the answer.
146	L-Histidine	LC-ESI-QTOF	negative	155.069	C6H9N3O2	1	1	1	4	4	-1	0.999999	-1	-1	-1	-1	-1	-1	11.1958	-1	Single candidate matches with the answer.
147	L-Histidine	LC-ESI-QTOF	positive	155.069	C6H9N3O2	1	1	1	4	2	-1	0.999999	-1	-1	-1	-1	-1	-1	26.4683	-1	Single candidate matches with the answer.
148	L-Histidine	LC-ESI-QTOF	positive	155.069	C6H9N3O2	1	1	1	3	3	-1	0.999999	-1	-1	-1	-1	-1	-1	13.4332	-1	Single candidate matches with the answer.
149	L-Histidine	LC-ESI-QTOF	positive	155.069	C6H9N3O2	1	1	1	4	4	-1	0.999999	-1	-1	-1	-1	-1	-1	19.0913	-1	Single candidate matches with the answer.
150	L-Dopa	LC-ESI-QTOF (UPLC Q-Tof Premier; Waters)	positive	197.069	C9H11NO4	1	2	2	3	3	2	1.66667	0	0	0.666667	1	0	0	8.45093	0.0002011	successful ranked
151	L-Dopa	LC-ESI-QTOF (UPLC Q-Tof Premier; Waters)	positive	197.069	C9H11NO4	1	2	2	7	5	1	1.16667	0	0	0.25	1	0	0	13.6908	0.0001735	successful ranked
152	L-Dopa	LC-ESI-QTOF	positive	197.069	C9H11NO4	1	2	2	3	3	2	1.66667	0	0	0.666667	1	0	0	8.45093	0.0001759	successful ranked
153	L-Dopa	LC-ESI-QTOF	positive	197.069	C9H11NO4	1	2	2	7	5	1	1.16667	0	0	0.25	1	0	0	13.6908	0.0001971	successful ranked
154	L-Lysine	LC-ESI-QTOF (UPLC Q-Tof Premier; Waters)	positive	146.106	C6H14N2O2	1	1	1	3	3	-1	0.999998	-1	-1	-1	-1	-1	-1	20.4916	-1	Single candidate matches with the answer.
155	L-Lysine	LC-ESI-QTOF (UPLC Q-Tof Premier; Waters)	positive	146.106	C6H14N2O2	1	1	1	5	5	-1	0.999998	-1	-1	-1	-1	-1	-1	18.9113	-1	Single candidate matches with the answer.
156	L-Lysine	LC-ESI-QTOF	positive	146.106	C6H14N2O2	1	1	1	3	3	-1	0.999998	-1	-1	-1	-1	-1	-1	20.4916	-1	Single candidate matches with the answer.
157	L-Lysine	LC-ESI-QTOF	positive	146.106	C6H14N2O2	1	1	1	5	5	-1	0.999998	-1	-1	-1	-1	-1	-1	18.9113	-1	Single candidate matches with the answer.
158	Anserine	LC-ESI-QTOF (UPLC Q-Tof Premier; Waters)	positive	240.122	C10H16N4O3	1	1	2	9	9	2	1.14286	0	1	0.285714	1	1	0.0952381	16.8731	0.0002383	successful ranked
159	Anserine	LC-ESI-QTOF (UPLC Q-Tof Premier; Waters)	negative	240.122	C10H16N4O3	1	1	2	7	6	2	1.2	1	1	0.333333	1	1	0.133333	19.8378	0.0003136	successful ranked
160	Anserine	LC-ESI-QTOF	negative	240.122	C10H16N4O3	1	1	2	7	6	2	1.2	1	1	0.333333	1	1	0.133333	19.8378	0.0002521	successful ranked
161	Anserine	LC-ESI-QTOF	positive	240.122	C10H16N4O3	1	1	2	9	9	2	1.14286	0	1	0.285714	1	1	0.0952381	16.8731	0.0003545	successful ranked
162	Inosine	LC-ESI-QTOF (UPLC Q-Tof Premier; Waters)	positive	268.081	C10H12N4O5	4	4	5	4	5	1	1.3	1	1	0.2	0	0	0.1	58.9791	0.000662	successful ranked
163	Inosine	LC-ESI-QTOF (UPLC Q-Tof Premier; Waters)	negative	268.081	C10H12N4O5	4	5	5	4	4	0	1.66667	1	0	0	0	1	0.333333	59.889	0.0003229	successful ranked
164	Inosine	LC-ESI-QTOF	negative	268.081	C10H12N4O5	4	5	5	4	4	0	1.66667	1	0	0	0	1	0.333333	59.889	0.0003141	successful ranked
165	Inosine	LC-ESI-QTOF	positive	268.081	C10H12N4O5	4	4	5	4	5	1	1.3	1	1	0.2	0	0	0.1	58.9791	0.0003603	successful ranked
166	Indoleacetic acid	LC-ESI-QTOF (UPLC Q-Tof Premier; Waters)	positive	175.063	C10H9NO2	1	2	3	3	2	1	2	0	0	0.5	1	0	0	32.4757	0.0001683	successful ranked
167	Indoleacetic acid	LC-ESI-QTOF (UPLC Q-Tof Premier; Waters)	negative	175.063	C10H9NO2	1	2	3	4	4	2	2	0	0	0.666667	1	0	0	13.8533	0.0004777	successful ranked
168	Indoleacetic acid	LC-ESI-qTof	positive	175.063	C10H9NO2	2	2	3	44	26	4	1.10476	0	1	0.266667	0	1	0.00952381	4.39351	0.0017018	successful ranked
169	Indoleacetic acid	LC-ESI-QTOF	negative	175.063	C10H9NO2	1	2	3	4	4	2	2	0	0	0.666667	1	0	0	13.8533	0.0002184	successful ranked
170	Indoleacetic acid	LC-ESI-QTOF	positive	175.063	C10H9NO2	1	1	3	5	4	0	0.999999	-1	0	-1	-1	-1	-1	12.4684	0.0001729	No mother-daughter relation is found for all the precursor formula.
171	Indoleacetic acid	LC-ESI-QTOF	positive	175.063	C10H9NO2	1	1	3	16	15	0	0.999999	-1	0	-1	-1	-1	-1	5.10714	0.0002751	No mother-daughter relation is found for all the precursor formula.
172	Indoleacetic acid	LC-ESI-QTOF	positive	175.063	C10H9NO2	1	3	3	17	16	1	1.00833	0	0	0.0625	1	0	0	5.36359	0.0003112	successful ranked
173	Indoleacetic acid	LC-ESI-QTOF	positive	175.063	C10H9NO2	1	1	3	64	30	13	1.26087	0	1	0.541667	1	1	0.173913	2.60638	0.0007872	successful ranked
174	Indoleacetic acid	LC-ESI-QTOF	positive	175.063	C10H9NO2	1	1	3	59	30	10	1.22381	0	1	0.47619	1	1	0.152381	4.18099	0.0006268	successful ranked
175	Indoleacetic acid	LC-ESI-QTOF	positive	175.063	C10H9NO2	1	2	3	3	2	1	2	0	0	0.5	1	0	0	32.4757	0.0001726	successful ranked
176	Pantothenic acid	LC-ESI-QTOF	negative	219.111	C9H17NO5	1	1	3	6	6	4	1.8	0	1	0.8	1	1	0.8	28.9942	0.00037	successful ranked
177	Pantothenic acid	LC-ESI-QTOF	negative	219.111	C9H17NO5	1	1	3	6	6	4	1.8	0	1	0.8	1	1	0.8	28.9945	0.0003084	successful ranked
178	Pantothenic acid	LC-ESI-QTOF	positive	219.111	C9H17NO5	1	1	3	3	3	0	0.999998	-1	0	-1	-1	-1	-1	73.5524	0	No mother-daughter relation is found for all the precursor formula.
179	Pantothenic acid	LC-ESI-QTOF	positive	219.111	C9H17NO5	1	1	3	9	9	8	1.75	0	1	0.888889	1	1	0.75	17.4807	0.0002925	successful ranked
180	Pantothenic acid	LC-ESI-QTOF	positive	219.111	C9H17NO5	1	1	3	12	12	4	1.21429	0	1	0.5	1	1	0.178571	11.3615	0.0003322	successful ranked
181	Orotic acid	LC-ESI-QTOF (UPLC Q-Tof Premier; Waters)	positive	156.017	C5H4N2O4	1	1	3	7	7	3	2	0	1	0.75	1	1	0.833333	8.29213	0.0002407	successful ranked
182	Orotic acid	LC-ESI-QTOF	positive	156.017	C5H4N2O4	1	1	3	7	7	3	2	0	1	0.75	1	1	0.833333	8.29213	0.0002812	successful ranked
183	Nicotinamide ribotide	LC-ESI-QTOF (UPLC Q-Tof Premier; Waters)	positive	334.057	C11H15N2O8P	3	5	10	4	4	2	1.66667	1	0	0.5	0	0	0	110.081	0.0007532	successful ranked
184	Nicotinamide ribotide	LC-ESI-QTOF	positive	334.057	C11H15N2O8P	3	5	10	4	4	2	1.66667	1	0	0.5	0	0	0	110.081	0.0006172	successful ranked
185	Quinolinic acid	LC-ESI-QTOF	negative	167.022	C7H5NO4	1	2	3	4	3	1	1.33333	0	0	0.333333	1	0	0	29.6867	0.0001676	successful ranked
186	Quinolinic acid	LC-ESI-QTOF	positive	167.022	C7H5NO4	1	2	3	8	7	3	1.2381	0	0	0.428571	1	0	0	10.4739	0.0002644	successful ranked
187	Quinolinic acid	LC-ESI-QTOF	positive	167.022	C7H5NO4	1	1	3	12	13	7	1.29487	0	1	0.538462	1	1	0.0512821	6.92989	0.0003317	successful ranked
188	Quinolinic acid	LC-ESI-QTOF	positive	167.022	C7H5NO4	1	1	3	10	11	9	1.67273	0	1	0.818182	1	1	0.254545	6.38941	0.0003564	successful ranked
189	Thiamine	LC-ESI-QTOF (UPLC Q-Tof Premier; Waters)	positive	265.112	C12H17N4OS	1	2	2	4	4	2	1.33333	1	0	0.5	1	0	0	52.4735	0.0001916	successful ranked
190	Thiamine	LC-ESI-QTOF (UPLC Q-Tof Premier; Waters)	negative	265.112	C12H17N4OS	1	1	2	5	5	2	1.2	0	1	0.4	1	1	0.1	36.711	0.0001567	successful ranked
191	Thiamine	LC-ESI-QTOF	negative	265.112	C12H17N4OS	1	1	2	5	5	2	1.2	0	1	0.4	1	1	0.1	36.711	0.0001484	successful ranked
192	Thiamine	LC-ESI-QTOF	positive	265.112	C12H17N4OS	1	2	2	4	4	2	1.33333	1	0	0.5	1	0	0	52.4735	0.0001665	successful ranked
193	Pyridoxine	LC-ESI-QTOF (UPLC Q-Tof Premier; Waters)	positive	169.074	C8H11NO3	2	2	2	3	3	2	2	0	0	0.666667	1	0	0	0.000119659	0.0001677	successful ranked
194	Pyridoxine	LC-ESI-QTOF (UPLC Q-Tof Premier; Waters)	negative	169.074	C8H11NO3	1	1	2	10	10	8	1.97222	0	1	0.888889	1	1	0.583333	6.63065	0.0002709	successful ranked
195	Pyridoxine	LC-ESI-QTOF	negative	169.074	C8H11NO3	1	1	2	10	10	8	1.97222	0	1	0.888889	1	1	0.583333	6.63065	0.000237	successful ranked
196	Pyridoxine	LC-ESI-QTOF	positive	169.074	C8H11NO3	2	2	2	3	3	2	2	0	0	0.666667	1	0	0	0.000119659	0.0001818	successful ranked
197	Riboflavin	LC-ESI-QTOF (UPLC Q-Tof Premier; Waters)	positive	376.138	C17H20N4O6	1	1	11	4	4	3	1.83333	0	1	0.75	1	1	0.5	57.6921	0.0006799	successful ranked
198	Riboflavin	LC-ESI-QTOF (UPLC Q-Tof Premier; Waters)	negative	376.138	C17H20N4O6	8	11	11	5	5	0	1.7	1	0	0	0	1	0.3	50.2035	0.0007153	successful ranked
199	Riboflavin	LC-ESI-qTof	positive	376.138	C17H20N4O6	1	1	11	147	30	16	1.24615	1	1	0.615385	1	1	0.126154	3.88533	0.0023006	successful ranked
200	Riboflavin	LC-ESI-QTOF	negative	376.138	C17H20N4O6	8	11	11	5	5	0	1.7	1	0	0	0	1	0.3	50.2035	0.0006804	successful ranked
201	Riboflavin	LC-ESI-QTOF	positive	376.138	C17H20N4O6	1	1	11	4	4	3	1.83333	0	1	0.75	1	1	0.5	57.6921	0.000615	successful ranked
202	Taurine	LC-ESI-QTOF (UPLC Q-Tof Premier; Waters)	positive	125.015	C2H7NO3S	1	2	5	3	3	1	2	0	0	0.5	1	0	0	3.57998	0.0012517	successful ranked
203	Taurine	LC-ESI-QTOF	positive	125.015	C2H7NO3S	1	2	5	3	3	1	2	0	0	0.5	1	0	0	3.57998	0.0003214	successful ranked
204	Succinic acid	LC-ESI-QTOF (UPLC Q-Tof Premier; Waters)	negative	118.027	C4H6O4	1	1	1	3	3	-1	0.999999	-1	-1	-1	-1	-1	-1	13.3087	-1	Single candidate matches with the answer.
205	Succinic acid	LC-ESI-QTOF (UPLC Q-Tof Premier; Waters)	negative	118.027	C4H6O4	1	1	1	5	4	-1	0.999999	-1	-1	-1	-1	-1	-1	12.0181	-1	Single candidate matches with the answer.
206	Succinic acid	LC-ESI-QTOF	negative	118.027	C4H6O4	1	1	1	3	3	-1	0.999999	-1	-1	-1	-1	-1	-1	13.3087	-1	Single candidate matches with the answer.
207	Succinic acid	LC-ESI-QTOF	negative	118.027	C4H6O4	1	1	1	5	4	-1	0.999999	-1	-1	-1	-1	-1	-1	12.0181	-1	Single candidate matches with the answer.
208	Sucrose	LC-ESI-QTOF (UPLC Q-Tof Premier; Waters)	negative	342.116	C12H22O11	1	1	11	12	12	10	1.96364	0	1	0.909091	1	1	0.345455	43.9492	0.0012156	successful ranked
209	Sucrose	LC-ESI-QTOF	negative	342.116	C12H22O11	1	1	11	12	12	10	1.96364	0	1	0.909091	1	1	0.345455	43.9492	0.0011158	successful ranked
210	Serotonin	LC-ESI-QTOF (UPLC Q-Tof Premier; Waters)	positive	176.095	C10H12N2O	1	2	2	3	2	1	2	0	0	0.5	1	0	0	9.7022	0.0001102	successful ranked
211	Serotonin	LC-ESI-QTOF (UPLC Q-Tof Premier; Waters)	positive	176.095	C10H12N2O	1	1	2	6	2	1	2	0	1	0.5	1	1	1	6.87694	0.0001021	successful ranked
212	Serotonin	LC-ESI-QTOF	positive	176.095	C10H12N2O	1	1	2	4	5	0	0.999999	-1	0	-1	-1	-1	-1	11.4304	0.0001601	No mother-daughter relation is found for all the precursor formula.
213	Serotonin	LC-ESI-QTOF	positive	176.095	C10H12N2O	1	1	2	31	30	14	1.37143	0	1	0.666667	1	1	0.1	4.46178	0.0004654	successful ranked
214	Serotonin	LC-ESI-QTOF	positive	176.095	C10H12N2O	1	1	2	55	30	11	1.22857	0	1	0.52381	1	0	0.0047619	3.33067	0.0004389	successful ranked
215	Serotonin	LC-ESI-QTOF	positive	176.095	C10H12N2O	1	1	2	69	30	13	1.30303	0	1	0.590909	1	1	0.194805	3.01649	0.0004649	successful ranked
216	Serotonin	LC-ESI-QTOF	positive	176.095	C10H12N2O	1	2	2	3	2	1	2	0	0	0.5	1	0	0	9.7022	0.0001261	successful ranked
217	Serotonin	LC-ESI-QTOF	positive	176.095	C10H12N2O	1	1	2	6	2	1	2	0	1	0.5	1	1	1	6.87694	0.0001087	successful ranked
218	Thymine	LC-ESI-QTOF (UPLC Q-Tof Premier; Waters)	positive	126.043	C5H6N2O2	1	1	1	4	4	-1	0.999999	-1	-1	-1	-1	-1	-1	12.2293	-1	Single candidate matches with the answer.
219	Thymine	LC-ESI-QTOF (UPLC Q-Tof Premier; Waters)	positive	126.043	C5H6N2O2	1	1	1	7	7	-1	0.999999	-1	-1	-1	-1	-1	-1	11.9168	-1	Single candidate matches with the answer.
220	Thymine	LC-ESI-QTOF	positive	126.043	C5H6N2O2	1	1	1	4	4	-1	0.999999	-1	-1	-1	-1	-1	-1	12.2293	-1	Single candidate matches with the answer.
221	Thymine	LC-ESI-QTOF	positive	126.043	C5H6N2O2	1	1	1	7	7	-1	0.999999	-1	-1	-1	-1	-1	-1	11.9168	-1	Single candidate matches with the answer.
222	Phosphoenolpyruvic acid	LC-ESI-QTOF (UPLC Q-Tof Premier; Waters)	negative	167.982	C3H5O6P	1	1	3	3	3	0	0.999999	-1	0	-1	-1	-1	-1	36.3614	0	No mother-daughter relation is found for all the precursor formula.
223	Phosphoenolpyruvic acid	LC-ESI-QTOF	negative	167.982	C3H5O6P	1	1	3	3	3	0	0.999999	-1	0	-1	-1	-1	-1	36.3614	0	No mother-daughter relation is found for all the precursor formula.
224	Sphinganine	LC-ESI-qTof	positive	301.298	C18H39NO2	1	1	1	1058	30	-1	0.999997	-1	-1	-1	-1	-1	-1	0.295701	-1	Single candidate matches with the answer.
225	Phosphoserine	LC-ESI-QTOF (UPLC Q-Tof Premier; Waters)	negative	185.009	C3H8NO6P	1	1	5	3	3	2	2	0	1	0.666667	1	1	1	45.9399	0.0002785	successful ranked
226	Phosphoserine	LC-ESI-QTOF	negative	185.009	C3H8NO6P	1	1	5	3	3	2	2	0	1	0.666667	1	1	1	45.9399	0.0002142	successful ranked
227	Saccharopine	LC-ESI-QTOF (UPLC Q-Tof Premier; Waters)	positive	276.132	C11H20N2O6	1	1	3	9	9	7	1.72222	0	1	0.777778	1	1	0.527778	20.2613	0.0003148	successful ranked
228	Saccharopine	LC-ESI-QTOF (UPLC Q-Tof Premier; Waters)	negative	276.132	C11H20N2O6	1	1	3	5	5	3	1.5	0	1	0.6	1	1	0.4	21.0297	0.0002527	successful ranked
229	Saccharopine	LC-ESI-QTOF	negative	276.132	C11H20N2O6	1	1	3	5	5	3	1.5	0	1	0.6	1	1	0.4	21.0297	0.0002218	successful ranked
230	Saccharopine	LC-ESI-QTOF	positive	276.132	C11H20N2O6	1	1	3	9	9	7	1.72222	0	1	0.777778	1	1	0.527778	20.2613	0.0003067	successful ranked
231	Uridine 5'-monophosphate	LC-ESI-QTOF (UPLC Q-Tof Premier; Waters)	negative	324.036	C9H13N2O9P	1	1	7	5	5	2	1.5	1	1	0.5	1	0	0.166667	52.8062	0.0013602	successful ranked
232	Uridine 5'-monophosphate	LC-ESI-QTOF	negative	324.036	C9H13N2O9P	1	1	7	5	5	2	1.5	1	1	0.5	1	0	0.166667	52.8062	0.0005376	successful ranked
233	Uridine diphosphate-N-acetylglucosamine	LC-ESI-QTOF (UPLC Q-Tof Premier; Waters)	negative	607.082	C17H27N3O17P2	2	2	3	12	12	4	1.22222	1	1	0.444444	1	0	0.0277778	56.0692	0.0003352	successful ranked
234	Uridine diphosphate-N-acetylglucosamine	LC-ESI-QTOF (UPLC Q-Tof Premier; Waters)	negative	607.082	C17H27N3O17P2	1	1	3	18	18	11	1.35294	1	1	0.611111	1	1	0.313725	47.5296	0.0004442	successful ranked
235	Uridine diphosphate-N-acetylglucosamine	LC-ESI-QTOF	negative	607.082	C17H27N3O17P2	2	2	3	12	12	4	1.22222	1	1	0.444444	1	0	0.0277778	56.0692	0.0003438	successful ranked
236	Uridine diphosphate-N-acetylglucosamine	LC-ESI-QTOF	negative	607.082	C17H27N3O17P2	1	1	3	18	18	11	1.35294	1	1	0.611111	1	1	0.313725	47.5296	0.0004115	successful ranked
237	Uridine 5'-diphosphate	LC-ESI-QTOF (UPLC Q-Tof Premier; Waters)	negative	404.002	C9H14N2O12P2	1	1	6	6	6	4	1.46667	0	1	0.666667	1	0	0.133333	43.4812	0.0004604	successful ranked
238	Uridine 5'-diphosphate	LC-ESI-QTOF	negative	404.002	C9H14N2O12P2	1	1	6	6	6	4	1.46667	0	1	0.666667	1	0	0.133333	43.4812	0.0004316	successful ranked
239	Uridine	LC-ESI-QTOF (UPLC Q-Tof Premier; Waters)	negative	244.07	C9H12N2O6	1	1	5	6	6	5	2	0	1	0.833333	1	1	0.866667	18.2315	0.0003998	successful ranked
240	Uridine	LC-ESI-QTOF	negative	244.07	C9H12N2O6	1	1	5	6	6	5	2	0	1	0.833333	1	1	0.866667	18.2315	0.0003243	successful ranked
241	Xanthosine	LC-ESI-QTOF (UPLC Q-Tof Premier; Waters)	negative	284.076	C10H12N4O6	5	10	10	3	3	0	1.66667	1	0	0	0	0	0	67.3449	0.0005138	successful ranked
242	Xanthosine	LC-ESI-QTOF (UPLC Q-Tof Premier; Waters)	negative	284.076	C10H12N4O6	6	10	10	3	3	0	1.66667	1	0	0	0	0	0	67.3448	0.0004754	successful ranked
243	Xanthosine	LC-ESI-QTOF	negative	284.076	C10H12N4O6	5	10	10	3	3	0	1.66667	1	0	0	0	0	0	67.3449	0.0004946	successful ranked
244	Xanthosine	LC-ESI-QTOF	negative	284.076	C10H12N4O6	6	10	10	3	3	0	1.66667	1	0	0	0	0	0	67.3448	0.0004781	successful ranked
245	Uracil	LC-ESI-QTOF (UPLC Q-Tof Premier; Waters)	positive	112.027	C4H4N2O2	1	1	1	3	2	-1	0.999999	-1	-1	-1	-1	-1	-1	11.4086	-1	Single candidate matches with the answer.
246	Uracil	LC-ESI-QTOF	positive	112.027	C4H4N2O2	1	1	1	3	2	-1	0.999999	-1	-1	-1	-1	-1	-1	11.4086	-1	Single candidate matches with the answer.
247	Urocanic acid	LC-ESI-QTOF (UPLC Q-Tof Premier; Waters)	positive	138.043	C6H6N2O2	1	1	1	5	5	-1	0.999999	-1	-1	-1	-1	-1	-1	11.5482	-1	Single candidate matches with the answer.
248	Urocanic acid	LC-ESI-QTOF	positive	138.043	C6H6N2O2	1	1	1	5	5	-1	0.999999	-1	-1	-1	-1	-1	-1	11.5482	-1	Single candidate matches with the answer.
249	Uridine diphosphategalactose	LC-ESI-QTOF (UPLC Q-Tof Premier; Waters)	negative	566.055	C15H24N2O17P2	1	1	6	14	14	7	1.28205	1	1	0.538462	1	0	0.128205	41.1371	0.0006981	successful ranked
250	Tyramine	LC-ESI-QTOF (UPLC Q-Tof Premier; Waters)	positive	137.084	C8H11NO	1	1	1	6	6	-1	0.999999	-1	-1	-1	-1	-1	-1	6.4997	-1	Single candidate matches with the answer.
251	Tyramine	LC-ESI-QTOF	positive	137.084	C8H11NO	1	1	1	4	4	-1	0.999999	-1	-1	-1	-1	-1	-1	7.19198	-1	Single candidate matches with the answer.
252	Tyramine	LC-ESI-QTOF	positive	137.084	C8H11NO	1	1	1	6	7	-1	0.999999	-1	-1	-1	-1	-1	-1	7.23245	-1	Single candidate matches with the answer.
253	Tyramine	LC-ESI-QTOF	positive	137.084	C8H11NO	1	1	1	16	17	-1	0.999999	-1	-1	-1	-1	-1	-1	5.62514	-1	Single candidate matches with the answer.
254	Tyramine	LC-ESI-QTOF	positive	137.084	C8H11NO	1	1	1	17	15	-1	0.999999	-1	-1	-1	-1	-1	-1	5.68544	-1	Single candidate matches with the answer.
255	Tyramine	LC-ESI-QTOF	positive	137.084	C8H11NO	1	1	1	21	20	-1	0.999999	-1	-1	-1	-1	-1	-1	7.17011	-1	Single candidate matches with the answer.
256	Tyramine	LC-ESI-QTOF	positive	137.084	C8H11NO	1	1	1	4	3	-1	0.999999	-1	-1	-1	-1	-1	-1	9.57658	-1	Single candidate matches with the answer.
257	Tyramine	LC-ESI-QTOF	positive	137.084	C8H11NO	1	1	1	5	4	-1	0.999999	-1	-1	-1	-1	-1	-1	8.21703	-1	Single candidate matches with the answer.
258	Tyramine	LC-ESI-QTOF	positive	137.084	C8H11NO	1	1	1	17	6	-1	0.999999	-1	-1	-1	-1	-1	-1	5.52637	-1	Single candidate matches with the answer.
259	Tyramine	LC-ESI-QTOF	positive	137.084	C8H11NO	1	1	1	6	6	-1	0.999999	-1	-1	-1	-1	-1	-1	6.4997	-1	Single candidate matches with the answer.
260	Tyramine	LC-ESI-QTOF	positive	137.084	C8H11NO	1	1	1	6	7	-1	0.999999	-1	-1	-1	-1	-1	-1	7.23226	-1	Single candidate matches with the answer.
261	Tyramine	LC-ESI-QTOF	positive	137.084	C8H11NO	1	1	1	12	13	-1	0.999999	-1	-1	-1	-1	-1	-1	6.46087	-1	Single candidate matches with the answer.
262	Tyramine	LC-ESI-QTOF	positive	137.084	C8H11NO	1	1	1	13	14	-1	0.999999	-1	-1	-1	-1	-1	-1	6.57	-1	Single candidate matches with the answer.
263	Tyramine	LC-ESI-QTOF	positive	137.084	C8H11NO	1	1	1	23	24	-1	0.999999	-1	-1	-1	-1	-1	-1	5.13455	-1	Single candidate matches with the answer.
264	3-Hydroxymethylglutaric acid	LC-ESI-QTOF (UPLC Q-Tof Premier; Waters)	positive	162.053	C6H10O5	1	1	3	7	7	4	1.6	0	1	0.666667	1	1	0.533333	9.00832	0.0003997	successful ranked
265	3-Hydroxymethylglutaric acid	LC-ESI-QTOF (UPLC Q-Tof Premier; Waters)	negative	162.053	C6H10O5	1	1	3	7	5	2	1.66667	0	1	0.666667	1	1	0.666667	19.7826	0.0005486	successful ranked
266	3-Hydroxymethylglutaric acid	LC-ESI-QTOF	negative	162.053	C6H10O5	1	1	3	7	5	2	1.66667	0	1	0.666667	1	1	0.666667	19.7826	0.0004052	successful ranked
267	3-Hydroxymethylglutaric acid	LC-ESI-QTOF	positive	162.053	C6H10O5	1	1	3	7	7	4	1.6	0	1	0.666667	1	1	0.533333	9.00832	0.0004101	successful ranked
268	2-Methylglutaric acid	LC-ESI-QTOF (UPLC Q-Tof Premier; Waters)	negative	146.058	C6H10O4	1	1	1	3	3	-1	0.999999	-1	-1	-1	-1	-1	-1	22.1145	-1	Single candidate matches with the answer.
269	2-Methylglutaric acid	LC-ESI-QTOF	negative	146.058	C6H10O4	1	1	1	3	3	-1	0.999999	-1	-1	-1	-1	-1	-1	22.1145	-1	Single candidate matches with the answer.
270	L-alpha-Aminobutyric acid	LC-ESI-QTOF (UPLC Q-Tof Premier; Waters)	positive	103.063	C4H9NO2	1	1	1	3	3	-1	0.999999	-1	-1	-1	-1	-1	-1	26.0806	-1	Single candidate matches with the answer.
271	L-alpha-Aminobutyric acid	LC-ESI-QTOF	positive	103.063	C4H9NO2	1	1	1	3	3	-1	0.999999	-1	-1	-1	-1	-1	-1	26.0806	-1	Single candidate matches with the answer.
272	5-Hydroxy-L-tryptophan	LC-ESI-QTOF	positive	220.085	C11H12N2O3	2	2	2	34	26	9	1.17787	0	1	0.391304	0	1	0.0869565	5.25506	0.0006502	successful ranked
273	5-Hydroxy-L-tryptophan	LC-ESI-QTOF	positive	220.085	C11H12N2O3	1	1	2	36	30	15	1.19704	0	1	0.517241	1	1	0.08867	4.94548	0.00045	successful ranked
274	5-Hydroxy-L-tryptophan	LC-ESI-QTOF	positive	220.085	C11H12N2O3	1	1	2	49	30	22	1.30484	0	1	0.814815	1	1	0.190883	6.12583	0.0005516	successful ranked
275	3-Methylhistidine	LC-ESI-QTOF (UPLC Q-Tof Premier; Waters)	positive	169.085	C7H11N3O2	1	1	1	6	6	-1	0.999999	-1	-1	-1	-1	-1	-1	17.6419	-1	Single candidate matches with the answer.
276	3-Methylhistidine	LC-ESI-QTOF (UPLC Q-Tof Premier; Waters)	negative	169.085	C7H11N3O2	1	1	1	4	4	-1	0.999999	-1	-1	-1	-1	-1	-1	19.5476	-1	Single candidate matches with the answer.
277	3-Methylhistidine	LC-ESI-QTOF	negative	169.085	C7H11N3O2	1	1	1	4	4	-1	0.999999	-1	-1	-1	-1	-1	-1	19.5476	-1	Single candidate matches with the answer.
278	3-Methylhistidine	LC-ESI-QTOF	positive	169.085	C7H11N3O2	1	1	1	6	6	-1	0.999999	-1	-1	-1	-1	-1	-1	17.6419	-1	Single candidate matches with the answer.
279	4-Hydroxybenzoic acid	LC-ESI-QTOF (UPLC Q-Tof Premier; Waters)	positive	138.032	C7H6O3	1	1	3	3	3	2	1.66667	0	1	0.666667	1	1	0.333333	5.63517	0.0003615	successful ranked
280	4-Hydroxybenzoic acid	LC-ESI-QTOF (UPLC Q-Tof Premier; Waters)	positive	138.032	C7H6O3	1	1	3	10	10	0	0.999995	-1	0	-1	-1	-1	-1	11.2354	0.0002717	No mother-daughter relation is found for all the precursor formula.
281	4-Hydroxybenzoic acid	LC-ESI-QTOF	positive	138.032	C7H6O3	1	1	3	3	3	2	1.66667	0	1	0.666667	1	1	0.333333	5.63517	0.000204	successful ranked
282	4-Hydroxybenzoic acid	LC-ESI-QTOF	positive	138.032	C7H6O3	1	1	3	10	10	0	0.999995	-1	0	-1	-1	-1	-1	11.2354	0.0002456	No mother-daughter relation is found for all the precursor formula.
283	Allocholic acid	LC-ESI-QTOF	negative	408.288	C24H40O5	1	1	5	4	4	0	0.999997	-1	0	-1	-1	-1	-1	33.0862	0.0002498	No mother-daughter relation is found for all the precursor formula.
284	Allocholic acid	LC-ESI-QTOF	negative	408.288	C24H40O5	1	1	5	11	11	10	1.85455	0	1	0.909091	1	1	0.418182	45.3798	0.0005497	successful ranked
285	Capric acid	LC-ESI-qTof	positive	172.146	C10H20O2	1	1	1	209	30	-1	0.999998	-1	-1	-1	-1	-1	-1	1.22542	-1	Single candidate matches with the answer.
286	L-Arginine	LC-ESI-QTOF (UPLC Q-Tof Premier; Waters)	positive	174.112	C6H14N4O2	1	1	1	5	5	-1	0.999998	-1	-1	-1	-1	-1	-1	14.4663	-1	Single candidate matches with the answer.
287	L-Arginine	LC-ESI-QTOF (UPLC Q-Tof Premier; Waters)	positive	174.112	C6H14N4O2	1	1	1	5	5	-1	0.999998	-1	-1	-1	-1	-1	-1	14.4663	-1	Single candidate matches with the answer.
288	L-Arginine	LC-ESI-QTOF (UPLC Q-Tof Premier; Waters)	positive	174.112	C6H14N4O2	1	1	1	5	5	-1	0.999998	-1	-1	-1	-1	-1	-1	14.4663	-1	Single candidate matches with the answer.
289	L-Arginine	LC-ESI-QTOF	positive	174.112	C6H14N4O2	1	1	1	5	5	-1	0.999998	-1	-1	-1	-1	-1	-1	14.4663	-1	Single candidate matches with the answer.
290	L-Arginine	LC-ESI-QTOF	positive	174.112	C6H14N4O2	1	1	1	5	5	-1	0.999998	-1	-1	-1	-1	-1	-1	14.4663	-1	Single candidate matches with the answer.
291	L-Arginine	LC-ESI-QTOF	positive	174.112	C6H14N4O2	1	1	1	5	5	-1	0.999998	-1	-1	-1	-1	-1	-1	14.4663	-1	Single candidate matches with the answer.
292	Acetylglycine	LC-ESI-QTOF (UPLC Q-Tof Premier; Waters)	negative	117.043	C4H7NO3	1	1	1	3	3	-1	0.999999	-1	-1	-1	-1	-1	-1	23.7028	-1	Single candidate matches with the answer.
293	Acetylglycine	LC-ESI-QTOF	negative	117.043	C4H7NO3	1	1	1	3	3	-1	0.999999	-1	-1	-1	-1	-1	-1	23.7028	-1	Single candidate matches with the answer.
294	Epietiocholanolone	LC-ESI-qTof	positive	290.225	C19H30O2	2	2	3	620	30	7	1.06404	0	1	0.241379	0	0	0.00985222	0.55083	0.000602	successful ranked
295	DL-Dopa	LC-ESI-QTOF	negative	197.069	C9H11NO4	1	1	2	23	19	7	1.28788	0	1	0.583333	1	1	0.0454545	5.83359	0.0003696	successful ranked
296	DL-Dopa	LC-ESI-QTOF	negative	197.069	C9H11NO4	1	1	2	24	25	7	1.12105	0	1	0.35	1	0	0.0526316	5.03591	0.0004057	successful ranked
297	DL-Dopa	LC-ESI-QTOF	negative	197.069	C9H11NO4	2	2	2	8	9	3	1.19444	0	1	0.333333	0	1	0.0277778	20.7195	0.0002072	successful ranked
298	DL-Dopa	LC-ESI-QTOF	positive	197.069	C9H11NO4	2	2	2	106	20	12	1.27451	0	0	0.666667	1	0	0	2.8291	0.0003771	successful ranked
299	DL-Dopa	LC-ESI-QTOF	positive	197.069	C9H11NO4	2	2	2	68	29	10	1.15	0	1	0.4	0	1	0.0433333	3.445	0.0005672	successful ranked
300	DL-Dopa	LC-ESI-QTOF	positive	197.069	C9H11NO4	2	2	2	31	28	6	1.08333	0	1	0.25	0	1	0.0507246	8.6429	0.0004913	successful ranked
301	D-Ribulose 5-phosphate	LC-ESI-QTOF	negative	230.019	C5H11O8P	1	2	5	3	3	1	2	0	0	0.5	1	0	0	71.605	0.000325	successful ranked
302	Cholic acid	LC-ESI-QTOF	negative	408.288	C24H40O5	1	1	5	4	4	0	0.999997	-1	0	-1	-1	-1	-1	33.0862	0.0002798	No mother-daughter relation is found for all the precursor formula.
303	Cholic acid	LC-ESI-QTOF	negative	408.288	C24H40O5	1	1	5	11	11	10	1.85455	0	1	0.909091	1	1	0.418182	45.3798	0.0005316	successful ranked
304	Deoxycholic acid	LC-ESI-QTOF (UPLC Q-Tof Premier; Waters)	negative	392.293	C24H40O4	2	3	3	4	4	0	1.33333	0	0	0	0	1	0.333333	21.2264	0.0002585	successful ranked
305	Deoxycholic acid	LC-ESI-QTOF (UPLC Q-Tof Premier; Waters)	negative	392.293	C24H40O4	1	1	3	7	7	6	1.80952	0	1	0.857143	1	1	0.52381	12.8006	0.0002709	successful ranked
306	Deoxycholic acid	LC-ESI-QTOF	negative	392.293	C24H40O4	2	3	3	4	4	0	1.33333	0	0	0	0	1	0.333333	21.2264	0.000227	successful ranked
307	Deoxycholic acid	LC-ESI-QTOF	negative	392.293	C24H40O4	1	1	3	7	7	6	1.80952	0	1	0.857143	1	1	0.52381	12.8006	0.0002599	successful ranked
308	Galactaric acid	LC-ESI-QTOF (UPLC Q-Tof Premier; Waters)	negative	210.038	C6H10O8	1	1	6	7	7	4	1.53333	0	1	0.666667	1	1	0.266667	23.3336	0.000545	successful ranked
309	Galactaric acid	LC-ESI-QTOF	negative	210.038	C6H10O8	1	1	6	7	7	4	1.53333	0	1	0.666667	1	1	0.266667	23.3336	0.0004798	successful ranked
310	Levoglucosan	LC-ESI-QTOF (UPLC Q-Tof Premier; Waters)	positive	162.053	C6H10O5	1	2	3	5	5	1	1.33333	0	0	0.333333	1	0	0	9.16342	0.0003224	successful ranked
311	Levoglucosan	LC-ESI-QTOF	positive	162.053	C6H10O5	1	2	3	5	5	1	1.33333	0	0	0.333333	1	0	0	9.16342	0.0002586	successful ranked
312	L-Glutamine	LC-ESI-QTOF (UPLC Q-Tof Premier; Waters)	positive	146.069	C5H10N2O3	1	1	1	3	3	-1	0.999999	-1	-1	-1	-1	-1	-1	20.4914	-1	Single candidate matches with the answer.
313	L-Glutamine	LC-ESI-QTOF	positive	146.069	C5H10N2O3	1	1	1	3	3	-1	0.999999	-1	-1	-1	-1	-1	-1	20.4914	-1	Single candidate matches with the answer.
314	Glutaric acid	LC-ESI-QTOF (UPLC Q-Tof Premier; Waters)	negative	132.042	C5H8O4	1	1	1	3	3	-1	0.999999	-1	-1	-1	-1	-1	-1	13.3089	-1	Single candidate matches with the answer.
315	Glutaric acid	LC-ESI-QTOF	negative	132.042	C5H8O4	1	1	1	3	3	-1	0.999999	-1	-1	-1	-1	-1	-1	13.3089	-1	Single candidate matches with the answer.
316	Leucinic acid	LC-ESI-QTOF (UPLC Q-Tof Premier; Waters)	negative	132.079	C6H12O3	1	1	1	3	3	-1	0.999999	-1	-1	-1	-1	-1	-1	23.3513	-1	Single candidate matches with the answer.
317	Leucinic acid	LC-ESI-QTOF	negative	132.079	C6H12O3	1	1	1	3	3	-1	0.999999	-1	-1	-1	-1	-1	-1	23.3513	-1	Single candidate matches with the answer.
318	Indolelactic acid	LC-ESI-qTof	positive	205.074	C11H11NO3	1	1	2	127	30	13	1.18571	0	1	0.619048	1	0	0.0238095	2.37309	0.0004885	successful ranked
319	Indoxyl sulfate	LC-ESI-QTOF (UPLC Q-Tof Premier; Waters)	negative	213.01	C8H7NO4S	2	2	3	4	4	1	1.66667	0	1	0.25	0	1	0.5	39.3454	0.0009513	successful ranked
320	Indoxyl sulfate	LC-ESI-QTOF	negative	213.01	C8H7NO4S	2	2	3	4	4	1	1.66667	0	1	0.25	0	1	0.5	39.3454	0.0001978	successful ranked
321	L-Kynurenine	LC-ESI-QTOF	positive	208.085	C10H12N2O3	1	1	1	15	14	-1	0.999999	-1	-1	-1	-1	-1	-1	7.3219	-1	Single candidate matches with the answer.
322	L-Kynurenine	LC-ESI-QTOF	positive	208.085	C10H12N2O3	1	1	1	23	24	-1	0.999999	-1	-1	-1	-1	-1	-1	5.50329	-1	Single candidate matches with the answer.
323	L-Kynurenine	LC-ESI-QTOF	positive	208.085	C10H12N2O3	1	1	1	22	23	-1	0.999999	-1	-1	-1	-1	-1	-1	8.40877	-1	Single candidate matches with the answer.
324	L-Kynurenine	LC-ESI-QTOF	positive	208.085	C10H12N2O3	1	1	1	18	19	-1	0.999999	-1	-1	-1	-1	-1	-1	9.58594	-1	Single candidate matches with the answer.
325	L-Kynurenine	LC-ESI-QTOF	positive	208.085	C10H12N2O3	1	1	1	14	15	-1	0.999999	-1	-1	-1	-1	-1	-1	16.0883	-1	Single candidate matches with the answer.
326	L-Leucine	LC-ESI-QTOF (UPLC Q-Tof Premier; Waters)	positive	131.095	C6H13NO2	1	1	1	4	3	-1	0.999999	-1	-1	-1	-1	-1	-1	9.50482	-1	Single candidate matches with the answer.
327	1-Methylnicotinamide	LC-ESI-QTOF (UPLC Q-Tof Premier; Waters)	positive	137.071	C7H9N2O	1	1	2	4	4	0	0.999999	-1	0	-1	-1	-1	-1	19.5751	0.0001462	No mother-daughter relation is found for all the precursor formula.
328	1-Methylnicotinamide	LC-ESI-QTOF (UPLC Q-Tof Premier; Waters)	positive	137.071	C7H9N2O	1	1	2	9	9	8	1.77778	0	1	0.888889	1	1	0.5	13.1923	0.0002479	successful ranked
329	1-Methylnicotinamide	LC-ESI-QTOF	positive	137.071	C7H9N2O	1	1	2	4	4	0	0.999999	-1	0	-1	-1	-1	-1	19.5751	0.0001189	No mother-daughter relation is found for all the precursor formula.
330	1-Methylnicotinamide	LC-ESI-QTOF	positive	137.071	C7H9N2O	1	1	2	9	9	8	1.77778	0	1	0.888889	1	1	0.5	13.1923	0.0002393	successful ranked
331	Hippuric acid	LC-ESI-QTOF	negative	179.058	C9H9NO3	1	2	2	6	6	1	1.1	0	0	0.2	1	0	0	7.36863	0.0002207	successful ranked
332	Kynurenic acid	LC-ESI-QTOF (UPLC Q-Tof Premier; Waters)	positive	189.043	C10H7NO3	2	2	2	7	7	1	1.14286	0	1	0.142857	0	1	0.0952381	10.2661	0.0001794	successful ranked
333	Kynurenic acid	LC-ESI-qTof	positive	189.043	C10H7NO3	1	2	2	296	31	5	1.05848	0	0	0.263158	1	0	0	0.946025	0.0004651	successful ranked
334	Kynurenic acid	LC-ESI-QTOF	negative	189.043	C10H7NO3	1	1	2	4	3	1	1.33333	0	1	0.333333	1	1	0.333333	29.6871	0.000182	successful ranked
335	Kynurenic acid	LC-ESI-QTOF	negative	189.043	C10H7NO3	1	1	2	4	5	3	1.6	0	1	0.6	1	1	0.3	18.0738	0.0002238	successful ranked
336	Kynurenic acid	LC-ESI-QTOF	negative	189.043	C10H7NO3	1	1	2	4	5	3	1.6	0	1	0.6	1	1	0.3	18.0742	0.0001943	successful ranked
337	Kynurenic acid	LC-ESI-QTOF	negative	189.043	C10H7NO3	1	1	2	5	6	4	1.66667	0	1	0.666667	1	1	0.266667	18.1906	0.0002273	successful ranked
338	Kynurenic acid	LC-ESI-QTOF	positive	189.043	C10H7NO3	1	2	2	7	5	3	1.5	0	0	0.6	1	0	0	8.52969	0.0002114	successful ranked
339	Kynurenic acid	LC-ESI-QTOF	positive	189.043	C10H7NO3	1	2	2	8	7	3	1.2381	0	0	0.428571	1	0	0	7.74392	0.0001992	successful ranked
340	Kynurenic acid	LC-ESI-QTOF	positive	189.043	C10H7NO3	1	1	2	7	8	4	1.35714	0	1	0.5	1	0	0.107143	13.0472	0.0002607	successful ranked
341	Kynurenic acid	LC-ESI-QTOF	positive	189.043	C10H7NO3	1	1	2	11	12	5	1.21212	0	1	0.416667	1	0	0.0454545	9.46116	0.0003184	successful ranked
342	Kynurenic acid	LC-ESI-QTOF	positive	189.043	C10H7NO3	1	1	2	12	13	6	1.25758	0	1	0.5	1	1	0.0757576	9.13772	0.0003404	successful ranked
343	Kynurenic acid	LC-ESI-QTOF	positive	189.043	C10H7NO3	2	2	2	7	7	1	1.14286	0	1	0.142857	0	1	0.0952381	10.2661	0.0001956	successful ranked
344	Kynurenic acid	LC-ESI-QTOF	positive	189.043	C10H7NO3	1	2	2	10	10	3	1.28571	0	0	0.428571	1	0	0	10.4305	0.0002519	successful ranked
345	Kynurenic acid	LC-ESI-QTOF	positive	189.043	C10H7NO3	1	2	2	8	9	2	1.2	0	0	0.333333	1	0	0	13.0987	0.0004635	successful ranked
346	Kynurenic acid	LC-ESI-QTOF	positive	189.043	C10H7NO3	1	1	2	10	11	2	1.07143	0	1	0.25	1	1	0.0357143	14.5416	0.0002383	successful ranked
347	L-Homoserine	LC-ESI-QTOF (UPLC Q-Tof Premier; Waters)	negative	119.058	C4H9NO3	1	1	1	5	5	-1	0.999999	-1	-1	-1	-1	-1	-1	11.8803	-1	Single candidate matches with the answer.
348	L-Homoserine	LC-ESI-QTOF	negative	119.058	C4H9NO3	1	1	1	5	5	-1	0.999999	-1	-1	-1	-1	-1	-1	11.8803	-1	Single candidate matches with the answer.
349	4-Hydroxyproline	LC-ESI-QTOF (UPLC Q-Tof Premier; Waters)	positive	131.058	C5H9NO3	1	1	1	3	3	-1	0.999999	-1	-1	-1	-1	-1	-1	19.7955	-1	Single candidate matches with the answer.
350	4-Hydroxyproline	LC-ESI-QTOF (UPLC Q-Tof Premier; Waters)	negative	131.058	C5H9NO3	1	1	1	4	4	-1	0.999999	-1	-1	-1	-1	-1	-1	20.3109	-1	Single candidate matches with the answer.
351	4-Hydroxyproline	LC-ESI-QTOF	negative	131.058	C5H9NO3	1	1	1	4	4	-1	0.999999	-1	-1	-1	-1	-1	-1	20.3109	-1	Single candidate matches with the answer.
352	4-Hydroxyproline	LC-ESI-QTOF	positive	131.058	C5H9NO3	1	1	1	3	3	-1	0.999999	-1	-1	-1	-1	-1	-1	19.7955	-1	Single candidate matches with the answer.
353	Alpha-Hydroxyisobutyric acid	LC-ESI-QTOF (UPLC Q-Tof Premier; Waters)	negative	104.047	C4H8O3	1	1	1	7	3	-1	0.999999	-1	-1	-1	-1	-1	-1	14.1863	-1	Single candidate matches with the answer.
354	Alpha-Hydroxyisobutyric acid	LC-ESI-QTOF	negative	104.047	C4H8O3	1	1	1	7	3	-1	0.999999	-1	-1	-1	-1	-1	-1	14.1863	-1	Single candidate matches with the answer.
355	Cysteine-S-sulfate	LC-ESI-QTOF (UPLC Q-Tof Premier; Waters)	positive	200.977	C3H7NO5S2	1	1	2	3	3	2	2	0	1	0.666667	1	1	0.666667	25.4328	0.0002839	successful ranked
356	Cysteine-S-sulfate	LC-ESI-QTOF (UPLC Q-Tof Premier; Waters)	negative	200.977	C3H7NO5S2	1	1	2	7	7	6	1.66667	0	1	0.857143	1	1	0.619048	23.0542	0.0002906	successful ranked
357	Cysteine-S-sulfate	LC-ESI-QTOF	negative	200.977	C3H7NO5S2	1	1	2	7	7	6	1.66667	0	1	0.857143	1	1	0.619048	23.0542	0.0002242	successful ranked
358	Cysteine-S-sulfate	LC-ESI-QTOF	positive	200.977	C3H7NO5S2	1	1	2	3	3	2	2	0	1	0.666667	1	1	0.666667	25.4328	0.0001674	successful ranked
359	Hydroxykynurenine	LC-ESI-QTOF (UPLC Q-Tof Premier; Waters)	positive	224.08	C10H12N2O4	1	1	2	3	2	0	0.999998	-1	0	-1	-1	-1	-1	10.6031	0.0001072	No mother-daughter relation is found for all the precursor formula.
360	Hydroxykynurenine	LC-ESI-QTOF (UPLC Q-Tof Premier; Waters)	positive	224.08	C10H12N2O4	2	2	2	11	7	1	1.04762	0	0	0.142857	1	0	0	18.2303	0.0002255	successful ranked
361	Hydroxykynurenine	LC-ESI-QTOF (UPLC Q-Tof Premier; Waters)	negative	224.08	C10H12N2O4	1	1	2	13	13	0	0.999998	-1	0	-1	-1	-1	-1	8.82488	0.000238	No mother-daughter relation is found for all the precursor formula.
362	Hydroxykynurenine	LC-ESI-QTOF	negative	224.08	C10H12N2O4	1	1	2	13	13	0	0.999998	-1	0	-1	-1	-1	-1	8.82488	0.0001934	No mother-daughter relation is found for all the precursor formula.
363	Hydroxykynurenine	LC-ESI-QTOF	positive	224.08	C10H12N2O4	1	1	2	18	17	13	1.47794	0	1	0.764706	1	1	0.455882	7.51916	0.0003393	successful ranked
364	Hydroxykynurenine	LC-ESI-QTOF	positive	224.08	C10H12N2O4	1	1	2	23	24	17	1.43478	0	1	0.73913	1	1	0.426877	5.04636	0.0003904	successful ranked
365	Hydroxykynurenine	LC-ESI-QTOF	positive	224.08	C10H12N2O4	1	1	2	32	30	23	1.40394	0	1	0.793103	1	1	0.391626	6.25201	0.0004194	successful ranked
366	Hydroxykynurenine	LC-ESI-QTOF	positive	224.08	C10H12N2O4	1	1	2	30	30	25	1.44335	0	1	0.862069	1	1	0.435961	6.8603	0.000455	successful ranked
367	Hydroxykynurenine	LC-ESI-QTOF	positive	224.08	C10H12N2O4	1	1	2	32	30	24	1.29803	0	1	0.827586	1	1	0.283251	10.963	0.0004442	successful ranked
368	Hydroxykynurenine	LC-ESI-QTOF	positive	224.08	C10H12N2O4	1	1	2	3	2	0	0.999998	-1	0	-1	-1	-1	-1	10.6031	0.0001065	No mother-daughter relation is found for all the precursor formula.
369	Hydroxykynurenine	LC-ESI-QTOF	positive	224.08	C10H12N2O4	2	2	2	11	7	1	1.04762	0	0	0.142857	1	0	0	18.2303	0.0001703	successful ranked
370	Homocarnosine	LC-ESI-QTOF (UPLC Q-Tof Premier; Waters)	negative	240.122	C10H16N4O3	1	1	2	4	4	3	2	0	1	0.75	1	1	1	35.4265	0.0001579	successful ranked
371	Homocarnosine	LC-ESI-QTOF	negative	240.122	C10H16N4O3	1	1	2	4	4	3	2	0	1	0.75	1	1	1	35.4265	0.00014	successful ranked
372	3-Hydroxymandelic acid	LC-ESI-QTOF (UPLC Q-Tof Premier; Waters)	negative	168.042	C8H8O4	1	1	2	3	3	2	2	0	1	0.666667	1	1	0.666667	24.8364	0.0001422	successful ranked
373	3-Hydroxymandelic acid	LC-ESI-QTOF	negative	168.042	C8H8O4	1	1	2	3	3	2	2	0	1	0.666667	1	1	0.666667	24.8364	0.0001262	successful ranked
374	Hydroxyphenyllactic acid	LC-ESI-QTOF (UPLC Q-Tof Premier; Waters)	negative	182.058	C9H10O4	1	2	3	7	6	5	1.73333	0	0	0.833333	1	0	0	17.2242	0.0003043	successful ranked
375	Hydroxyphenyllactic acid	LC-ESI-QTOF	negative	182.058	C9H10O4	1	2	3	7	6	5	1.73333	0	0	0.833333	1	0	0	17.2242	0.0002665	successful ranked
376	5-Hydroxyindoleacetic acid	LC-ESI-QTOF	positive	191.058	C10H9NO3	1	1	3	8	6	1	1.16667	0	1	0.25	1	1	0.166667	35.9276	0.0002892	successful ranked
377	5-Hydroxyindoleacetic acid	LC-ESI-QTOF	positive	191.058	C10H9NO3	1	2	3	5	5	1	1.16667	0	0	0.25	1	0	0	21.5088	0.0002689	successful ranked
378	5-Hydroxyindoleacetic acid	LC-ESI-QTOF	positive	191.058	C10H9NO3	1	1	3	41	26	9	1.11429	0	1	0.428571	1	1	0.0809524	5.2088	0.0005083	successful ranked
379	5-Hydroxyindoleacetic acid	LC-ESI-QTOF	positive	191.058	C10H9NO3	1	1	3	46	30	11	1.17846	0	1	0.423077	1	1	0.141538	6.97229	0.0006809	successful ranked
380	Mannitol	LC-ESI-QTOF (UPLC Q-Tof Premier; Waters)	negative	182.079	C6H14O6	1	1	4	10	10	8	1.94444	0	1	0.888889	1	1	0.861111	12.494	0.0005281	successful ranked
381	Mannitol	LC-ESI-QTOF	negative	182.079	C6H14O6	1	1	4	10	10	8	1.94444	0	1	0.888889	1	1	0.861111	12.494	0.0005099	successful ranked
382	Oxypurinol	LC-ESI-QTOF (UPLC Q-Tof Premier; Waters)	positive	152.033	C5H4N4O2	1	1	2	5	5	4	1.7	0	1	0.8	1	1	0.6	12.6971	0.0002203	successful ranked
383	Oxypurinol	LC-ESI-QTOF	positive	152.033	C5H4N4O2	1	1	2	5	5	4	1.7	0	1	0.8	1	1	0.6	12.6971	0.0002269	successful ranked
384	Sebacic acid	LC-ESI-QTOF (UPLC Q-Tof Premier; Waters)	negative	202.121	C10H18O4	1	1	2	4	4	3	2	0	1	0.75	1	1	1	18.4285	0.0002075	successful ranked
385	Sebacic acid	LC-ESI-QTOF	negative	202.121	C10H18O4	1	1	2	4	4	3	2	0	1	0.75	1	1	1	18.4285	0.0002064	successful ranked
386	Rhamnose	LC-ESI-QTOF (UPLC Q-Tof Premier; Waters)	negative	164.068	C6H12O5	1	1	3	3	2	0	0.999999	-1	0	-1	-1	-1	-1	9.76897	0	No mother-daughter relation is found for all the precursor formula.
387	Rhamnose	LC-ESI-QTOF	negative	164.068	C6H12O5	1	1	3	3	2	0	0.999999	-1	0	-1	-1	-1	-1	9.76897	0	No mother-daughter relation is found for all the precursor formula.
388	Methyl hippurate	LC-ESI-qTof	positive	193.074	C10H11NO3	2	2	2	34	12	1	1.2	0	1	0.2	0	1	0.1	18.5158	0.000909	successful ranked
389	Histamine	LC-ESI-QTOF (UPLC Q-Tof Premier; Waters)	positive	111.08	C5H9N3	1	1	1	3	2	-1	0.999999	-1	-1	-1	-1	-1	-1	11.9552	-1	Single candidate matches with the answer.
390	Histamine	LC-ESI-QTOF	positive	111.08	C5H9N3	1	1	1	3	2	-1	0.999999	-1	-1	-1	-1	-1	-1	11.9552	-1	Single candidate matches with the answer.
391	Trigonelline	LC-ESI-QTOF (UPLC Q-Tof Premier; Waters)	positive	137.048	C7H7NO2	1	1	2	4	4	0	0.999999	-1	0	-1	-1	-1	-1	21.6172	0.0001405	No mother-daughter relation is found for all the precursor formula.
392	Trigonelline	LC-ESI-QTOF (UPLC Q-Tof Premier; Waters)	positive	137.048	C7H7NO2	1	1	2	9	9	7	1.75	0	1	0.777778	1	1	0.444444	9.78384	0.000288	successful ranked
393	Trigonelline	LC-ESI-QTOF	positive	137.048	C7H7NO2	1	1	2	4	4	0	0.999999	-1	0	-1	-1	-1	-1	21.6172	0.0001384	No mother-daughter relation is found for all the precursor formula.
394	Trigonelline	LC-ESI-QTOF	positive	137.048	C7H7NO2	1	1	2	9	9	7	1.75	0	1	0.777778	1	1	0.444444	9.78384	0.0002524	successful ranked
395	Xanthurenic acid	LC-ESI-qTOF	positive	205.038	C10H7NO4	1	1	3	150	31	6	1.04667	0	1	0.24	1	0	0.00666667	1.9143	0.0005781	successful ranked
396	Xanthurenic acid	LC-ESI-QTOF	negative	205.038	C10H7NO4	1	3	3	4	3	1	1.33333	0	0	0.333333	1	0	0	24.5334	0.0002128	successful ranked
397	Xanthurenic acid	LC-ESI-QTOF	negative	205.038	C10H7NO4	1	2	3	4	4	2	1.5	0	0	0.5	1	0	0	24.8251	0.0002453	successful ranked
398	Xanthurenic acid	LC-ESI-QTOF	negative	205.038	C10H7NO4	2	2	3	9	10	6	1.4	0	1	0.6	0	1	0.0222222	15.1585	0.0003492	successful ranked
399	Xanthurenic acid	LC-ESI-QTOF	negative	205.038	C10H7NO4	1	1	3	12	13	10	1.52564	0	1	0.769231	1	1	0.205128	12.2206	0.0003801	successful ranked
400	Xanthurenic acid	LC-ESI-QTOF	negative	205.038	C10H7NO4	1	1	3	9	10	8	1.6	0	1	0.8	1	1	0.288889	14.5039	0.0002963	successful ranked
401	Xanthurenic acid	LC-ESI-QTOF	positive	205.038	C10H7NO4	1	2	3	6	4	3	1.83333	0	0	0.75	1	0	0	8.55012	0.000223	successful ranked
402	Xanthurenic acid	LC-ESI-QTOF	positive	205.038	C10H7NO4	1	1	3	9	8	4	1.32143	0	1	0.5	1	1	0.142857	10.4291	0.0002482	successful ranked
403	Xanthurenic acid	LC-ESI-QTOF	positive	205.038	C10H7NO4	1	1	3	7	8	4	1.35714	0	1	0.5	1	1	0.142857	13.2094	0.0002629	successful ranked
404	Xanthurenic acid	LC-ESI-QTOF	positive	205.038	C10H7NO4	1	1	3	8	9	5	1.38889	0	1	0.555556	1	1	0.138889	12.9806	0.0003166	successful ranked
405	Xanthurenic acid	LC-ESI-QTOF	positive	205.038	C10H7NO4	1	1	3	9	10	8	1.64444	0	1	0.8	1	1	0.422222	11.5105	0.0003284	successful ranked
406	L-Valine	LC-ESI-QTOF (UPLC Q-Tof Premier; Waters)	positive	117.079	C5H11NO2	1	1	1	3	3	-1	0.999999	-1	-1	-1	-1	-1	-1	20.4917	-1	Single candidate matches with the answer.
407	L-Valine	LC-ESI-QTOF	positive	117.079	C5H11NO2	1	1	1	3	3	-1	0.999999	-1	-1	-1	-1	-1	-1	20.4917	-1	Single candidate matches with the answer.
408	Acetylcholine	LC-ESI-QTOF (UPLC Q-Tof Premier; Waters)	positive	146.118	C7H16NO2	1	1	1	3	2	-1	0.999998	-1	-1	-1	-1	-1	-1	33.6797	-1	Single candidate matches with the answer.
409	Acetylcholine	LC-ESI-QTOF (UPLC Q-Tof Premier; Waters)	positive	146.118	C7H16NO2	1	1	1	3	2	-1	0.999998	-1	-1	-1	-1	-1	-1	33.7728	-1	Single candidate matches with the answer.
410	Acetylcholine	LC-ESI-QTOF	positive	146.118	C7H16NO2	1	1	1	4	4	-1	0.999998	-1	-1	-1	-1	-1	-1	24.4892	-1	Single candidate matches with the answer.
411	Acetylcholine	LC-ESI-QTOF	positive	146.118	C7H16NO2	1	1	1	3	2	-1	0.999998	-1	-1	-1	-1	-1	-1	33.6797	-1	Single candidate matches with the answer.
412	Acetylcholine	LC-ESI-QTOF	positive	146.118	C7H16NO2	1	1	1	3	2	-1	0.999998	-1	-1	-1	-1	-1	-1	33.7728	-1	Single candidate matches with the answer.
413	Ergocalciferol	LC-ESI-QTOF (UPLC Q-Tof Premier; Waters)	positive	396.339	C28H44O	1	1	1	26	26	-1	0.999997	-1	-1	-1	-1	-1	-1	24.4311	-1	Single candidate matches with the answer.
414	Ergocalciferol	LC-ESI-QTOF	positive	396.339	C28H44O	1	1	1	26	26	-1	0.999997	-1	-1	-1	-1	-1	-1	24.4311	-1	Single candidate matches with the answer.
415	Citrulline	LC-ESI-QTOF (UPLC Q-Tof Premier; Waters)	positive	175.096	C6H13N3O3	1	1	1	7	7	-1	0.999998	-1	-1	-1	-1	-1	-1	20.5808	-1	Single candidate matches with the answer.
416	Citrulline	LC-ESI-QTOF	positive	175.096	C6H13N3O3	1	1	1	7	7	-1	0.999998	-1	-1	-1	-1	-1	-1	20.5808	-1	Single candidate matches with the answer.
417	Deoxyadenosine monophosphate	LC-ESI-QTOF (UPLC Q-Tof Premier; Waters)	positive	331.068	C10H14N5O6P	2	5	7	3	3	1	2	0	0	0.333333	0	1	0.666667	99.6883	0.0003895	successful ranked
418	Deoxyadenosine monophosphate	LC-ESI-QTOF (UPLC Q-Tof Premier; Waters)	negative	331.068	C10H14N5O6P	1	1	7	6	6	4	1.66667	1	1	0.666667	1	1	0.533333	48.1644	0.0005199	successful ranked
419	Deoxyadenosine monophosphate	LC-ESI-QTOF	negative	331.068	C10H14N5O6P	1	1	7	6	6	4	1.66667	1	1	0.666667	1	1	0.533333	48.1644	0.0004816	successful ranked
420	Deoxyadenosine monophosphate	LC-ESI-QTOF	positive	331.068	C10H14N5O6P	2	5	7	3	3	1	2	0	0	0.333333	0	1	0.666667	99.6883	0.0003513	successful ranked
421	Trimethylamine N-oxide	LC-ESI-QTOF (UPLC Q-Tof Premier; Waters)	positive	75.0684	C3H9NO	1	1	1	4	4	-1	0.999999	-1	-1	-1	-1	-1	-1	8.68321	-1	Single candidate matches with the answer.
422	Trimethylamine N-oxide	LC-ESI-QTOF	positive	75.0684	C3H9NO	1	1	1	4	4	-1	0.999999	-1	-1	-1	-1	-1	-1	8.68321	-1	Single candidate matches with the answer.
423	L-Tryptophan	LC-ESI-QTOF (UPLC Q-Tof Premier; Waters)	positive	204.09	C11H12N2O2	1	1	1	4	4	-1	0.999999	-1	-1	-1	-1	-1	-1	8.29943	-1	Single candidate matches with the answer.
424	L-Tryptophan	LC-ESI-QTOF (UPLC Q-Tof Premier; Waters)	negative	204.09	C11H12N2O2	1	1	1	5	5	-1	0.999999	-1	-1	-1	-1	-1	-1	18.2807	-1	Single candidate matches with the answer.
425	L-Tryptophan	LC-ESI-QTOF	negative	204.09	C11H12N2O2	1	1	1	5	4	-1	0.999999	-1	-1	-1	-1	-1	-1	18.332	-1	Single candidate matches with the answer.
426	L-Tryptophan	LC-ESI-QTOF	negative	204.09	C11H12N2O2	1	1	1	7	6	-1	0.999999	-1	-1	-1	-1	-1	-1	11.5848	-1	Single candidate matches with the answer.
427	L-Tryptophan	LC-ESI-QTOF	negative	204.09	C11H12N2O2	1	1	1	3	4	-1	0.999999	-1	-1	-1	-1	-1	-1	30.2057	-1	Single candidate matches with the answer.
428	L-Tryptophan	LC-ESI-QTOF	negative	204.09	C11H12N2O2	1	1	1	5	5	-1	0.999999	-1	-1	-1	-1	-1	-1	18.2807	-1	Single candidate matches with the answer.
429	L-Tryptophan	LC-ESI-QTOF	positive	204.09	C11H12N2O2	1	1	1	6	5	-1	0.999999	-1	-1	-1	-1	-1	-1	11.9401	-1	Single candidate matches with the answer.
430	L-Tryptophan	LC-ESI-QTOF	positive	204.09	C11H12N2O2	1	1	1	14	15	-1	0.999999	-1	-1	-1	-1	-1	-1	6.44003	-1	Single candidate matches with the answer.
431	L-Tryptophan	LC-ESI-QTOF	positive	204.09	C11H12N2O2	1	1	1	20	21	-1	0.999999	-1	-1	-1	-1	-1	-1	5.48352	-1	Single candidate matches with the answer.
432	L-Tryptophan	LC-ESI-QTOF	positive	204.09	C11H12N2O2	1	1	1	26	27	-1	0.999999	-1	-1	-1	-1	-1	-1	7.21387	-1	Single candidate matches with the answer.
433	L-Tryptophan	LC-ESI-QTOF	positive	204.09	C11H12N2O2	1	1	1	28	29	-1	0.999999	-1	-1	-1	-1	-1	-1	8.96771	-1	Single candidate matches with the answer.
434	L-Tryptophan	LC-ESI-QTOF	positive	204.09	C11H12N2O2	1	1	1	22	15	-1	0.999999	-1	-1	-1	-1	-1	-1	5.45266	-1	Single candidate matches with the answer.
435	L-Tryptophan	LC-ESI-QTOF	positive	204.09	C11H12N2O2	1	1	1	27	20	-1	0.999999	-1	-1	-1	-1	-1	-1	4.62558	-1	Single candidate matches with the answer.
436	L-Tryptophan	LC-ESI-QTOF	positive	204.09	C11H12N2O2	1	1	1	31	26	-1	0.999999	-1	-1	-1	-1	-1	-1	4.42271	-1	Single candidate matches with the answer.
437	L-Tryptophan	LC-ESI-QTOF	positive	204.09	C11H12N2O2	1	1	1	4	4	-1	0.999999	-1	-1	-1	-1	-1	-1	8.29943	-1	Single candidate matches with the answer.
438	trans-Cinnamic acid	LC-ESI-QTOF (UPLC Q-Tof Premier; Waters)	positive	148.052	C9H8O2	1	1	4	3	2	0	0.999999	-1	0	-1	-1	-1	-1	10.3519	0.0024386	No mother-daughter relation is found for all the precursor formula.
439	trans-Cinnamic acid	LC-ESI-QTOF (UPLC Q-Tof Premier; Waters)	negative	148.052	C9H8O2	1	2	4	5	3	1	2	0	0	0.5	1	0	0	19.017	0.0003307	successful ranked
440	trans-Cinnamic acid	LC-ESI-QTOF	negative	148.052	C9H8O2	1	2	4	5	3	1	2	0	0	0.5	1	0	0	19.017	0.0002702	successful ranked
441	trans-Cinnamic acid	LC-ESI-QTOF	positive	148.052	C9H8O2	1	1	4	3	2	0	0.999999	-1	0	-1	-1	-1	-1	10.3519	0.0002199	No mother-daughter relation is found for all the precursor formula.
442	S-Adenosylhomocysteine	LC-ESI-QTOF (UPLC Q-Tof Premier; Waters)	positive	384.122	C14H20N6O5S	4	7	11	5	5	2	1.5	1	0	0.4	0	1	0.2	61.3483	0.0007784	successful ranked
443	S-Adenosylhomocysteine	LC-ESI-QTOF	positive	384.122	C14H20N6O5S	4	7	11	5	5	2	1.5	1	0	0.4	0	1	0.2	61.3483	0.0007231	successful ranked
444	Ursodeoxycholic acid	LC-ESI-qTof	positive	392.293	C24H40O4	3	3	3	219	30	3	1.09474	0	1	0.15	0	0	0.0105263	4.7064	0.0005826	successful ranked
445	trans-Ferulic acid	LC-ESI-QTOF (UPLC Q-Tof Premier; Waters)	positive	194.058	C10H10O4	2	4	4	5	4	1	1.5	0	0	0.25	0	1	0.333333	12.8567	0.0002642	successful ranked
446	trans-Ferulic acid	LC-ESI-QTOF (UPLC Q-Tof Premier; Waters)	negative	194.058	C10H10O4	1	2	4	4	4	3	1.83333	0	0	0.75	1	0	0	11.829	0.0002777	successful ranked
447	trans-Ferulic acid	LC-ESI-QTOF	negative	194.058	C10H10O4	1	2	4	4	4	3	1.83333	0	0	0.75	1	0	0	11.829	0.0002559	successful ranked
448	trans-Ferulic acid	LC-ESI-QTOF	positive	194.058	C10H10O4	2	4	4	5	4	1	1.5	0	0	0.25	0	1	0.333333	12.8567	0.0002436	successful ranked
449	Pyrocatechol	LC-ESI-QTOF (UPLC Q-Tof Premier; Waters)	negative	110.037	C6H6O2	1	2	2	3	2	1	2	0	0	0.5	1	0	0	9.53894	0.0001093	successful ranked
450	Pyrocatechol	LC-ESI-QTOF (UPLC Q-Tof Premier; Waters)	negative	110.037	C6H6O2	1	1	2	4	3	2	1.66667	0	1	0.666667	1	1	0.333333	8.03736	0.000142	successful ranked
451	Pyrocatechol	LC-ESI-QTOF	negative	110.037	C6H6O2	1	2	2	3	2	1	2	0	0	0.5	1	0	0	9.53894	0.0001026	successful ranked
452	Pyrocatechol	LC-ESI-QTOF	negative	110.037	C6H6O2	1	1	2	4	3	2	1.66667	0	1	0.666667	1	1	0.333333	8.03736	0.0001295	successful ranked
453	Tiglylglycine	LC-ESI-QTOF (UPLC Q-Tof Premier; Waters)	positive	157.074	C7H11NO3	1	1	1	9	9	-1	0.999999	-1	-1	-1	-1	-1	-1	14.8912	-1	Single candidate matches with the answer.
454	Tiglylglycine	LC-ESI-QTOF (UPLC Q-Tof Premier; Waters)	negative	157.074	C7H11NO3	1	1	1	5	5	-1	0.999999	-1	-1	-1	-1	-1	-1	17.8485	-1	Single candidate matches with the answer.
455	Tiglylglycine	LC-ESI-QTOF	negative	157.074	C7H11NO3	1	1	1	5	5	-1	0.999999	-1	-1	-1	-1	-1	-1	17.8485	-1	Single candidate matches with the answer.
456	Tiglylglycine	LC-ESI-QTOF	positive	157.074	C7H11NO3	1	1	1	9	9	-1	0.999999	-1	-1	-1	-1	-1	-1	14.8912	-1	Single candidate matches with the answer.
457	dGDP	LC-ESI-QTOF	negative	427.029	C10H15N5O10P2	1	1	4	3	3	2	2	0	1	0.666667	1	1	0.666667	137.083	0.000252	successful ranked
458	Hypotaurine	LC-ESI-QTOF (UPLC Q-Tof Premier; Waters)	negative	109.02	C2H7NO2S	2	2	3	3	3	1	2	0	1	0.333333	0	1	0.666667	24.5628	0.0002446	successful ranked
459	Hypotaurine	LC-ESI-QTOF	negative	109.02	C2H7NO2S	2	2	3	3	3	1	2	0	1	0.333333	0	1	0.666667	24.5628	0.0001683	successful ranked
460	Trehalose	LC-ESI-QTOF (UPLC Q-Tof Premier; Waters)	positive	342.116	C12H22O11	4	11	11	8	4	0	1.16667	0	0	0	0	0	0	56.0539	0.0004843	successful ranked
461	Trehalose	LC-ESI-QTOF (UPLC Q-Tof Premier; Waters)	negative	342.116	C12H22O11	1	1	11	11	11	9	1.95556	0	1	0.9	1	1	0.377778	45.7514	0.0011076	successful ranked
462	Trehalose	LC-ESI-QTOF	negative	342.116	C12H22O11	1	1	11	11	11	9	1.95556	0	1	0.9	1	1	0.377778	45.7514	0.0011348	successful ranked
463	Trehalose	LC-ESI-QTOF	positive	342.116	C12H22O11	4	11	11	8	4	0	1.16667	0	0	0	0	0	0	56.0539	0.0004835	successful ranked
464	Arachidonic acid	LC-ESI-QTOF (UPLC Q-Tof Premier; Waters)	negative	304.24	C20H32O2	1	1	4	9	8	0	0.999997	-1	0	-1	-1	-1	-1	26.3379	0.0002869	No mother-daughter relation is found for all the precursor formula.
465	Arachidonic acid	LC-ESI-QTOF	negative	304.24	C20H32O2	1	1	4	9	8	0	0.999997	-1	0	-1	-1	-1	-1	26.3379	0.0002769	No mother-daughter relation is found for all the precursor formula.
466	2'-Deoxyguanosine 5'-monophosphate	LC-ESI-QTOF (UPLC Q-Tof Premier; Waters)	positive	347.063	C10H14N5O7P	6	7	7	5	5	1	1.6	1	0	0.2	0	0	0	86.3122	0.0005316	successful ranked
467	2'-Deoxyguanosine 5'-monophosphate	LC-ESI-QTOF (UPLC Q-Tof Premier; Waters)	negative	347.063	C10H14N5O7P	1	2	7	5	5	2	1.3	1	0	0.4	1	0	0	80.7262	0.0004345	successful ranked
468	2'-Deoxyguanosine 5'-monophosphate	LC-ESI-QTOF	negative	347.063	C10H14N5O7P	1	2	7	5	5	2	1.3	1	0	0.4	1	0	0	80.7262	0.0004209	successful ranked
469	2'-Deoxyguanosine 5'-monophosphate	LC-ESI-QTOF	positive	347.063	C10H14N5O7P	6	7	7	5	5	1	1.6	1	0	0.2	0	0	0	86.3122	0.0004956	successful ranked
470	Cotinine	LC-ESI-QTOF	positive	176.095	C10H12N2O	1	1	2	6	6	3	1.5	0	1	0.6	1	1	0.2	13.2061	0.000171	successful ranked
471	Cotinine	LC-ESI-QTOF	positive	176.095	C10H12N2O	1	1	2	8	8	3	1.5	0	1	0.6	1	1	0.4	11.7132	0.0001848	successful ranked
472	gamma-Glutamylcysteine	LC-ESI-QTOF (UPLC Q-Tof Premier; Waters)	positive	250.062	C8H14N2O5S	1	1	7	11	11	4	1.2	0	1	0.4	1	1	0.0888889	17.6718	0.0007201	successful ranked
473	gamma-Glutamylcysteine	LC-ESI-QTOF	positive	250.062	C8H14N2O5S	1	1	7	11	11	4	1.2	0	1	0.4	1	1	0.0888889	17.6718	0.0006431	successful ranked
474	S-Lactoylglutathione	LC-ESI-QTOF	negative	379.105	C13H21N3O8S	1	1	7	19	19	15	1.52632	1	1	0.789474	1	1	0.146199	12.9197	0.00098	successful ranked
475	S-Lactoylglutathione	LC-ESI-QTOF	positive	379.105	C13H21N3O8S	1	1	7	9	9	7	1.44444	0	1	0.777778	1	1	0.0277778	41.8604	0.0006282	successful ranked
476	D-Glyceraldehyde 3-phosphate	LC-ESI-QTOF	negative	169.998	C3H7O6P	1	1	3	16	16	2	1.5	0	1	0.5	1	1	0.5	13.7546	0.0003374	successful ranked
477	2-Aminobenzoic acid	LC-ESI-QTOF (UPLC Q-Tof Premier; Waters)	positive	137.048	C7H7NO2	1	2	2	4	4	2	2	0	0	0.666667	1	0	0	5.50171	0.0001665	successful ranked
478	2-Aminobenzoic acid	LC-ESI-QTOF	positive	137.048	C7H7NO2	1	2	2	4	4	2	2	0	0	0.666667	1	0	0	5.50171	0.0001473	successful ranked
479	Nornicotine	LC-ESI-QTOF	positive	148.1	C9H12N2	1	1	2	7	6	4	1.6	0	1	0.666667	1	1	0.4	6.79507	0.0002184	successful ranked
480	Nornicotine	LC-ESI-QTOF	positive	148.1	C9H12N2	1	2	2	12	11	5	1.26667	0	0	0.5	1	0	0	5.07912	0.0002254	successful ranked
481	Nornicotine	LC-ESI-QTOF	positive	148.1	C9H12N2	1	1	2	12	12	6	1.25455	0	1	0.545455	1	1	0.0909091	4.64867	0.000233	successful ranked
482	Nornicotine	LC-ESI-QTOF	positive	148.1	C9H12N2	2	2	2	7	8	3	1.28571	0	1	0.428571	1	0	0.047619	6.02431	0.0002438	successful ranked
483	Nornicotine	LC-ESI-QTOF	positive	148.1	C9H12N2	1	1	2	3	4	2	1.5	0	1	0.5	1	1	0.333333	9.09045	0.000162	successful ranked
484	N-Acetylglutamic acid	LC-ESI-QTOF (UPLC Q-Tof Premier; Waters)	positive	189.064	C7H11NO5	1	1	2	19	19	9	1.39744	0	1	0.692308	1	1	0.346154	7.88416	0.0003165	successful ranked
485	N-Acetylglutamic acid	LC-ESI-QTOF (UPLC Q-Tof Premier; Waters)	negative	189.064	C7H11NO5	1	1	2	7	7	6	1.66667	0	1	0.857143	1	1	0.666667	11.0626	0.0001819	successful ranked
486	N-Acetylglutamic acid	LC-ESI-QTOF	negative	189.064	C7H11NO5	1	1	2	7	7	6	1.66667	0	1	0.857143	1	1	0.666667	11.0626	0.0001654	successful ranked
487	N-Acetylglutamic acid	LC-ESI-QTOF	positive	189.064	C7H11NO5	1	1	2	19	19	9	1.39744	0	1	0.692308	1	1	0.346154	7.88416	0.000367	successful ranked
488	5-Aminolevulinic acid	LC-ESI-QTOF (UPLC Q-Tof Premier; Waters)	positive	131.058	C5H9NO3	1	1	1	5	5	-1	0.999999	-1	-1	-1	-1	-1	-1	10.746	-1	Single candidate matches with the answer.
489	5-Aminolevulinic acid	LC-ESI-QTOF	positive	131.058	C5H9NO3	1	1	1	5	5	-1	0.999999	-1	-1	-1	-1	-1	-1	10.746	-1	Single candidate matches with the answer.
490	5'-Methylthioadenosine	LC-ESI-QTOF (UPLC Q-Tof Premier; Waters)	positive	297.09	C11H15N5O3S	5	6	6	3	3	0	2	1	0	0	0	1	0.666667	102.537	0.0003388	successful ranked
491	5'-Methylthioadenosine	LC-ESI-QTOF (UPLC Q-Tof Premier; Waters)	negative	297.09	C11H15N5O3S	1	2	6	3	3	2	2	0	0	0.666667	1	0	0	86.8108	0.0004446	successful ranked
492	5'-Methylthioadenosine	LC-ESI-QTOF	negative	297.09	C11H15N5O3S	1	2	6	3	3	2	2	0	0	0.666667	1	0	0	86.8108	0.0004163	successful ranked
493	5'-Methylthioadenosine	LC-ESI-QTOF	positive	297.09	C11H15N5O3S	5	6	6	3	3	0	2	1	0	0	0	1	0.666667	102.537	0.0003283	successful ranked
494	N1-Acetylspermine	LC-ESI-QTOF (UPLC Q-Tof Premier; Waters)	positive	244.226	C12H28N4O	1	1	1	6	6	-1	0.999997	-1	-1	-1	-1	-1	-1	26.2195	-1	Single candidate matches with the answer.
495	N1-Acetylspermine	LC-ESI-QTOF	positive	244.226	C12H28N4O	1	1	1	6	6	-1	0.999997	-1	-1	-1	-1	-1	-1	26.2195	-1	Single candidate matches with the answer.
496	Indoleacetaldehyde	LC-ESI-QTOF	negative	159.068	C10H9NO	1	2	4	3	3	2	2	0	0	0.666667	1	0	0	15.6135	0.0002987	successful ranked
497	Indoleacetaldehyde	LC-ESI-QTOF	positive	159.068	C10H9NO	2	2	4	10	10	6	1.42222	0	1	0.6	1	0	0.0222222	8.42356	0.0004505	successful ranked
498	Coumarin	LC-ESI-QTOF	positive	146.037	C9H6O2	1	2	5	4	2	1	2	0	0	0.5	1	0	0	0	0.00025	successful ranked
499	Coumarin	LC-ESI-QTOF	positive	146.037	C9H6O2	1	2	5	7	6	3	1.4	0	0	0.5	1	0	0	11.0357	0.0003879	successful ranked
500	Coumarin	LC-ESI-QTOF	positive	146.037	C9H6O2	1	1	5	12	11	6	1.30909	0	1	0.545455	1	1	0.0545455	6.56833	0.0005669	successful ranked
501	Coumarin	LC-ESI-QTOF	positive	146.037	C9H6O2	1	1	5	10	10	6	1.33333	0	1	0.6	1	1	0.155556	8.68705	0.0005348	successful ranked
502	Coumarin	LC-ESI-QTOF	positive	146.037	C9H6O2	1	2	5	5	6	2	1.13333	0	0	0.333333	1	0	0	9.78363	0.0003983	successful ranked
503	Coumarin	LC-ESI-QTOF	positive	146.037	C9H6O2	1	2	5	4	4	1	1.33333	0	0	0.333333	1	0	0	21.8124	0.0005217	successful ranked
504	5-Thymidylic acid	LC-ESI-QTOF (UPLC Q-Tof Premier; Waters)	negative	322.057	C10H15N2O8P	1	1	8	6	6	5	1.73333	0	1	0.833333	1	1	0.533333	45.288	0.0008938	successful ranked
505	5-Thymidylic acid	LC-ESI-QTOF	negative	322.057	C10H15N2O8P	1	1	8	6	6	5	1.73333	0	1	0.833333	1	1	0.533333	45.288	0.0009745	successful ranked
506	4-Nitrophenol	LC-ESI-QTOF (UPLC Q-Tof Premier; Waters)	positive	139.027	C6H5NO3	1	1	2	5	5	0	0.999999	-1	0	-1	-1	-1	-1	10.4171	0.0002154	No mother-daughter relation is found for all the precursor formula.
507	4-Nitrophenol	LC-ESI-QTOF (UPLC Q-Tof Premier; Waters)	negative	139.027	C6H5NO3	1	2	2	4	3	1	1.33333	0	0	0.333333	1	0	0	15.0089	0.0002327	successful ranked
508	4-Nitrophenol	LC-ESI-QTOF	negative	139.027	C6H5NO3	1	2	2	4	3	1	1.33333	0	0	0.333333	1	0	0	15.0089	0.0001764	successful ranked
509	4-Nitrophenol	LC-ESI-QTOF	positive	139.027	C6H5NO3	1	1	2	5	5	0	0.999999	-1	0	-1	-1	-1	-1	10.4171	0.0001483	No mother-daughter relation is found for all the precursor formula.
510	N-Acetylserotonin	LC-ESI-qTof	positive	218.106	C12H14N2O2	1	1	4	756	30	18	1.22906	0	1	0.62069	1	1	0.0862069	0.868439	0.000891	successful ranked
511	dCDP	LC-ESI-QTOF	negative	387.023	C9H15N3O10P2	1	1	5	8	8	4	1.42857	1	1	0.571429	1	1	0.285714	38.813	0.0004008	successful ranked
512	dCDP	LC-ESI-QTOF	positive	387.023	C9H15N3O10P2	1	2	5	5	4	2	1.66667	0	0	0.666667	1	0	0	130.454	0.0003637	successful ranked
513	dCDP	LC-ESI-QTOF	positive	387.023	C9H15N3O10P2	1	3	5	5	4	3	1.66667	0	0	0.75	1	0	0	130.427	0.0003351	successful ranked
514	Glucosamine 6-phosphate	LC-ESI-QTOF (UPLC Q-Tof Premier; Waters)	positive	259.046	C6H14NO8P	2	3	8	10	9	1	1.13333	0	0	0.166667	0	1	0.0666667	16.9957	0.0007827	successful ranked
515	Glucosamine 6-phosphate	LC-ESI-QTOF (UPLC Q-Tof Premier; Waters)	negative	259.046	C6H14NO8P	1	1	8	4	4	3	2	0	1	0.75	1	1	0.666667	45.4711	0.000503	successful ranked
516	Glucosamine 6-phosphate	LC-ESI-QTOF	negative	259.046	C6H14NO8P	1	1	8	4	4	3	2	0	1	0.75	1	1	0.666667	45.4711	0.0004539	successful ranked
517	Glucosamine 6-phosphate	LC-ESI-QTOF	positive	259.046	C6H14NO8P	2	3	8	10	9	1	1.13333	0	0	0.166667	0	1	0.0666667	16.9957	0.0007031	successful ranked
518	Spermine	LC-ESI-QTOF	positive	202.216	C10H26N4	1	1	1	3	3	-1	0.999997	-1	-1	-1	-1	-1	-1	38.8035	-1	Single candidate matches with the answer.
519	Spermine	LC-ESI-QTOF	positive	202.216	C10H26N4	1	1	1	5	6	-1	0.999997	-1	-1	-1	-1	-1	-1	25.9341	-1	Single candidate matches with the answer.
520	Spermine	LC-ESI-QTOF	positive	202.216	C10H26N4	1	1	1	6	7	-1	0.999997	-1	-1	-1	-1	-1	-1	25.8629	-1	Single candidate matches with the answer.
521	Spermine	LC-ESI-QTOF	positive	202.216	C10H26N4	1	1	1	11	10	-1	0.999997	-1	-1	-1	-1	-1	-1	25.9154	-1	Single candidate matches with the answer.
522	Spermidine	LC-ESI-QTOF	positive	145.158	C7H19N3	1	1	1	9	8	-1	0.999998	-1	-1	-1	-1	-1	-1	8.83414	-1	Single candidate matches with the answer.
523	Spermidine	LC-ESI-QTOF	positive	145.158	C7H19N3	1	1	1	11	10	-1	0.999998	-1	-1	-1	-1	-1	-1	6.49876	-1	Single candidate matches with the answer.
524	Spermidine	LC-ESI-QTOF	positive	145.158	C7H19N3	1	1	1	13	13	-1	0.999998	-1	-1	-1	-1	-1	-1	8.45285	-1	Single candidate matches with the answer.
525	Spermidine	LC-ESI-QTOF	positive	145.158	C7H19N3	1	1	1	19	20	-1	0.999998	-1	-1	-1	-1	-1	-1	7.45268	-1	Single candidate matches with the answer.
526	Maltotriose	LC-ESI-QTOF (UPLC Q-Tof Premier; Waters)	negative	504.169	C18H32O16	1	1	11	25	25	15	1.40316	0	1	0.652174	0	1	0.0316206	18.8229	0.0018137	successful ranked
527	Maltotriose	LC-ESI-QTOF (UPLC Q-Tof Premier; Waters)	negative	504.169	C18H32O16	2	2	11	25	25	18	1.56	0	1	0.72	0	1	0.06	20.9386	0.0020286	successful ranked
528	dTDP	LC-ESI-QTOF	negative	402.023	C10H16N2O11P2	1	1	9	11	11	7	1.38182	0	1	0.636364	1	1	0.2	33.7526	0.0009276	successful ranked
529	Cyclic GMP	LC-ESI-QTOF	negative	345.047	C10H12N5O7P	5	7	8	7	7	1	1.2	1	0	0.166667	0	0	0	69.4478	0.0007871	successful ranked
530	Cyclic GMP	LC-ESI-QTOF	positive	345.047	C10H12N5O7P	6	8	8	3	3	0	2	1	0	0	0	0	0	125.137	0.0004744	successful ranked
531	D-Erythrose 4-phosphate	LC-ESI-QTOF	negative	200.009	C4H9O7P	1	1	4	5	5	3	2	0	1	0.75	1	1	0.833333	18.7419	0.0002819	successful ranked
532	ADP	LC-ESI-QTOF (UPLC Q-Tof Premier; Waters)	negative	427.029	C10H15N5O10P2	1	1	4	4	4	2	1.5	1	1	0.5	1	1	0.333333	122.313	0.0002352	successful ranked
533	ADP	LC-ESI-QTOF	negative	427.029	C10H15N5O10P2	1	1	4	4	4	2	1.5	1	1	0.5	1	1	0.333333	122.313	0.0002206	successful ranked
534	Melatonin	LC-ESI-qTof	positive	232.121	C13H16N2O2	1	1	3	1000	30	14	1.16502	0	1	0.482759	1	0	0.0689655	0.501771	0.0006163	successful ranked
535	Melatonin	LC-ESI-QTOF	negative	232.121	C13H16N2O2	1	1	3	12	11	2	1.2	0	1	0.333333	1	0	0.0666667	21.3648	0.0003158	successful ranked
536	Melatonin	LC-ESI-QTOF	negative	232.121	C13H16N2O2	1	1	3	21	21	5	1.19697	0	1	0.416667	1	1	0.0909091	14.0271	0.0004238	successful ranked
537	Melatonin	LC-ESI-QTOF	negative	232.121	C13H16N2O2	1	1	3	10	11	4	1.28571	0	1	0.5	1	0	0.0714286	26.7162	0.0003562	successful ranked
538	Melatonin	LC-ESI-QTOF	positive	232.121	C13H16N2O2	1	1	3	21	21	7	1.225	0	1	0.4375	1	1	0.133333	7.4292	0.0004559	successful ranked
539	Melatonin	LC-ESI-QTOF	positive	232.121	C13H16N2O2	1	1	3	22	23	8	1.17544	0	1	0.421053	0	1	0.0467836	9.92089	0.0005033	successful ranked
540	Melatonin	LC-ESI-QTOF	positive	232.121	C13H16N2O2	1	1	3	24	25	10	1.22222	0	1	0.555556	1	1	0.0522876	12.3721	0.0005598	successful ranked
541	p-Aminobenzoic acid	LC-ESI-QTOF (UPLC Q-Tof Premier; Waters)	positive	137.048	C7H7NO2	1	1	2	3	3	0	0.999999	-1	0	-1	-1	-1	-1	19.0646	0	No mother-daughter relation is found for all the precursor formula.
542	p-Aminobenzoic acid	LC-ESI-QTOF	positive	137.048	C7H7NO2	1	1	2	3	3	0	0.999999	-1	0	-1	-1	-1	-1	19.0646	0	No mother-daughter relation is found for all the precursor formula.
543	Guanosine monophosphate	LC-ESI-QTOF (UPLC Q-Tof Premier; Waters)	positive	363.058	C10H14N5O8P	10	10	10	5	5	0	1.6	1	1	0	0	0	0.1	96.9609	0.0007401	successful ranked
544	Guanosine monophosphate	LC-ESI-QTOF (UPLC Q-Tof Premier; Waters)	negative	363.058	C10H14N5O8P	3	4	10	6	6	2	1.26667	1	0	0.333333	0	1	0.0666667	54.9341	0.0007656	successful ranked
545	Guanosine monophosphate	LC-ESI-QTOF (UPLC Q-Tof Premier; Waters)	negative	363.058	C10H14N5O8P	2	2	10	6	6	2	1.26667	1	1	0.333333	0	1	0.0666667	54.9336	0.000636	successful ranked
546	Guanosine monophosphate	LC-ESI-QTOF	negative	363.058	C10H14N5O8P	3	4	10	6	6	2	1.26667	1	0	0.333333	0	1	0.0666667	54.9341	0.0006461	successful ranked
547	Guanosine monophosphate	LC-ESI-QTOF	negative	363.058	C10H14N5O8P	2	2	10	6	6	2	1.26667	1	1	0.333333	0	1	0.0666667	54.9336	0.0006162	successful ranked
548	Guanosine monophosphate	LC-ESI-QTOF	positive	363.058	C10H14N5O8P	10	10	10	5	5	0	1.6	1	1	0	0	0	0.1	96.9609	0.0007074	successful ranked
549	Glucose 6-phosphate	LC-ESI-QTOF (UPLC Q-Tof Premier; Waters)	negative	260.03	C6H13O9P	1	1	5	4	4	3	2	0	1	0.75	1	1	0.5	52.8954	0.0003495	successful ranked
550	Glucose 6-phosphate	LC-ESI-QTOF	negative	260.03	C6H13O9P	1	1	5	4	4	3	2	0	1	0.75	1	1	0.5	52.8954	0.000314	successful ranked
551	Niacinamide	LC-ESI-QTOF (UPLC Q-Tof Premier; Waters)	positive	122.048	C6H6N2O	1	1	1	4	4	-1	0.999999	-1	-1	-1	-1	-1	-1	12.5264	-1	Single candidate matches with the answer.
552	Niacinamide	LC-ESI-QTOF (UPLC Q-Tof Premier; Waters)	positive	122.048	C6H6N2O	1	1	1	5	5	-1	0.999999	-1	-1	-1	-1	-1	-1	12.658	-1	Single candidate matches with the answer.
553	Niacinamide	LC-ESI-QTOF (UPLC Q-Tof Premier; Waters)	positive	122.048	C6H6N2O	1	1	1	4	4	-1	0.999999	-1	-1	-1	-1	-1	-1	12.5257	-1	Single candidate matches with the answer.
554	Niacinamide	LC-ESI-QTOF (UPLC Q-Tof Premier; Waters)	positive	122.048	C6H6N2O	1	1	1	5	5	-1	0.999999	-1	-1	-1	-1	-1	-1	12.6586	-1	Single candidate matches with the answer.
555	Niacinamide	LC-ESI-QTOF	positive	122.048	C6H6N2O	1	1	1	4	4	-1	0.999999	-1	-1	-1	-1	-1	-1	12.5264	-1	Single candidate matches with the answer.
556	Niacinamide	LC-ESI-QTOF	positive	122.048	C6H6N2O	1	1	1	5	5	-1	0.999999	-1	-1	-1	-1	-1	-1	12.658	-1	Single candidate matches with the answer.
557	Niacinamide	LC-ESI-QTOF	positive	122.048	C6H6N2O	1	1	1	4	4	-1	0.999999	-1	-1	-1	-1	-1	-1	12.5257	-1	Single candidate matches with the answer.
558	Niacinamide	LC-ESI-QTOF	positive	122.048	C6H6N2O	1	1	1	5	5	-1	0.999999	-1	-1	-1	-1	-1	-1	12.6586	-1	Single candidate matches with the answer.
559	dUMP	LC-ESI-QTOF (UPLC Q-Tof Premier; Waters)	negative	308.041	C9H13N2O8P	1	1	8	6	6	3	1.26667	1	1	0.5	1	0	0.0666667	42.6131	0.0005654	successful ranked
560	dUMP	LC-ESI-QTOF	negative	308.041	C9H13N2O8P	1	1	8	6	6	3	1.26667	1	1	0.5	1	0	0.0666667	42.6131	0.0004821	successful ranked
561	Citicoline	LC-ESI-QTOF (UPLC Q-Tof Premier; Waters)	positive	488.107	C14H26N4O11P2	2	3	10	4	4	3	1.66667	0	0	0.75	1	0	0	49.9414	0.0005948	successful ranked
562	Citicoline	LC-ESI-QTOF (UPLC Q-Tof Premier; Waters)	positive	488.107	C14H26N4O11P2	5	5	10	8	8	3	1.5	1	1	0.375	0	1	0.107143	39.3978	0.0008596	successful ranked
563	Citicoline	LC-ESI-QTOF (UPLC Q-Tof Premier; Waters)	negative	488.107	C14H26N4O11P2	1	1	10	9	9	6	1.47222	1	1	0.666667	1	1	0.0555556	59.0372	0.0008392	successful ranked
564	Citicoline	LC-ESI-QTOF (UPLC Q-Tof Premier; Waters)	negative	488.107	C14H26N4O11P2	1	1	10	9	9	6	1.55556	1	1	0.666667	1	0	0.194444	59.0372	0.0008576	successful ranked
565	Citicoline	LC-ESI-QTOF	negative	488.107	C14H26N4O11P2	1	1	10	9	9	6	1.47222	1	1	0.666667	1	1	0.0555556	59.0372	0.0008102	successful ranked
566	Citicoline	LC-ESI-QTOF	negative	488.107	C14H26N4O11P2	1	1	10	9	9	6	1.55556	1	1	0.666667	1	0	0.194444	59.0372	0.0010726	successful ranked
567	Citicoline	LC-ESI-QTOF	positive	488.107	C14H26N4O11P2	2	3	10	4	4	3	1.66667	0	0	0.75	1	0	0	49.9414	0.0006294	successful ranked
568	Citicoline	LC-ESI-QTOF	positive	488.107	C14H26N4O11P2	5	5	10	8	8	3	1.5	1	1	0.375	0	1	0.107143	39.3978	0.0009685	successful ranked
569	Pyridoxamine	LC-ESI-QTOF (UPLC Q-Tof Premier; Waters)	positive	168.09	C8H12N2O2	1	1	1	4	3	-1	0.999999	-1	-1	-1	-1	-1	-1	10.0763	-1	Single candidate matches with the answer.
570	Pyridoxamine	LC-ESI-QTOF (UPLC Q-Tof Premier; Waters)	negative	168.09	C8H12N2O2	1	1	1	12	11	-1	0.999999	-1	-1	-1	-1	-1	-1	5.9253	-1	Single candidate matches with the answer.
571	Pyridoxamine	LC-ESI-QTOF	negative	168.09	C8H12N2O2	1	1	1	12	11	-1	0.999999	-1	-1	-1	-1	-1	-1	5.9253	-1	Single candidate matches with the answer.
572	Pyridoxamine	LC-ESI-QTOF	positive	168.09	C8H12N2O2	1	1	1	4	3	-1	0.999999	-1	-1	-1	-1	-1	-1	10.0763	-1	Single candidate matches with the answer.
573	Agmatine	LC-ESI-QTOF (UPLC Q-Tof Premier; Waters)	positive	130.122	C5H14N4	1	1	1	6	6	-1	0.999998	-1	-1	-1	-1	-1	-1	9.12494	-1	Single candidate matches with the answer.
574	Agmatine	LC-ESI-QTOF	positive	130.122	C5H14N4	1	1	1	3	2	-1	0.999998	-1	-1	-1	-1	-1	-1	12.0393	-1	Single candidate matches with the answer.
575	Agmatine	LC-ESI-QTOF	positive	130.122	C5H14N4	1	1	1	6	6	-1	0.999998	-1	-1	-1	-1	-1	-1	9.12494	-1	Single candidate matches with the answer.
576	3-Hydroxyanthranilic acid	LC-ESI-qTof	positive	153.043	C7H7NO3	2	2	2	122	32	1	1.01307	0	1	0.0555556	0	1	0.00653595	1.65195	0.0004339	successful ranked
577	3-Hydroxyanthranilic acid	LC-ESI-QTOF	negative	153.043	C7H7NO3	1	1	2	4	3	1	2	0	1	0.5	1	1	1	29.6868	0.0001382	successful ranked
578	3-Hydroxyanthranilic acid	LC-ESI-QTOF	negative	153.043	C7H7NO3	1	1	2	5	5	3	2	0	1	0.75	1	1	0.5	19.7969	0.0002388	successful ranked
579	3-Hydroxyanthranilic acid	LC-ESI-QTOF	negative	153.043	C7H7NO3	1	1	2	4	5	3	1.6	0	1	0.6	1	1	0.3	19.7961	0.0001719	successful ranked
580	3-Hydroxyanthranilic acid	LC-ESI-QTOF	negative	153.043	C7H7NO3	1	1	2	3	4	3	2	0	1	0.75	1	1	0.5	21.8144	0.0001493	successful ranked
581	3-Hydroxyanthranilic acid	LC-ESI-QTOF	positive	153.043	C7H7NO3	1	2	2	6	5	3	1.6	0	0	0.6	1	0	0	6.67404	0.000163	successful ranked
582	3-Hydroxyanthranilic acid	LC-ESI-QTOF	positive	153.043	C7H7NO3	1	2	2	5	6	3	1.4	0	0	0.5	1	0	0	11.8599	0.0002216	successful ranked
583	3-Hydroxyanthranilic acid	LC-ESI-QTOF	positive	153.043	C7H7NO3	1	2	2	7	8	4	1.6	0	0	0.666667	1	0	0	9.80579	0.0002142	successful ranked
584	3-Hydroxyanthranilic acid	LC-ESI-QTOF	positive	153.043	C7H7NO3	1	1	2	7	8	4	1.47619	0	1	0.571429	1	1	0.190476	10.1095	0.0005599	successful ranked
585	Nicotinic acid	LC-ESI-QTOF	positive	123.032	C6H5NO2	1	1	2	6	5	4	1.8	0	1	0.8	1	1	0.7	7.18424	0.0001864	successful ranked
586	Nicotinic acid	LC-ESI-QTOF	positive	123.032	C6H5NO2	1	1	2	11	9	6	1.53571	0	1	0.75	1	1	0.392857	6.59865	0.0002381	successful ranked
587	Nicotinic acid	LC-ESI-QTOF	positive	123.032	C6H5NO2	1	1	2	7	7	4	1.66667	0	1	0.666667	1	1	0.6	10.9962	0.000193	successful ranked
588	Nicotinic acid	LC-ESI-QTOF	positive	123.032	C6H5NO2	1	1	2	6	7	4	1.66667	0	1	0.666667	1	1	0.6	10.9962	0.0002175	successful ranked
589	Pyridoxal 5'-phosphate	LC-ESI-QTOF (UPLC Q-Tof Premier; Waters)	positive	247.025	C8H10NO6P	1	1	6	5	5	4	2	0	1	0.8	1	1	0.4	35.1577	0.0005373	successful ranked
590	Pyridoxal 5'-phosphate	LC-ESI-QTOF (UPLC Q-Tof Premier; Waters)	positive	247.025	C8H10NO6P	1	1	6	5	5	4	2	0	1	0.8	1	1	0.4	35.1575	0.0004735	successful ranked
591	Pyridoxal 5'-phosphate	LC-ESI-QTOF (UPLC Q-Tof Premier; Waters)	negative	247.025	C8H10NO6P	1	2	6	3	3	2	2	0	0	0.666667	1	0	0	81.3533	0.0003061	successful ranked
592	Pyridoxal 5'-phosphate	LC-ESI-QTOF (UPLC Q-Tof Premier; Waters)	negative	247.025	C8H10NO6P	1	2	6	3	3	2	2	0	0	0.666667	1	0	0	81.3532	0.0002856	successful ranked
593	Pyridoxal 5'-phosphate	LC-ESI-QTOF	negative	247.025	C8H10NO6P	1	2	6	3	3	2	2	0	0	0.666667	1	0	0	81.3533	0.0003086	successful ranked
594	Pyridoxal 5'-phosphate	LC-ESI-QTOF	negative	247.025	C8H10NO6P	1	2	6	3	3	2	2	0	0	0.666667	1	0	0	81.3532	0.0002873	successful ranked
595	Pyridoxal 5'-phosphate	LC-ESI-QTOF	positive	247.025	C8H10NO6P	1	1	6	5	5	4	2	0	1	0.8	1	1	0.4	35.1577	0.0004664	successful ranked
596	Pyridoxal 5'-phosphate	LC-ESI-QTOF	positive	247.025	C8H10NO6P	1	1	6	5	5	4	2	0	1	0.8	1	1	0.4	35.1575	0.000432	successful ranked
597	AICAR	LC-ESI-QTOF	negative	338.063	C9H15N4O8P	2	2	10	4	4	2	1.66667	1	1	0.5	0	1	0.166667	99.0063	0.0005396	successful ranked
598	AICAR	LC-ESI-QTOF	positive	338.063	C9H15N4O8P	9	10	10	5	5	0	1.6	1	0	0	0	1	0.3	56.9964	0.0007327	successful ranked
599	Flavin Mononucleotide	LC-ESI-QTOF (UPLC Q-Tof Premier; Waters)	negative	456.105	C17H21N4O9P	2	5	10	5	4	1	1.33333	1	0	0.333333	1	0	0	101.587	0.000715	successful ranked
600	Flavin Mononucleotide	LC-ESI-QTOF	negative	456.105	C17H21N4O9P	2	5	10	5	4	1	1.33333	1	0	0.333333	1	0	0	101.587	0.0006809	successful ranked
601	Pyridoxal	LC-ESI-QTOF (UPLC Q-Tof Premier; Waters)	positive	167.058	C8H9NO3	1	1	2	6	6	5	2	0	1	0.833333	1	1	0.6	7.01473	0.0002602	successful ranked
602	Pyridoxal	LC-ESI-QTOF (UPLC Q-Tof Premier; Waters)	negative	167.058	C8H9NO3	1	1	2	4	4	3	2	0	1	0.75	1	1	0.833333	15.603	0.0001869	successful ranked
603	Pyridoxal	LC-ESI-QTOF	negative	167.058	C8H9NO3	1	1	2	4	4	3	2	0	1	0.75	1	1	0.833333	15.603	0.0001538	successful ranked
604	Pyridoxal	LC-ESI-QTOF	positive	167.058	C8H9NO3	1	1	2	6	6	5	2	0	1	0.833333	1	1	0.6	7.01473	0.0002004	successful ranked
605	CDP	LC-ESI-QTOF	negative	403.018	C9H15N3O11P2	1	1	7	6	6	4	1.53333	0	1	0.666667	1	0	0.133333	52.4164	0.0005644	successful ranked
606	CDP	LC-ESI-QTOF	positive	403.018	C9H15N3O11P2	6	7	7	3	3	0	1.33333	0	0	0	0	0	0	187.531	0.0004249	successful ranked
607	CDP	LC-ESI-QTOF	positive	403.018	C9H15N3O11P2	6	7	7	9	7	1	1.13333	1	0	0.166667	0	0	0	54.5191	0.0006859	successful ranked
608	Corticosterone	LC-ESI-qTof	positive	346.214	C21H30O4	1	1	4	262	30	19	1.4416	0	1	0.703704	1	1	0.301994	2.50512	0.0008767	successful ranked
609	Corticosterone	LC-ESI-qTof	positive	346.214	C21H30O4	1	1	4	1084	30	22	1.44974	0	1	0.785714	1	1	0.230159	0.652319	0.0008492	successful ranked
610	Corticosterone	LC-ESI-QTOF	positive	346.214	C21H30O4	1	1	4	7	5	0	0.999997	-1	0	-1	-1	-1	-1	8.34932	0.0002025	No mother-daughter relation is found for all the precursor formula.
611	Corticosterone	LC-ESI-QTOF	positive	346.214	C21H30O4	1	1	4	138	30	20	1.35862	0	1	0.666667	1	1	0.0965517	2.22094	0.0007505	successful ranked
612	Corticosterone	LC-ESI-QTOF	positive	346.214	C21H30O4	1	1	4	187	30	24	1.53202	0	1	0.827586	1	1	0.125616	1.87588	0.0008587	successful ranked
613	Corticosterone	LC-ESI-QTOF	positive	346.214	C21H30O4	1	1	4	166	30	28	1.5954	0	1	0.933333	1	1	0.25977	2.20461	0.0007826	successful ranked
614	Corticosterone	LC-ESI-QTOF	positive	346.214	C21H30O4	1	1	4	106	30	28	1.63678	0	1	0.933333	1	1	0.245977	6.37575	0.0008258	successful ranked
615	D-Ribose 5-phosphate	LC-ESI-QTOF (UPLC Q-Tof Premier; Waters)	negative	230.019	C5H11O8P	1	1	5	4	4	3	2	0	1	0.75	1	1	0.666667	39.0126	0.0003444	successful ranked
616	D-Ribose 5-phosphate	LC-ESI-QTOF	negative	230.019	C5H11O8P	1	1	5	4	4	3	2	0	1	0.75	1	1	0.666667	39.0126	0.0002944	successful ranked
617	Xanthylic acid	LC-ESI-QTOF	negative	364.042	C10H13N4O9P	2	2	7	7	7	3	1.33333	1	1	0.428571	0	1	0.047619	52.7576	0.0005439	successful ranked
618	Xanthylic acid	LC-ESI-QTOF	positive	364.042	C10H13N4O9P	5	5	7	8	8	2	1.53333	1	1	0.333333	0	0	0.133333	51.7341	0.0006562	successful ranked
619	Phosphorylcholine	LC-ESI-QTOF (UPLC Q-Tof Premier; Waters)	positive	184.074	C5H15NO4P	1	1	3	5	5	4	1.6	0	1	0.8	1	1	0.5	22.1343	0.0002071	successful ranked
620	Phosphorylcholine	LC-ESI-QTOF (UPLC Q-Tof Premier; Waters)	negative	184.074	C5H15NO4P	1	1	3	8	8	0	1	-1	0	-1	-1	-1	-1	31.759	0	No mother-daughter relation is found for all the precursor formula.
621	Phosphorylcholine	LC-ESI-QTOF	negative	184.074	C5H15NO4P	1	1	3	8	8	0	1	-1	0	-1	-1	-1	-1	31.759	0	No mother-daughter relation is found for all the precursor formula.
622	Phosphorylcholine	LC-ESI-QTOF	positive	184.074	C5H15NO4P	1	1	3	5	5	4	1.6	0	1	0.8	1	1	0.5	22.1343	0.0002112	successful ranked
623	L-Norleucine	LC-ESI-QTOF (UPLC Q-Tof Premier; Waters)	positive	131.095	C6H13NO2	1	1	1	6	6	-1	0.999999	-1	-1	-1	-1	-1	-1	6.37282	-1	Single candidate matches with the answer.
624	L-Norleucine	LC-ESI-QTOF (UPLC Q-Tof Premier; Waters)	positive	131.095	C6H13NO2	1	1	1	6	7	-1	0.999999	-1	-1	-1	-1	-1	-1	6.17014	-1	Single candidate matches with the answer.
625	L-Norleucine	LC-ESI-QTOF (UPLC Q-Tof Premier; Waters)	negative	131.095	C6H13NO2	1	1	1	3	2	-1	0.999999	-1	-1	-1	-1	-1	-1	32.5293	-1	Single candidate matches with the answer.
626	L-Norleucine	LC-ESI-QTOF	negative	131.095	C6H13NO2	1	1	1	3	2	-1	0.999999	-1	-1	-1	-1	-1	-1	32.5293	-1	Single candidate matches with the answer.
627	L-Norleucine	LC-ESI-QTOF	positive	131.095	C6H13NO2	1	1	1	6	6	-1	0.999999	-1	-1	-1	-1	-1	-1	6.37282	-1	Single candidate matches with the answer.
628	L-Norleucine	LC-ESI-QTOF	positive	131.095	C6H13NO2	1	1	1	6	7	-1	0.999999	-1	-1	-1	-1	-1	-1	6.17014	-1	Single candidate matches with the answer.
629	Progesterone	LC-ESI-qTof	positive	314.225	C21H30O2	1	1	1	342	30	-1	0.999998	-1	-1	-1	-1	-1	-1	1.47161	-1	Single candidate matches with the answer.
630	Progesterone	LC-ESI-qTof	positive	314.225	C21H30O2	1	1	1	257	30	-1	0.999998	-1	-1	-1	-1	-1	-1	3.2188	-1	Single candidate matches with the answer.
631	Progesterone	LC-ESI-qTof	positive	314.225	C21H30O2	1	1	1	957	30	-1	0.999998	-1	-1	-1	-1	-1	-1	0.524106	-1	Single candidate matches with the answer.
632	Progesterone	LC-ESI-QTOF	positive	314.225	C21H30O2	1	1	1	122	30	-1	0.999998	-1	-1	-1	-1	-1	-1	2.6799	-1	Single candidate matches with the answer.
633	Progesterone	LC-ESI-QTOF	positive	314.225	C21H30O2	1	1	1	50	30	-1	0.999998	-1	-1	-1	-1	-1	-1	4.50689	-1	Single candidate matches with the answer.
634	Progesterone	LC-ESI-QTOF	positive	314.225	C21H30O2	1	1	1	137	30	-1	0.999998	-1	-1	-1	-1	-1	-1	2.1465	-1	Single candidate matches with the answer.
635	Progesterone	LC-ESI-QTOF	positive	314.225	C21H30O2	1	1	1	100	30	-1	0.999998	-1	-1	-1	-1	-1	-1	3.43761	-1	Single candidate matches with the answer.
636	Progesterone	LC-ESI-QTOF	positive	314.225	C21H30O2	1	1	1	74	30	-1	0.999998	-1	-1	-1	-1	-1	-1	5.15926	-1	Single candidate matches with the answer.
637	Progesterone	LC-ESI-QTOF	positive	314.225	C21H30O2	1	1	1	4	2	-1	0.999998	-1	-1	-1	-1	-1	-1	0	-1	Single candidate matches with the answer.
638	Caffeine	LC-ESI-qTof	positive	194.08	C8H10N4O2	1	1	2	101	31	7	1.1978	1	1	0.5	1	1	0.175824	2.74122	0.0003971	successful ranked
639	Caffeine	LC-ESI-QTOF	positive	194.08	C8H10N4O2	1	1	2	3	2	0	0.999998	-1	0	-1	-1	-1	-1	0	0.0001039	No mother-daughter relation is found for all the precursor formula.
640	Caffeine	LC-ESI-QTOF	positive	194.08	C8H10N4O2	2	2	2	5	4	0	1.16667	1	1	0	0	1	0.166667	26.557	0.0001326	successful ranked
641	Caffeine	LC-ESI-QTOF	positive	194.08	C8H10N4O2	1	2	2	9	8	1	1.04762	1	0	0.142857	1	0	0	19.3341	0.0002349	successful ranked
642	Caffeine	LC-ESI-QTOF	positive	194.08	C8H10N4O2	1	1	2	18	18	5	1.10833	1	1	0.3125	1	1	0.0916667	10.0204	0.0002783	successful ranked
643	Caffeine	LC-ESI-QTOF	positive	194.08	C8H10N4O2	1	1	2	15	16	4	1.05714	1	1	0.266667	1	1	0.0285714	14.3041	0.0003058	successful ranked
644	Caffeine	LC-ESI-QTOF	positive	194.08	C8H10N4O2	1	1	2	5	5	2	2	0	1	0.666667	1	1	1	25.3827	0.0001618	successful ranked
645	Caffeine	LC-ESI-QTOF	positive	194.08	C8H10N4O2	1	1	2	14	14	5	1.24444	1	1	0.5	1	1	0.222222	15.3956	0.0002433	successful ranked
646	Caffeine	LC-ESI-QTOF	positive	194.08	C8H10N4O2	2	2	2	6	7	2	1.14286	1	1	0.285714	1	0	0.047619	21.8354	0.000199	successful ranked
647	Imipramine	LC-ESI-QTOF	positive	280.194	C19H24N2	2	2	5	11	10	5	1.64286	0	1	0.625	0	1	0.142857	33.1432	0.0005144	successful ranked
648	Propranolol	LC-ESI-QTOF	positive	259.157	C16H21NO2	1	1	3	43	30	22	1.28571	0	1	0.758621	1	1	0.0566502	7.05278	0.000696	successful ranked
649	Verapamil	LC-ESI-QTOF	positive	454.283	C27H38N2O4	1	1	3	5	3	2	2	0	1	0.666667	1	1	1	9.87717	0.0001893	successful ranked
650	Verapamil	LC-ESI-QTOF	positive	454.283	C27H38N2O4	1	1	3	8	6	3	1.4	0	1	0.5	1	1	0.333333	64.5882	0.000283	successful ranked
651	Verapamil	LC-ESI-QTOF	positive	454.283	C27H38N2O4	1	1	3	12	10	6	1.35556	0	1	0.6	1	1	0.311111	51.1792	0.0005589	successful ranked
652	Verapamil	LC-ESI-QTOF	positive	454.283	C27H38N2O4	1	1	3	8	9	5	1.41667	0	1	0.555556	1	1	0.388889	54.7806	0.0005352	successful ranked
653	Verapamil	LC-ESI-QTOF	positive	454.283	C27H38N2O4	1	1	3	20	21	12	1.28571	0	1	0.571429	1	1	0.247619	34.4058	0.0005316	successful ranked
654	Verapamil	LC-ESI-QTOF	positive	454.283	C27H38N2O4	1	1	3	4	4	0	0.999996	-1	0	-1	-1	-1	-1	79.8762	0.000155	No mother-daughter relation is found for all the precursor formula.
655	Verapamil	LC-ESI-QTOF	positive	454.283	C27H38N2O4	1	1	3	22	22	10	1.12857	0	1	0.47619	1	1	0.0571429	34.4508	0.0005016	successful ranked
656	Verapamil	LC-ESI-QTOF	positive	454.283	C27H38N2O4	1	1	3	37	30	16	1.21149	0	1	0.533333	1	1	0.190805	25.6175	0.0005215	successful ranked
657	Protocatechuic acid	LC-ESI-QTOF (UPLC Q-Tof Premier; Waters)	negative	154.027	C7H6O4	1	3	3	3	3	2	2	0	0	0.666667	1	0	0	25.1111	0.0002367	successful ranked
658	Protocatechuic acid	LC-ESI-QTOF	negative	154.027	C7H6O4	1	3	3	3	3	2	2	0	0	0.666667	1	0	0	25.1111	0.0002747	successful ranked
659	Acetaminophen	LC-ESI-QTOF	positive	151.063	C8H9NO2	1	1	2	20	19	11	1.28758	0	1	0.611111	1	0	0.104575	5.56181	0.0003416	successful ranked
660	Paraxanthine	LC-ESI-QTOF (UPLC Q-Tof Premier; Waters)	positive	180.065	C7H8N4O2	1	1	2	9	9	2	1.14286	0	1	0.285714	1	1	0.0952381	10.0862	0.0002581	successful ranked
661	Paraxanthine	LC-ESI-QTOF (UPLC Q-Tof Premier; Waters)	negative	180.065	C7H8N4O2	1	1	2	10	8	3	1.4	0	1	0.5	1	1	0.333333	9.37577	0.0001975	successful ranked
662	Paraxanthine	LC-ESI-qTof	positive	180.065	C7H8N4O2	1	1	2	32	20	2	1.08333	0	1	0.222222	1	1	0.0555556	6.43375	0.0003407	successful ranked
663	Paraxanthine	LC-ESI-QTOF	negative	180.065	C7H8N4O2	1	1	2	10	8	3	1.4	0	1	0.5	1	1	0.333333	9.37577	0.0001948	successful ranked
664	Paraxanthine	LC-ESI-QTOF	positive	180.065	C7H8N4O2	1	1	2	9	9	2	1.14286	0	1	0.285714	1	1	0.0952381	10.0862	0.00019	successful ranked
665	2-Hydroxyvaleric acid	LC-ESI-QTOF	negative	118.063	C5H10O3	1	1	1	3	2	-1	0.999999	-1	-1	-1	-1	-1	-1	26.4519	-1	Single candidate matches with the answer.
666	3*4-Dihydroxymandelic acid	LC-ESI-QTOF (UPLC Q-Tof Premier; Waters)	positive	184.037	C8H8O5	1	1	4	7	7	0	0.999999	-1	0	-1	-1	-1	-1	16.4934	0	No mother-daughter relation is found for all the precursor formula.
667	3*4-Dihydroxymandelic acid	LC-ESI-QTOF (UPLC Q-Tof Premier; Waters)	negative	184.037	C8H8O5	1	3	4	3	3	2	2	0	0	0.666667	1	0	0	24.8357	0.0003218	successful ranked
668	3*4-Dihydroxymandelic acid	LC-ESI-QTOF	negative	184.037	C8H8O5	1	3	4	3	3	2	2	0	0	0.666667	1	0	0	24.8357	0.0003155	successful ranked
669	3*4-Dihydroxymandelic acid	LC-ESI-QTOF	positive	184.037	C8H8O5	1	1	4	7	7	0	0.999999	-1	0	-1	-1	-1	-1	16.4934	0	No mother-daughter relation is found for all the precursor formula.
670	Epicatechin	LC-ESI-QTOF (UPLC Q-Tof Premier; Waters)	positive	290.079	C15H14O6	1	1	8	12	2	0	0.999998	-1	0	-1	-1	-1	-1	8.66103	0.0002791	No mother-daughter relation is found for all the precursor formula.
671	Epicatechin	LC-ESI-QTOF (UPLC Q-Tof Premier; Waters)	positive	290.079	C15H14O6	1	1	8	5	5	4	1.9	0	1	0.8	1	1	0.6	56.18	0.0005195	successful ranked
672	Epicatechin	LC-ESI-QTOF (UPLC Q-Tof Premier; Waters)	negative	290.079	C15H14O6	1	1	8	26	26	23	1.65231	0	1	0.884615	1	1	0.381538	9.6562	0.0013397	successful ranked
673	Epicatechin	LC-ESI-QTOF	negative	290.079	C15H14O6	1	5	8	4	2	1	2	0	0	0.5	1	0	0	0	0.0003501	successful ranked
674	Epicatechin	LC-ESI-QTOF	negative	290.079	C15H14O6	1	1	8	28	26	22	1.63385	0	1	0.846154	1	1	0.452308	6.97574	0.0013937	successful ranked
675	Epicatechin	LC-ESI-QTOF	negative	290.079	C15H14O6	1	1	8	32	30	29	1.77471	0	1	0.966667	1	1	0.581609	8.67745	0.0014412	successful ranked
676	Epicatechin	LC-ESI-QTOF	negative	290.079	C15H14O6	1	1	8	31	30	28	1.63908	0	1	0.933333	1	1	0.441379	12.3483	0.0014785	successful ranked
677	Epicatechin	LC-ESI-QTOF	negative	290.079	C15H14O6	1	1	8	19	20	17	1.55789	0	1	0.85	1	1	0.294737	20.0633	0.0011391	successful ranked
678	Epicatechin	LC-ESI-QTOF	negative	290.079	C15H14O6	1	1	8	26	26	23	1.65231	0	1	0.884615	1	1	0.381538	9.6562	0.0015045	successful ranked
679	Epicatechin	LC-ESI-QTOF	positive	290.079	C15H14O6	1	1	8	15	13	9	1.52564	0	1	0.692308	1	0	0.179487	14.249	0.0015971	successful ranked
680	Epicatechin	LC-ESI-QTOF	positive	290.079	C15H14O6	1	1	8	22	22	16	1.49351	0	1	0.727273	1	0	0.190476	9.90681	0.0020901	successful ranked
681	Epicatechin	LC-ESI-QTOF	positive	290.079	C15H14O6	1	1	8	24	25	18	1.42667	0	1	0.72	0	1	0.09	16.6992	0.0022245	successful ranked
682	Epicatechin	LC-ESI-QTOF	positive	290.079	C15H14O6	1	1	8	26	27	22	1.51282	0	1	0.814815	1	1	0.145299	16.1999	0.0014372	successful ranked
683	Epicatechin	LC-ESI-QTOF	positive	290.079	C15H14O6	1	1	8	24	25	20	1.47	0	1	0.8	1	0	0.24	20.6797	0.0013428	successful ranked
684	Epicatechin	LC-ESI-QTOF	positive	290.079	C15H14O6	3	3	8	15	13	5	1.20513	0	1	0.384615	0	1	0.025641	12.2464	0.0008422	successful ranked
685	Epicatechin	LC-ESI-QTOF	positive	290.079	C15H14O6	2	2	8	16	17	5	1.17647	0	1	0.294118	0	1	0.0955882	13.313	0.0009936	successful ranked
686	Epicatechin	LC-ESI-QTOF	positive	290.079	C15H14O6	1	1	8	38	30	16	1.21429	0	1	0.551724	0	1	0.00492611	13.4603	0.0015286	successful ranked
687	Epicatechin	LC-ESI-QTOF	positive	290.079	C15H14O6	2	2	8	34	31	17	1.29064	0	1	0.586207	0	1	0.0270936	21.5685	0.001599	successful ranked
688	Epicatechin	LC-ESI-QTOF	positive	290.079	C15H14O6	6	6	8	59	26	2	1.07077	0	1	0.0769231	0	1	0.0215385	4.26039	0.0011701	successful ranked
689	Epicatechin	LC-ESI-QTOF	positive	290.079	C15H14O6	2	2	8	53	32	8	1.07258	0	1	0.25	0	0	0.0181452	4.34672	0.0014257	successful ranked
690	Epicatechin	LC-ESI-QTOF	positive	290.079	C15H14O6	1	1	8	68	32	11	1.09677	0	1	0.34375	0	1	0.0241935	3.57464	0.0013858	successful ranked
691	Epicatechin	LC-ESI-QTOF	positive	290.079	C15H14O6	1	1	8	5	5	4	1.9	0	1	0.8	1	1	0.6	56.18	0.0005536	successful ranked
692	3-Methylxanthine	LC-ESI-QTOF (UPLC Q-Tof Premier; Waters)	positive	166.049	C6H6N4O2	1	1	2	8	8	4	1.25	0	1	0.5	1	1	0.107143	10.3994	0.0002225	successful ranked
693	3-Methylxanthine	LC-ESI-QTOF (UPLC Q-Tof Premier; Waters)	negative	166.049	C6H6N4O2	2	2	2	8	7	4	1.53333	1	1	0.666667	1	0	0.133333	11.8119	0.0002031	successful ranked
694	3-Methylxanthine	LC-ESI-QTOF	negative	166.049	C6H6N4O2	2	2	2	8	7	4	1.53333	1	1	0.666667	1	0	0.133333	11.8119	0.0001917	successful ranked
695	3-Methylxanthine	LC-ESI-QTOF	positive	166.049	C6H6N4O2	1	1	2	8	8	4	1.25	0	1	0.5	1	1	0.107143	10.3994	0.0001999	successful ranked
696	N*N-Dimethylformamide	LC-ESI-QTOF (UPLC Q-Tof Premier; Waters)	positive	73.0528	C3H7NO	1	1	1	3	1	-1	1.43088	-1	-1	-1	-1	-1	-1	0	-1	Single candidate matches with the answer.
697	N*N-Dimethylformamide	LC-ESI-QTOF	positive	73.0528	C3H7NO	1	1	1	3	1	-1	1.43088	-1	-1	-1	-1	-1	-1	0	-1	Single candidate matches with the answer.
698	Theophylline	LC-ESI-qTof	positive	180.065	C7H8N4O2	1	1	2	113	35	3	1.03333	1	1	0.1875	1	1	0.0166667	2.77981	0.0004005	successful ranked
699	Theophylline	LC-ESI-qTof	positive	180.065	C7H8N4O2	1	1	2	23	15	3	1.13889	0	1	0.333333	1	1	0.138889	12.217	0.0003209	successful ranked
700	Theophylline	LC-ESI-QTOF	positive	180.065	C7H8N4O2	1	1	2	6	6	4	1.53333	0	1	0.666667	1	1	0.533333	23.494	0.0001748	successful ranked
701	Theophylline	LC-ESI-QTOF	positive	180.065	C7H8N4O2	1	1	2	3	2	0	0.999999	-1	0	-1	-1	-1	-1	40.3201	9.81e-05	No mother-daughter relation is found for all the precursor formula.
702	Theophylline	LC-ESI-QTOF	positive	180.065	C7H8N4O2	1	1	2	9	8	3	1.2381	1	1	0.428571	1	1	0.190476	15.0521	0.0001862	successful ranked
703	Theophylline	LC-ESI-QTOF	positive	180.065	C7H8N4O2	1	1	2	19	19	10	1.25735	1	1	0.588235	1	1	0.235294	9.56764	0.000311	successful ranked
704	Theophylline	LC-ESI-QTOF	positive	180.065	C7H8N4O2	1	1	2	21	22	12	1.20915	1	1	0.666667	1	1	0.189542	12.3989	0.0003212	successful ranked
705	Theophylline	LC-ESI-QTOF	positive	180.065	C7H8N4O2	1	1	2	28	29	12	1.18577	1	1	0.521739	1	1	0.185771	10.8666	0.0003695	successful ranked
706	Menadione	LC-ESI-qTof	positive	172.052	C11H8O2	2	2	5	76	31	4	1.05789	0	1	0.2	0	0	0.0157895	2.91547	0.0008312	successful ranked
707	Aspartame	LC-ESI-qTof	positive	294.122	C14H18N2O5	1	1	6	410	30	21	1.32874	0	1	0.7	1	1	0.245977	1.18883	0.0011139	successful ranked
708	Aspartame	LC-ESI-QTOF	positive	294.122	C14H18N2O5	1	1	6	23	24	14	1.22826	0	1	0.583333	1	0	0.0507246	10.3716	0.0010282	successful ranked
709	Aminocaproic acid	LC-ESI-QTOF (UPLC Q-Tof Premier; Waters)	positive	131.095	C6H13NO2	1	1	1	9	9	-1	0.999999	-1	-1	-1	-1	-1	-1	7.54121	-1	Single candidate matches with the answer.
710	Aminocaproic acid	LC-ESI-QTOF	positive	131.095	C6H13NO2	1	1	1	9	9	-1	0.999999	-1	-1	-1	-1	-1	-1	7.66882	-1	Single candidate matches with the answer.
711	Aminocaproic acid	LC-ESI-QTOF	positive	131.095	C6H13NO2	1	1	1	16	16	-1	0.999999	-1	-1	-1	-1	-1	-1	6.22313	-1	Single candidate matches with the answer.
712	Aminocaproic acid	LC-ESI-QTOF	positive	131.095	C6H13NO2	1	1	1	21	22	-1	0.999999	-1	-1	-1	-1	-1	-1	5.45647	-1	Single candidate matches with the answer.
713	Aminocaproic acid	LC-ESI-QTOF	positive	131.095	C6H13NO2	1	1	1	28	29	-1	0.999999	-1	-1	-1	-1	-1	-1	5.48117	-1	Single candidate matches with the answer.
714	Aminocaproic acid	LC-ESI-QTOF	positive	131.095	C6H13NO2	1	1	1	9	9	-1	0.999999	-1	-1	-1	-1	-1	-1	7.54121	-1	Single candidate matches with the answer.
715	2-Aminoisobutyric acid	LC-ESI-QTOF (UPLC Q-Tof Premier; Waters)	positive	103.063	C4H9NO2	1	1	1	5	5	-1	0.999999	-1	-1	-1	-1	-1	-1	11.9965	-1	Single candidate matches with the answer.
716	2-Aminoisobutyric acid	LC-ESI-QTOF	positive	103.063	C4H9NO2	1	1	1	5	5	-1	0.999999	-1	-1	-1	-1	-1	-1	11.9965	-1	Single candidate matches with the answer.
717	Omeprazole	LC-ESI-qTof	positive	345.115	C17H19N3O3S	2	2	5	98	31	7	1.09474	0	1	0.35	0	1	0.0526316	5.00354	0.0011951	successful ranked
718	Omeprazole	LC-ESI-QTOF	positive	345.115	C17H19N3O3S	1	1	5	12	11	7	1.2	0	1	0.636364	1	1	0.0545455	44.8503	0.0005621	successful ranked
719	Omeprazole	LC-ESI-QTOF	positive	345.115	C17H19N3O3S	1	1	5	12	13	7	1.12821	1	1	0.538462	1	1	0.025641	40.9871	0.0005842	successful ranked
720	Omeprazole	LC-ESI-QTOF	positive	345.115	C17H19N3O3S	1	1	5	17	18	17	1.33333	0	1	0.944444	1	1	0.0326797	34.6852	0.000744	successful ranked
721	Omeprazole	LC-ESI-QTOF	positive	345.115	C17H19N3O3S	1	1	5	20	21	19	1.35714	0	1	0.904762	1	1	0.00952381	32.6187	0.0007253	successful ranked
722	Omeprazole	LC-ESI-QTOF	positive	345.115	C17H19N3O3S	2	2	5	17	18	14	1.30719	0	1	0.777778	0	1	0.0196078	35.1774	0.0006863	successful ranked
723	Famotidine	LC-ESI-qTof	positive	337.045	C8H15N7O2S3	2	2	5	284	30	13	1.22906	1	1	0.448276	0	1	0.12069	6.41967	0.0011336	successful ranked
724	Famotidine	LC-ESI-qTof	positive	337.045	C8H15N7O2S3	2	2	5	75	30	12	1.11667	1	1	0.48	1	0	0.00666667	11.4571	0.0009857	successful ranked
725	1*1-Dimethylbiguanide	LC-ESI-QTOF	positive	129.101	C4H11N5	1	1	1	11	11	-1	0.999998	-1	-1	-1	-1	-1	-1	7.95551	-1	Single candidate matches with the answer.
726	1*1-Dimethylbiguanide	LC-ESI-QTOF	positive	129.101	C4H11N5	1	1	1	8	8	-1	0.999998	-1	-1	-1	-1	-1	-1	8.43301	-1	Single candidate matches with the answer.
727	1*1-Dimethylbiguanide	LC-ESI-QTOF	positive	129.101	C4H11N5	1	1	1	11	11	-1	0.999998	-1	-1	-1	-1	-1	-1	7.89722	-1	Single candidate matches with the answer.
728	1*1-Dimethylbiguanide	LC-ESI-QTOF	positive	129.101	C4H11N5	1	1	1	11	12	-1	0.999998	-1	-1	-1	-1	-1	-1	13.0038	-1	Single candidate matches with the answer.
729	Atenolol	LC-ESI-qTof	positive	266.163	C14H22N2O3	1	1	1	535	30	-1	0.999998	-1	-1	-1	-1	-1	-1	1.11193	-1	Single candidate matches with the answer.
730	Atenolol	LC-ESI-QTOF	positive	266.163	C14H22N2O3	1	1	1	54	30	-1	0.999998	-1	-1	-1	-1	-1	-1	5.18441	-1	Single candidate matches with the answer.
731	Atenolol	LC-ESI-QTOF	positive	266.163	C14H22N2O3	1	1	1	10	9	-1	0.999998	-1	-1	-1	-1	-1	-1	17.3219	-1	Single candidate matches with the answer.
732	Atenolol	LC-ESI-QTOF	positive	266.163	C14H22N2O3	1	1	1	35	30	-1	0.999998	-1	-1	-1	-1	-1	-1	7.50321	-1	Single candidate matches with the answer.
733	Atenolol	LC-ESI-QTOF	positive	266.163	C14H22N2O3	1	1	1	35	30	-1	0.999998	-1	-1	-1	-1	-1	-1	10.1506	-1	Single candidate matches with the answer.
734	Atenolol	LC-ESI-QTOF	positive	266.163	C14H22N2O3	1	1	1	39	30	-1	0.999998	-1	-1	-1	-1	-1	-1	14.1639	-1	Single candidate matches with the answer.
735	Atenolol	LC-ESI-QTOF	positive	266.163	C14H22N2O3	1	1	1	8	8	-1	0.999998	-1	-1	-1	-1	-1	-1	14.8881	-1	Single candidate matches with the answer.
736	Atenolol	LC-ESI-QTOF	positive	266.163	C14H22N2O3	1	1	1	34	30	-1	0.999998	-1	-1	-1	-1	-1	-1	6.15396	-1	Single candidate matches with the answer.
737	Atenolol	LC-ESI-QTOF	positive	266.163	C14H22N2O3	1	1	1	45	30	-1	0.999998	-1	-1	-1	-1	-1	-1	13.3456	-1	Single candidate matches with the answer.
738	Ibuprofen	LC-ESI-qTof	positive	206.131	C13H18O2	1	1	4	355	31	4	1.04286	0	1	0.190476	0	1	0.00952381	1.80555	0.0006924	successful ranked
739	Ibuprofen	LC-ESI-qTof	positive	206.131	C13H18O2	2	3	4	301	30	4	1.05291	0	0	0.142857	0	1	0.0291005	1.03459	0.0006646	successful ranked
740	Ranitidine	LC-ESI-qTof	positive	314.141	C13H22N4O3S	1	1	5	232	31	22	1.22581	1	1	0.709677	1	1	0.137634	1.97174	0.0009294	successful ranked
741	Ranitidine	LC-ESI-QTOF	positive	314.141	C13H22N4O3S	1	1	5	9	8	4	1.28571	1	1	0.5	1	0	0.0357143	21.2592	0.0004107	successful ranked
742	Ranitidine	LC-ESI-QTOF	positive	314.141	C13H22N4O3S	1	1	5	44	30	15	1.12069	1	1	0.517241	1	1	0.00985222	13.5024	0.000888	successful ranked
743	Ranitidine	LC-ESI-QTOF	positive	314.141	C13H22N4O3S	2	2	5	78	30	17	1.14778	1	1	0.586207	1	1	0.0172414	10.421	0.0008948	successful ranked
744	Ranitidine	LC-ESI-QTOF	positive	314.141	C13H22N4O3S	2	2	5	108	30	20	1.26897	1	1	0.666667	1	1	0.0344828	9.01279	0.0009698	successful ranked
745	Ranitidine	LC-ESI-QTOF	positive	314.141	C13H22N4O3S	1	4	5	3	3	1	1.33333	1	0	0.333333	1	0	0	34.6377	0.0002691	successful ranked
746	Metoprolol	LC-ESI-QTOF	positive	267.183	C15H25NO3	1	1	1	51	30	-1	0.999998	-1	-1	-1	-1	-1	-1	5.50192	-1	Single candidate matches with the answer.
747	Metoprolol	LC-ESI-QTOF	positive	267.183	C15H25NO3	1	1	1	7	7	-1	0.999998	-1	-1	-1	-1	-1	-1	24.9667	-1	Single candidate matches with the answer.
748	Metoprolol	LC-ESI-QTOF	positive	267.183	C15H25NO3	1	1	1	42	30	-1	0.999998	-1	-1	-1	-1	-1	-1	5.94615	-1	Single candidate matches with the answer.
749	Metoprolol	LC-ESI-QTOF	positive	267.183	C15H25NO3	1	1	1	40	30	-1	0.999998	-1	-1	-1	-1	-1	-1	17.0104	-1	Single candidate matches with the answer.
750	Nicotine	LC-ESI-QTOF (UPLC Q-Tof Premier; Waters)	positive	162.116	C10H14N2	1	1	1	8	8	-1	0.999999	-1	-1	-1	-1	-1	-1	10.8851	-1	Single candidate matches with the answer.
751	Nicotine	LC-ESI-QTOF	positive	162.116	C10H14N2	1	1	1	8	8	-1	0.999999	-1	-1	-1	-1	-1	-1	10.8851	-1	Single candidate matches with the answer.
752	Doxylamine	LC-ESI-qTof	positive	270.173	C17H22N2O	1	1	3	530	30	11	1.19	0	1	0.44	1	1	0.12	0.882694	0.0005733	successful ranked
753	Salbutamol	LC-ESI-qTof	positive	239.152	C13H21NO3	2	2	2	75	30	2	1.01	0	1	0.08	0	1	0.00333333	3.91759	0.0003783	successful ranked
754	Salbutamol	LC-ESI-QTOF	positive	239.152	C13H21NO3	1	1	2	8	6	3	1.4	0	1	0.5	1	1	0.2	21.1376	0.0001777	successful ranked
755	Salbutamol	LC-ESI-QTOF	positive	239.152	C13H21NO3	1	1	2	18	19	12	1.2924	0	1	0.631579	1	1	0.222222	14.0421	0.000336	successful ranked
756	Salbutamol	LC-ESI-QTOF	positive	239.152	C13H21NO3	1	1	2	5	5	3	1.6	0	1	0.6	1	1	0.5	22.0268	0.000175	successful ranked
757	Salbutamol	LC-ESI-QTOF	positive	239.152	C13H21NO3	1	1	2	8	9	8	1.77778	0	1	0.888889	1	1	0.694444	23.5688	0.0002077	successful ranked
758	Salbutamol	LC-ESI-QTOF	positive	239.152	C13H21NO3	1	1	2	26	27	23	1.53846	0	1	0.851852	1	1	0.504274	17.9547	0.0004342	successful ranked
759	Salbutamol	LC-ESI-QTOF	positive	239.152	C13H21NO3	1	1	2	39	30	26	1.49655	0	1	0.866667	1	1	0.452874	14.6316	0.0004502	successful ranked
760	Salbutamol	LC-ESI-QTOF	positive	239.152	C13H21NO3	1	1	2	35	30	21	1.43077	0	1	0.807692	1	1	0.369231	15.7724	0.0004421	successful ranked
761	Lisinopril	LC-ESI-qTof	positive	405.226	C21H31N3O5	1	1	6	284	30	25	1.2931	1	1	0.862069	1	1	0.140394	8.52947	0.0011179	successful ranked
762	Lisinopril	LC-ESI-qTof	positive	405.226	C21H31N3O5	1	1	6	284	30	25	1.2931	1	1	0.862069	1	1	0.140394	8.52947	0.0010757	successful ranked
763	Medroxyprogesterone	LC-ESI-qTof	positive	344.235	C22H32O3	1	1	3	308	30	19	1.4245	0	1	0.703704	1	1	0.327635	1.33102	0.000745	successful ranked
764	Triamterene	LC-ESI-QTOF	positive	253.108	C12H11N7	1	1	5	7	6	4	1.53333	0	1	0.666667	1	1	0.2	21.9702	0.0004451	successful ranked
765	Triamterene	LC-ESI-QTOF	positive	253.108	C12H11N7	1	1	5	23	22	13	1.29004	0	1	0.590909	1	1	0.12987	7.00427	0.000788	successful ranked
766	Triamterene	LC-ESI-QTOF	positive	253.108	C12H11N7	1	1	5	40	30	20	1.37471	0	1	0.666667	1	1	0.218391	4.36055	0.0009133	successful ranked
767	Phenylpropanolamine	LC-ESI-QTOF	positive	151.1	C9H13NO	1	1	2	12	13	7	1.27273	0	1	0.636364	1	1	0.0363636	10.7385	0.000257	successful ranked
768	Caffeic acid	LC-ESI-QTOF (UPLC Q-Tof Premier; Waters)	negative	180.042	C9H8O4	1	1	3	12	12	5	1.86667	0	1	0.833333	1	1	0.266667	13.2171	0.0003207	successful ranked
769	Caffeic acid	LC-ESI-QTOF (UPLC Q-Tof Premier; Waters)	negative	180.042	C9H8O4	1	2	3	10	11	5	1.86667	0	0	0.833333	1	0	0	14.1333	0.0002845	successful ranked
770	Caffeic acid	LC-ESI-QTOF (UPLC Q-Tof Premier; Waters)	negative	180.042	C9H8O4	2	3	3	13	14	0	1.03571	0	0	0	0	1	0.0357143	11.8487	0.0003706	successful ranked
771	Caffeic acid	LC-ESI-QTOF (UPLC Q-Tof Premier; Waters)	positive	180.042	C9H8O4	1	1	3	14	14	8	1.38462	0	1	0.615385	1	1	0.0897436	7.9519	0.0004008	successful ranked
772	Caffeic acid	LC-ESI-QTOF (UPLC Q-Tof Premier; Waters)	positive	180.042	C9H8O4	3	3	3	10	11	0	1.1	0	1	0	0	0	0	14.0156	0.0003328	successful ranked
773	Caffeic acid	LC-ESI-QTOF (UPLC Q-Tof Premier; Waters)	positive	180.042	C9H8O4	1	1	3	14	14	8	1.45455	0	1	0.727273	1	1	0.145455	6.39526	0.0003989	successful ranked
774	Caffeic acid	LC-ESI-QTOF (UPLC Q-Tof Premier; Waters)	negative	180.042	C9H8O4	1	2	3	3	3	2	2	0	0	0.666667	1	0	0	25.1115	0.0002021	successful ranked
775	Caffeic acid	LC-ESI-QTOF	negative	180.042	C9H8O4	1	1	3	12	12	5	1.86667	0	1	0.833333	1	1	0.266667	13.2171	0.0003059	successful ranked
776	Caffeic acid	LC-ESI-QTOF	negative	180.042	C9H8O4	1	2	3	10	11	5	1.86667	0	0	0.833333	1	0	0	14.1333	0.0002859	successful ranked
777	Caffeic acid	LC-ESI-QTOF	negative	180.042	C9H8O4	2	3	3	13	14	0	1.03571	0	0	0	0	1	0.0357143	11.8487	0.000359	successful ranked
778	Caffeic acid	LC-ESI-QTOF	negative	180.042	C9H8O4	1	2	3	3	3	2	2	0	0	0.666667	1	0	0	25.1115	0.0001978	successful ranked
779	Caffeic acid	LC-ESI-QTOF	positive	180.042	C9H8O4	1	1	3	14	14	8	1.38462	0	1	0.615385	1	1	0.0897436	7.9519	0.0004564	successful ranked
780	Caffeic acid	LC-ESI-QTOF	positive	180.042	C9H8O4	3	3	3	10	11	0	1.1	0	1	0	0	0	0	14.0156	0.0003144	successful ranked
781	Caffeic acid	LC-ESI-QTOF	positive	180.042	C9H8O4	1	1	3	14	14	8	1.45455	0	1	0.727273	1	1	0.145455	6.39526	0.0004036	successful ranked
782	Finasteride	LC-ESI-qTof	positive	372.278	C23H36N2O2	1	1	2	172	31	7	1.11765	0	1	0.411765	1	1	0.0661765	6.67371	0.0004345	successful ranked
783	Tetracosanoic acid	LC-ESI-QTOF (UPLC Q-Tof Premier; Waters)	positive	368.365	C24H48O2	1	1	1	4	4	-1	0.999996	-1	-1	-1	-1	-1	-1	104.791	-1	Single candidate matches with the answer.
784	Tetracosanoic acid	LC-ESI-QTOF	positive	368.365	C24H48O2	1	1	1	4	4	-1	0.999996	-1	-1	-1	-1	-1	-1	104.791	-1	Single candidate matches with the answer.
785	5-Methoxydimethyltryptamine	LC-ESI-qTof	positive	218.142	C13H18N2O	1	1	2	452	30	12	1.2332	0	1	0.521739	1	1	0.193676	1.11936	0.0004441	successful ranked
786	Phytol	LC-ESI-QTOF	positive	296.308	C20H40O	1	1	1	13	12	-1	1	-1	-1	-1	-1	-1	-1	29.7825	-1	Single candidate matches with the answer.
787	1*9-Dimethyluric acid	LC-ESI-QTOF	negative	196.06	C7H8N4O3	2	2	3	9	9	1	1.06667	1	0	0.166667	1	0	0	13.1355	0.0003832	successful ranked
788	1*9-Dimethyluric acid	LC-ESI-QTOF	negative	196.06	C7H8N4O3	1	1	3	12	12	2	1.04444	1	1	0.2	1	1	0.0222222	9.62363	0.0004408	successful ranked
789	1*9-Dimethyluric acid	LC-ESI-QTOF	positive	196.06	C7H8N4O3	2	2	3	3	3	1	1.33333	0	0	0.333333	1	0	0	16.4674	0.0001782	successful ranked
790	1*9-Dimethyluric acid	LC-ESI-QTOF	positive	196.06	C7H8N4O3	1	2	3	6	6	1	1.1	1	0	0.2	1	0	0	14.0013	0.0002179	successful ranked
791	4-Hydroxycinnamic acid	LC-ESI-QTOF (UPLC Q-Tof Premier; Waters)	positive	164.047	C9H8O3	1	1	4	6	6	5	2	0	1	0.833333	1	0	0.2	7.6094	0.0003511	successful ranked
792	4-Hydroxycinnamic acid	LC-ESI-QTOF (UPLC Q-Tof Premier; Waters)	negative	164.047	C9H8O3	1	1	4	4	4	2	2	0	1	0.666667	1	1	0.666667	21.3126	0.0002628	successful ranked
793	4-Hydroxycinnamic acid	LC-ESI-QTOF (UPLC Q-Tof Premier; Waters)	negative	164.047	C9H8O3	2	4	4	5	4	0	1.33333	0	0	0	0	1	0.333333	11.8907	0.0004149	successful ranked
794	4-Hydroxycinnamic acid	LC-ESI-QTOF	negative	164.047	C9H8O3	1	1	4	4	4	2	2	0	1	0.666667	1	1	0.666667	21.3126	0.0004079	successful ranked
795	4-Hydroxycinnamic acid	LC-ESI-QTOF	negative	164.047	C9H8O3	2	4	4	5	4	0	1.33333	0	0	0	0	1	0.333333	11.8907	0.0003271	successful ranked
796	4-Hydroxycinnamic acid	LC-ESI-QTOF	positive	164.047	C9H8O3	1	1	4	6	6	5	2	0	1	0.833333	1	0	0.2	7.6094	0.0005521	successful ranked
797	4-Methoxycinnamic acid	LC-ESI-QTOF (UPLC Q-Tof Premier; Waters)	negative	178.063	C10H10O3	1	2	4	7	6	4	1.6	0	0	0.666667	1	0	0	16.8388	0.0005909	successful ranked
798	4-Methoxycinnamic acid	LC-ESI-QTOF (UPLC Q-Tof Premier; Waters)	negative	178.063	C10H10O3	2	2	4	16	15	2	1.5	0	0	0.5	1	0	0	13.7584	0.000672	successful ranked
799	4-Methoxycinnamic acid	LC-ESI-QTOF (UPLC Q-Tof Premier; Waters)	positive	178.063	C10H10O3	1	1	4	16	16	9	1.51282	0	1	0.692308	1	1	0.25641	8.75218	0.0005484	successful ranked
800	4-Methoxycinnamic acid	LC-ESI-QTOF (UPLC Q-Tof Premier; Waters)	positive	178.063	C10H10O3	1	1	4	15	16	8	1.41026	0	1	0.615385	1	0	0.115385	8.84804	0.0005615	successful ranked
801	4-Methoxycinnamic acid	LC-ESI-QTOF (UPLC Q-Tof Premier; Waters)	positive	178.063	C10H10O3	2	2	4	23	24	9	1.29412	0	1	0.5	0	1	0.0980392	7.28652	0.0006968	successful ranked
802	4-Methoxycinnamic acid	LC-ESI-qTof	positive	178.063	C10H10O3	2	3	4	74	33	4	1.16842	0	0	0.2	0	1	0.115789	3.46173	0.0007827	successful ranked
803	4-Methoxycinnamic acid	LC-ESI-QTOF	negative	178.063	C10H10O3	1	2	4	7	6	4	1.6	0	0	0.666667	1	0	0	16.8388	0.0003639	successful ranked
804	4-Methoxycinnamic acid	LC-ESI-QTOF	negative	178.063	C10H10O3	2	2	4	16	15	2	1.5	0	0	0.5	1	0	0	13.7584	0.0004913	successful ranked
805	4-Methoxycinnamic acid	LC-ESI-QTOF	positive	178.063	C10H10O3	1	1	4	16	16	9	1.51282	0	1	0.692308	1	1	0.25641	8.75218	0.0005657	successful ranked
806	4-Methoxycinnamic acid	LC-ESI-QTOF	positive	178.063	C10H10O3	1	1	4	15	16	8	1.41026	0	1	0.615385	1	0	0.115385	8.84804	0.0005533	successful ranked
807	4-Methoxycinnamic acid	LC-ESI-QTOF	positive	178.063	C10H10O3	2	2	4	23	24	9	1.29412	0	1	0.5	0	1	0.0980392	7.28652	0.0006171	successful ranked
808	N-Acetylputrescine	LC-ESI-QTOF (UPLC Q-Tof Premier; Waters)	positive	130.111	C6H14N2O	1	1	1	3	3	-1	0.999999	-1	-1	-1	-1	-1	-1	17.666	-1	Single candidate matches with the answer.
809	N-Acetylputrescine	LC-ESI-QTOF	positive	130.111	C6H14N2O	1	1	1	3	3	-1	0.999999	-1	-1	-1	-1	-1	-1	17.666	-1	Single candidate matches with the answer.
810	N-Oleoylethanolamine	LC-ESI-qTof	positive	325.298	C20H39NO2	1	1	1	1227	30	-1	0.999997	-1	-1	-1	-1	-1	-1	0.38218	-1	Single candidate matches with the answer.
811	Apigenin	LC-ESI-qTof	positive	270.053	C15H10O5	4	5	8	486	30	2	1.02597	0	0	0.0909091	0	1	0.004329	1.49639	0.0012137	successful ranked
812	Apigenin	LC-ESI-qTof	positive	270.053	C15H10O5	1	1	8	674	30	12	1.133	0	1	0.413793	0	1	0.00246305	0.493861	0.001397	successful ranked
813	Apigenin	LC-ESI-QTOF	negative	270.053	C15H10O5	3	3	10	3	1	0	0.972233	-1	0	-1	-1	-1	-1	0	0	No mother-daughter relation is found for all the precursor formula.
814	Apigenin	LC-ESI-QTOF	negative	270.053	C15H10O5	1	2	8	6	4	3	1.66667	0	0	0.75	1	0	0	35.6908	0.0004775	successful ranked
815	Apigenin	LC-ESI-QTOF	negative	270.053	C15H10O5	1	1	8	22	20	15	1.41579	0	1	0.75	1	0	0.152632	9.19543	0.0011052	successful ranked
816	Apigenin	LC-ESI-QTOF	negative	270.053	C15H10O5	1	1	8	23	22	18	1.43723	0	1	0.818182	1	1	0.186147	10.666	0.0010874	successful ranked
817	Apigenin	LC-ESI-QTOF	negative	270.053	C15H10O5	1	1	8	9	10	8	1.6	0	1	0.8	1	0	0.288889	23.3593	0.0006558	successful ranked
818	Apigenin	LC-ESI-QTOF	negative	270.053	C15H10O5	1	1	8	11	9	8	1.75	0	1	0.888889	1	1	0.305556	17.2659	0.0006783	successful ranked
819	Apigenin	LC-ESI-QTOF	negative	270.053	C15H10O5	6	7	8	17	17	1	1.18182	0	0	0.0909091	0	0	0.0363636	14.9721	0.0012058	successful ranked
820	Apigenin	LC-ESI-QTOF	negative	270.053	C15H10O5	1	1	8	3	3	2	1.66667	0	1	0.666667	1	1	0.333333	60.7671	0.0004253	successful ranked
821	Apigenin	LC-ESI-QTOF	negative	270.053	C15H10O5	1	1	8	5	5	4	1.7	0	1	0.8	1	1	0.3	30.9209	0.0004744	successful ranked
822	Apigenin	LC-ESI-QTOF	negative	270.053	C15H10O5	1	1	8	13	13	5	1.11538	0	1	0.384615	1	0	0.0128205	13.455	0.0013532	successful ranked
823	Apigenin	LC-ESI-QTOF	negative	270.053	C15H10O5	1	1	8	15	15	6	1.14286	0	1	0.428571	1	0	0.043956	11.9687	0.0016861	successful ranked
824	Apigenin	LC-ESI-QTOF	positive	270.053	C15H10O5	3	3	10	3	1	0	0.987767	-1	0	-1	-1	-1	-1	0	0	No mother-daughter relation is found for all the precursor formula.
825	Apigenin	LC-ESI-QTOF	positive	270.053	C15H10O5	4	4	9	3	1	0	0.930802	-1	0	-1	-1	-1	-1	0	0	No mother-daughter relation is found for all the precursor formula.
826	Apigenin	LC-ESI-QTOF	positive	270.053	C15H10O5	1	2	8	5	3	2	1.66667	0	0	0.666667	1	0	0	59.4483	0.0004365	successful ranked
827	Apigenin	LC-ESI-QTOF	positive	270.053	C15H10O5	1	1	8	23	21	18	1.53333	0	1	0.857143	1	0	0.133333	7.47154	0.0019576	successful ranked
828	Apigenin	LC-ESI-QTOF	positive	270.053	C15H10O5	1	1	8	33	30	26	1.50575	0	1	0.866667	1	1	0.190805	5.96433	0.0024414	successful ranked
829	Apigenin	LC-ESI-QTOF	positive	270.053	C15H10O5	1	1	8	19	18	8	1.26374	0	1	0.571429	1	1	0.10989	10.2721	0.0011518	successful ranked
830	Apigenin	LC-ESI-QTOF	positive	270.053	C15H10O5	1	1	8	13	11	3	1.19048	0	1	0.428571	1	0	0.047619	32.198	0.0008836	successful ranked
831	Apigenin	LC-ESI-QTOF	positive	270.053	C15H10O5	1	1	8	4	4	3	1.66667	0	1	0.75	1	1	0.166667	50.352	0.0005786	successful ranked
832	Apigenin	LC-ESI-QTOF	positive	270.053	C15H10O5	1	1	8	11	11	5	1.26667	0	1	0.5	1	0	0.0666667	23.295	0.0008624	successful ranked
833	Apigenin	LC-ESI-QTOF	positive	270.053	C15H10O5	1	2	8	6	6	2	1.13333	0	0	0.333333	1	0	0	25.9409	0.0005294	successful ranked
834	2-Phenylglycine	LC-ESI-QTOF	positive	151.063	C8H9NO2	1	1	2	6	3	0	0.999999	-1	0	-1	-1	-1	-1	12.3079	9.8e-05	No mother-daughter relation is found for all the precursor formula.
835	2-Phenylglycine	LC-ESI-QTOF	positive	151.063	C8H9NO2	1	1	2	5	4	1	1.16667	0	1	0.25	1	1	0.166667	12.0563	0.0001397	successful ranked
836	2-Phenylglycine	LC-ESI-QTOF	positive	151.063	C8H9NO2	1	1	2	10	6	0	0.999999	-1	0	-1	-1	-1	-1	8.09516	0.0001845	No mother-daughter relation is found for all the precursor formula.
837	Capsaicin	LC-ESI-QTOF	positive	305.199	C18H27NO3	1	1	2	6	6	4	1.8	0	1	0.8	1	1	0.7	46.4615	0.0001985	successful ranked
838	Picolinic acid	LC-ESI-QTOF	positive	123.032	C6H5NO2	1	1	2	5	4	2	1.33333	0	1	0.5	1	1	0.166667	8.04185	0.0001606	successful ranked
839	Picolinic acid	LC-ESI-QTOF	positive	123.032	C6H5NO2	1	1	2	4	4	2	1.33333	0	1	0.5	1	1	0.166667	4.63436	0.0001994	successful ranked
840	Curcumin	LC-ESI-QTOF	negative	368.126	C21H20O6	4	4	9	30	30	6	1.11905	0	1	0.285714	0	1	0.0190476	13.1616	0.0015269	successful ranked
841	Curcumin	LC-ESI-QTOF	negative	368.126	C21H20O6	7	8	9	7	8	1	1.25	0	0	0.125	0	1	0.0357143	34.293	0.0007995	successful ranked
842	Curcumin	LC-ESI-QTOF	negative	368.126	C21H20O6	2	3	9	10	11	3	1.21429	0	0	0.375	0	1	0.0714286	18.9057	0.0008081	successful ranked
843	Cadaverine	LC-ESI-QTOF (UPLC Q-Tof Premier; Waters)	positive	102.116	C5H14N2	1	1	1	3	2	-1	0.999999	-1	-1	-1	-1	-1	-1	9.80322	-1	Single candidate matches with the answer.
844	Cadaverine	LC-ESI-QTOF	positive	102.116	C5H14N2	1	1	1	3	2	-1	0.999999	-1	-1	-1	-1	-1	-1	9.80322	-1	Single candidate matches with the answer.
845	Coumesterol	LC-ESI-qTof	positive	268.037	C15H8O5	1	1	8	1000	30	17	1.28276	0	1	0.566667	1	1	0.137931	0.447413	0.0013648	successful ranked
846	Biochanin A	LC-ESI-QTOF	negative	284.068	C16H12O5	1	5	9	3	3	1	1.33333	0	0	0.333333	1	0	0	8.39711	0.0004251	successful ranked
847	Biochanin A	LC-ESI-QTOF	negative	284.068	C16H12O5	1	1	9	14	14	7	1.25275	0	1	0.5	1	1	0.0769231	17.2	0.0009774	successful ranked
848	Biochanin A	LC-ESI-QTOF	negative	284.068	C16H12O5	1	1	9	95	30	17	1.27586	0	1	0.566667	0	1	0.0712644	3.32815	0.0016609	successful ranked
849	Biochanin A	LC-ESI-QTOF	positive	284.068	C16H12O5	2	2	9	11	10	5	1.44444	0	1	0.5	0	1	0.222222	22.6485	0.0008079	successful ranked
850	Biochanin A	LC-ESI-QTOF	positive	284.068	C16H12O5	5	5	9	80	30	5	1.08736	0	1	0.166667	0	0	0.0505747	3.24825	0.0013433	successful ranked
851	Biochanin A	LC-ESI-QTOF	positive	284.068	C16H12O5	2	2	9	89	30	11	1.16931	0	1	0.392857	0	0	0.021164	3.31033	0.0016315	successful ranked
852	Biochanin A	LC-ESI-QTOF	positive	284.068	C16H12O5	1	1	9	8	6	0	0.999993	-1	0	-1	-1	-1	-1	7.05807	0.0004103	No mother-daughter relation is found for all the precursor formula.
853	Biochanin A	LC-ESI-QTOF	positive	284.068	C16H12O5	5	7	9	22	18	2	1.03922	0	0	0.111111	0	1	0.00653595	11.3729	0.0010445	successful ranked
854	Biochanin A	LC-ESI-QTOF	positive	284.068	C16H12O5	8	8	9	47	29	1	1.04433	0	1	0.0344828	0	1	0.0123153	4.04959	0.0013832	successful ranked
855	Biochanin A	LC-ESI-QTOF	positive	284.068	C16H12O5	8	8	9	116	31	1	1.05806	0	0	0.0322581	0	1	0.0344086	1.64857	0.0014201	successful ranked
856	Biochanin A	LC-ESI-QTOF	positive	284.068	C16H12O5	8	8	9	125	30	1	1.05977	0	1	0.0333333	0	1	0.0114943	1.50836	0.0014333	successful ranked
857	Biochanin A	LC-ESI-QTOF	positive	284.068	C16H12O5	4	5	9	8	8	3	1.28571	0	0	0.375	0	0	0.0357143	24.6214	0.0007509	successful ranked
858	Biochanin A	LC-ESI-QTOF	positive	284.068	C16H12O5	6	7	9	23	23	4	1.11462	0	0	0.173913	0	1	0.0316206	7.91143	0.0012593	successful ranked
859	Biochanin A	LC-ESI-QTOF	positive	284.068	C16H12O5	3	3	9	36	31	9	1.06237	0	1	0.290323	0	1	0.00215054	5.00398	0.00156	successful ranked
860	3*4*5-Trimethoxycinnamic acid	LC-ESI-qTof	positive	238.084	C12H14O5	1	1	5	252	31	17	1.27312	0	1	0.548387	1	1	0.0430108	1.54064	0.000932	successful ranked
861	3*4*5-Trimethoxycinnamic acid	LC-ESI-QTOF	positive	238.084	C12H14O5	2	4	5	37	18	1	1.00654	0	0	0.0555556	1	0	0	3.68833	0.000493	successful ranked
862	3*4*5-Trimethoxycinnamic acid	LC-ESI-QTOF	positive	238.084	C12H14O5	3	4	5	75	33	2	1.07765	0	0	0.0606061	0	1	0.0265152	2.23096	0.0009544	successful ranked
863	3*4*5-Trimethoxycinnamic acid	LC-ESI-QTOF	positive	238.084	C12H14O5	4	4	5	106	31	2	1.09032	0	1	0.0645161	0	1	0.0193548	1.96828	0.0008629	successful ranked
864	Beta-Glycerophosphoric acid	LC-ESI-QTOF	negative	172.014	C3H9O6P	1	1	3	3	3	2	2	0	1	0.666667	1	1	1	38.61	0.0001713	successful ranked
865	2-Hydroxycinnamic acid	LC-ESI-QTOF (UPLC Q-Tof Premier; Waters)	positive	164.047	C9H8O3	1	1	4	10	10	6	1.33333	0	1	0.6	1	1	0.0888889	7.6953	0.0003991	successful ranked
866	2-Hydroxycinnamic acid	LC-ESI-QTOF	positive	164.047	C9H8O3	1	1	4	10	10	6	1.33333	0	1	0.6	1	1	0.0888889	7.6953	0.000435	successful ranked
867	Erythrose	LC-ESI-QTOF (UPLC Q-Tof Premier; Waters)	positive	120.042	C4H8O4	1	1	1	4	4	-1	0.999999	-1	-1	-1	-1	-1	-1	13.0008	-1	Single candidate matches with the answer.
868	Erythrose	LC-ESI-QTOF	positive	120.042	C4H8O4	1	1	1	4	4	-1	0.999999	-1	-1	-1	-1	-1	-1	13.0008	-1	Single candidate matches with the answer.
869	Isorhamnetin	LC-ESI-QTOF	negative	316.058	C16H12O7	1	1	13	21	19	15	1.73203	0	1	0.833333	1	1	0.254902	13.9808	0.001807	successful ranked
870	Isorhamnetin	LC-ESI-QTOF	negative	316.058	C16H12O7	10	10	13	93	30	4	1.11232	0	1	0.166667	0	1	0.0217391	3.5908	0.0020591	successful ranked
871	Isorhamnetin	LC-ESI-QTOF	negative	316.058	C16H12O7	2	4	13	4	4	2	2	0	0	0.5	0	1	0.5	67.2026	0.0006853	successful ranked
872	Isorhamnetin	LC-ESI-QTOF	positive	316.058	C16H12O7	1	1	13	34	30	17	1.31217	0	1	0.607143	0	1	0.00793651	6.83255	0.0022745	successful ranked
873	Isorhamnetin	LC-ESI-QTOF	positive	316.058	C16H12O7	1	1	13	19	17	11	1.49167	0	1	0.6875	0	1	0.0583333	13.0205	0.0015989	successful ranked
874	Isorhamnetin	LC-ESI-QTOF	positive	316.058	C16H12O7	4	7	13	7	7	2	1.47619	0	0	0.285714	0	0	0.238095	16.8712	0.0009736	successful ranked
875	6-Hydroxynicotinic acid	LC-ESI-QTOF (UPLC Q-Tof Premier; Waters)	positive	139.027	C6H5NO3	1	1	2	8	8	5	1.8	0	1	0.833333	1	1	0.266667	6.17975	0.0002585	successful ranked
876	6-Hydroxynicotinic acid	LC-ESI-QTOF (UPLC Q-Tof Premier; Waters)	positive	139.027	C6H5NO3	1	2	2	5	5	1	1.16667	0	0	0.25	1	0	0	6.80477	0.000153	successful ranked
877	6-Hydroxynicotinic acid	LC-ESI-QTOF	positive	139.027	C6H5NO3	1	1	2	8	8	5	1.8	0	1	0.833333	1	1	0.266667	6.17975	0.0002087	successful ranked
878	6-Hydroxynicotinic acid	LC-ESI-QTOF	positive	139.027	C6H5NO3	1	2	2	5	5	1	1.16667	0	0	0.25	1	0	0	6.80477	0.000139	successful ranked
879	Naringenin	LC-ESI-QTOF (UPLC Q-Tof Premier; Waters)	positive	272.068	C15H12O5	3	3	10	6	1	0	0.97382	-1	0	-1	-1	-1	-1	0	0	No mother-daughter relation is found for all the precursor formula.
880	Naringenin	LC-ESI-QTOF (UPLC Q-Tof Premier; Waters)	positive	272.068	C15H12O5	1	1	8	6	1	0	0.999999	-1	0	-1	-1	-1	-1	0	0	No mother-daughter relation is found for all the precursor formula.
881	Naringenin	LC-ESI-QTOF (UPLC Q-Tof Premier; Waters)	negative	272.068	C15H12O5	1	1	8	20	16	11	1.42857	0	1	0.733333	1	1	0.152381	20.1439	0.0010383	successful ranked
882	Naringenin	LC-ESI-QTOF (UPLC Q-Tof Premier; Waters)	negative	272.068	C15H12O5	7	7	8	18	19	1	1.24176	0	1	0.0714286	0	1	0.0769231	19.7617	0.0010293	successful ranked
883	Naringenin	LC-ESI-QTOF (UPLC Q-Tof Premier; Waters)	positive	272.068	C15H12O5	5	5	8	20	21	4	1.07619	0	0	0.266667	0	0	0.00952381	26.2039	0.0011128	successful ranked
884	Naringenin	LC-ESI-QTOF (UPLC Q-Tof Premier; Waters)	positive	272.068	C15H12O5	5	5	8	17	15	2	1.16667	0	1	0.166667	0	1	0.030303	31.0359	0.0010138	successful ranked
885	Naringenin	LC-ESI-QTOF	negative	272.068	C15H12O5	1	2	8	4	2	1	2	0	0	0.5	1	0	0	0	0.0003151	successful ranked
886	Naringenin	LC-ESI-QTOF	negative	272.068	C15H12O5	1	1	8	13	11	8	1.41818	0	1	0.727273	1	1	0.163636	17.703	0.0007796	successful ranked
887	Naringenin	LC-ESI-QTOF	negative	272.068	C15H12O5	1	1	8	28	27	20	1.38746	0	1	0.740741	0	1	0.0968661	8.77681	0.0014144	successful ranked
888	Naringenin	LC-ESI-QTOF	negative	272.068	C15H12O5	1	1	8	23	24	20	1.50725	0	1	0.833333	1	1	0.253623	9.80343	0.0012655	successful ranked
889	Naringenin	LC-ESI-QTOF	negative	272.068	C15H12O5	1	1	8	13	14	12	1.56044	0	1	0.857143	1	1	0.263736	21.8847	0.000884	successful ranked
890	Naringenin	LC-ESI-QTOF	negative	272.068	C15H12O5	1	1	8	20	16	11	1.42857	0	1	0.733333	1	1	0.152381	20.1439	0.0010277	successful ranked
891	Naringenin	LC-ESI-QTOF	negative	272.068	C15H12O5	7	7	8	18	19	1	1.24176	0	1	0.0714286	0	1	0.0769231	19.7617	0.0010371	successful ranked
892	Naringenin	LC-ESI-QTOF	positive	272.068	C15H12O5	1	2	8	4	2	1	2	0	0	0.5	1	0	0	84.8935	0.0003119	successful ranked
893	Naringenin	LC-ESI-QTOF	positive	272.068	C15H12O5	2	2	8	9	7	4	1.38095	0	1	0.571429	0	1	0.047619	36.7194	0.0006601	successful ranked
894	Naringenin	LC-ESI-QTOF	positive	272.068	C15H12O5	1	2	8	8	8	5	1.39286	0	0	0.625	0	0	0	35.9715	0.0007123	successful ranked
895	Naringenin	LC-ESI-QTOF	positive	272.068	C15H12O5	1	1	8	9	10	6	1.33333	0	1	0.6	0	1	0.0666667	37.9227	0.0006795	successful ranked
896	Naringenin	LC-ESI-QTOF	positive	272.068	C15H12O5	1	1	8	11	12	9	1.39394	0	1	0.75	0	1	0.121212	34.6195	0.0008244	successful ranked
897	Naringenin	LC-ESI-QTOF	positive	272.068	C15H12O5	5	5	8	20	21	4	1.07619	0	0	0.266667	0	0	0.00952381	26.2039	0.0011086	successful ranked
898	Naringenin	LC-ESI-QTOF	positive	272.068	C15H12O5	5	5	8	17	15	2	1.16667	0	1	0.166667	0	1	0.030303	31.0359	0.0009389	successful ranked
899	Nandrolone	LC-ESI-QTOF	positive	274.193	C18H26O2	1	1	3	50	30	26	1.67241	0	1	0.896552	1	1	0.53202	4.29044	0.0006425	successful ranked
900	Nandrolone	LC-ESI-QTOF	positive	274.193	C18H26O2	1	1	3	64	30	29	1.75172	0	1	0.966667	1	1	0.685057	4.18514	0.0007914	successful ranked
901	Nandrolone	LC-ESI-QTOF	positive	274.193	C18H26O2	1	1	3	61	30	27	1.62989	0	1	0.9	1	1	0.577011	9.94491	0.0007267	successful ranked
902	Nandrolone	LC-ESI-QTOF	positive	274.193	C18H26O2	1	1	3	63	30	27	1.65764	0	1	0.931034	1	1	0.6133	13.2784	0.0006611	successful ranked
903	Myricetin	LC-ESI-QTOF (UPLC Q-Tof Premier; Waters)	positive	318.038	C15H10O8	1	1	8	7	2	0	0.999999	-1	0	-1	-1	-1	-1	0.0128292	0.0002814	No mother-daughter relation is found for all the precursor formula.
904	Myricetin	LC-ESI-QTOF (UPLC Q-Tof Premier; Waters)	negative	318.038	C15H10O8	1	1	8	21	18	13	1.54412	0	1	0.764706	1	1	0.227941	14.4636	0.0011456	successful ranked
905	Myricetin	LC-ESI-QTOF (UPLC Q-Tof Premier; Waters)	negative	318.038	C15H10O8	6	8	8	37	30	2	1.08187	0	0	0.105263	0	1	0.0292398	9.7376	0.0013294	successful ranked
906	Myricetin	LC-ESI-QTOF (UPLC Q-Tof Premier; Waters)	positive	318.038	C15H10O8	1	1	8	34	31	19	1.31264	0	1	0.633333	1	0	0.121839	8.6181	0.0015123	successful ranked
907	Myricetin	LC-ESI-QTOF (UPLC Q-Tof Premier; Waters)	positive	318.038	C15H10O8	1	1	8	19	17	11	1.50833	0	1	0.6875	1	0	0.2	9.97331	0.0010811	successful ranked
908	Myricetin	LC-ESI-qTof	positive	318.038	C15H10O8	1	1	8	497	30	12	1.12874	0	1	0.4	0	1	0.0091954	0.771899	0.0013962	successful ranked
909	Myricetin	LC-ESI-QTOF	negative	318.038	C15H10O8	2	2	9	3	1	0	0.994024	-1	0	-1	-1	-1	-1	0	0	No mother-daughter relation is found for all the precursor formula.
910	Myricetin	LC-ESI-QTOF	negative	318.038	C15H10O8	1	1	8	9	7	5	1.57143	0	1	0.714286	1	1	0.238095	33.401	0.000622	successful ranked
911	Myricetin	LC-ESI-QTOF	negative	318.038	C15H10O8	1	1	8	18	17	12	1.47059	0	1	0.705882	1	1	0.191176	18.4084	0.0009844	successful ranked
912	Myricetin	LC-ESI-QTOF	negative	318.038	C15H10O8	1	1	8	14	15	12	1.52381	0	1	0.8	1	0	0.114286	25.1143	0.0008654	successful ranked
913	Myricetin	LC-ESI-QTOF	negative	318.038	C15H10O8	2	2	8	9	10	8	1.68889	0	1	0.8	0	1	0.0222222	47.0549	0.0007528	successful ranked
914	Myricetin	LC-ESI-QTOF	negative	318.038	C15H10O8	1	1	8	21	18	13	1.54412	0	1	0.764706	1	1	0.227941	14.4636	0.0010589	successful ranked
915	Myricetin	LC-ESI-QTOF	negative	318.038	C15H10O8	6	8	8	37	30	2	1.08187	0	0	0.105263	0	1	0.0292398	9.7376	0.0013402	successful ranked
916	Myricetin	LC-ESI-QTOF	positive	318.038	C15H10O8	2	2	9	3	1	0	0.954024	-1	0	-1	-1	-1	-1	0	0	No mother-daughter relation is found for all the precursor formula.
917	Myricetin	LC-ESI-QTOF	positive	318.038	C15H10O8	4	4	10	3	1	0	0.89925	-1	0	-1	-1	-1	-1	0	0	No mother-daughter relation is found for all the precursor formula.
918	Myricetin	LC-ESI-QTOF	positive	318.038	C15H10O8	1	1	8	23	21	15	1.49524	0	1	0.714286	1	1	0.285714	8.41458	0.0011486	successful ranked
919	Myricetin	LC-ESI-QTOF	positive	318.038	C15H10O8	1	1	8	56	30	25	1.5954	0	1	0.833333	1	1	0.409195	3.84952	0.001463	successful ranked
920	Myricetin	LC-ESI-QTOF	positive	318.038	C15H10O8	1	1	8	57	30	26	1.5954	0	1	0.866667	1	1	0.381609	4.82908	0.0014124	successful ranked
921	Myricetin	LC-ESI-QTOF	positive	318.038	C15H10O8	1	1	8	34	30	19	1.33498	0	1	0.655172	1	1	0.150246	8.6181	0.0014886	successful ranked
922	Myricetin	LC-ESI-QTOF	positive	318.038	C15H10O8	1	1	8	19	17	11	1.50833	0	1	0.6875	1	0	0.2	9.97331	0.0010305	successful ranked
923	Cysteic acid	LC-ESI-QTOF	negative	169.004	C3H7NO5S	1	2	5	36	10	2	1.07143	0	0	0.25	1	0	0	4.22604	0.0004516	successful ranked
924	Cysteic acid	LC-ESI-QTOF	negative	169.004	C3H7NO5S	2	2	5	19	19	2	1.03846	0	0	0.153846	1	0	0	4.15729	0.0005347	successful ranked
925	Cysteic acid	LC-ESI-QTOF	positive	169.004	C3H7NO5S	2	3	5	4	4	1	1.33333	0	0	0.333333	1	0	0	13.1968	0.0002845	successful ranked
926	Catechin	LC-ESI-QTOF (UPLC Q-Tof Premier; Waters)	positive	290.079	C15H14O6	1	1	8	6	6	5	1.8	0	1	0.833333	1	1	0.466667	51.8854	0.000572	successful ranked
927	Catechin	LC-ESI-QTOF (UPLC Q-Tof Premier; Waters)	negative	290.079	C15H14O6	1	1	8	14	14	13	1.87912	0	1	0.928571	1	1	0.56044	13.2668	0.0008527	successful ranked
928	Catechin	LC-ESI-QTOF	negative	290.079	C15H14O6	4	6	8	8	8	2	1.21429	0	0	0.25	0	0	0	17.8549	0.000654	successful ranked
929	Catechin	LC-ESI-QTOF	negative	290.079	C15H14O6	1	1	8	55	30	15	1.1977	0	1	0.5	1	1	0.0942529	4.90775	0.0013112	successful ranked
930	Catechin	LC-ESI-QTOF	negative	290.079	C15H14O6	1	1	8	65	30	15	1.16782	0	1	0.5	1	1	0.0551724	7.86327	0.0013645	successful ranked
931	Catechin	LC-ESI-QTOF	negative	290.079	C15H14O6	3	4	8	61	30	11	1.12644	0	0	0.366667	0	1	0.0091954	11.2602	0.0013501	successful ranked
932	Catechin	LC-ESI-QTOF	negative	290.079	C15H14O6	1	1	8	14	14	13	1.87912	0	1	0.928571	1	1	0.56044	13.2668	0.00087	successful ranked
933	Catechin	LC-ESI-QTOF	positive	290.079	C15H14O6	3	3	8	15	14	4	1.15385	0	1	0.285714	0	1	0.043956	12.1354	0.0008772	successful ranked
934	Catechin	LC-ESI-QTOF	positive	290.079	C15H14O6	1	1	8	18	19	8	1.16374	0	1	0.421053	0	0	0.0175439	12.8272	0.0009981	successful ranked
935	Catechin	LC-ESI-QTOF	positive	290.079	C15H14O6	4	4	8	39	30	12	1.18719	0	1	0.413793	0	1	0.0517241	13.3149	0.0015418	successful ranked
936	Catechin	LC-ESI-QTOF	positive	290.079	C15H14O6	1	1	8	32	30	17	1.25369	0	1	0.586207	0	1	0.0172414	22.1779	0.0014479	successful ranked
937	Catechin	LC-ESI-QTOF	positive	290.079	C15H14O6	1	1	8	6	6	5	1.8	0	1	0.833333	1	1	0.466667	51.8854	0.000599	successful ranked
938	Cortisone	LC-ESI-qTof	positive	360.194	C21H28O5	1	1	7	1000	30	23	1.57143	0	1	0.821429	1	1	0.142857	0.79998	0.001396	successful ranked
939	Theobromine	LC-ESI-QTOF	positive	180.065	C7H8N4O2	1	1	2	16	15	6	1.17582	1	1	0.428571	1	1	0.153846	7.51038	0.0002731	successful ranked
940	Theobromine	LC-ESI-QTOF	positive	180.065	C7H8N4O2	1	1	2	35	30	21	1.35714	1	1	0.724138	1	1	0.347291	4.61126	0.0004741	successful ranked
941	Theobromine	LC-ESI-QTOF	positive	180.065	C7H8N4O2	1	1	2	27	28	15	1.21538	1	1	0.576923	1	1	0.181538	7.0597	0.0004026	successful ranked
942	Theobromine	LC-ESI-QTOF	positive	180.065	C7H8N4O2	1	1	2	30	30	10	1.10667	1	1	0.4	1	1	0.0966667	7.69561	0.0003564	successful ranked
943	Theobromine	LC-ESI-QTOF	positive	180.065	C7H8N4O2	1	1	2	5	4	1	1.16667	0	1	0.25	1	1	0.166667	12.4653	0.0001593	successful ranked
944	Theobromine	LC-ESI-QTOF	positive	180.065	C7H8N4O2	1	1	2	8	8	3	1.2381	0	1	0.428571	1	1	0.238095	11.4411	0.0002133	successful ranked
945	5-Methylcytosine	LC-ESI-QTOF	positive	125.059	C5H7N3O	1	1	1	3	3	-1	0.999999	-1	-1	-1	-1	-1	-1	13.1957	-1	Single candidate matches with the answer.
946	Ellagic acid	LC-ESI-qTof	positive	302.006	C14H6O8	5	5	6	86	31	4	1.06553	0	1	0.148148	0	0	0.00854701	4.56141	0.0010226	successful ranked
947	Naringin	LC-ESI-qTof	positive	580.179	C27H32O14	3	3	10	629	30	11	1.15608	0	1	0.392857	0	1	0.00793651	3.42616	0.0016785	successful ranked
948	Maltitol	LC-ESI-QTOF (UPLC Q-Tof Premier; Waters)	negative	344.132	C12H24O11	1	1	10	11	11	9	1.95556	0	1	0.9	1	1	0.377778	46.3524	0.0010172	successful ranked
949	O-Acetylserine	LC-ESI-QTOF (UPLC Q-Tof Premier; Waters)	positive	147.053	C5H9NO4	1	1	1	8	8	-1	0.999999	-1	-1	-1	-1	-1	-1	8.13053	-1	Single candidate matches with the answer.
950	O-Acetylserine	LC-ESI-QTOF	positive	147.053	C5H9NO4	1	1	1	8	8	-1	0.999999	-1	-1	-1	-1	-1	-1	8.13053	-1	Single candidate matches with the answer.
951	Aniline	LC-ESI-QTOF (UPLC Q-Tof Premier; Waters)	positive	93.0578	C6H7N	1	1	2	3	3	0	0.999999	-1	0	-1	-1	-1	-1	9.99992	0.0001284	No mother-daughter relation is found for all the precursor formula.
952	Aniline	LC-ESI-QTOF	positive	93.0578	C6H7N	1	1	2	3	3	0	0.999999	-1	0	-1	-1	-1	-1	9.99992	0.0001058	No mother-daughter relation is found for all the precursor formula.
953	Isoacitretin	LC-ESI-qTof	positive	326.188	C21H26O3	3	3	7	55	30	3	1.03667	0	1	0.12	0	1	0.01	7.76808	0.0011433	successful ranked
954	Chalcone	LC-ESI-QTOF (UPLC Q-Tof Premier; Waters)	positive	208.089	C15H12O	2	5	5	5	5	0	1.5	0	0	0	0	1	0.5	32.0879	0.0003091	successful ranked
955	Chalcone	LC-ESI-qTof	positive	208.089	C15H12O	2	2	5	1000	30	6	1.10541	0	1	0.222222	0	1	0.0569801	0.211996	0.0008125	successful ranked
956	Chalcone	LC-ESI-QTOF	positive	208.089	C15H12O	2	5	5	5	5	0	1.5	0	0	0	0	1	0.5	32.0879	0.0003321	successful ranked
957	Shikimic acid	LC-ESI-QTOF (UPLC Q-Tof Premier; Waters)	negative	174.053	C7H10O5	1	1	2	8	8	7	1.75	0	1	0.875	1	1	0.75	8.04913	0.0001747	successful ranked
958	Shikimic acid	LC-ESI-QTOF	negative	174.053	C7H10O5	1	1	2	8	8	7	1.75	0	1	0.875	1	1	0.75	8.04913	0.0001706	successful ranked
959	Gamma-Linolenic acid	LC-ESI-QTOF	negative	278.225	C18H30O2	1	1	2	3	3	0	0.999998	-1	0	-1	-1	-1	-1	34.6274	0.0001404	No mother-daughter relation is found for all the precursor formula.
960	Epigallocatechin gallate	LC-ESI-qTof	positive	458.085	C22H18O11	2	2	11	130	31	9	1.18182	0	1	0.391304	0	1	0.0513834	11.0809	0.0019063	successful ranked
961	Chlorogenic acid	LC-ESI-qTof	positive	354.095	C16H18O9	3	4	12	191	34	4	1.13187	0	0	0.285714	0	1	0	5.45103	0.0019308	successful ranked
962	Chlorogenic acid	LC-ESI-QTOF	negative	354.095	C16H18O9	1	1	12	7	4	3	1.83333	0	1	0.75	1	1	0.333333	70.776	0.0007235	successful ranked
963	Chlorogenic acid	LC-ESI-QTOF	negative	354.095	C16H18O9	1	3	12	5	5	3	1.3	0	0	0.6	1	0	0	69.164	0.0007184	successful ranked
964	Chlorogenic acid	LC-ESI-QTOF	negative	354.095	C16H18O9	1	2	12	4	5	4	1.5	0	0	0.8	1	0	0	75.6704	0.0007556	successful ranked
965	Chlorogenic acid	LC-ESI-QTOF	negative	354.095	C16H18O9	1	1	12	8	9	6	1.30556	0	1	0.666667	1	1	0.111111	53.9937	0.0009089	successful ranked
966	Chlorogenic acid	LC-ESI-QTOF	negative	354.095	C16H18O9	1	1	12	14	15	12	1.53333	0	1	0.8	1	0	0.133333	41.3233	0.0013161	successful ranked
967	Chlorogenic acid	LC-ESI-QTOF	positive	354.095	C16H18O9	3	7	12	3	3	1	1.66667	0	0	0.333333	0	0	0	134.39	0.0005562	successful ranked
968	Chlorogenic acid	LC-ESI-QTOF	positive	354.095	C16H18O9	4	5	12	3	4	2	1.66667	0	0	0.5	0	0	0	105.164	0.0006487	successful ranked
969	Chlorogenic acid	LC-ESI-QTOF	positive	354.095	C16H18O9	1	2	12	5	6	4	1.6	0	0	0.666667	1	0	0	80.4954	0.0007572	successful ranked
970	Chlorogenic acid	LC-ESI-QTOF	positive	354.095	C16H18O9	1	2	12	10	11	6	1.32727	0	0	0.545455	0	1	0	58.2258	0.0010665	successful ranked
971	Chlorogenic acid	LC-ESI-QTOF	positive	354.095	C16H18O9	6	11	12	14	7	1	1.19048	0	0	0.142857	0	1	0.0952381	42.3563	0.0009087	successful ranked
972	Chlorogenic acid	LC-ESI-QTOF	positive	354.095	C16H18O9	1	2	12	16	7	3	1.28571	0	0	0.428571	0	1	0	38.2849	0.0008497	successful ranked
973	Chlorogenic acid	LC-ESI-QTOF	positive	354.095	C16H18O9	1	2	12	14	9	4	1.25	0	0	0.444444	1	0	0	40.7055	0.0009793	successful ranked
974	Genistein	LC-ESI-QTOF (UPLC Q-Tof Premier; Waters)	positive	270.053	C15H10O5	3	3	8	6	1	0	0.959619	-1	0	-1	-1	-1	-1	0	0	No mother-daughter relation is found for all the precursor formula.
975	Genistein	LC-ESI-QTOF (UPLC Q-Tof Premier; Waters)	negative	270.053	C15H10O5	6	6	8	69	30	4	1.09606	0	1	0.137931	0	1	0.0147783	4.4211	0.0013198	successful ranked
976	Genistein	LC-ESI-QTOF (UPLC Q-Tof Premier; Waters)	positive	270.053	C15H10O5	1	1	8	56	30	19	1.33618	0	1	0.703704	1	1	0.179487	4.6571	0.0014876	successful ranked
977	Genistein	LC-ESI-QTOF (UPLC Q-Tof Premier; Waters)	positive	270.053	C15H10O5	1	1	8	22	20	11	1.30882	0	1	0.647059	1	0	0.0735294	9.17786	0.0011349	successful ranked
978	Genistein	LC-ESI-qTof	positive	270.053	C15H10O5	1	1	8	526	30	17	1.22759	0	1	0.566667	1	1	0.0758621	0.494824	0.0014381	successful ranked
979	Genistein	LC-ESI-qTof	positive	270.053	C15H10O5	1	1	8	533	30	19	1.3202	0	1	0.655172	1	1	0.150246	0.596375	0.0014331	successful ranked
980	Genistein	LC-ESI-QTOF	negative	270.053	C15H10O5	6	6	8	69	30	4	1.09606	0	1	0.137931	0	1	0.0147783	4.4211	0.001343	successful ranked
981	Genistein	LC-ESI-QTOF	positive	270.053	C15H10O5	5	8	8	10	9	0	1.08333	0	0	0	0	1	0.0277778	12.6528	0.0006313	successful ranked
982	Genistein	LC-ESI-QTOF	positive	270.053	C15H10O5	1	1	8	64	30	15	1.25616	0	1	0.517241	0	1	0.0566502	3.78583	0.0014462	successful ranked
983	Genistein	LC-ESI-QTOF	positive	270.053	C15H10O5	1	1	8	72	30	21	1.31217	0	1	0.75	1	1	0.156085	4.98133	0.001403	successful ranked
984	Genistein	LC-ESI-QTOF	positive	270.053	C15H10O5	1	1	8	7	4	0	0.999993	-1	0	-1	-1	-1	-1	11.9721	0.0003206	No mother-daughter relation is found for all the precursor formula.
985	Genistein	LC-ESI-QTOF	positive	270.053	C15H10O5	7	8	8	15	12	0	1.04545	0	0	0	0	0	0.0151515	12.6131	0.0006714	successful ranked
986	Genistein	LC-ESI-QTOF	positive	270.053	C15H10O5	6	6	8	40	37	3	1.04955	0	1	0.0810811	0	1	0.018018	4.086	0.0014369	successful ranked
987	Genistein	LC-ESI-QTOF	positive	270.053	C15H10O5	7	7	8	104	31	1	1.02796	0	1	0.0322581	0	0	0	1.72069	0.0012226	successful ranked
988	Genistein	LC-ESI-QTOF	positive	270.053	C15H10O5	2	2	8	166	30	7	1.06437	0	1	0.233333	0	1	0.0298851	1.31443	0.0012626	successful ranked
989	Genistein	LC-ESI-QTOF	positive	270.053	C15H10O5	1	1	8	56	30	19	1.33618	0	1	0.703704	1	1	0.179487	4.6571	0.0014865	successful ranked
990	Genistein	LC-ESI-QTOF	positive	270.053	C15H10O5	1	1	8	22	20	11	1.30882	0	1	0.647059	1	0	0.0735294	9.17786	0.0011194	successful ranked
991	Rutin	LC-ESI-QTOF (UPLC Q-Tof Premier; Waters)	positive	610.153	C27H30O16	6	6	13	15	9	2	1.19444	0	1	0.222222	0	1	0.0833333	65.4998	0.0009937	successful ranked
992	Rutin	LC-ESI-qTof	positive	610.153	C27H30O16	5	6	13	136	15	4	1.2	0	0	0.266667	0	1	0.047619	13.3598	0.0014208	successful ranked
993	Rutin	LC-ESI-QTOF	negative	610.153	C27H30O16	3	3	12	4	1	0	0.912107	-1	0	-1	-1	-1	-1	0	0	No mother-daughter relation is found for all the precursor formula.
994	Rutin	LC-ESI-QTOF	negative	610.153	C27H30O16	4	4	14	4	1	0	0.919867	-1	0	-1	-1	-1	-1	0	0	No mother-daughter relation is found for all the precursor formula.
995	Rutin	LC-ESI-QTOF	negative	610.153	C27H30O16	1	2	13	7	4	2	1.5	0	0	0.5	1	0	0	153.219	0.0006748	successful ranked
996	Rutin	LC-ESI-QTOF	negative	610.153	C27H30O16	2	2	13	12	9	5	1.52778	0	1	0.555556	0	1	0.111111	89.8072	0.0010975	successful ranked
997	Rutin	LC-ESI-QTOF	negative	610.153	C27H30O16	2	2	13	10	9	5	1.47222	0	1	0.555556	0	1	0.0555556	99.1221	0.0011721	successful ranked
998	Rutin	LC-ESI-QTOF	positive	610.153	C27H30O16	3	3	13	14	11	5	1.36364	0	1	0.454545	0	1	0.0545455	67.2737	0.0011901	successful ranked
999	Rutin	LC-ESI-QTOF	positive	610.153	C27H30O16	2	2	13	10	10	5	1.44444	0	1	0.5	0	1	0.111111	69.2618	0.0010859	successful ranked
1000	Rutin	LC-ESI-QTOF	positive	610.153	C27H30O16	1	1	13	7	8	5	1.53571	0	1	0.625	1	0	0.0357143	79.9348	0.0011026	successful ranked
1001	Rutin	LC-ESI-QTOF	positive	610.153	C27H30O16	2	3	13	7	8	4	1.5	0	0	0.5	0	1	0.142857	116.294	0.0011409	successful ranked
1002	Rutin	LC-ESI-QTOF	positive	610.153	C27H30O16	2	5	13	6	7	3	1.42857	0	0	0.428571	0	0	0.142857	126.182	0.0010438	successful ranked
1003	Rutin	LC-ESI-QTOF	positive	610.153	C27H30O16	1	1	13	5	5	3	1.6	0	1	0.6	1	1	0.3	66.851	0.0009089	successful ranked
1004	Rutin	LC-ESI-QTOF	positive	610.153	C27H30O16	1	1	13	6	5	3	1.6	0	1	0.6	1	0	0.1	77.7438	0.0008294	successful ranked
1005	Rutin	LC-ESI-QTOF	positive	610.153	C27H30O16	2	2	13	12	13	8	1.56061	0	1	0.666667	0	1	0.0606061	84.2522	0.0024498	successful ranked
1006	Rutin	LC-ESI-QTOF	positive	610.153	C27H30O16	10	13	13	19	7	0	1.38095	0	0	0	0	0	0.142857	50.0739	0.0016996	successful ranked
1007	Rutin	LC-ESI-QTOF	positive	610.153	C27H30O16	10	13	13	13	6	0	1.33333	0	0	0	0	1	0.0666667	56.3858	0.0015945	successful ranked
1008	Rutin	LC-ESI-QTOF	positive	610.153	C27H30O16	8	13	13	8	5	0	1.4	0	0	0	0	0	0.1	82.642	0.0012832	successful ranked
1009	Hesperidin	LC-ESI-qTof	positive	610.19	C28H34O15	3	3	13	1000	30	19	1.34943	0	1	0.633333	0	1	0.0482759	1.73239	0.0023191	successful ranked
1010	Hesperidin	LC-ESI-QTOF	negative	610.19	C28H34O15	1	6	13	6	3	1	1.33333	0	0	0.333333	1	0	0	216.448	0.0006171	successful ranked
1011	Hesperidin	LC-ESI-QTOF	negative	610.19	C28H34O15	5	7	13	7	4	1	1.5	0	0	0.25	0	1	0.166667	176.151	0.0007493	successful ranked
1012	Hesperidin	LC-ESI-QTOF	negative	610.19	C28H34O15	2	3	13	8	6	3	1.46667	0	0	0.5	0	0	0.0666667	114.709	0.0009718	successful ranked
1013	Hesperidin	LC-ESI-QTOF	negative	610.19	C28H34O15	3	3	13	7	7	4	1.52381	0	1	0.571429	0	0	0	97.4067	0.0009442	successful ranked
1014	Hesperidin	LC-ESI-QTOF	negative	610.19	C28H34O15	2	3	13	14	15	11	1.61905	0	0	0.733333	0	1	0.047619	69.5423	0.0015326	successful ranked
1015	Hesperidin	LC-ESI-QTOF	negative	610.19	C28H34O15	7	10	13	6	6	1	1.46667	0	0	0.166667	0	1	0.266667	116.931	0.0008808	successful ranked
1016	Hesperidin	LC-ESI-QTOF	positive	610.19	C28H34O15	1	1	13	26	23	15	1.45059	0	1	0.652174	1	1	0.197628	30.2384	0.0019457	successful ranked
1017	Hesperidin	LC-ESI-QTOF	positive	610.19	C28H34O15	1	1	13	20	21	12	1.36667	0	1	0.571429	0	1	0.138095	41.3143	0.0018966	successful ranked
1018	Hesperidin	LC-ESI-QTOF	positive	610.19	C28H34O15	1	1	13	16	17	14	1.73529	0	1	0.823529	1	1	0.294118	35.167	0.0016343	successful ranked
1019	Hesperidin	LC-ESI-QTOF	positive	610.19	C28H34O15	2	2	13	16	17	14	1.72794	0	1	0.823529	0	1	0.0661765	57.1604	0.001643	successful ranked
1020	Hesperidin	LC-ESI-QTOF	positive	610.19	C28H34O15	3	3	13	19	20	15	1.52105	0	1	0.75	0	0	0.0105263	68.4156	0.0018225	successful ranked
1021	Hesperidin	LC-ESI-QTOF	positive	610.19	C28H34O15	8	8	13	18	18	3	1.23333	0	0	0.1875	0	1	0.0166667	31.7012	0.001648	successful ranked
1022	Phloretin	LC-ESI-QTOF	negative	274.084	C15H14O5	1	1	7	9	9	6	1.57143	0	1	0.75	1	1	0.357143	21.5935	0.0006716	successful ranked
1023	Phloretin	LC-ESI-QTOF	negative	274.084	C15H14O5	1	1	7	16	16	9	1.29524	0	1	0.6	1	1	0.180952	11.4459	0.0008912	successful ranked
1024	Phloretin	LC-ESI-QTOF	negative	274.084	C15H14O5	1	1	7	65	30	17	1.24923	0	1	0.653846	1	1	0.113846	5.23872	0.0018287	successful ranked
1025	Phloretin	LC-ESI-QTOF	positive	274.084	C15H14O5	1	3	7	8	6	3	1.26667	0	0	0.5	0	1	0	41.3606	0.0005532	successful ranked
1026	Phloretin	LC-ESI-QTOF	positive	274.084	C15H14O5	4	5	7	4	5	1	1.3	0	0	0.2	0	0	0.1	46.037	0.0005169	successful ranked
1027	Phloretin	LC-ESI-QTOF	positive	274.084	C15H14O5	2	2	7	7	8	4	1.39286	0	1	0.5	0	1	0.0357143	35.969	0.0009426	successful ranked
1028	Phloretin	LC-ESI-QTOF	positive	274.084	C15H14O5	2	2	7	8	9	5	1.5	0	1	0.625	0	1	0.0357143	50.623	0.000978	successful ranked
1029	Phloretin	LC-ESI-QTOF	positive	274.084	C15H14O5	1	1	7	13	13	5	1.24444	0	1	0.5	1	0	0.0888889	21.8914	0.000799	successful ranked
1030	Phloretin	LC-ESI-QTOF	positive	274.084	C15H14O5	1	1	7	7	8	4	1.6	0	1	0.666667	1	1	0.266667	37.2877	0.0008594	successful ranked
1031	Phloretin	LC-ESI-QTOF	positive	274.084	C15H14O5	3	3	7	5	6	1	1.66667	0	1	0.333333	0	0	0	75.0963	0.000498	successful ranked
1032	Daidzein	LC-ESI-QTOF (UPLC Q-Tof Premier; Waters)	positive	254.058	C15H10O4	1	1	7	4	1	0	0.999994	-1	0	-1	-1	-1	-1	0	0	No mother-daughter relation is found for all the precursor formula.
1033	Daidzein	LC-ESI-QTOF (UPLC Q-Tof Premier; Waters)	negative	254.058	C15H10O4	1	1	7	14	13	12	1.80769	0	1	0.923077	1	1	0.217949	15.9371	0.0008033	successful ranked
1034	Daidzein	LC-ESI-QTOF (UPLC Q-Tof Premier; Waters)	negative	254.058	C15H10O4	4	4	7	77	30	2	1.03623	0	1	0.0833333	0	0	0.00724638	3.72741	0.0020588	successful ranked
1035	Daidzein	LC-ESI-QTOF (UPLC Q-Tof Premier; Waters)	positive	254.058	C15H10O4	2	2	7	51	30	14	1.30769	0	1	0.518519	0	1	0.0883191	4.36977	0.0021252	successful ranked
1036	Daidzein	LC-ESI-QTOF (UPLC Q-Tof Premier; Waters)	positive	254.058	C15H10O4	2	2	7	24	22	11	1.31373	0	1	0.611111	0	1	0.0457516	8.15715	0.0011564	successful ranked
1037	Daidzein	LC-ESI-QTOF (UPLC Q-Tof Premier; Waters)	positive	254.058	C15H10O4	5	7	7	10	10	0	1.22222	0	0	0	0	1	0.0888889	11.2036	0.0006634	successful ranked
1038	Daidzein	LC-ESI-QTOF (UPLC Q-Tof Premier; Waters)	negative	254.058	C15H10O4	7	7	7	13	11	0	1.14545	0	1	0	0	1	0.127273	16.6168	0.0006587	successful ranked
1039	Daidzein	LC-ESI-QTOF (UPLC Q-Tof Premier; Waters)	negative	254.058	C15H10O4	1	1	7	19	19	18	1.76608	0	1	0.947368	1	1	0.304094	10.3391	0.0017238	successful ranked
1040	Daidzein	LC-ESI-qTof	positive	254.058	C15H10O4	2	2	7	50	30	14	1.24368	0	1	0.466667	0	1	0.0965517	3.33125	0.0013453	successful ranked
1041	Daidzein	LC-ESI-qTof	positive	254.058	C15H10O4	1	1	7	908	30	19	1.29557	0	1	0.655172	1	1	0.123153	0.401482	0.0021418	successful ranked
1042	Daidzein	LC-ESI-QTOF	negative	254.058	C15H10O4	7	7	7	8	8	0	1.21429	0	1	0	0	1	0.178571	21.4142	0.0008807	successful ranked
1043	Daidzein	LC-ESI-QTOF	negative	254.058	C15H10O4	7	7	7	45	30	2	1.06437	0	1	0.0666667	0	1	0.0183908	5.69013	0.0011666	successful ranked
1044	Daidzein	LC-ESI-QTOF	negative	254.058	C15H10O4	7	7	7	39	30	2	1.05231	0	1	0.0769231	0	0	0.00307692	5.71125	0.0018581	successful ranked
1045	Daidzein	LC-ESI-QTOF	negative	254.058	C15H10O4	1	1	7	14	13	12	1.80769	0	1	0.923077	1	1	0.217949	15.9371	0.0008363	successful ranked
1046	Daidzein	LC-ESI-QTOF	negative	254.058	C15H10O4	4	4	7	77	30	2	1.03623	0	1	0.0833333	0	0	0.00724638	3.72741	0.0012103	successful ranked
1047	Daidzein	LC-ESI-QTOF	negative	254.058	C15H10O4	7	7	7	13	11	0	1.14545	0	1	0	0	1	0.127273	16.6168	0.0011158	successful ranked
1048	Daidzein	LC-ESI-QTOF	negative	254.058	C15H10O4	1	1	7	19	19	18	1.76608	0	1	0.947368	1	1	0.304094	10.3391	0.0010553	successful ranked
1049	Daidzein	LC-ESI-QTOF	positive	254.058	C15H10O4	1	1	8	3	1	0	0.857839	-1	0	-1	-1	-1	-1	0.147655	0	No mother-daughter relation is found for all the precursor formula.
1050	Daidzein	LC-ESI-QTOF	positive	254.058	C15H10O4	7	7	7	11	10	1	1.15556	0	1	0.1	0	0	0	8.02468	0.0007342	successful ranked
1051	Daidzein	LC-ESI-QTOF	positive	254.058	C15H10O4	1	1	7	65	30	16	1.15079	0	1	0.571429	1	1	0.0608466	3.68452	0.0012411	successful ranked
1052	Daidzein	LC-ESI-QTOF	positive	254.058	C15H10O4	1	1	7	58	30	17	1.19212	0	1	0.586207	1	1	0.0541872	4.79574	0.0013169	successful ranked
1053	Daidzein	LC-ESI-QTOF	positive	254.058	C15H10O4	2	2	7	51	30	14	1.30769	0	1	0.518519	0	1	0.0883191	4.36977	0.0013258	successful ranked
1054	Daidzein	LC-ESI-QTOF	positive	254.058	C15H10O4	2	2	7	24	22	11	1.31373	0	1	0.611111	0	1	0.0457516	8.15715	0.0010734	successful ranked
1055	Daidzein	LC-ESI-QTOF	positive	254.058	C15H10O4	5	7	7	10	10	0	1.22222	0	0	0	0	1	0.0888889	11.2036	0.000631	successful ranked
1056	Indole-3-carboxylic acid	LC-ESI-QTOF (UPLC Q-Tof Premier; Waters)	negative	161.048	C9H7NO2	1	2	4	6	5	1	1.33333	0	0	0.333333	1	0	0	17.3973	0.0002594	successful ranked
1057	Indole-3-carboxylic acid	LC-ESI-QTOF (UPLC Q-Tof Premier; Waters)	positive	161.048	C9H7NO2	2	2	4	7	7	5	1.73333	0	0	0.833333	1	0	0	12.1786	0.0003953	successful ranked
1058	Indole-3-carboxylic acid	LC-ESI-qToF	positive	161.048	C9H7NO2	1	1	4	36	22	7	1.08658	0	1	0.318182	1	1	0.047619	3.91085	0.0005442	successful ranked
1059	Indole-3-carboxylic acid	LC-ESI-QTOF	negative	161.048	C9H7NO2	1	2	4	6	5	1	1.33333	0	0	0.333333	1	0	0	17.3973	0.0003067	successful ranked
1060	Indole-3-carboxylic acid	LC-ESI-QTOF	positive	161.048	C9H7NO2	1	2	4	4	4	1	1.16667	0	0	0.25	1	0	0	12.2031	0.00024	successful ranked
1061	Indole-3-carboxylic acid	LC-ESI-QTOF	positive	161.048	C9H7NO2	2	4	4	7	7	0	1.14286	0	0	0	0	1	0.142857	12.1776	0.0003515	successful ranked
1062	Indole-3-carboxylic acid	LC-ESI-QTOF	positive	161.048	C9H7NO2	2	2	4	8	9	1	1.09524	0	1	0.142857	0	1	0.047619	12.1161	0.0003428	successful ranked
1063	Indole-3-carboxylic acid	LC-ESI-QTOF	positive	161.048	C9H7NO2	1	2	4	8	9	3	1.21429	0	0	0.375	1	0	0	16.5523	0.0003931	successful ranked
1064	Indole-3-carboxylic acid	LC-ESI-QTOF	positive	161.048	C9H7NO2	1	3	4	21	8	1	1.03571	0	0	0.125	1	0	0	5.12618	0.0002807	successful ranked
1065	Indole-3-carboxylic acid	LC-ESI-QTOF	positive	161.048	C9H7NO2	1	1	4	15	8	0	0.999999	-1	0	-1	-1	-1	-1	5.36891	0.0002312	No mother-daughter relation is found for all the precursor formula.
1066	Indole-3-carboxylic acid	LC-ESI-QTOF	positive	161.048	C9H7NO2	1	1	4	34	9	0	0.999999	-1	0	-1	-1	-1	-1	3.49247	0.0002465	No mother-daughter relation is found for all the precursor formula.
1067	Indole-3-carboxylic acid	LC-ESI-QTOF	positive	161.048	C9H7NO2	2	2	4	7	7	5	1.73333	0	0	0.833333	1	0	0	12.1786	0.0004009	successful ranked
1068	Oxidized glutathione	LC-ESI-QTOF	negative	612.152	C20H32N6O12S2	3	4	5	14	14	3	1.14103	1	0	0.230769	0	0	0	68.5426	0.0005522	successful ranked
1069	Oxidized glutathione	LC-ESI-QTOF	positive	612.152	C20H32N6O12S2	2	5	5	3	2	0	2	0	0	0	0	1	1	90.8211	0.0002134	successful ranked
1070	Oxidized glutathione	LC-ESI-QTOF	positive	612.152	C20H32N6O12S2	1	1	5	4	2	0	0.999996	-1	0	-1	-1	-1	-1	74.247	0.0001886	No mother-daughter relation is found for all the precursor formula.
1071	5-Aminopentanoic acid	LC-ESI-QTOF (UPLC Q-Tof Premier; Waters)	positive	117.079	C5H11NO2	1	1	1	6	6	-1	0.999999	-1	-1	-1	-1	-1	-1	11.359	-1	Single candidate matches with the answer.
1072	5-Aminopentanoic acid	LC-ESI-QTOF (UPLC Q-Tof Premier; Waters)	negative	117.079	C5H11NO2	1	1	1	3	2	-1	0.999999	-1	-1	-1	-1	-1	-1	9.19114	-1	Single candidate matches with the answer.
1073	5-Aminopentanoic acid	LC-ESI-QTOF	negative	117.079	C5H11NO2	1	1	1	3	2	-1	0.999999	-1	-1	-1	-1	-1	-1	9.19114	-1	Single candidate matches with the answer.
1074	5-Aminopentanoic acid	LC-ESI-QTOF	positive	117.079	C5H11NO2	1	1	1	6	6	-1	0.999999	-1	-1	-1	-1	-1	-1	11.359	-1	Single candidate matches with the answer.
1075	N-Acetylornithine	LC-ESI-QTOF	negative	174.1	C7H14N2O3	1	1	1	3	3	-1	0.999998	-1	-1	-1	-1	-1	-1	23.7038	-1	Single candidate matches with the answer.
1076	N-Acetylornithine	LC-ESI-QTOF	positive	174.1	C7H14N2O3	1	1	1	9	9	-1	0.999998	-1	-1	-1	-1	-1	-1	17.1653	-1	Single candidate matches with the answer.
1077	N-Acetylornithine	LC-ESI-QTOF	positive	174.1	C7H14N2O3	1	1	1	9	9	-1	0.999998	-1	-1	-1	-1	-1	-1	17.1653	-1	Single candidate matches with the answer.
1078	D-Lysine	LC-ESI-QTOF (UPLC Q-Tof Premier; Waters)	positive	146.106	C6H14N2O2	1	1	1	3	3	-1	0.999998	-1	-1	-1	-1	-1	-1	20.4916	-1	Single candidate matches with the answer.
1079	D-Lysine	LC-ESI-QTOF (UPLC Q-Tof Premier; Waters)	positive	146.106	C6H14N2O2	1	1	1	5	5	-1	0.999998	-1	-1	-1	-1	-1	-1	18.9113	-1	Single candidate matches with the answer.
1080	D-Lysine	LC-ESI-QTOF	positive	146.106	C6H14N2O2	1	1	1	3	3	-1	0.999998	-1	-1	-1	-1	-1	-1	20.4916	-1	Single candidate matches with the answer.
1081	D-Lysine	LC-ESI-QTOF	positive	146.106	C6H14N2O2	1	1	1	5	5	-1	0.999998	-1	-1	-1	-1	-1	-1	18.9113	-1	Single candidate matches with the answer.
1082	Berberine	LC-ESI-QTOF	positive	336.124	C20H18NO4	4	6	6	11	8	0	1.03571	0	0	0	0	0	0	6.53726	0.0004132	successful ranked
1083	Berberine	LC-ESI-QTOF	positive	336.124	C20H18NO4	2	6	6	17	14	0	1.01099	0	0	0	0	1	0.010989	5.03715	0.000446	successful ranked
1084	Berberine	LC-ESI-QTOF	positive	336.124	C20H18NO4	2	6	6	24	14	0	1.01099	0	0	0	0	1	0.010989	4.37695	0.0004312	successful ranked
1085	Berberine	LC-ESI-QTOF	positive	336.124	C20H18NO4	5	6	6	44	23	0	1.01186	0	0	0	0	1	0.00790514	3.77341	0.0007217	successful ranked
1086	Boldione	LC-ESI-qTof	positive	284.178	C19H24O2	3	3	4	850	31	3	1.15873	0	1	0.107143	0	1	0.103175	0.54212	0.0007101	successful ranked
1087	L-Histidinol	LC-ESI-QTOF (UPLC Q-Tof Premier; Waters)	positive	141.09	C6H11N3O	1	1	1	5	5	-1	0.999999	-1	-1	-1	-1	-1	-1	11.5173	-1	Single candidate matches with the answer.
1088	L-Histidinol	LC-ESI-QTOF	positive	141.09	C6H11N3O	1	1	1	5	5	-1	0.999999	-1	-1	-1	-1	-1	-1	11.5173	-1	Single candidate matches with the answer.
1089	Cinnamaldehyde	LC-ESI-QTOF (UPLC Q-Tof Premier; Waters)	positive	132.058	C9H8O	2	2	3	9	9	6	1.95238	0	0	0.857143	1	0	0	7.13014	0.0003437	successful ranked
1090	Cinnamaldehyde	LC-ESI-QTOF	positive	132.058	C9H8O	2	2	3	9	9	6	1.95238	0	0	0.857143	1	0	0	7.13014	0.0002851	successful ranked
1091	D-Alanyl-D-alanine	LC-ESI-QTOF	positive	160.085	C6H12N2O3	1	1	1	3	3	-1	0.999999	-1	-1	-1	-1	-1	-1	14.8318	-1	Single candidate matches with the answer.
1092	3*4-Dihydroxy-trans-cinnamate	LC-ESI-QTOF (UPLC Q-Tof Premier; Waters)	negative	180.042	C9H8O4	1	1	3	12	12	5	1.86667	0	1	0.833333	1	1	0.266667	13.2171	0.0003229	successful ranked
1093	3*4-Dihydroxy-trans-cinnamate	LC-ESI-QTOF (UPLC Q-Tof Premier; Waters)	negative	180.042	C9H8O4	1	2	3	10	11	5	1.86667	0	0	0.833333	1	0	0	14.1333	0.0002833	successful ranked
1094	3*4-Dihydroxy-trans-cinnamate	LC-ESI-QTOF (UPLC Q-Tof Premier; Waters)	negative	180.042	C9H8O4	2	3	3	13	14	0	1.03571	0	0	0	0	1	0.0357143	11.8487	0.0003034	successful ranked
1095	3*4-Dihydroxy-trans-cinnamate	LC-ESI-QTOF (UPLC Q-Tof Premier; Waters)	positive	180.042	C9H8O4	1	1	3	14	14	8	1.38462	0	1	0.615385	1	1	0.0897436	7.9519	0.0003972	successful ranked
1096	3*4-Dihydroxy-trans-cinnamate	LC-ESI-QTOF (UPLC Q-Tof Premier; Waters)	positive	180.042	C9H8O4	3	3	3	10	11	0	1.1	0	1	0	0	0	0	14.0156	0.000317	successful ranked
1097	3*4-Dihydroxy-trans-cinnamate	LC-ESI-QTOF (UPLC Q-Tof Premier; Waters)	positive	180.042	C9H8O4	1	1	3	14	14	8	1.45455	0	1	0.727273	1	1	0.145455	6.39526	0.0003833	successful ranked
1098	3*4-Dihydroxy-trans-cinnamate	LC-ESI-QTOF (UPLC Q-Tof Premier; Waters)	negative	180.042	C9H8O4	1	2	3	3	3	2	2	0	0	0.666667	1	0	0	25.1115	0.0001842	successful ranked
1099	3*4-Dihydroxy-trans-cinnamate	LC-ESI-QTOF	negative	180.042	C9H8O4	1	1	3	12	12	5	1.86667	0	1	0.833333	1	1	0.266667	13.2171	0.0003357	successful ranked
1100	3*4-Dihydroxy-trans-cinnamate	LC-ESI-QTOF	negative	180.042	C9H8O4	1	2	3	10	11	5	1.86667	0	0	0.833333	1	0	0	14.1333	0.0002818	successful ranked
1101	3*4-Dihydroxy-trans-cinnamate	LC-ESI-QTOF	negative	180.042	C9H8O4	2	3	3	13	14	0	1.03571	0	0	0	0	1	0.0357143	11.8487	0.0002876	successful ranked
1102	3*4-Dihydroxy-trans-cinnamate	LC-ESI-QTOF	negative	180.042	C9H8O4	1	2	3	3	3	2	2	0	0	0.666667	1	0	0	25.1115	0.0001846	successful ranked
1103	3*4-Dihydroxy-trans-cinnamate	LC-ESI-QTOF	positive	180.042	C9H8O4	1	1	3	14	14	8	1.38462	0	1	0.615385	1	1	0.0897436	7.9519	0.0005438	successful ranked
1104	3*4-Dihydroxy-trans-cinnamate	LC-ESI-QTOF	positive	180.042	C9H8O4	3	3	3	10	11	0	1.1	0	1	0	0	0	0	14.0156	0.0002999	successful ranked
1105	3*4-Dihydroxy-trans-cinnamate	LC-ESI-QTOF	positive	180.042	C9H8O4	1	1	3	14	14	8	1.45455	0	1	0.727273	1	1	0.145455	6.39526	0.0003861	successful ranked
1106	Alpha-D-Glucose 1*6-bisphosphate	LC-ESI-QTOF	negative	339.996	C6H14O12P2	1	1	7	9	9	4	1.42857	0	1	0.571429	1	0	0.0952381	20.1409	0.0006309	successful ranked
1107	3'-AMP	LC-ESI-QTOF	negative	347.063	C10H14N5O7P	1	1	7	5	5	3	1.6	1	1	0.6	1	1	0.3	53.8344	0.0004955	successful ranked
1108	3'-AMP	LC-ESI-QTOF	positive	347.063	C10H14N5O7P	5	7	7	3	3	0	1.33333	1	0	0	0	0	0	137.873	0.0003323	successful ranked
1109	Rosmarinic acid	LC-ESI-QTOF	negative	360.085	C18H16O8	1	1	12	13	12	8	1.50909	0	1	0.727273	1	0	0.0727273	46.0354	0.0011909	successful ranked
1110	Rosmarinic acid	LC-ESI-QTOF	negative	360.085	C18H16O8	1	1	12	10	8	6	1.64286	0	1	0.75	1	0	0.142857	54.67	0.0009046	successful ranked
1111	Rosmarinic acid	LC-ESI-QTOF	negative	360.085	C18H16O8	11	12	12	18	19	0	1.08974	0	0	0	0	1	0.0384615	38.3761	0.0014955	successful ranked
1112	Rosmarinic acid	LC-ESI-QTOF	negative	360.085	C18H16O8	12	12	12	10	9	0	1.4	0	1	0	0	0	0	54.6438	0.001148	successful ranked
1113	Rosmarinic acid	LC-ESI-QTOF	negative	360.085	C18H16O8	1	1	12	9	9	8	1.77778	0	1	0.888889	1	1	0.166667	51.3259	0.0011928	successful ranked
1114	Rosmarinic acid	LC-ESI-QTOF	positive	360.085	C18H16O8	2	2	12	13	11	6	1.4	0	1	0.545455	0	1	0.0363636	40.6232	0.0011788	successful ranked
1115	Rosmarinic acid	LC-ESI-QTOF	positive	360.085	C18H16O8	1	1	12	16	17	12	1.4	0	1	0.75	1	1	0.0916667	43.9995	0.0014351	successful ranked
1116	Rosmarinic acid	LC-ESI-QTOF	positive	360.085	C18H16O8	8	11	12	10	8	2	1.28571	0	0	0.25	0	0	0.0714286	50.19	0.001029	successful ranked
1117	Dethiobiotin	LC-ESI-qTof	positive	214.132	C10H18N2O3	1	1	1	158	32	-1	0.999998	-1	-1	-1	-1	-1	-1	2.20382	-1	Single candidate matches with the answer.
1118	Mesna	LC-ESI-QTOF	negative	141.976	C2H6O3S2	1	2	4	4	3	2	2	0	0	0.666667	1	0	0	29.792	0.0002379	successful ranked
1119	Resveratrol	LC-ESI-qTof	positive	228.079	C14H12O3	1	1	6	118	30	14	1.23385	0	1	0.538462	1	1	0.101538	2.61953	0.0010371	successful ranked
1120	Resveratrol	LC-ESI-qTof	positive	228.079	C14H12O3	2	2	6	172	32	12	1.10769	0	1	0.461538	1	0	0.00307692	1.83349	0.0010989	successful ranked
1121	Resveratrol	LC-ESI-QTOF	negative	228.079	C14H12O3	1	4	6	3	3	1	1.33333	0	0	0.333333	1	0	0	21.2054	0.0003222	successful ranked
1122	Resveratrol	LC-ESI-QTOF	negative	228.079	C14H12O3	1	1	6	17	17	7	1.13971	0	1	0.411765	1	1	0.0588235	10.3565	0.0006808	successful ranked
1123	Resveratrol	LC-ESI-QTOF	negative	228.079	C14H12O3	1	2	6	17	18	7	1.11765	0	0	0.411765	1	1	0	11.3426	0.0007256	successful ranked
1124	Resveratrol	LC-ESI-QTOF	negative	228.079	C14H12O3	2	2	6	24	25	6	1.22105	0	1	0.3	0	1	0.121053	10.213	0.0009092	successful ranked
1125	Resveratrol	LC-ESI-QTOF	positive	228.079	C14H12O3	2	2	6	8	7	4	1.42857	0	1	0.571429	1	0	0.047619	15.9342	0.0004904	successful ranked
1126	Resveratrol	LC-ESI-QTOF	positive	228.079	C14H12O3	1	1	6	39	30	13	1.14023	0	1	0.433333	0	0	0.0275862	3.95007	0.0010248	successful ranked
1127	Resveratrol	LC-ESI-QTOF	positive	228.079	C14H12O3	1	1	6	52	30	15	1.21231	0	1	0.576923	1	1	0.0707692	4.15669	0.0010537	successful ranked
1128	Resveratrol	LC-ESI-QTOF	positive	228.079	C14H12O3	1	1	6	60	30	15	1.24	0	1	0.576923	0	1	0.0646154	6.28922	0.001078	successful ranked
1129	Resveratrol	LC-ESI-QTOF	positive	228.079	C14H12O3	2	2	6	47	31	10	1.12258	0	1	0.322581	0	1	0.0365591	3.42161	0.0010049	successful ranked
1130	Resveratrol	LC-ESI-QTOF	positive	228.079	C14H12O3	1	1	6	185	31	11	1.06667	0	1	0.354839	1	1	0.0172043	1.00763	0.0010553	successful ranked
1131	Resveratrol	LC-ESI-QTOF	positive	228.079	C14H12O3	2	2	6	175	30	12	1.2069	0	1	0.4	0	1	0.124138	1.01805	0.0009357	successful ranked
1132	LysoPC(10:0)	LC-ESI-QTOF	positive	412.246	C18H39NO7P	2	5	5	10	10	0	1.14286	0	0	0	0	1	0.142857	47.6652	0.0005054	successful ranked
1133	Protopine	LC-ESI-QTOF	positive	353.126	C20H19NO5	3	3	10	11	11	3	1.2	0	1	0.272727	0	0	0.0363636	15.5594	0.0007958	successful ranked
1134	Protopine	LC-ESI-QTOF	positive	353.126	C20H19NO5	1	1	10	50	31	16	1.16559	0	1	0.516129	1	1	0.0580645	5.34678	0.001679	successful ranked
1135	Protopine	LC-ESI-QTOF	positive	353.126	C20H19NO5	3	3	10	46	31	13	1.09677	0	1	0.419355	0	1	0.00645161	6.40294	0.001642	successful ranked
1136	L-Allothreonine	LC-ESI-QTOF (UPLC Q-Tof Premier; Waters)	positive	119.058	C4H9NO3	1	1	1	5	5	-1	0.999999	-1	-1	-1	-1	-1	-1	4.0126	-1	Single candidate matches with the answer.
1137	L-Allothreonine	LC-ESI-QTOF (UPLC Q-Tof Premier; Waters)	positive	119.058	C4H9NO3	1	1	1	5	5	-1	0.999999	-1	-1	-1	-1	-1	-1	4.0133	-1	Single candidate matches with the answer.
1138	L-Allothreonine	LC-ESI-QTOF	positive	119.058	C4H9NO3	1	1	1	5	5	-1	0.999999	-1	-1	-1	-1	-1	-1	4.0126	-1	Single candidate matches with the answer.
1139	L-Allothreonine	LC-ESI-QTOF	positive	119.058	C4H9NO3	1	1	1	5	5	-1	0.999999	-1	-1	-1	-1	-1	-1	4.0133	-1	Single candidate matches with the answer.
1140	6-Hydroxymelatonin	LC-ESI-qTof	positive	248.116	C13H16N2O3	1	1	2	811	30	17	1.32	0	1	0.653846	1	1	0.255385	0.815266	0.0004486	successful ranked
1141	5-Methoxyindoleacetate	LC-ESI-QTOF	positive	205.074	C11H11NO3	1	2	2	3	2	1	2	0	0	0.5	1	0	0	32.5282	0.0001317	successful ranked
1142	5-Methoxyindoleacetate	LC-ESI-QTOF	positive	205.074	C11H11NO3	1	2	2	3	3	1	1.33333	0	0	0.333333	1	0	0	25.696	0.0001331	successful ranked
1143	5-Methoxyindoleacetate	LC-ESI-QTOF	positive	205.074	C11H11NO3	2	2	2	10	11	5	1.18182	0	1	0.454545	0	1	0.0181818	13.54	0.0002834	successful ranked
1144	5-Methoxyindoleacetate	LC-ESI-QTOF	positive	205.074	C11H11NO3	1	1	2	29	29	14	1.12963	0	1	0.5	0	1	0.0291005	9.9686	0.000476	successful ranked
1145	5-Methoxyindoleacetate	LC-ESI-QTOF	positive	205.074	C11H11NO3	1	1	2	30	30	13	1.17391	0	1	0.541667	1	1	0.057971	9.10951	0.0005448	successful ranked
1146	5-Methoxyindoleacetate	LC-ESI-QTOF	positive	205.074	C11H11NO3	1	1	2	40	30	12	1.16	0	1	0.48	0	1	0.0633333	7.75685	0.0004744	successful ranked
1147	Pantothenol	LC-ESI-QTOF	negative	205.131	C9H19NO4	1	1	1	24	22	-1	0.999998	-1	-1	-1	-1	-1	-1	7.88773	-1	Single candidate matches with the answer.
1148	Pantothenol	LC-ESI-QTOF	negative	205.131	C9H19NO4	1	1	1	24	24	-1	0.999998	-1	-1	-1	-1	-1	-1	6.6614	-1	Single candidate matches with the answer.
1149	Pantothenol	LC-ESI-QTOF	positive	205.131	C9H19NO4	1	1	1	7	7	-1	0.999998	-1	-1	-1	-1	-1	-1	19.156	-1	Single candidate matches with the answer.
1150	Diethanolamine	LC-ESI-QTOF (UPLC Q-Tof Premier; Waters)	positive	105.079	C4H11NO2	1	1	1	3	2	-1	0.999999	-1	-1	-1	-1	-1	-1	12.6534	-1	Single candidate matches with the answer.
1151	Diethanolamine	LC-ESI-QTOF	positive	105.079	C4H11NO2	1	1	1	3	2	-1	0.999999	-1	-1	-1	-1	-1	-1	12.6534	-1	Single candidate matches with the answer.
1152	Benzocaine	LC-ESI-qTof	positive	165.079	C9H11NO2	1	1	2	367	31	8	1.15789	0	1	0.421053	0	1	0.00584795	0.959605	0.0004057	successful ranked
1153	Codeine	LC-ESI-QTOF	positive	299.152	C18H21NO3	1	1	4	3	1	0	0.999998	-1	0	-1	-1	-1	-1	0	0	No mother-daughter relation is found for all the precursor formula.
1154	Codeine	LC-ESI-QTOF	positive	299.152	C18H21NO3	2	2	4	7	5	3	1.5	0	0	0.6	1	0	0	12.4456	0.0003613	successful ranked
1155	Codeine	LC-ESI-QTOF	positive	299.152	C18H21NO3	1	1	4	68	30	15	1.16322	0	1	0.5	0	1	0.00689655	3.33106	0.0007641	successful ranked
1156	Codeine	LC-ESI-QTOF	positive	299.152	C18H21NO3	1	1	4	219	30	26	1.57471	0	1	0.866667	1	1	0.358621	1.43438	0.0008308	successful ranked
1157	Codeine	LC-ESI-QTOF	positive	299.152	C18H21NO3	1	1	4	190	30	25	1.53333	0	1	0.833333	1	1	0.42069	1.9949	0.000732	successful ranked
1158	Guaifenesin	LC-ESI-qTof	positive	198.089	C10H14O4	2	2	3	126	32	7	1.08333	0	1	0.28	0	1	0.00333333	1.98349	0.0005658	successful ranked
1159	Simvastatin	LC-ESI-qTof	positive	418.272	C25H38O5	4	4	4	300	30	3	1.08995	0	0	0.107143	0	1	0.0238095	4.44092	0.0007071	successful ranked
1160	Simvastatin	LC-ESI-qTof	positive	418.272	C25H38O5	4	4	4	300	30	3	1.08995	0	0	0.107143	0	1	0.0238095	4.44092	0.0006806	successful ranked
1161	Simvastatin	LC-ESI-QTOF	positive	418.272	C25H38O5	1	1	4	7	7	5	1.71429	0	1	0.714286	1	1	0.428571	32.4788	0.0003443	successful ranked
1162	Simvastatin	LC-ESI-QTOF	positive	418.272	C25H38O5	2	3	4	10	11	1	1.26667	0	0	0.1	0	1	0.244444	38.5349	0.0004182	successful ranked
1163	Simvastatin	LC-ESI-QTOF	positive	418.272	C25H38O5	2	3	4	9	10	6	1.42222	0	0	0.6	0	1	0.0666667	55.7113	0.000406	successful ranked
1164	Simvastatin	LC-ESI-QTOF	positive	418.272	C25H38O5	1	1	4	9	10	8	1.64444	0	1	0.8	1	1	0.0222222	61.3793	0.0004173	successful ranked
1165	Simvastatin	LC-ESI-QTOF	positive	418.272	C25H38O5	1	2	4	12	13	10	1.98182	0	0	0.909091	1	0	0	54.0596	0.00046	successful ranked
1166	Olanzapine	LC-ESI-qTof	positive	312.141	C17H20N4S	1	1	6	382	30	15	1.19312	0	1	0.535714	1	1	0.137566	1.98404	0.001053	successful ranked
1167	Olanzapine	LC-ESI-qTof	positive	312.141	C17H20N4S	1	1	6	405	30	14	1.14286	0	1	0.5	1	0	0.0820106	2.60207	0.0010302	successful ranked
1168	Olanzapine	LC-ESI-qTof	positive	312.141	C17H20N4S	2	2	6	1000	32	11	1.12702	0	1	0.34375	0	1	0.0584677	0.424707	0.0010876	successful ranked
1169	Olanzapine	LC-ESI-QTOF	positive	312.141	C17H20N4S	3	6	6	5	3	1	1.33333	0	0	0.333333	1	0	0	37.4954	0.0003052	successful ranked
1170	Olanzapine	LC-ESI-QTOF	positive	312.141	C17H20N4S	2	3	6	11	9	3	1.22222	0	0	0.333333	0	1	0.111111	12.4429	0.00047	successful ranked
1171	Olanzapine	LC-ESI-QTOF	positive	312.141	C17H20N4S	3	3	6	29	27	10	1.17949	0	1	0.37037	0	1	0.048433	7.4861	0.0009674	successful ranked
1172	Olanzapine	LC-ESI-QTOF	positive	312.141	C17H20N4S	2	2	6	58	30	13	1.17011	0	1	0.433333	0	1	0.0436782	4.88953	0.0011394	successful ranked
1173	Olanzapine	LC-ESI-QTOF	positive	312.141	C17H20N4S	3	3	6	82	30	9	1.1977	0	1	0.3	0	1	0.0781609	4.19126	0.0010396	successful ranked
1174	Gabapentin	LC-ESI-QTOF	positive	171.126	C9H17NO2	1	1	1	9	7	-1	0.999998	-1	-1	-1	-1	-1	-1	8.85406	-1	Single candidate matches with the answer.
1175	Gabapentin	LC-ESI-QTOF	positive	171.126	C9H17NO2	1	1	1	11	11	-1	0.999998	-1	-1	-1	-1	-1	-1	6.31041	-1	Single candidate matches with the answer.
1176	Gabapentin	LC-ESI-QTOF	positive	171.126	C9H17NO2	1	1	1	4	5	-1	0.999998	-1	-1	-1	-1	-1	-1	8.19791	-1	Single candidate matches with the answer.
1177	Gabapentin	LC-ESI-QTOF	positive	171.126	C9H17NO2	1	1	1	13	13	-1	0.999998	-1	-1	-1	-1	-1	-1	7.97344	-1	Single candidate matches with the answer.
1178	Gabapentin	LC-ESI-QTOF	positive	171.126	C9H17NO2	1	1	1	30	30	-1	0.999998	-1	-1	-1	-1	-1	-1	4.83443	-1	Single candidate matches with the answer.
1179	Gabapentin	LC-ESI-QTOF	positive	171.126	C9H17NO2	1	1	1	28	29	-1	0.999998	-1	-1	-1	-1	-1	-1	10.0529	-1	Single candidate matches with the answer.
1180	Venlafaxine	LC-ESI-QTOF	positive	277.204	C17H27NO2	1	1	1	4	2	-1	0.999998	-1	-1	-1	-1	-1	-1	0	-1	Single candidate matches with the answer.
1181	Venlafaxine	LC-ESI-QTOF	positive	277.204	C17H27NO2	1	1	1	24	22	-1	0.999998	-1	-1	-1	-1	-1	-1	10.4316	-1	Single candidate matches with the answer.
1182	Venlafaxine	LC-ESI-QTOF	positive	277.204	C17H27NO2	1	1	1	38	30	-1	0.999998	-1	-1	-1	-1	-1	-1	8.20438	-1	Single candidate matches with the answer.
1183	Venlafaxine	LC-ESI-QTOF	positive	277.204	C17H27NO2	1	1	1	40	30	-1	0.999998	-1	-1	-1	-1	-1	-1	10.5122	-1	Single candidate matches with the answer.
1184	Venlafaxine	LC-ESI-QTOF	positive	277.204	C17H27NO2	1	1	1	45	30	-1	0.999998	-1	-1	-1	-1	-1	-1	13.7183	-1	Single candidate matches with the answer.
1185	Venlafaxine	LC-ESI-QTOF	positive	277.204	C17H27NO2	1	1	1	6	6	-1	0.999998	-1	-1	-1	-1	-1	-1	22.0229	-1	Single candidate matches with the answer.
1186	Venlafaxine	LC-ESI-QTOF	positive	277.204	C17H27NO2	1	1	1	7	8	-1	0.999998	-1	-1	-1	-1	-1	-1	19.0842	-1	Single candidate matches with the answer.
1187	Venlafaxine	LC-ESI-QTOF	positive	277.204	C17H27NO2	1	1	1	10	11	-1	0.999998	-1	-1	-1	-1	-1	-1	30.8516	-1	Single candidate matches with the answer.
1188	Rosiglitazone	LC-ESI-qTof	positive	357.115	C18H19N3O3S	1	1	6	125	33	13	1.18841	0	1	0.541667	1	1	0.0978261	4.26282	0.0011679	successful ranked
1189	Valdecoxib	LC-ESI-qTof	positive	314.073	C16H14N2O3S	2	2	8	1000	31	16	1.16322	1	1	0.533333	0	1	0.0321839	0.77175	0.0014601	successful ranked
1190	Topiramate	LC-ESI-qTof	positive	339.099	C12H21NO8S	1	1	9	163	33	10	1.16316	0	1	0.5	1	0	0.0736842	2.58086	0.0016458	successful ranked
1191	Topiramate	LC-ESI-qTof	positive	339.099	C12H21NO8S	1	1	9	79	30	17	1.24275	0	1	0.708333	1	1	0.134058	4.74407	0.0016274	successful ranked
1192	Sumatriptan	LC-ESI-qTof	positive	295.135	C14H21N3O2S	1	1	3	181	29	12	1.08867	1	1	0.413793	1	1	0.0270936	2.71192	0.0005639	successful ranked
1193	Sumatriptan	LC-ESI-qTof	positive	295.135	C14H21N3O2S	1	1	3	525	31	8	1.15686	1	1	0.444444	1	1	0.0457516	1.23086	0.0005947	successful ranked
1194	Sildenafil	LC-ESI-qTof	positive	474.205	C22H30N6O4S	8	8	10	1000	31	9	1.26601	1	1	0.310345	0	1	0.137931	0.696607	0.0018363	successful ranked
1195	Sildenafil	LC-ESI-qTof	positive	474.205	C22H30N6O4S	8	8	10	1000	30	14	1.27816	1	1	0.466667	0	1	0.0367816	1.37298	0.0018	successful ranked
1196	(R)-Salsolinol	LC-ESI-QTOF	positive	179.095	C10H13NO2	1	1	2	27	11	3	1.07273	0	1	0.272727	1	1	0.0363636	3.49633	0.0002088	successful ranked
1197	(R)-Salsolinol	LC-ESI-QTOF	positive	179.095	C10H13NO2	1	1	2	34	19	2	1.02206	0	1	0.117647	1	0	0.00735294	2.96272	0.000286	successful ranked
1198	(R)-Salsolinol	LC-ESI-QTOF	positive	179.095	C10H13NO2	1	1	2	41	25	6	1.05138	0	1	0.26087	1	1	0.0237154	2.64606	0.0003238	successful ranked
1199	(R)-Salsolinol	LC-ESI-QTOF	positive	179.095	C10H13NO2	2	2	2	38	25	6	1.06061	0	1	0.272727	0	1	0.00865801	3.32918	0.0003341	successful ranked
1200	Hesperetin	LC-ESI-qTof	positive	302.079	C16H14O6	3	3	8	329	31	6	1.07077	0	1	0.230769	0	1	0.00615385	1.44102	0.001327	successful ranked
1201	Hesperetin	LC-ESI-QTOF	negative	302.079	C16H14O6	2	2	9	3	1	0	0.944005	-1	0	-1	-1	-1	-1	0	0	No mother-daughter relation is found for all the precursor formula.
1202	Hesperetin	LC-ESI-QTOF	negative	302.079	C16H14O6	1	1	8	17	15	13	1.69524	0	1	0.866667	1	1	0.466667	9.83876	0.0009157	successful ranked
1203	Hesperetin	LC-ESI-QTOF	negative	302.079	C16H14O6	1	1	8	58	30	23	1.50115	0	1	0.766667	1	1	0.363218	4.12408	0.0014137	successful ranked
1204	Hesperetin	LC-ESI-QTOF	negative	302.079	C16H14O6	1	1	8	51	30	25	1.57701	0	1	0.833333	1	1	0.372414	4.56602	0.0013851	successful ranked
1205	Hesperetin	LC-ESI-QTOF	negative	302.079	C16H14O6	1	1	8	40	30	25	1.51494	0	1	0.833333	1	1	0.289655	6.56682	0.0014421	successful ranked
1206	Hesperetin	LC-ESI-QTOF	negative	302.079	C16H14O6	2	8	8	14	13	0	1.03571	0	0	0	0	1	0.0357143	19.271	0.0005959	successful ranked
1207	Hesperetin	LC-ESI-QTOF	positive	302.079	C16H14O6	1	3	8	5	3	2	1.66667	0	0	0.666667	1	0	0	72.1216	0.0004038	successful ranked
1208	Hesperetin	LC-ESI-QTOF	positive	302.079	C16H14O6	1	1	8	15	13	10	1.5	0	1	0.769231	1	0	0.128205	12.4543	0.0008715	successful ranked
1209	Hesperetin	LC-ESI-QTOF	positive	302.079	C16H14O6	1	1	8	15	15	12	1.47619	0	1	0.8	1	1	0.314286	21.6073	0.0008719	successful ranked
1210	Hesperetin	LC-ESI-QTOF	positive	302.079	C16H14O6	1	1	8	14	15	11	1.4381	0	1	0.733333	1	1	0.285714	32.1639	0.0008357	successful ranked
1211	Hesperetin	LC-ESI-QTOF	positive	302.079	C16H14O6	1	1	8	21	22	18	1.54545	0	1	0.818182	1	1	0.294372	22.8735	0.0011189	successful ranked
1212	Gingerol	LC-ESI-QTOF	positive	294.183	C17H26O4	1	1	3	12	12	9	1.5303	0	1	0.75	1	1	0.484848	18.3167	0.0003116	successful ranked
1213	Gingerol	LC-ESI-QTOF	positive	294.183	C17H26O4	1	1	3	13	14	10	1.37363	0	1	0.714286	1	1	0.274725	21.9565	0.0003474	successful ranked
1214	Gingerol	LC-ESI-QTOF	positive	294.183	C17H26O4	1	1	3	10	11	8	1.50909	0	1	0.727273	1	1	0.490909	34.0589	0.0002743	successful ranked
1215	Gingerol	LC-ESI-QTOF	positive	294.183	C17H26O4	1	1	3	15	16	7	1.24176	0	1	0.5	1	1	0.175824	32.8623	0.0004385	successful ranked
1216	Gingerol	LC-ESI-QTOF	positive	294.183	C17H26O4	1	1	3	19	20	14	1.43275	0	1	0.736842	1	1	0.397661	33.6698	0.0004317	successful ranked
1217	Indole-3-carbinol	LC-ESI-QTOF	positive	147.068	C9H9NO	1	1	3	4	4	0	0.999999	-1	0	-1	-1	-1	-1	11.0827	0.0002169	No mother-daughter relation is found for all the precursor formula.
1218	Indole-3-carbinol	LC-ESI-QTOF	positive	147.068	C9H9NO	1	1	3	11	11	2	1.08333	0	1	0.222222	1	0	0.0277778	10.1991	0.000305	successful ranked
1219	Indole-3-carbinol	LC-ESI-QTOF	positive	147.068	C9H9NO	1	2	3	18	13	5	1.21212	0	0	0.416667	1	0	0	5.68009	0.0003416	successful ranked
1220	Sulforaphane	LC-ESI-QTOF (UPLC Q-Tof Premier; Waters)	positive	177.028	C6H11NOS2	1	1	3	3	4	3	1.66667	0	1	0.75	1	1	0.666667	27.5999	0.0001815	successful ranked
1221	Sulforaphane	LC-ESI-QTOF	positive	177.028	C6H11NOS2	1	1	3	3	4	3	1.66667	0	1	0.75	1	1	0.666667	27.5999	0.0001622	successful ranked
1222	Quercetin	LC-ESI-QTOF (UPLC Q-Tof Premier; Waters)	positive	302.043	C15H10O7	3	10	10	10	2	0	2	0	0	0	0	0	0	28.3177	0.0003708	successful ranked
1223	Quercetin	LC-ESI-QTOF (UPLC Q-Tof Premier; Waters)	negative	302.043	C15H10O7	1	1	10	18	18	13	1.52941	0	1	0.764706	1	1	0.272059	13.4051	0.0014524	successful ranked
1224	Quercetin	LC-ESI-QTOF (UPLC Q-Tof Premier; Waters)	negative	302.043	C15H10O7	3	6	10	8	6	1	1.26667	0	0	0.166667	0	1	0.133333	32.3476	0.0006002	successful ranked
1225	Quercetin	LC-ESI-QTOF (UPLC Q-Tof Premier; Waters)	negative	302.043	C15H10O7	9	9	10	74	32	6	1.1	0	1	0.24	0	0	0.0133333	4.77577	0.0017425	successful ranked
1226	Quercetin	LC-ESI-QTOF (UPLC Q-Tof Premier; Waters)	negative	302.043	C15H10O7	6	10	10	8	4	0	1.66667	0	0	0	0	0	0	57.0841	0.0005993	successful ranked
1227	Quercetin	LC-ESI-QTOF (UPLC Q-Tof Premier; Waters)	positive	302.043	C15H10O7	1	1	10	47	31	19	1.33251	0	1	0.655172	0	0	0.0566502	4.64367	0.0018845	successful ranked
1228	Quercetin	LC-ESI-QTOF (UPLC Q-Tof Premier; Waters)	positive	302.043	C15H10O7	4	4	10	13	13	6	1.37879	0	1	0.5	0	1	0.0757576	12.2507	0.0010662	successful ranked
1229	Quercetin	LC-ESI-QTOF (UPLC Q-Tof Premier; Waters)	positive	302.043	C15H10O7	1	1	10	4	4	3	2	0	1	0.75	1	0	0.333333	34.0902	0.0004926	successful ranked
1230	Quercetin	LC-ESI-QTOF (UPLC Q-Tof Premier; Waters)	negative	302.043	C15H10O7	1	1	10	11	10	5	1.46429	0	1	0.625	1	1	0.142857	28.9428	0.0009606	successful ranked
1231	Quercetin	LC-ESI-QTOF	negative	302.043	C15H10O7	2	2	11	3	1	0	0.928349	-1	0	-1	-1	-1	-1	0	0	No mother-daughter relation is found for all the precursor formula.
1232	Quercetin	LC-ESI-QTOF	negative	302.043	C15H10O7	1	1	10	12	10	7	1.48889	0	1	0.7	1	1	0.244444	23.3657	0.0009241	successful ranked
1233	Quercetin	LC-ESI-QTOF	negative	302.043	C15H10O7	1	1	10	23	22	18	1.54978	0	1	0.818182	1	1	0.34632	7.44204	0.0014415	successful ranked
1234	Quercetin	LC-ESI-QTOF	negative	302.043	C15H10O7	1	1	10	26	26	23	1.60615	0	1	0.884615	1	1	0.458462	9.17769	0.0016563	successful ranked
1235	Quercetin	LC-ESI-QTOF	negative	302.043	C15H10O7	1	1	10	19	20	17	1.5	0	1	0.85	1	1	0.221053	19.9986	0.0014446	successful ranked
1236	Quercetin	LC-ESI-QTOF	negative	302.043	C15H10O7	2	3	10	3	3	1	1.66667	0	0	0.333333	0	1	0.333333	63.9225	0.0004979	successful ranked
1237	Quercetin	LC-ESI-QTOF	negative	302.043	C15H10O7	3	3	10	14	14	4	1.12088	0	1	0.285714	0	1	0.043956	10.0696	0.0010651	successful ranked
1238	Quercetin	LC-ESI-QTOF	negative	302.043	C15H10O7	3	3	10	48	30	10	1.12644	0	1	0.333333	0	1	0.0229885	5.76918	0.0017295	successful ranked
1239	Quercetin	LC-ESI-QTOF	negative	302.043	C15H10O7	3	3	10	50	30	13	1.22989	0	1	0.433333	0	1	0.0252874	8.77793	0.0018174	successful ranked
1240	Quercetin	LC-ESI-QTOF	negative	302.043	C15H10O7	1	1	10	18	18	13	1.52941	0	1	0.764706	1	1	0.272059	13.4051	0.001347	successful ranked
1241	Quercetin	LC-ESI-QTOF	negative	302.043	C15H10O7	3	6	10	8	6	1	1.26667	0	0	0.166667	0	1	0.133333	32.3476	0.0006001	successful ranked
1242	Quercetin	LC-ESI-QTOF	negative	302.043	C15H10O7	9	9	10	74	30	5	1.10672	0	1	0.217391	0	1	0.00790514	4.77577	0.0016745	successful ranked
1243	Quercetin	LC-ESI-QTOF	negative	302.043	C15H10O7	6	10	10	8	4	0	1.66667	0	0	0	0	0	0	57.0841	0.0006375	successful ranked
1244	Quercetin	LC-ESI-QTOF	negative	302.043	C15H10O7	1	1	10	11	10	5	1.46429	0	1	0.625	1	1	0.142857	28.9428	0.0010702	successful ranked
1245	Quercetin	LC-ESI-QTOF	negative	302.043	C15H10O7	1	1	10	28	27	10	1.16304	0	1	0.416667	0	1	0.0615942	8.07518	0.0016577	successful ranked
1246	Quercetin	LC-ESI-QTOF	negative	302.043	C15H10O7	4	5	10	13	12	2	1.10909	0	0	0.181818	0	0	0.0363636	17.397	0.001148	successful ranked
1247	Quercetin	LC-ESI-QTOF	positive	302.043	C15H10O7	1	1	11	3	1	0	0.901019	-1	0	-1	-1	-1	-1	0	0	No mother-daughter relation is found for all the precursor formula.
1248	Quercetin	LC-ESI-QTOF	positive	302.043	C15H10O7	7	7	11	3	1	0	0.933964	-1	0	-1	-1	-1	-1	0	0	No mother-daughter relation is found for all the precursor formula.
1249	Quercetin	LC-ESI-QTOF	positive	302.043	C15H10O7	1	1	10	14	12	11	1.83333	0	1	0.916667	1	1	0.393939	6.67586	0.0010831	successful ranked
1250	Quercetin	LC-ESI-QTOF	positive	302.043	C15H10O7	1	1	10	62	30	25	1.53563	0	1	0.833333	1	1	0.333333	3.59036	0.0017038	successful ranked
1251	Quercetin	LC-ESI-QTOF	positive	302.043	C15H10O7	1	1	10	63	31	27	1.54194	0	1	0.870968	1	1	0.339785	3.61289	0.001799	successful ranked
1252	Quercetin	LC-ESI-QTOF	positive	302.043	C15H10O7	1	2	10	8	7	2	1.14286	0	0	0.285714	1	0	0	18.962	0.0006346	successful ranked
1253	Quercetin	LC-ESI-QTOF	positive	302.043	C15H10O7	1	1	10	72	30	11	1.11264	0	1	0.366667	0	0	0.0183908	3.73937	0.0019122	successful ranked
1254	Quercetin	LC-ESI-QTOF	positive	302.043	C15H10O7	4	4	10	87	30	10	1.13793	0	1	0.344828	0	0	0.0246305	3.942	0.0029604	successful ranked
1255	Quercetin	LC-ESI-QTOF	positive	302.043	C15H10O7	5	10	10	11	5	0	1.1	0	0	0	0	0	0	10.6808	0.0008322	successful ranked
1256	Quercetin	LC-ESI-QTOF	positive	302.043	C15H10O7	1	1	10	22	14	3	1.04396	0	1	0.214286	1	0	0.010989	10.7256	0.0010402	successful ranked
1257	Quercetin	LC-ESI-QTOF	positive	302.043	C15H10O7	7	7	10	43	37	6	1.05706	0	1	0.162162	0	1	0.012012	4.71557	0.0019433	successful ranked
1258	Quercetin	LC-ESI-QTOF	positive	302.043	C15H10O7	1	1	10	47	30	18	1.32275	0	1	0.642857	0	0	0.0661376	4.64367	0.0029998	successful ranked
1259	Quercetin	LC-ESI-QTOF	positive	302.043	C15H10O7	4	4	10	13	13	6	1.37879	0	1	0.5	0	1	0.0757576	12.2507	0.0017884	successful ranked
1260	Quercetin	LC-ESI-QTOF	positive	302.043	C15H10O7	1	1	10	4	4	3	2	0	1	0.75	1	0	0.333333	34.0902	0.0007847	successful ranked
1261	Luteolin	LC-ESI-QTOF (UPLC Q-Tof Premier; Waters)	positive	286.048	C15H10O6	1	1	10	9	2	0	0.999999	-1	0	-1	-1	-1	-1	15.5865	0.0003453	No mother-daughter relation is found for all the precursor formula.
1262	Luteolin	LC-ESI-QTOF (UPLC Q-Tof Premier; Waters)	negative	286.048	C15H10O6	1	1	10	22	17	14	1.66176	0	1	0.823529	1	1	0.316176	11.9178	0.0012824	successful ranked
1263	Luteolin	LC-ESI-QTOF (UPLC Q-Tof Premier; Waters)	positive	286.048	C15H10O6	1	1	10	30	28	12	1.25238	0	1	0.571429	1	0	0.109524	8.03392	0.0016774	successful ranked
1264	Luteolin	LC-ESI-QTOF (UPLC Q-Tof Premier; Waters)	positive	286.048	C15H10O6	3	3	10	14	12	5	1.17778	0	0	0.5	1	0	0.0222222	24.288	0.0010585	successful ranked
1265	Luteolin	LC-ESI-QTOF (UPLC Q-Tof Premier; Waters)	positive	286.048	C15H10O6	1	1	10	10	10	8	1.77778	0	1	0.888889	1	1	0.388889	24.9462	0.0009167	successful ranked
1266	Luteolin	LC-ESI-QTOF (UPLC Q-Tof Premier; Waters)	negative	286.048	C15H10O6	1	1	10	6	6	5	1.8	0	1	0.833333	1	1	0.4	40.8535	0.0006776	successful ranked
1267	Luteolin	LC-ESI-QTOF (UPLC Q-Tof Premier; Waters)	negative	286.048	C15H10O6	1	1	10	22	22	14	1.37662	0	1	0.636364	0	1	0.121212	15.0865	0.0014196	successful ranked
1268	Luteolin	LC-ESI-QTOF	negative	286.048	C15H10O6	1	1	10	22	17	14	1.66176	0	1	0.823529	1	1	0.316176	11.9178	0.0012542	successful ranked
1269	Luteolin	LC-ESI-QTOF	negative	286.048	C15H10O6	1	1	10	6	6	5	1.8	0	1	0.833333	1	1	0.4	40.8535	0.0006875	successful ranked
1270	Luteolin	LC-ESI-QTOF	negative	286.048	C15H10O6	1	1	10	22	22	14	1.37662	0	1	0.636364	0	1	0.121212	15.0865	0.0014489	successful ranked
1271	Luteolin	LC-ESI-QTOF	negative	286.048	C15H10O6	2	4	10	7	5	1	1.6	0	0	0.2	0	1	0.5	38.2626	0.0005971	successful ranked
1272	Luteolin	LC-ESI-QTOF	negative	286.048	C15H10O6	1	1	10	17	17	10	1.31618	0	1	0.588235	1	1	0.125	10.6886	0.0011201	successful ranked
1273	Luteolin	LC-ESI-QTOF	negative	286.048	C15H10O6	1	1	10	45	30	12	1.16667	0	1	0.428571	0	1	0.0555556	5.44482	0.0016942	successful ranked
1274	Luteolin	LC-ESI-QTOF	positive	286.048	C15H10O6	2	10	10	3	2	0	2	0	0	0	0	1	1	0	0.0003953	successful ranked
1275	Luteolin	LC-ESI-QTOF	positive	286.048	C15H10O6	2	2	10	25	24	10	1.14493	0	1	0.416667	0	1	0.0289855	6.98479	0.0025204	successful ranked
1276	Luteolin	LC-ESI-QTOF	positive	286.048	C15H10O6	1	1	10	52	30	15	1.14778	0	1	0.517241	0	1	0.0147783	6.62877	0.0018349	successful ranked
1277	Luteolin	LC-ESI-QTOF	positive	286.048	C15H10O6	1	1	10	30	28	12	1.25238	0	1	0.571429	1	0	0.109524	8.03392	0.0016495	successful ranked
1278	Luteolin	LC-ESI-QTOF	positive	286.048	C15H10O6	3	3	10	14	12	5	1.17778	0	0	0.5	1	0	0.0222222	24.288	0.0010193	successful ranked
1279	Luteolin	LC-ESI-QTOF	positive	286.048	C15H10O6	1	1	10	10	10	8	1.77778	0	1	0.888889	1	1	0.388889	24.9462	0.0009079	successful ranked
1280	Luteolin	LC-ESI-QTOF	positive	286.048	C15H10O6	3	4	10	5	5	1	1.2	0	0	0.2	0	0	0	32.7338	0.000589	successful ranked
1281	Luteolin	LC-ESI-QTOF	positive	286.048	C15H10O6	2	6	10	6	6	2	1.26667	0	0	0.333333	0	1	0.133333	31.6717	0.0007168	successful ranked
1282	Kaempferol	LC-ESI-QTOF (UPLC Q-Tof Premier; Waters)	positive	286.048	C15H10O6	1	1	10	7	1	0	0.999999	-1	0	-1	-1	-1	-1	0	0	No mother-daughter relation is found for all the precursor formula.
1283	Kaempferol	LC-ESI-QTOF (UPLC Q-Tof Premier; Waters)	negative	286.048	C15H10O6	1	1	10	29	26	25	1.72923	0	1	0.961538	1	1	0.409231	8.24715	0.0016446	successful ranked
1284	Kaempferol	LC-ESI-QTOF (UPLC Q-Tof Premier; Waters)	negative	286.048	C15H10O6	10	10	10	180	30	2	1.07143	0	1	0.0714286	0	0	0.00793651	1.41756	0.0016509	successful ranked
1285	Kaempferol	LC-ESI-QTOF (UPLC Q-Tof Premier; Waters)	positive	286.048	C15H10O6	2	2	10	33	31	14	1.29345	0	1	0.518519	0	1	0.0569801	7.31015	0.0017699	successful ranked
1286	Kaempferol	LC-ESI-QTOF (UPLC Q-Tof Premier; Waters)	positive	286.048	C15H10O6	1	1	10	22	20	8	1.2	0	1	0.5	0	0	0.0333333	7.88411	0.0012503	successful ranked
1287	Kaempferol	LC-ESI-QTOF (UPLC Q-Tof Premier; Waters)	positive	286.048	C15H10O6	8	9	10	10	10	2	1.38095	0	0	0.285714	0	0	0	37.0627	0.0009781	successful ranked
1288	Kaempferol	LC-ESI-QTOF (UPLC Q-Tof Premier; Waters)	negative	286.048	C15H10O6	3	6	10	6	6	2	1.4	0	0	0.4	0	1	0.1	44.1337	0.0007451	successful ranked
1289	Kaempferol	LC-ESI-qTof	positive	286.048	C15H10O6	1	1	10	383	30	14	1.16552	0	1	0.466667	0	1	0.045977	0.707877	0.0016551	successful ranked
1290	Kaempferol	LC-ESI-QTOF	negative	286.048	C15H10O6	1	1	10	29	26	25	1.72923	0	1	0.961538	1	1	0.409231	8.24715	0.0017088	successful ranked
1291	Kaempferol	LC-ESI-QTOF	negative	286.048	C15H10O6	10	10	10	180	30	2	1.07143	0	1	0.0714286	0	0	0.00793651	1.41756	0.0017301	successful ranked
1292	Kaempferol	LC-ESI-QTOF	negative	286.048	C15H10O6	3	6	10	6	6	2	1.4	0	0	0.4	0	1	0.1	44.1337	0.0008346	successful ranked
1293	Kaempferol	LC-ESI-QTOF	negative	286.048	C15H10O6	2	6	10	4	3	1	1.66667	0	0	0.333333	0	1	0.333333	61.2514	0.0004934	successful ranked
1294	Kaempferol	LC-ESI-QTOF	negative	286.048	C15H10O6	5	6	10	31	29	6	1.03989	0	0	0.222222	0	1	0.011396	6.23874	0.0015683	successful ranked
1295	Kaempferol	LC-ESI-QTOF	negative	286.048	C15H10O6	1	1	10	92	30	19	1.30115	0	1	0.633333	0	1	0.105747	2.93389	0.001751	successful ranked
1296	Kaempferol	LC-ESI-QTOF	positive	286.048	C15H10O6	1	3	10	3	2	1	2	0	0	0.5	1	0	0	94.7785	0.0003934	successful ranked
1297	Kaempferol	LC-ESI-QTOF	positive	286.048	C15H10O6	2	2	10	66	30	11	1.13103	0	1	0.366667	0	1	0.0344828	3.84071	0.0016743	successful ranked
1298	Kaempferol	LC-ESI-QTOF	positive	286.048	C15H10O6	1	1	10	84	30	13	1.14462	0	1	0.5	1	0	0.0492308	3.37152	0.0016761	successful ranked
1299	Kaempferol	LC-ESI-QTOF	positive	286.048	C15H10O6	5	10	10	10	4	0	1.16667	0	0	0	0	0	0	11.4541	0.0005014	successful ranked
1300	Kaempferol	LC-ESI-QTOF	positive	286.048	C15H10O6	1	2	10	12	9	2	1.08333	0	0	0.222222	1	0	0	18.1791	0.0008078	successful ranked
1301	Kaempferol	LC-ESI-QTOF	positive	286.048	C15H10O6	8	8	10	36	29	3	1.07389	0	1	0.103448	0	1	0.0221675	4.96034	0.0015874	successful ranked
1302	Kaempferol	LC-ESI-QTOF	positive	286.048	C15H10O6	9	9	10	77	32	2	1.04234	0	1	0.0625	0	1	0	2.59389	0.0016399	successful ranked
1303	Kaempferol	LC-ESI-QTOF	positive	286.048	C15H10O6	9	9	10	219	30	3	1.05172	0	1	0.103448	0	1	0.0123153	1.28553	0.001625	successful ranked
1304	Kaempferol	LC-ESI-QTOF	positive	286.048	C15H10O6	2	2	10	33	30	14	1.30154	0	1	0.538462	0	1	0.0461538	7.31015	0.0017097	successful ranked
1305	Kaempferol	LC-ESI-QTOF	positive	286.048	C15H10O6	1	1	10	22	20	8	1.2	0	1	0.5	0	0	0.0333333	7.88411	0.0014721	successful ranked
1306	Kaempferol	LC-ESI-QTOF	positive	286.048	C15H10O6	8	9	10	10	10	2	1.38095	0	0	0.285714	0	0	0	37.0627	0.0009538	successful ranked
1307	Formononetin	LC-ESI-qTof	positive	268.074	C16H12O4	1	1	6	1000	30	21	1.37931	0	1	0.7	1	1	0.128736	0.325975	0.0011577	successful ranked
1308	Formononetin	LC-ESI-QTOF	negative	268.074	C16H12O4	1	1	6	8	8	7	1.92857	0	1	0.875	1	1	0.464286	21.4297	0.0005562	successful ranked
1309	Formononetin	LC-ESI-QTOF	negative	268.074	C16H12O4	2	3	6	6	6	2	1.26667	0	0	0.333333	0	1	0.0666667	21.9499	0.0004444	successful ranked
1310	Formononetin	LC-ESI-QTOF	negative	268.074	C16H12O4	1	1	6	15	15	6	1.24359	0	1	0.461538	0	0	0.0384615	16.2906	0.0006923	successful ranked
1311	Formononetin	LC-ESI-QTOF	negative	268.074	C16H12O4	4	4	6	62	30	8	1.10053	0	1	0.285714	0	1	0.021164	4.94889	0.001054	successful ranked
1312	Formononetin	LC-ESI-QTOF	positive	268.074	C16H12O4	3	6	6	9	9	0	1.08333	0	0	0	0	1	0.0555556	25.0626	0.0004012	successful ranked
1313	Formononetin	LC-ESI-QTOF	positive	268.074	C16H12O4	6	6	6	6	6	0	1.4	0	1	0	0	1	0.2	41.932	0.0004545	successful ranked
1314	Formononetin	LC-ESI-QTOF	positive	268.074	C16H12O4	5	6	6	15	14	1	1.13636	0	0	0.0833333	0	0	0.030303	13.068	0.0007647	successful ranked
1315	Eugenol	LC-ESI-QTOF	positive	164.084	C10H12O2	1	2	3	16	14	9	1.38462	0	0	0.642857	1	0	0	5.51101	0.000379	successful ranked
1316	Eugenol	LC-ESI-QTOF	positive	164.084	C10H12O2	1	1	3	17	17	11	1.34559	0	1	0.647059	1	1	0.0441176	4.43527	0.0003898	successful ranked
1317	Eugenol	LC-ESI-QTOF	positive	164.084	C10H12O2	1	1	3	15	16	13	1.45	0	1	0.8125	1	1	0.166667	7.09651	0.0004495	successful ranked
1318	Eugenol	LC-ESI-QTOF	positive	164.084	C10H12O2	1	1	3	9	10	7	1.42222	0	1	0.7	1	1	0.266667	12.7996	0.0003086	successful ranked
1319	Eugenol	LC-ESI-QTOF	positive	164.084	C10H12O2	1	1	3	3	4	2	1.5	0	1	0.5	1	0	0.166667	26.2695	0.000274	successful ranked
1320	Eriodictyol	LC-ESI-QTOF	negative	288.063	C15H12O6	1	1	9	11	10	6	1.35556	0	1	0.6	1	0	0.0666667	40.6065	0.0008125	successful ranked
1321	Eriodictyol	LC-ESI-QTOF	negative	288.063	C15H12O6	1	1	9	11	8	5	1.42857	0	1	0.625	0	1	0.0357143	45.135	0.0007364	successful ranked
1322	Eriodictyol	LC-ESI-QTOF	negative	288.063	C15H12O6	3	6	9	14	15	2	1.2381	0	0	0.285714	0	1	0.047619	35.4417	0.001045	successful ranked
1323	Eriodictyol	LC-ESI-QTOF	negative	288.063	C15H12O6	6	9	9	11	9	0	1.6	0	0	0	0	1	0.1	45.6948	0.000718	successful ranked
1324	Eriodictyol	LC-ESI-QTOF	negative	288.063	C15H12O6	1	1	9	6	6	4	1.8	0	1	0.8	1	1	0.2	51.0749	0.0006887	successful ranked
1325	Eriodictyol	LC-ESI-QTOF	positive	288.063	C15H12O6	7	9	9	17	18	0	1.13636	0	0	0	0	1	0.0151515	29.6269	0.0011258	successful ranked
1326	Eriodictyol	LC-ESI-QTOF	positive	288.063	C15H12O6	2	2	9	20	18	6	1.21978	0	1	0.428571	0	1	0.032967	19.606	0.00113	successful ranked
1327	Eriodictyol	LC-ESI-QTOF	positive	288.063	C15H12O6	8	9	9	10	10	0	1.47619	0	0	0	0	1	0.190476	32.8093	0.0008197	successful ranked
1328	Alpha-Tocotrienol	LC-ESI-QTOF	positive	424.334	C29H44O2	3	3	3	10	10	1	1.33333	0	1	0.166667	0	1	0.2	81.6171	0.0002982	successful ranked
1329	Ecgonine methyl ester	LC-ESI-QTOF	positive	199.121	C10H17NO3	1	2	2	5	3	1	1.33333	0	0	0.333333	1	0	0	9.54292	0.0001281	successful ranked
1330	Ecgonine methyl ester	LC-ESI-QTOF	positive	199.121	C10H17NO3	1	1	2	11	9	4	1.22222	0	1	0.444444	1	1	0.0833333	11.8345	0.0002063	successful ranked
1331	Ecgonine methyl ester	LC-ESI-QTOF	positive	199.121	C10H17NO3	1	1	2	25	25	15	1.23551	0	1	0.625	1	1	0.184783	4.63481	0.000382	successful ranked
1332	Ecgonine methyl ester	LC-ESI-QTOF	positive	199.121	C10H17NO3	1	1	2	21	21	15	1.33333	0	1	0.714286	1	1	0.138095	5.20286	0.0003639	successful ranked
1333	Ecgonine methyl ester	LC-ESI-QTOF	positive	199.121	C10H17NO3	1	1	2	9	10	7	1.61111	0	1	0.777778	1	1	0.472222	9.57961	0.0002112	successful ranked
1334	3-Indoleacetonitrile	LC-ESI-QTOF	positive	156.069	C10H8N2	1	1	3	13	6	1	1.1	0	1	0.2	1	1	0.1	4.76446	0.0002842	successful ranked
1335	3-Indoleacetonitrile	LC-ESI-QTOF	positive	156.069	C10H8N2	1	1	3	14	8	0	0.999999	-1	0	-1	-1	-1	-1	4.50642	0.0002539	No mother-daughter relation is found for all the precursor formula.
1336	3-Indoleacetonitrile	LC-ESI-QTOF	positive	156.069	C10H8N2	1	1	3	13	10	0	0.999999	-1	0	-1	-1	-1	-1	4.461	0.0002345	No mother-daughter relation is found for all the precursor formula.
1337	3-Indoleacetonitrile	LC-ESI-QTOF	positive	156.069	C10H8N2	2	3	3	10	9	0	1.04762	0	0	0	0	1	0.047619	8.57455	0.0002837	successful ranked
1338	3-Indoleacetonitrile	LC-ESI-QTOF	positive	156.069	C10H8N2	1	1	3	13	13	2	1.08333	0	1	0.222222	1	0	0.0277778	7.63354	0.0003891	successful ranked
1339	dIMP	LC-ESI-QTOF (UPLC Q-Tof Premier; Waters)	positive	332.052	C10H13N4O7P	2	3	11	5	4	2	1.83333	1	0	0.5	0	1	0.333333	48.5366	0.0006494	successful ranked
1340	dIMP	LC-ESI-QTOF (UPLC Q-Tof Premier; Waters)	positive	332.052	C10H13N4O7P	5	6	11	4	4	1	1.66667	0	0	0.25	0	1	0.166667	30.1804	0.0005997	successful ranked
1341	dIMP	LC-ESI-QTOF (UPLC Q-Tof Premier; Waters)	negative	332.052	C10H13N4O7P	2	2	11	7	7	3	1.33333	1	1	0.428571	0	1	0.047619	46.8287	0.0007789	successful ranked
1342	dIMP	LC-ESI-QTOF	negative	332.052	C10H13N4O7P	2	2	11	7	7	3	1.33333	1	1	0.428571	0	1	0.047619	46.8287	0.0007523	successful ranked
1343	dIMP	LC-ESI-QTOF	positive	332.052	C10H13N4O7P	2	3	11	5	4	2	1.83333	1	0	0.5	0	1	0.333333	48.5366	0.0006104	successful ranked
1344	dIMP	LC-ESI-QTOF	positive	332.052	C10H13N4O7P	5	6	11	4	4	1	1.66667	0	0	0.25	0	1	0.166667	30.1804	0.0006321	successful ranked
1345	TG(16:0/16:0/16:0)	LC-ESI-QTOF (ACQUITY UPLC System; Waters)	positive	806.736	C51H98O6	1	1	1	226	23	-1	0.999992	-1	-1	-1	-1	-1	-1	4.62711	-1	Single candidate matches with the answer.
1346	TG(16:0/16:0/16:0)	LC-ESI-QTOF (ACQUITY UPLC System; Waters)	positive	806.736	C51H98O6	1	1	1	36	37	-1	0.999992	-1	-1	-1	-1	-1	-1	42.3078	-1	Single candidate matches with the answer.
1347	Adrenosterone	LC-ESI-qTof	positive	300.173	C19H24O3	1	1	4	927	30	24	1.62562	0	1	0.827586	1	1	0.480296	0.59873	0.0008353	successful ranked
1348	Glycyrrhetinic acid	LC-ESI-qTof	positive	470.34	C30H46O4	2	2	2	1000	17	1	1.20952	0	1	0.0666667	0	1	0.2	1.55458	0.0003025	successful ranked
1349	L-Iditol	LC-ESI-QTOF (UPLC Q-Tof Premier; Waters)	negative	182.079	C6H14O6	1	1	4	6	6	4	2	0	1	0.8	1	1	1	29.9075	0.0002732	successful ranked
1350	L-Iditol	LC-ESI-QTOF	negative	182.079	C6H14O6	1	1	4	6	6	4	2	0	1	0.8	1	1	1	29.9075	0.0002388	successful ranked
1351	Glycyl-glycine	LC-ESI-QTOF	negative	132.053	C4H8N2O3	1	1	1	5	3	-1	0.999999	-1	-1	-1	-1	-1	-1	18.3957	-1	Single candidate matches with the answer.
1352	D-Arabinose 5-phosphate	LC-ESI-QTOF	negative	230.019	C5H11O8P	1	1	5	4	4	3	2	0	1	0.75	1	1	0.666667	39.0132	0.0003644	successful ranked
1353	Ciliatine	LC-ESI-QTOF	negative	125.024	C2H8NO3P	1	1	2	4	4	3	2	0	1	0.75	1	1	1	13.0842	0.0001711	successful ranked
1354	Ciliatine	LC-ESI-QTOF	positive	125.024	C2H8NO3P	1	1	2	3	2	0	0.999999	-1	0	-1	-1	-1	-1	28.9742	0	No mother-daughter relation is found for all the precursor formula.
1355	Methyldopa	LC-ESI-qTof	positive	211.084	C10H13NO4	1	1	2	110	32	9	1.22222	0	1	0.5	0	1	0.0522876	3.71832	0.0004623	successful ranked
1356	Cis-zeatin	LC-ESI-qTof	positive	219.112	C10H13N5O	1	1	2	855	30	6	1.02989	0	1	0.2	1	1	0.0275862	0.33786	0.0004167	successful ranked
1357	Cis-zeatin	LC-ESI-QTOF	negative	219.112	C10H13N5O	1	1	2	9	9	3	1.16667	1	1	0.333333	1	1	0.166667	16.4909	0.0002186	successful ranked
1358	Cis-zeatin	LC-ESI-QTOF	negative	219.112	C10H13N5O	1	1	2	20	17	4	1.12821	0	1	0.307692	1	1	0.128205	10.1196	0.0003623	successful ranked
1359	Cis-zeatin	LC-ESI-QTOF	negative	219.112	C10H13N5O	1	1	2	37	31	5	1.05138	1	1	0.217391	1	1	0.0513834	4.83146	0.0003934	successful ranked
1360	Cis-zeatin	LC-ESI-QTOF	negative	219.112	C10H13N5O	1	1	2	22	23	6	1.12418	1	1	0.333333	1	1	0.117647	7.3774	0.0003492	successful ranked
1361	Cis-zeatin	LC-ESI-QTOF	positive	219.112	C10H13N5O	1	1	2	6	6	3	1.26667	1	1	0.5	1	1	0.266667	9.68332	0.0001715	successful ranked
1362	Cis-zeatin	LC-ESI-QTOF	positive	219.112	C10H13N5O	1	1	2	13	13	2	1.02564	0	1	0.153846	1	1	0.025641	7.83139	0.0002433	successful ranked
1363	Cis-zeatin	LC-ESI-QTOF	positive	219.112	C10H13N5O	1	1	2	14	14	4	1.10606	1	1	0.333333	1	1	0.0909091	7.55236	0.0002457	successful ranked
1364	Cis-zeatin	LC-ESI-QTOF	positive	219.112	C10H13N5O	1	1	2	6	7	2	1.14286	0	1	0.285714	1	1	0.142857	32.6765	0.0001503	successful ranked
1365	Entacapone	LC-ESI-qTof	positive	305.101	C14H15N3O5	1	1	4	285	30	14	1.11264	1	1	0.466667	1	1	0.0804598	1.58536	0.0006759	successful ranked
1366	Kinetin	LC-ESI-qTof	positive	215.081	C10H9N5O	2	2	3	104	30	6	1.09117	1	1	0.222222	0	1	0.0512821	2.48875	0.00062	successful ranked
1367	Kinetin	LC-ESI-QTOF	negative	215.081	C10H9N5O	1	1	3	13	13	9	1.51515	1	1	0.75	1	1	0.30303	7.88141	0.0003564	successful ranked
1368	Kinetin	LC-ESI-QTOF	negative	215.081	C10H9N5O	1	1	3	30	30	14	1.21164	1	1	0.5	1	1	0.10582	4.88969	0.000569	successful ranked
1369	Kinetin	LC-ESI-QTOF	negative	215.081	C10H9N5O	1	1	3	27	28	11	1.20553	1	1	0.478261	1	0	0.0632411	7.0372	0.0005505	successful ranked
1370	Kinetin	LC-ESI-QTOF	positive	215.081	C10H9N5O	2	2	3	4	4	2	1.5	0	1	0.5	1	0	0.166667	19.9886	0.000217	successful ranked
1371	Kinetin	LC-ESI-QTOF	positive	215.081	C10H9N5O	1	1	3	6	6	2	1.2	1	1	0.333333	1	1	0.133333	17.0214	0.0002061	successful ranked
1372	Kinetin	LC-ESI-QTOF	positive	215.081	C10H9N5O	1	1	3	5	6	3	1.4	1	1	0.5	1	1	0.266667	22.2055	0.0002419	successful ranked
1373	Kinetin	LC-ESI-QTOF	positive	215.081	C10H9N5O	1	1	3	8	8	4	1.21429	0	1	0.5	1	1	0.107143	31.9755	0.0002803	successful ranked
1374	Kinetin	LC-ESI-QTOF	positive	215.081	C10H9N5O	2	2	3	11	8	1	1.28571	0	1	0.125	0	1	0.25	8.75563	0.0002514	successful ranked
1375	Kinetin	LC-ESI-QTOF	positive	215.081	C10H9N5O	2	2	3	32	17	4	1.14706	1	1	0.235294	0	1	0.0955882	4.48393	0.0003818	successful ranked
1376	Kinetin	LC-ESI-QTOF	positive	215.081	C10H9N5O	2	2	3	33	21	3	1.14762	1	1	0.142857	0	1	0.12381	4.16963	0.0003739	successful ranked
1377	Kinetin	LC-ESI-QTOF	positive	215.081	C10H9N5O	2	2	3	9	9	2	1.14286	0	1	0.25	0	1	0.0357143	9.3672	0.0002623	successful ranked
1378	Kinetin	LC-ESI-QTOF	positive	215.081	C10H9N5O	1	1	3	27	27	12	1.15667	1	1	0.48	1	1	0.09	5.34168	0.0005239	successful ranked
1379	Kinetin	LC-ESI-QTOF	positive	215.081	C10H9N5O	1	1	3	23	24	10	1.09957	0	1	0.454545	1	0	0.004329	9.93568	0.0004592	successful ranked
1380	Phenylethylamine	LC-ESI-QTOF	positive	121.089	C8H11N	2	2	2	3	2	0	2	0	1	0	0	1	1	0	0.0011695	successful ranked
1381	(R*S)-Norlaudanosoline	LC-ESI-QTOF	positive	287.116	C16H17NO4	4	4	4	22	12	1	1.10606	0	0	0.0833333	0	1	0.030303	13.6195	0.0004118	successful ranked
1382	(R*S)-Norlaudanosoline	LC-ESI-QTOF	positive	287.116	C16H17NO4	1	1	4	55	23	5	1.05138	0	1	0.217391	1	0	0.0158103	4.12122	0.0005485	successful ranked
1383	(R*S)-Norlaudanosoline	LC-ESI-QTOF	positive	287.116	C16H17NO4	2	2	4	82	31	7	1.05161	0	1	0.225806	0	1	0.0107527	2.53763	0.0006925	successful ranked
1384	(R*S)-Norlaudanosoline	LC-ESI-QTOF	positive	287.116	C16H17NO4	4	4	4	132	30	3	1.07389	0	1	0.103448	0	0	0.0147783	1.79495	0.0006811	successful ranked
1385	1*2*3*4-Tetrahydro-beta-carboline	LC-ESI-qTof	positive	172.1	C11H12N2	1	1	2	386	31	9	1.24183	0	1	0.5	1	1	0.0392157	0.608461	0.0004182	successful ranked
1386	Gamma-Tocotrienol	LC-ESI-QTOF	positive	410.318	C28H42O2	2	3	3	6	4	0	2	0	0	0	0	1	1	116.417	0.0002615	successful ranked
1387	Beta-Guanidinopropionic acid	LC-ESI-QTOF	positive	131.069	C4H9N3O2	1	1	1	6	6	-1	0.999999	-1	-1	-1	-1	-1	-1	10.5047	-1	Single candidate matches with the answer.
1388	Bergaptol	LC-ESI-qTof	positive	202.027	C11H6O4	1	1	5	196	31	6	1.09524	0	1	0.285714	1	1	0.0619048	1.60875	0.0008497	successful ranked
1389	Peonidin-3-glucoside	LC-ESI-QTOF	negative	463.124	C22H23O11	1	1	9	8	8	6	1.75	0	1	0.75	1	0	0.178571	53.9891	0.0008084	successful ranked
1390	Peonidin-3-glucoside	LC-ESI-QTOF	positive	463.124	C22H23O11	5	6	9	4	4	1	1.66667	0	0	0.25	0	1	0.166667	74.5083	0.0005063	successful ranked
1391	Secoisolariciresinol	LC-ESI-qTof	positive	362.173	C20H26O6	1	1	7	77	30	7	1.0582	0	1	0.25	0	1	0.00793651	6.67651	0.001131	successful ranked
1392	2-Hydroxypyridine	LC-ESI-QTOF	positive	95.0371	C5H5NO	1	1	1	4	2	-1	0.999999	-1	-1	-1	-1	-1	-1	10.3147	-1	Single candidate matches with the answer.
1393	N4-Acetylsulfamethoxazole	LC-ESI-QTOF	negative	295.063	C12H13N3O4S	1	1	4	3	2	1	2	0	1	0.5	1	1	1	67.9033	0.0001871	successful ranked
1394	N4-Acetylsulfamethoxazole	LC-ESI-QTOF	negative	295.063	C12H13N3O4S	1	1	4	3	4	2	1.5	0	1	0.5	1	1	0.333333	47.9062	0.0002345	successful ranked
1395	N4-Acetylsulfamethoxazole	LC-ESI-QTOF	positive	295.063	C12H13N3O4S	1	1	4	11	9	6	1.25	1	1	0.666667	1	1	0.222222	24.4686	0.000337	successful ranked
1396	N4-Acetylsulfamethoxazole	LC-ESI-QTOF	positive	295.063	C12H13N3O4S	1	1	4	34	30	20	1.18966	1	1	0.689655	1	1	0.174877	6.20452	0.0007769	successful ranked
1397	N4-Acetylsulfamethoxazole	LC-ESI-QTOF	positive	295.063	C12H13N3O4S	1	1	4	25	25	18	1.14667	0	1	0.72	1	1	0.116667	19.0943	0.0005837	successful ranked
1398	N4-Acetylsulfamethoxazole	LC-ESI-QTOF	positive	295.063	C12H13N3O4S	1	1	4	13	14	11	1.23077	0	1	0.785714	1	1	0.197802	25.5431	0.0004206	successful ranked
1399	N4-Acetylsulfamethoxazole	LC-ESI-QTOF	positive	295.063	C12H13N3O4S	1	1	4	6	7	5	1.33333	0	1	0.714286	1	1	0.285714	53.3952	0.0003317	successful ranked
1400	Verapamil metabolite D-617	LC-ESI-QTOF	positive	290.199	C17H26N2O2	1	1	1	12	10	-1	0.999998	-1	-1	-1	-1	-1	-1	12.1289	-1	Single candidate matches with the answer.
1401	Verapamil metabolite D-617	LC-ESI-QTOF	positive	290.199	C17H26N2O2	1	1	1	13	11	-1	0.999998	-1	-1	-1	-1	-1	-1	13.223	-1	Single candidate matches with the answer.
1402	Verapamil metabolite D-617	LC-ESI-QTOF	positive	290.199	C17H26N2O2	1	1	1	84	30	-1	0.999998	-1	-1	-1	-1	-1	-1	3.48662	-1	Single candidate matches with the answer.
1403	Verapamil metabolite D-617	LC-ESI-QTOF	positive	290.199	C17H26N2O2	1	1	1	112	30	-1	0.999998	-1	-1	-1	-1	-1	-1	3.33445	-1	Single candidate matches with the answer.
1404	Verapamil metabolite D-617	LC-ESI-QTOF	positive	290.199	C17H26N2O2	1	1	1	178	30	-1	0.999998	-1	-1	-1	-1	-1	-1	3.52648	-1	Single candidate matches with the answer.
1405	Valsartan	LC-ESI-qTof	positive	435.227	C24H29N5O3	1	1	3	429	30	10	1.06667	1	1	0.333333	1	1	0.0413793	1.3703	0.0006098	successful ranked
1406	Valsartan	LC-ESI-qTof	positive	435.227	C24H29N5O3	1	1	3	964	30	16	1.1954	1	1	0.533333	1	1	0.117241	0.985121	0.0006372	successful ranked
1407	Valsartan	LC-ESI-QTOF	negative	435.227	C24H29N5O3	1	2	3	4	3	1	1.33333	0	0	0.333333	1	0	0	85.5395	0.0001768	successful ranked
1408	Valsartan	LC-ESI-QTOF	positive	435.227	C24H29N5O3	1	1	3	21	19	8	1.14035	1	1	0.421053	1	0	0.0350877	17.9341	0.0004329	successful ranked
1409	Valsartan	LC-ESI-QTOF	positive	435.227	C24H29N5O3	1	1	3	41	30	22	1.37931	1	1	0.733333	1	1	0.227586	17.7788	0.0006337	successful ranked
1410	Valsartan	LC-ESI-QTOF	positive	435.227	C24H29N5O3	1	1	3	29	30	16	1.17011	1	1	0.533333	1	1	0.112644	18.0489	0.0006241	successful ranked
1411	Valsartan	LC-ESI-QTOF	positive	435.227	C24H29N5O3	1	1	3	35	30	19	1.16092	1	1	0.633333	1	1	0.0712644	23.5511	0.0005742	successful ranked
1412	Valsartan	LC-ESI-QTOF	positive	435.227	C24H29N5O3	1	1	3	45	30	19	1.18161	1	1	0.633333	1	1	0.0505747	22.1419	0.0006354	successful ranked
1413	Valsartan	LC-ESI-QTOF	positive	435.227	C24H29N5O3	1	1	3	27	28	16	1.24603	1	1	0.571429	1	1	0.164021	13.9145	0.0005681	successful ranked
1414	Ramipril	LC-ESI-qTof	positive	416.231	C23H32N2O5	1	1	6	151	30	15	1.11034	0	1	0.5	1	1	0.0597701	3.20499	0.0010184	successful ranked
1415	Ramipril	LC-ESI-qTof	positive	416.231	C23H32N2O5	1	1	6	418	30	15	1.12	0	1	0.6	1	1	0.0433333	1.65	0.0010728	successful ranked
1416	Masoprocol	LC-ESI-qTOF	positive	302.152	C18H22O4	6	6	6	1000	30	8	1.17241	0	1	0.266667	0	1	0.0321839	0.581499	0.0010888	successful ranked
1417	Amphetamine	LC-ESI-QTOF	positive	135.105	C9H13N	1	1	1	4	3	-1	0.999999	-1	-1	-1	-1	-1	-1	10.6204	-1	Single candidate matches with the answer.
1418	Tramadol	LC-ESI-qTof	positive	263.189	C16H25NO2	1	1	3	125	32	4	1.08791	0	1	0.285714	1	1	0.032967	2.6358	0.0005608	successful ranked
1419	Tramadol	LC-ESI-QTOF	positive	263.189	C16H25NO2	1	1	3	8	8	2	1.10714	0	1	0.25	1	1	0.0714286	16.9005	0.0002694	successful ranked
1420	Tramadol	LC-ESI-QTOF	positive	263.189	C16H25NO2	1	1	3	7	8	3	1.21429	0	1	0.375	1	1	0.107143	14.1698	0.0002627	successful ranked
1421	Tramadol	LC-ESI-QTOF	positive	263.189	C16H25NO2	1	1	3	11	12	7	1.39394	0	1	0.583333	1	1	0.348485	26.3409	0.000342	successful ranked
1422	Tramadol	LC-ESI-QTOF	positive	263.189	C16H25NO2	1	1	3	10	11	6	1.29091	0	1	0.545455	1	1	0.236364	31.7514	0.0002975	successful ranked
1423	Vidarabine	LC-ESI-qTof	positive	267.097	C10H13N5O4	1	1	4	58	32	4	1.07273	1	1	0.363636	1	1	0.0181818	8.92358	0.0006616	successful ranked
1424	Betaxolol	LC-ESI-qTof	positive	307.215	C18H29NO3	1	1	1	60	31	-1	0.999997	-1	-1	-1	-1	-1	-1	8.32906	-1	Single candidate matches with the answer.
1425	Betaxolol	LC-ESI-QTOF	positive	307.215	C18H29NO3	1	1	1	18	18	-1	0.999997	-1	-1	-1	-1	-1	-1	8.39047	-1	Single candidate matches with the answer.
1426	Betaxolol	LC-ESI-QTOF	positive	307.215	C18H29NO3	1	1	1	87	30	-1	0.999997	-1	-1	-1	-1	-1	-1	5.41861	-1	Single candidate matches with the answer.
1427	Betaxolol	LC-ESI-QTOF	positive	307.215	C18H29NO3	1	1	1	78	30	-1	0.999997	-1	-1	-1	-1	-1	-1	13.8139	-1	Single candidate matches with the answer.
1428	Betaxolol	LC-ESI-QTOF	positive	307.215	C18H29NO3	1	1	1	60	30	-1	0.999997	-1	-1	-1	-1	-1	-1	17.5607	-1	Single candidate matches with the answer.
1429	Oseltamivir	LC-ESI-QTOF	positive	312.205	C16H28N2O4	1	1	3	23	21	13	1.3	0	1	0.619048	1	1	0.27619	13.1509	0.000421	successful ranked
1430	Oseltamivir	LC-ESI-QTOF	positive	312.205	C16H28N2O4	1	1	3	32	30	21	1.35172	0	1	0.7	1	1	0.262069	10.7059	0.0005613	successful ranked
1431	Oseltamivir	LC-ESI-QTOF	positive	312.205	C16H28N2O4	1	1	3	39	30	21	1.31034	0	1	0.724138	1	1	0.23399	14.1929	0.000597	successful ranked
1432	Oseltamivir	LC-ESI-QTOF	positive	312.205	C16H28N2O4	1	1	3	31	30	21	1.2734	0	1	0.724138	1	1	0.194581	23.1893	0.0005564	successful ranked
1433	Oseltamivir	LC-ESI-QTOF	positive	312.205	C16H28N2O4	1	1	3	15	16	9	1.20952	0	1	0.6	1	1	0.12381	37.1134	0.0004042	successful ranked
1434	Erythromycin	LC-ESI-QTOF	positive	733.461	C37H67NO13	2	3	3	3	3	1	2	0	0	0.333333	0	1	0.666667	183.978	0.0001981	successful ranked
1435	Erythromycin	LC-ESI-QTOF	positive	733.461	C37H67NO13	1	2	3	2	3	2	2	0	0	0.666667	1	0	0	183.962	0.0002125	successful ranked
1436	Erythromycin	LC-ESI-QTOF	positive	733.461	C37H67NO13	2	3	3	2	3	1	1.66667	0	0	0.333333	0	1	0.333333	406.123	0.0001883	successful ranked
1437	Erythromycin	LC-ESI-QTOF	positive	733.461	C37H67NO13	1	1	3	24	18	7	1.0915	0	1	0.388889	1	1	0.0457516	49.1803	0.000411	successful ranked
1438	Erythromycin	LC-ESI-QTOF	positive	733.461	C37H67NO13	1	1	3	47	21	9	1.11905	0	1	0.428571	1	0	0.0380952	24.7499	0.0004366	successful ranked
1439	Erythromycin	LC-ESI-QTOF	positive	733.461	C37H67NO13	2	2	3	54	27	9	1.10826	0	1	0.333333	0	1	0.039886	19.6362	0.0005343	successful ranked
1440	Erythromycin	LC-ESI-QTOF	positive	733.461	C37H67NO13	1	2	3	58	30	9	1.08276	0	0	0.3	0	1	0	21.9209	0.0005927	successful ranked
1441	Reserpine	LC-ESI-QTOF	positive	608.273	C33H40N2O9	1	3	7	5	2	1	2	0	0	0.5	1	0	0	0	0.0003138	successful ranked
1442	Reserpine	LC-ESI-QTOF	positive	608.273	C33H40N2O9	1	1	7	6	3	2	2	0	1	0.666667	1	1	0.666667	120.696	0.0003695	successful ranked
1443	Reserpine	LC-ESI-QTOF	positive	608.273	C33H40N2O9	1	1	7	16	12	10	1.62121	0	1	0.833333	1	1	0.409091	45.0046	0.0006937	successful ranked
1444	Reserpine	LC-ESI-QTOF	positive	608.273	C33H40N2O9	1	1	7	38	30	25	1.51034	0	1	0.833333	1	1	0.193103	24.9383	0.0012748	successful ranked
1445	Reserpine	LC-ESI-QTOF	positive	608.273	C33H40N2O9	1	1	7	41	30	24	1.37931	0	1	0.8	1	1	0.151724	26.2791	0.0012428	successful ranked
1446	Reserpine	LC-ESI-QTOF	positive	608.273	C33H40N2O9	1	3	7	7	3	1	1.33333	0	0	0.333333	1	0	0	119.67	0.0003191	successful ranked
1447	Reserpine	LC-ESI-QTOF	positive	608.273	C33H40N2O9	2	4	7	13	9	3	1.25	0	0	0.333333	0	1	0.138889	48.3247	0.0005677	successful ranked
1448	Reserpine	LC-ESI-QTOF	positive	608.273	C33H40N2O9	1	1	7	35	21	13	1.15714	0	1	0.619048	1	0	0.0285714	27.4238	0.0009941	successful ranked
1449	Reserpine	LC-ESI-QTOF	positive	608.273	C33H40N2O9	1	1	7	125	31	18	1.13793	0	1	0.6	1	1	0.0551724	10.2404	0.0012129	successful ranked
1450	Reserpine	LC-ESI-QTOF	positive	608.273	C33H40N2O9	1	1	7	199	31	18	1.16774	0	1	0.580645	0	1	0.0344086	7.31887	0.0012892	successful ranked
1451	Azithromycin	LC-ESI-qTof	positive	748.509	C38H72N2O12	1	1	3	218	30	17	1.27635	0	1	0.62963	0	1	0.042735	6.35217	0.0006362	successful ranked
1452	Azithromycin	LC-ESI-qTof	positive	748.509	C38H72N2O12	1	1	3	1000	30	22	1.48923	0	1	0.846154	1	0	0.08	2.20221	0.0007102	successful ranked
1453	Azithromycin	LC-ESI-qTof	positive	748.509	C38H72N2O12	1	1	3	1000	30	16	1.31522	0	1	0.666667	1	1	0.134058	1.27791	0.0005782	successful ranked
1454	Lovastatin	LC-ESI-qTof	positive	404.256	C24H36O5	3	3	5	68	32	3	1.04	0	1	0.115385	0	1	0.0153846	5.87049	0.0009133	successful ranked
1455	Lovastatin	LC-ESI-qTof	positive	404.256	C24H36O5	3	3	5	68	32	3	1.04	0	1	0.115385	0	1	0.0153846	5.87049	0.0008874	successful ranked
1456	Lovastatin	LC-ESI-qTof	positive	404.256	C24H36O5	1	1	5	1000	30	24	1.46667	0	1	0.8	1	1	0.144828	0.792719	0.0009906	successful ranked
1457	Lovastatin	LC-ESI-QTOF	positive	404.256	C24H36O5	2	2	5	33	30	10	1.14245	0	1	0.37037	0	1	0.025641	15.6083	0.0008847	successful ranked
1458	Lovastatin	LC-ESI-QTOF	positive	404.256	C24H36O5	1	1	5	54	30	19	1.39655	0	1	0.655172	1	1	0.184729	13.7356	0.0009341	successful ranked
1459	Lovastatin	LC-ESI-QTOF	positive	404.256	C24H36O5	1	1	5	73	30	23	1.6046	0	1	0.766667	1	1	0.147126	12.1392	0.0010668	successful ranked
1460	Lovastatin	LC-ESI-QTOF	positive	404.256	C24H36O5	1	1	5	84	30	25	1.76108	0	1	0.862069	1	1	0.0566502	11.7339	0.0010868	successful ranked
1461	Lovastatin	LC-ESI-QTOF	positive	404.256	C24H36O5	1	3	5	66	30	21	1.52463	0	0	0.724138	1	0	0	20.3031	0.0010414	successful ranked
1462	Pregabalin	LC-ESI-QTOF	positive	159.126	C8H17NO2	1	1	1	8	7	-1	0.999998	-1	-1	-1	-1	-1	-1	8.16447	-1	Single candidate matches with the answer.
1463	Pregabalin	LC-ESI-QTOF	positive	159.126	C8H17NO2	1	1	1	6	6	-1	0.999998	-1	-1	-1	-1	-1	-1	8.54141	-1	Single candidate matches with the answer.
1464	Aminosalicylic Acid	LC-ESI-qTof	positive	153.043	C7H7NO3	1	2	2	1679	30	1	1.00333	0	0	0.04	1	0	0	0.143532	0.0003519	successful ranked
1465	Milrinone	LC-ESI-qTof	positive	211.075	C12H9N3O	1	1	5	236	30	9	1.1087	0	1	0.375	1	0	0.0181159	1.36467	0.0008397	successful ranked
1466	Ranolazine	LC-ESI-qTof	positive	427.247	C24H33N3O4	1	1	4	208	30	5	1.04211	1	1	0.25	0	1	0.0105263	3.09638	0.0006984	successful ranked
1467	Dapsone	LC-ESI-qTof	positive	248.062	C12H12N2O2S	1	1	6	107	30	5	1.13187	0	1	0.357143	1	1	0.0769231	8.15786	0.0009712	successful ranked
1468	Dapsone	LC-ESI-QTOF	positive	248.062	C12H12N2O2S	1	1	6	28	26	17	1.33202	0	1	0.73913	1	1	0.256917	18.8077	0.0009497	successful ranked
1469	Phenytoin	LC-ESI-qTof	positive	252.09	C15H12N2O2	1	1	6	220	15	6	1.15385	0	1	0.428571	0	1	0.021978	1.71368	0.0006977	successful ranked
1470	Phenytoin	LC-ESI-qTof	positive	252.09	C15H12N2O2	2	2	6	315	30	4	1.10989	0	1	0.285714	0	1	0.032967	1.56905	0.000995	successful ranked
1471	Medrysone	LC-ESI-qTof	positive	344.235	C22H32O3	1	1	3	399	30	22	1.50985	0	1	0.758621	1	1	0.485222	1.01249	0.0006008	successful ranked
1472	Medrysone	LC-ESI-qTof	positive	344.235	C22H32O3	3	3	3	438	31	3	1.03261	0	1	0.125	0	0	0	5.12118	0.0004874	successful ranked
1473	Sulfanilamide	LC-ESI-QTOF	positive	172.031	C6H8N2O2S	1	1	3	5	5	3	1.5	0	1	0.6	1	1	0.4	12.5364	0.0002577	successful ranked
1474	Sulfisoxazole	LC-ESI-qTof	positive	267.068	C11H13N3O3S	1	1	4	473	33	8	1.16484	1	1	0.571429	1	1	0.0879121	2.2122	0.0006684	successful ranked
1475	Sulfisoxazole	LC-ESI-QTOF	positive	267.068	C11H13N3O3S	1	1	4	32	31	20	1.28276	1	1	0.666667	1	1	0.108046	16.7134	0.0008063	successful ranked
1476	Isradipine	LC-ESI-qTof	positive	371.148	C19H21N3O5	1	1	8	337	30	7	1.08225	0	1	0.318182	1	1	0.038961	1.55353	0.0013063	successful ranked
1477	Isradipine	LC-ESI-qTof	positive	371.148	C19H21N3O5	1	1	8	418	30	16	1.16322	1	1	0.533333	1	1	0.062069	1.17423	0.001546	successful ranked
1478	Olmesartan	LC-ESI-qTof	positive	446.207	C24H26N6O3	1	1	7	46	31	12	1.12	0	1	0.461538	1	0	0.0184615	11.3961	0.0013461	successful ranked
1479	Lidocaine	LC-ESI-QTOF	positive	234.173	C14H22N2O	1	1	2	4	4	0	0.999998	-1	0	-1	-1	-1	-1	18.1197	0.0001269	No mother-daughter relation is found for all the precursor formula.
1480	Lidocaine	LC-ESI-QTOF	positive	234.173	C14H22N2O	1	1	2	8	8	3	1.21429	0	1	0.375	1	1	0.214286	20.7492	0.0001967	successful ranked
1481	Lidocaine	LC-ESI-QTOF	positive	234.173	C14H22N2O	1	1	2	3	4	3	2	0	1	0.75	1	1	0.833333	25.0628	0.0001744	successful ranked
1482	Lidocaine	LC-ESI-QTOF	positive	234.173	C14H22N2O	1	2	2	3	3	2	2	0	0	0.666667	1	0	0	85.5971	0.0001632	successful ranked
1483	Atomoxetine	LC-ESI-qTof	positive	255.162	C17H21NO	1	1	2	72	30	4	1.06667	0	1	0.25	1	0	0.0166667	4.17227	0.0004199	successful ranked
1484	Morphine	LC-ESI-QTOF	positive	285.136	C17H19NO3	1	1	5	3	1	0	0.999998	-1	0	-1	-1	-1	-1	0	0	No mother-daughter relation is found for all the precursor formula.
1485	Morphine	LC-ESI-QTOF	positive	285.136	C17H19NO3	1	1	5	7	5	4	1.8	0	1	0.8	1	0	0.1	12.4453	0.0003918	successful ranked
1486	Morphine	LC-ESI-QTOF	positive	285.136	C17H19NO3	2	2	5	46	30	21	1.30115	0	1	0.7	1	0	0.0344828	5.7208	0.0010426	successful ranked
1487	Morphine	LC-ESI-QTOF	positive	285.136	C17H19NO3	1	1	5	194	30	25	1.47126	0	1	0.833333	1	0	0.250575	1.50157	0.0010499	successful ranked
1488	Morphine	LC-ESI-QTOF	positive	285.136	C17H19NO3	1	1	5	147	30	22	1.4069	0	1	0.733333	1	1	0.229885	2.88928	0.0009619	successful ranked
1489	Vindesine	LC-ESI-qTof	positive	753.41	C43H55N5O7	1	1	3	413	30	14	1.1908	1	1	0.466667	1	1	0.0896552	2.4068	0.0006665	successful ranked
1490	Ethoxzolamide	LC-ESI-qTof	positive	258.013	C9H10N2O3S2	1	1	6	902	30	19	1.16995	0	1	0.655172	1	1	0.115764	1.04508	0.0010757	successful ranked
1491	Piperacillin	LC-ESI-QTOF	negative	517.163	C23H27N5O7S	9	9	11	6	6	2	1.4	1	0	0.333333	0	0	0	67.0725	0.0008062	successful ranked
1492	Piperacillin	LC-ESI-QTOF	positive	517.163	C23H27N5O7S	6	7	11	7	7	3	1.33333	1	0	0.5	0	0	0.0666667	89.8246	0.0009203	successful ranked
1493	Amitriptyline	LC-ESI-QTOF	positive	277.183	C20H23N	2	2	5	46	30	20	1.50805	0	1	0.666667	0	1	0.121839	7.67727	0.0009458	successful ranked
1494	Amitriptyline	LC-ESI-QTOF	positive	277.183	C20H23N	1	3	5	4	2	1	2	0	0	0.5	1	0	0	0	0.0002338	successful ranked
1495	Amitriptyline	LC-ESI-QTOF	positive	277.183	C20H23N	1	1	5	18	16	13	1.74167	0	1	0.8125	1	0	0.208333	11.7676	0.0006388	successful ranked
1496	Amitriptyline	LC-ESI-QTOF	positive	277.183	C20H23N	2	2	5	40	30	20	1.54713	0	1	0.666667	0	1	0.121839	7.98732	0.0009664	successful ranked
1497	Amitriptyline	LC-ESI-QTOF	positive	277.183	C20H23N	1	1	5	42	30	21	1.51724	0	1	0.7	0	1	0.016092	7.47322	0.0009288	successful ranked
1498	Amitriptyline	LC-ESI-QTOF	positive	277.183	C20H23N	1	1	5	43	30	22	1.54713	0	1	0.733333	0	1	0.108046	7.70376	0.0009342	successful ranked
1499	Tolcapone	LC-ESI-qTof	positive	273.064	C14H11NO5	1	1	7	121	31	7	1.125	0	1	0.411765	0	1	0.0367647	3.14722	0.0011686	successful ranked
1500	Methadone	LC-ESI-QTOF	positive	309.209	C21H27NO	2	2	3	4	4	3	1.83333	0	0	0.75	1	0	0	18.5785	0.0002167	successful ranked
1501	Methadone	LC-ESI-QTOF	positive	309.209	C21H27NO	2	2	3	69	30	15	1.26601	0	1	0.517241	0	1	0.0246305	5.6854	0.0007742	successful ranked
1502	Methadone	LC-ESI-QTOF	positive	309.209	C21H27NO	1	1	3	83	30	21	1.37931	0	1	0.7	1	1	0.165517	5.24723	0.0006768	successful ranked
1503	Methadone	LC-ESI-QTOF	positive	309.209	C21H27NO	1	1	3	70	30	15	1.22989	0	1	0.5	0	1	0.0252874	8.75926	0.0011004	successful ranked
1504	Terfenadine	LC-ESI-qTof	positive	471.314	C32H41NO2	3	3	3	1274	30	6	1.27356	0	1	0.2	0	1	0.195402	1.02077	0.0006976	successful ranked
1505	Terfenadine	LC-ESI-QTOF	positive	471.314	C32H41NO2	1	2	3	3	3	2	2	0	0	0.666667	1	0	0	10.3965	0.0002256	successful ranked
1506	Terfenadine	LC-ESI-QTOF	positive	471.314	C32H41NO2	1	1	3	10	10	9	1.93333	0	1	0.9	1	1	0.377778	52.2627	0.0003409	successful ranked
1507	Terfenadine	LC-ESI-QTOF	positive	471.314	C32H41NO2	1	1	3	54	30	26	1.55862	0	1	0.866667	1	1	0.131034	17.8231	0.0008026	successful ranked
1508	Terfenadine	LC-ESI-QTOF	positive	471.314	C32H41NO2	2	2	3	98	30	19	1.43386	0	1	0.678571	0	1	0.0820106	13.8715	0.0006715	successful ranked
1509	Minoxidil	LC-ESI-qTof	positive	209.128	C9H15N5O	1	1	2	436	30	12	1.12	1	1	0.461538	1	1	0.12	0.477688	0.0004671	successful ranked
1510	Aminoglutethimide	LC-ESI-qTof	positive	232.121	C13H16N2O2	1	1	3	855	30	17	1.26437	0	1	0.566667	1	1	0.110345	0.317655	0.0005853	successful ranked
1511	Aminoglutethimide	LC-ESI-qTof	positive	232.121	C13H16N2O2	2	3	3	187	30	2	1.01976	0	0	0.0869565	0	1	0.0118577	2.08127	0.0005255	successful ranked
1512	Aminoglutethimide	LC-ESI-qTof	positive	232.121	C13H16N2O2	1	1	3	846	30	20	1.34975	0	1	0.689655	1	1	0.160099	0.602842	0.0006433	successful ranked
1513	Sulfadiazine	LC-ESI-QTOF	positive	250.052	C10H10N4O2S	2	3	5	6	4	1	1.5	1	0	0.25	0	1	0.333333	35.1277	0.0002952	successful ranked
1514	Sulfadiazine	LC-ESI-QTOF	positive	250.052	C10H10N4O2S	3	4	5	8	7	1	1.14286	1	0	0.142857	0	1	0.0952381	25.2675	0.0003447	successful ranked
1515	Sulfadiazine	LC-ESI-QTOF	positive	250.052	C10H10N4O2S	2	4	5	5	6	1	1.13333	1	0	0.166667	0	1	0.0666667	27.1788	0.0003247	successful ranked
1516	Levonorgestrel	LC-ESI-qTof	positive	312.209	C21H28O2	3	3	4	772	30	5	1.13333	0	1	0.166667	0	1	0.0942529	0.492448	0.0007179	successful ranked
1517	Mirtazapine	LC-ESI-qTof	positive	265.158	C17H19N3	2	2	5	571	30	13	1.33846	0	1	0.5	0	1	0.116923	1.26302	0.0010382	successful ranked
1518	Mirtazapine	LC-ESI-qTof	positive	265.158	C17H19N3	1	1	5	406	30	21	1.52991	0	1	0.777778	1	1	0.321937	1.24008	0.0009854	successful ranked
1519	Mirtazapine	LC-ESI-qTof	positive	265.158	C17H19N3	2	2	5	332	22	11	1.27706	0	1	0.5	0	1	0.017316	0.910238	0.00082	successful ranked
1520	Mirtazapine	LC-ESI-QTOF	positive	265.158	C17H19N3	1	2	5	7	5	3	2	0	0	0.75	1	0	0	9.02263	0.0005311	successful ranked
1521	Mirtazapine	LC-ESI-QTOF	positive	265.158	C17H19N3	1	1	5	6	4	3	2	0	1	0.75	1	0	0.333333	26.7963	0.0003943	successful ranked
1522	Mirtazapine	LC-ESI-QTOF	positive	265.158	C17H19N3	2	2	5	4	4	2	1.66667	0	1	0.5	0	1	0.166667	26.7144	0.0004197	successful ranked
1523	Mirtazapine	LC-ESI-QTOF	positive	265.158	C17H19N3	2	2	5	8	9	6	1.58333	0	1	0.666667	0	1	0.0277778	22.9968	0.0005569	successful ranked
1524	Mirtazapine	LC-ESI-QTOF	positive	265.158	C17H19N3	2	2	5	32	30	18	1.30345	0	1	0.6	0	1	0.0482759	8.13176	0.0010695	successful ranked
1525	Meprobamate	LC-ESI-QTOF	positive	218.127	C9H18N2O4	1	1	2	4	4	3	2	0	1	0.75	1	1	0.833333	26.9184	0.0001766	successful ranked
1526	Meprobamate	LC-ESI-QTOF	positive	218.127	C9H18N2O4	1	1	2	9	10	9	1.68889	0	1	0.9	1	1	0.466667	21.1118	0.0002283	successful ranked
1527	Meprobamate	LC-ESI-QTOF	positive	218.127	C9H18N2O4	1	1	2	8	9	7	1.57143	0	1	0.875	1	1	0.214286	41.711	0.000216	successful ranked
1528	Meprobamate	LC-ESI-QTOF	positive	218.127	C9H18N2O4	1	1	2	6	7	6	1.57143	0	1	0.857143	1	1	0.0952381	59.9863	0.0001906	successful ranked
1529	Meprobamate	LC-ESI-QTOF	positive	218.127	C9H18N2O4	1	1	2	6	7	6	1.57143	0	1	0.857143	1	1	0.0952381	59.9659	0.0001777	successful ranked
1530	Thiethylperazine	LC-ESI-QTOF	positive	399.18	C22H29N3S2	2	2	10	6	6	5	1.66667	0	1	0.833333	1	0	0.0666667	38.0391	0.0007932	successful ranked
1531	Thiethylperazine	LC-ESI-QTOF	positive	399.18	C22H29N3S2	5	5	10	12	12	5	1.34545	0	1	0.454545	0	0	0.0181818	29.6704	0.0009808	successful ranked
1532	Thiethylperazine	LC-ESI-QTOF	positive	399.18	C22H29N3S2	1	2	10	23	24	13	1.21344	0	0	0.565217	0	1	0	26.5968	0.001506	successful ranked
1533	Thiethylperazine	LC-ESI-QTOF	positive	399.18	C22H29N3S2	2	2	10	27	28	13	1.17664	0	1	0.481481	0	0	0.00854701	26.8846	0.0020159	successful ranked
1534	Dydrogesterone	LC-ESI-qTof	positive	312.209	C21H28O2	2	2	4	721	30	9	1.29655	0	1	0.3	0	1	0.222989	1.23549	0.0007638	successful ranked
1535	Mexiletine	LC-ESI-qTof	positive	179.131	C11H17NO	1	1	2	168	30	14	1.28986	0	1	0.583333	1	1	0.108696	1.43544	0.0004226	successful ranked
1536	Mexiletine	LC-ESI-qTof	positive	179.131	C11H17NO	1	1	2	125	31	9	1.1581	0	1	0.391304	1	1	0.0316206	1.87917	0.000391	successful ranked
1537	Carbimazole	LC-ESI-qTof	positive	186.046	C7H10N2O2S	1	1	3	110	30	5	1.13333	0	1	0.333333	1	1	0.12381	2.14402	0.000552	successful ranked
1538	Sulpiride	LC-ESI-qTof	positive	341.141	C15H23N3O4S	1	1	7	729	32	12	1.16316	1	1	0.6	1	1	0.0842105	0.939637	0.0012529	successful ranked
1539	Sulpiride	LC-ESI-QTOF	positive	341.141	C15H23N3O4S	1	1	7	5	3	2	1.66667	0	1	0.666667	1	1	0.333333	18.5456	0.0003811	successful ranked
1540	Sulpiride	LC-ESI-QTOF	positive	341.141	C15H23N3O4S	1	1	7	9	7	5	1.86667	0	1	0.833333	1	1	0.466667	36.7366	0.0006076	successful ranked
1541	Sulpiride	LC-ESI-QTOF	positive	341.141	C15H23N3O4S	2	2	7	9	6	3	1.4	1	1	0.6	1	0	0.1	19.2996	0.0004938	successful ranked
1542	Sulpiride	LC-ESI-QTOF	positive	341.141	C15H23N3O4S	1	1	7	7	8	4	1.25	1	1	0.5	1	1	0.142857	43.7485	0.0005179	successful ranked
1543	Carisoprodol	LC-ESI-qTof	positive	260.174	C12H24N2O4	1	1	2	133	32	8	1.1634	0	1	0.444444	1	1	0.104575	3.80069	0.0004008	successful ranked
1544	Mupirocin	LC-ESI-qTof	positive	500.299	C26H44O9	1	1	7	514	31	22	1.46667	0	1	0.733333	0	1	0.131034	1.65717	0.0013086	successful ranked
1545	Mupirocin	LC-ESI-qTof	positive	500.299	C26H44O9	1	2	7	1941	30	21	1.34253	0	0	0.7	1	0	0	1.17953	0.0013571	successful ranked
1546	Methocarbamol	LC-ESI-qTof	positive	241.095	C11H15NO5	1	1	5	234	30	15	1.18851	0	1	0.5	0	1	0.0643678	2.11834	0.000896	successful ranked
1547	Methocarbamol	LC-ESI-qTof	positive	241.095	C11H15NO5	1	1	5	135	31	17	1.25057	0	1	0.566667	0	1	0.0091954	3.12334	0.0009337	successful ranked
1548	Hyoscyamine	LC-ESI-qTof	positive	289.168	C17H23NO3	1	1	4	1000	25	11	1.30719	0	1	0.611111	1	1	0.150327	0.681421	0.0007246	successful ranked
1549	Cyproheptadine	LC-ESI-qTof	positive	287.167	C21H21N	1	1	5	276	30	16	1.25862	0	1	0.551724	1	1	0.046798	1.18951	0.001077	successful ranked
1550	Trimethoprim	LC-ESI-qTof	positive	290.138	C14H18N4O3	1	1	4	1000	30	11	1.11264	1	1	0.366667	1	0	0.0206897	0.38786	0.000732	successful ranked
1551	Epirubicin	LC-ESI-qTof	positive	543.174	C27H29NO11	5	5	10	412	30	12	1.12184	0	1	0.4	0	1	0.0114943	1.91179	0.001756	successful ranked
1552	Prazosin	LC-ESI-QTOF	negative	383.159	C19H21N5O4	3	3	4	15	15	3	1.07273	0	0	0.272727	0	1	0.0181818	15.4983	0.0004511	successful ranked
1553	Prazosin	LC-ESI-QTOF	positive	383.159	C19H21N5O4	1	2	4	3	3	2	2	0	0	0.666667	1	0	0	64.1623	0.0002461	successful ranked
1554	Prazosin	LC-ESI-QTOF	positive	383.159	C19H21N5O4	2	2	4	34	30	17	1.33793	1	1	0.566667	0	1	0.0183908	9.23787	0.0007422	successful ranked
1555	Prazosin	LC-ESI-QTOF	positive	383.159	C19H21N5O4	1	1	4	54	30	14	1.15862	1	1	0.466667	0	1	0.0045977	6.72524	0.0007442	successful ranked
1556	Prazosin	LC-ESI-QTOF	positive	383.159	C19H21N5O4	2	2	4	40	30	10	1.13563	1	1	0.333333	0	1	0.0597701	12.6319	0.0006789	successful ranked
1557	Prazosin	LC-ESI-QTOF	positive	383.159	C19H21N5O4	3	4	4	5	5	0	1.2	0	0	0	0	0	0	59.5978	0.000294	successful ranked
1558	Prazosin	LC-ESI-QTOF	positive	383.159	C19H21N5O4	2	2	4	16	16	3	1.09167	1	1	0.1875	0	1	0.0583333	17.9423	0.0004522	successful ranked
1559	Prazosin	LC-ESI-QTOF	positive	383.159	C19H21N5O4	2	2	4	48	30	16	1.1931	1	1	0.533333	1	0	0.0206897	6.58216	0.0007269	successful ranked
1560	Acitretin	LC-ESI-qTof	positive	326.188	C21H26O3	3	3	7	55	30	3	1.03667	0	1	0.12	0	1	0.01	7.76808	0.0011165	successful ranked
1561	Nabumetone	LC-ESI-qTof	positive	228.115	C15H16O2	1	2	5	97	16	4	1.12821	0	0	0.307692	1	0	0	2.59942	0.0005736	successful ranked
1562	Nabumetone	LC-ESI-qTof	positive	228.115	C15H16O2	1	1	5	69	22	4	1.07353	0	1	0.235294	0	1	0.0147059	4.52849	0.0006864	successful ranked
1563	Nabumetone	LC-ESI-qTof	positive	228.115	C15H16O2	1	1	5	917	30	7	1.06878	0	1	0.25	0	1	0.00793651	0.650204	0.0008625	successful ranked
1564	Ketorolac	LC-ESI-QTOF	positive	255.09	C15H13NO3	1	1	6	3	3	2	1.66667	0	1	0.666667	1	1	0.333333	86.3226	0.0003218	successful ranked
1565	Ketorolac	LC-ESI-QTOF	positive	255.09	C15H13NO3	1	1	6	7	7	6	1.80952	0	1	0.857143	1	1	0.380952	26.3616	0.0004983	successful ranked
1566	Ketorolac	LC-ESI-QTOF	positive	255.09	C15H13NO3	1	1	6	10	11	9	1.61818	0	1	0.818182	1	1	0.290909	17.4077	0.0005882	successful ranked
1567	Ketorolac	LC-ESI-QTOF	positive	255.09	C15H13NO3	1	1	6	13	14	10	1.71212	0	1	0.833333	1	1	0.439394	16.5688	0.0006803	successful ranked
1568	Ketorolac	LC-ESI-QTOF	positive	255.09	C15H13NO3	1	1	6	12	13	9	1.47436	0	1	0.692308	1	0	0.0512821	24.6211	0.0006293	successful ranked
1569	Duloxetine	LC-ESI-qTof	positive	297.119	C18H19NOS	2	2	7	114	30	15	1.22333	0	1	0.6	0	1	0.0133333	3.72508	0.001243	successful ranked
1570	Duloxetine	LC-ESI-qTof	positive	297.119	C18H19NOS	3	3	7	59	30	9	1.12648	0	1	0.391304	0	1	0.027668	6.48517	0.0012333	successful ranked
1571	Lenalidomide	LC-ESI-qTof	positive	259.096	C13H13N3O3	1	1	1	298	32	-1	0.999998	-1	-1	-1	-1	-1	-1	1.51899	-1	Single candidate matches with the answer.
1572	Altretamine	LC-ESI-qTof	positive	210.159	C9H18N6	1	1	1	1000	14	-1	0.999998	-1	-1	-1	-1	-1	-1	0.322089	-1	Single candidate matches with the answer.
1573	Sotalol	LC-ESI-QTOF	positive	272.119	C12H20N2O3S	1	1	7	6	6	5	1.93333	0	1	0.833333	1	1	0.333333	18.0479	0.0005561	successful ranked
1574	Sotalol	LC-ESI-QTOF	positive	272.119	C12H20N2O3S	1	1	7	10	11	9	1.78182	1	1	0.818182	1	1	0.290909	21.6791	0.0006724	successful ranked
1575	Sotalol	LC-ESI-QTOF	positive	272.119	C12H20N2O3S	1	1	7	16	17	15	1.77206	1	1	0.882353	1	0	0.0220588	25.256	0.0008854	successful ranked
1576	Buspirone	LC-ESI-qTof	positive	385.248	C21H31N5O2	3	3	3	296	30	9	1.14229	1	1	0.391304	0	1	0.0197628	5.54981	0.0005521	successful ranked
1577	Buspirone	LC-ESI-QTOF	positive	385.248	C21H31N5O2	2	3	3	3	3	0	1.66667	1	0	0	0	1	0.666667	82.7096	0.0001711	successful ranked
1578	Buspirone	LC-ESI-QTOF	positive	385.248	C21H31N5O2	1	1	3	17	17	9	1.25	1	1	0.529412	1	1	0.117647	16.1157	0.0003783	successful ranked
1579	Buspirone	LC-ESI-QTOF	positive	385.248	C21H31N5O2	1	1	3	24	25	20	1.41667	1	1	0.8	1	1	0.196667	24.9531	0.0005577	successful ranked
1580	Buspirone	LC-ESI-QTOF	positive	385.248	C21H31N5O2	1	1	3	37	30	19	1.23892	1	1	0.655172	1	1	0.0591133	27.267	0.0006731	successful ranked
1581	Fosinopril	LC-ESI-QTOF	positive	563.301	C30H46NO7P	2	2	3	14	13	5	1.08974	1	0	0.384615	1	1	0	23.3562	0.0003313	successful ranked
1582	Fosinopril	LC-ESI-QTOF	positive	563.301	C30H46NO7P	1	1	3	10	11	7	1.23636	1	1	0.636364	1	1	0.0363636	73.6306	0.0003078	successful ranked
1583	Fosinopril	LC-ESI-QTOF	positive	563.301	C30H46NO7P	1	1	3	19	20	15	1.27485	1	1	0.789474	1	1	0.0584795	42.1256	0.000505	successful ranked
1584	Fosinopril	LC-ESI-QTOF	positive	563.301	C30H46NO7P	3	3	3	21	22	13	1.19048	1	1	0.590909	1	1	0.004329	34.2082	0.0005225	successful ranked
1585	Fosinopril	LC-ESI-QTOF	positive	563.301	C30H46NO7P	1	1	3	14	15	12	1.33333	0	1	0.8	1	1	0.142857	43.2986	0.0003902	successful ranked
1586	Oxycodone	LC-ESI-QTOF	positive	315.147	C18H21NO4	3	5	5	5	3	0	1.33333	0	0	0	0	0	0	11.3157	0.0002502	successful ranked
1587	Oxycodone	LC-ESI-QTOF	positive	315.147	C18H21NO4	4	4	5	12	10	2	1.08889	0	1	0.2	0	1	0	20.0136	0.0004791	successful ranked
1588	Oxycodone	LC-ESI-QTOF	positive	315.147	C18H21NO4	2	2	5	50	30	11	1.11034	0	1	0.366667	1	0	0.0183908	4.27745	0.0008846	successful ranked
1589	Oxycodone	LC-ESI-QTOF	positive	315.147	C18H21NO4	2	2	5	154	30	15	1.21149	0	1	0.5	0	1	0.0183908	2.30379	0.0010016	successful ranked
1590	Oxycodone	LC-ESI-QTOF	positive	315.147	C18H21NO4	1	1	5	217	30	17	1.25977	0	1	0.566667	1	1	0.117241	1.80091	0.000921	successful ranked
1591	Cimetidine	LC-ESI-qTof	positive	252.116	C10H16N6S	1	1	4	443	30	9	1.14167	0	1	0.5625	1	1	0.05	1.67463	0.000805	successful ranked
1592	Ritonavir	LC-ESI-qTof	positive	720.313	C37H48N6O5S2	4	4	6	400	30	5	1.06207	1	1	0.166667	0	1	0.0183908	3.73248	0.0009956	successful ranked
1593	Nitazoxanide	LC-ESI-qTof	positive	307.026	C12H9N3O5S	2	2	7	48	30	9	1.10526	1	1	0.45	1	0	0.0315789	9.196	0.0012672	successful ranked
1594	Albendazole	LC-ESI-QTOF	positive	265.088	C12H15N3O2S	2	2	4	13	11	2	1.10909	1	1	0.181818	0	1	0.0727273	31.0242	0.0003564	successful ranked
1595	Albendazole	LC-ESI-QTOF	positive	265.088	C12H15N3O2S	1	1	4	15	16	7	1.2	1	1	0.4375	1	1	0.158333	12.9059	0.0004569	successful ranked
1596	Albendazole	LC-ESI-QTOF	positive	265.088	C12H15N3O2S	1	1	4	25	26	12	1.12923	1	1	0.461538	1	1	0.107692	9.33695	0.0005658	successful ranked
1597	Mephenytoin	LC-ESI-qTof	positive	218.106	C12H14N2O2	2	2	4	170	31	5	1.27273	0	1	0.454545	0	1	0.127273	2.39563	0.0006707	successful ranked
1598	Cefdinir	LC-ESI-qTof	positive	395.036	C14H13N5O5S2	4	4	4	1000	30	9	1.04828	1	1	0.3	0	1	0.0091954	0.711823	0.0007707	successful ranked
1599	Nortriptyline	LC-ESI-QTOF	positive	263.167	C19H21N	2	2	3	45	30	21	1.54023	0	1	0.7	0	1	0.0689655	5.79018	0.0007034	successful ranked
1600	Zafirlukast	LC-ESI-qTof	positive	575.209	C31H33N3O6S	1	1	5	182	30	9	1.05231	1	1	0.346154	1	1	0.00923077	3.90937	0.0009243	successful ranked
1601	Zafirlukast	LC-ESI-qTof	positive	575.209	C31H33N3O6S	1	1	5	182	30	9	1.05231	1	1	0.346154	1	1	0.00923077	3.90937	0.0008419	successful ranked
1602	Zafirlukast	LC-ESI-qTof	positive	575.209	C31H33N3O6S	4	4	5	530	30	7	1.22333	1	1	0.28	0	1	0.0333333	9.97837	0.0010122	successful ranked
1603	Zafirlukast	LC-ESI-qTof	positive	575.209	C31H33N3O6S	4	4	5	530	30	7	1.22333	1	1	0.28	0	1	0.0333333	9.97837	0.000994	successful ranked
1604	Propylthiouracil	LC-ESI-qTof	positive	170.051	C7H10N2OS	1	1	1	68	31	-1	0.999999	-1	-1	-1	-1	-1	-1	3.98685	-1	Single candidate matches with the answer.
1605	Propylthiouracil	LC-ESI-QTOF	positive	170.051	C7H10N2OS	1	1	1	4	2	-1	0.999999	-1	-1	-1	-1	-1	-1	0	-1	Single candidate matches with the answer.
1606	Propylthiouracil	LC-ESI-QTOF	positive	170.051	C7H10N2OS	1	1	1	6	5	-1	0.999999	-1	-1	-1	-1	-1	-1	10.0072	-1	Single candidate matches with the answer.
1607	Propylthiouracil	LC-ESI-QTOF	positive	170.051	C7H10N2OS	1	1	1	3	3	-1	0.999999	-1	-1	-1	-1	-1	-1	3.54173	-1	Single candidate matches with the answer.
1608	Methoxsalen	LC-ESI-qTof	positive	216.042	C12H8O4	1	1	6	462	30	10	1.13768	0	1	0.416667	0	1	0.0108696	0.412237	0.0010563	successful ranked
1609	Methoxsalen	LC-ESI-qTof	positive	216.042	C12H8O4	4	4	6	62	31	6	1.07905	0	1	0.26087	0	0	0.00395257	3.37788	0.001021	successful ranked
1610	Methoxsalen	LC-ESI-qTof	positive	216.042	C12H8O4	1	1	6	339	30	12	1.21014	0	1	0.5	1	1	0.0869565	0.69627	0.0010316	successful ranked
1611	Methoxsalen	LC-ESI-QTOF	positive	216.042	C12H8O4	3	3	6	16	11	3	1.14545	0	1	0.272727	0	0	0.0181818	5.2632	0.0005429	successful ranked
1612	Methoxsalen	LC-ESI-QTOF	positive	216.042	C12H8O4	3	3	6	35	20	5	1.09474	0	1	0.25	0	1	0.0368421	3.93097	0.0008472	successful ranked
1613	Methoxsalen	LC-ESI-QTOF	positive	216.042	C12H8O4	3	3	6	40	25	7	1.1	0	1	0.28	0	0	0.0166667	3.66922	0.0008937	successful ranked
1614	Methoxsalen	LC-ESI-QTOF	positive	216.042	C12H8O4	3	3	6	16	15	8	1.19048	0	1	0.533333	0	1	0.0190476	6.28548	0.0007097	successful ranked
1615	Methoxsalen	LC-ESI-QTOF	positive	216.042	C12H8O4	1	1	6	32	30	14	1.1601	0	1	0.482759	1	0	0.0517241	4.96021	0.0010182	successful ranked
1616	Methoxsalen	LC-ESI-QTOF	positive	216.042	C12H8O4	1	1	6	16	17	12	1.33824	0	1	0.705882	1	1	0.198529	8.13301	0.000792	successful ranked
1617	Piroxicam	LC-ESI-qTof	positive	331.063	C15H13N3O4S	1	1	5	79	30	8	1.17582	0	1	0.571429	1	1	0.10989	6.95743	0.0008143	successful ranked
1618	Piroxicam	LC-ESI-qTof	positive	331.063	C15H13N3O4S	1	1	5	1000	28	16	1.09402	1	1	0.592593	1	1	0.037037	1.22747	0.0008951	successful ranked
1619	Methotrexate	LC-ESI-qTof	positive	454.171	C20H22N8O5	1	1	9	342	30	20	1.32759	1	1	0.689655	1	1	0.157635	7.73984	0.0014577	successful ranked
1620	Carbamazepine	LC-ESI-qTof	positive	236.095	C15H12N2O	1	1	3	671	21	10	1.25731	0	1	0.526316	1	1	0.146199	0.363025	0.0004425	successful ranked
1621	Carbamazepine	LC-ESI-qTof	positive	236.095	C15H12N2O	1	1	3	161	31	10	1.17391	0	1	0.434783	1	1	0.0671937	1.87167	0.000564	successful ranked
1622	Carbamazepine	LC-ESI-qTof	positive	236.095	C15H12N2O	1	1	3	1000	19	10	1.26316	0	1	0.526316	1	0	0.0526316	0.327404	0.0004292	successful ranked
1623	Carbamazepine	LC-ESI-QTOF	positive	236.095	C15H12N2O	1	3	3	6	4	2	1.5	0	0	0.5	1	0	0	20.5145	0.0002424	successful ranked
1624	Carbamazepine	LC-ESI-QTOF	positive	236.095	C15H12N2O	2	3	3	8	7	4	1.42857	0	0	0.571429	0	1	0.047619	9.82614	0.0002525	successful ranked
1625	Carbamazepine	LC-ESI-QTOF	positive	236.095	C15H12N2O	2	2	3	7	8	4	1.5	0	1	0.5	0	1	0.178571	15.9494	0.0003337	successful ranked
1626	Carbamazepine	LC-ESI-QTOF	positive	236.095	C15H12N2O	1	1	3	19	20	13	1.41053	0	1	0.65	1	1	0.131579	11.6699	0.000452	successful ranked
1627	Carbamazepine	LC-ESI-QTOF	positive	236.095	C15H12N2O	1	1	3	25	26	18	1.38769	0	1	0.692308	1	1	0.0584615	9.21789	0.0005405	successful ranked
1628	Cephalexin	LC-ESI-QTOF	positive	347.094	C16H17N3O4S	1	1	7	28	29	18	1.23545	1	1	0.642857	1	1	0.174603	14.8187	0.0012244	successful ranked
1629	Atropine	LC-ESI-qTof	positive	289.168	C17H23NO3	1	1	4	1000	23	12	1.23684	0	1	0.6	1	1	0.0526316	0.631522	0.0006221	successful ranked
1630	Fenoprofen	LC-ESI-qTof	positive	242.094	C15H14O3	1	1	5	117	8	4	1.35714	0	1	0.5	1	1	0.178571	3.49428	0.0004362	successful ranked
1631	Fenoprofen	LC-ESI-qTof	positive	242.094	C15H14O3	1	1	5	117	8	4	1.35714	0	1	0.5	1	1	0.178571	3.49428	0.0004294	successful ranked
1632	Fenoprofen	LC-ESI-qTof	positive	242.094	C15H14O3	1	1	5	117	8	4	1.35714	0	1	0.5	1	1	0.178571	3.49428	0.0004039	successful ranked
1633	Sulfamethizole	LC-ESI-qTof	positive	270.025	C9H10N4O2S2	1	1	4	209	31	9	1.19231	0	1	0.692308	1	1	0.141026	3.28073	0.0006472	successful ranked
1634	Sulfamethizole	LC-ESI-QTOF	positive	270.025	C9H10N4O2S2	1	1	4	20	20	15	1.28421	1	1	0.75	1	1	0.105263	21.5991	0.0006009	successful ranked
1635	Bisoprolol	LC-ESI-QTOF	positive	325.225	C18H31NO4	1	1	2	4	4	3	2	0	1	0.75	1	1	0.5	36.3953	0.0001557	successful ranked
1636	Bisoprolol	LC-ESI-QTOF	positive	325.225	C18H31NO4	1	1	2	17	17	16	1.625	0	1	0.941176	1	1	0.477941	25.0858	0.0002846	successful ranked
1637	Bisoprolol	LC-ESI-QTOF	positive	325.225	C18H31NO4	1	1	2	30	30	29	1.53333	0	1	0.966667	1	1	0.402299	29.534	0.0004582	successful ranked
1638	Imatinib	LC-ESI-qTof	positive	493.259	C29H31N7O	1	1	7	276	30	11	1.10591	1	1	0.37931	0	1	0.0221675	2.15159	0.0012355	successful ranked
1639	Prednisone	LC-ESI-qTof	positive	358.178	C21H26O5	1	1	6	369	30	24	1.65517	0	1	0.8	1	1	0.517241	1.15589	0.001152	successful ranked
1640	Prednisone	LC-ESI-qTof	positive	358.178	C21H26O5	1	1	6	783	30	23	1.58621	0	1	0.766667	1	1	0.43908	0.634324	0.0011913	successful ranked
1641	Prednisone	LC-ESI-qTof	positive	358.178	C21H26O5	1	1	6	1094	30	21	1.45747	0	1	0.7	1	1	0.321839	0.743725	0.0011019	successful ranked
1642	Prednisone	LC-ESI-QTOF	positive	358.178	C21H26O5	1	1	6	43	30	17	1.26667	0	1	0.566667	1	1	0.149425	5.83876	0.000956	successful ranked
1643	Prednisone	LC-ESI-QTOF	positive	358.178	C21H26O5	1	1	6	129	30	23	1.57241	0	1	0.766667	1	1	0.432184	2.49823	0.0010506	successful ranked
1644	Prednisone	LC-ESI-QTOF	positive	358.178	C21H26O5	1	1	6	147	30	22	1.52414	0	1	0.733333	1	1	0.36092	2.37164	0.0009937	successful ranked
1645	Prednisone	LC-ESI-QTOF	positive	358.178	C21H26O5	1	1	6	156	30	27	1.8023	0	1	0.9	1	1	0.662069	5.1598	0.0010265	successful ranked
1646	Prednisone	LC-ESI-QTOF	positive	358.178	C21H26O5	1	1	6	138	30	26	1.69655	0	1	0.866667	1	1	0.570115	7.16933	0.0010544	successful ranked
1647	Mebendazole	LC-ESI-QTOF	positive	295.096	C16H13N3O3	1	6	7	3	2	1	2	0	0	0.5	1	0	0	0	0.0003247	successful ranked
1648	Mebendazole	LC-ESI-QTOF	positive	295.096	C16H13N3O3	4	6	7	5	4	1	1.33333	0	0	0.25	0	0	0	16.7531	0.0004158	successful ranked
1649	Mebendazole	LC-ESI-QTOF	positive	295.096	C16H13N3O3	1	3	7	5	5	2	1.3	0	0	0.4	1	0	0	36.3574	0.0004857	successful ranked
1650	Mebendazole	LC-ESI-QTOF	positive	295.096	C16H13N3O3	3	5	7	6	7	2	1.28571	1	0	0.285714	0	1	0.0952381	18.9599	0.0005718	successful ranked
1651	Mebendazole	LC-ESI-QTOF	positive	295.096	C16H13N3O3	1	1	7	9	10	7	1.37778	0	1	0.7	1	1	0.177778	18.6095	0.0007175	successful ranked
1652	Mebendazole	LC-ESI-QTOF	positive	295.096	C16H13N3O3	2	2	7	7	6	3	1.33333	0	0	0.5	1	0	0	39.5397	0.0005467	successful ranked
1653	Dyphylline	LC-ESI-qTof	positive	254.102	C10H14N4O4	1	1	4	163	37	6	1.13333	1	1	0.375	1	1	0.075	1.61828	0.0007913	successful ranked
1654	Dyphylline	LC-ESI-qTof	positive	254.102	C10H14N4O4	2	2	4	132	31	2	1.02857	1	1	0.133333	0	1	0.00952381	2.86938	0.0007045	successful ranked
1655	Latanoprost	LC-ESI-qTof	positive	432.288	C26H40O5	1	1	7	595	30	24	1.62299	0	1	0.8	1	1	0.108046	1.26566	0.0013456	successful ranked
1656	Mecamylamine	LC-ESI-QTOF	positive	167.167	C11H21N	1	1	1	6	6	-1	0.999998	-1	-1	-1	-1	-1	-1	16.0544	-1	Single candidate matches with the answer.
1657	Acamprosate	LC-ESI-QTOF	positive	181.041	C5H11NO4S	1	1	4	5	5	2	1.3	0	1	0.4	1	1	0.2	17.2905	0.0002807	successful ranked
1658	Acamprosate	LC-ESI-QTOF	positive	181.041	C5H11NO4S	1	2	4	4	5	2	1.3	0	0	0.4	1	0	0	18.8753	0.0002824	successful ranked
1659	Cefixime	LC-ESI-qTof	positive	453.041	C16H15N5O7S2	3	3	4	1000	30	9	1.11264	1	1	0.3	0	1	0.016092	1.37585	0.0007701	successful ranked
1660	Thioridazine	LC-ESI-QTOF	positive	370.154	C21H26N2S2	1	1	7	4	4	3	1.83333	0	1	0.75	1	0	0.166667	64.1399	0.0004961	successful ranked
1661	Thioridazine	LC-ESI-QTOF	positive	370.154	C21H26N2S2	4	5	7	11	11	5	1.45455	0	0	0.454545	0	1	0.127273	26.9845	0.0006669	successful ranked
1662	Thioridazine	LC-ESI-QTOF	positive	370.154	C21H26N2S2	1	1	7	17	18	16	1.69281	0	1	0.888889	1	1	0.346405	27.5767	0.0009121	successful ranked
1663	Thioridazine	LC-ESI-QTOF	positive	370.154	C21H26N2S2	1	1	7	20	21	18	1.58947	0	1	0.9	1	1	0.205263	28.393	0.0010154	successful ranked
1664	Amprenavir	LC-ESI-qTof	positive	505.225	C25H35N3O6S	1	1	6	1000	30	23	1.34023	1	1	0.766667	1	1	0.163218	0.957941	0.0010879	successful ranked
1665	Methazolamide	LC-ESI-qTof	positive	236.004	C5H8N4O3S2	1	3	3	136	5	1	1.1	1	0	0.2	1	0	0	2.14607	0.000225	successful ranked
1666	Sufentanil	LC-ESI-QTOF	positive	386.203	C22H30N2O2S	2	3	7	3	3	1	2	0	0	0.333333	0	1	0.666667	60.4971	0.0003488	successful ranked
1667	Sufentanil	LC-ESI-QTOF	positive	386.203	C22H30N2O2S	1	1	7	7	7	5	1.61905	0	1	0.714286	1	1	0.380952	39.3376	0.0004889	successful ranked
1668	Sufentanil	LC-ESI-QTOF	positive	386.203	C22H30N2O2S	1	1	7	26	27	23	1.67077	0	1	0.884615	1	1	0.227692	18.1022	0.0011948	successful ranked
1669	Sufentanil	LC-ESI-QTOF	positive	386.203	C22H30N2O2S	1	1	7	25	26	24	1.69231	0	1	0.923077	1	1	0.178462	29.3029	0.001378	successful ranked
1670	Sufentanil	LC-ESI-QTOF	positive	386.203	C22H30N2O2S	1	1	7	20	21	19	1.64737	0	1	0.95	1	1	0.0368421	54.5469	0.0010924	successful ranked
1671	Apomorphine	LC-ESI-QTOF	positive	267.126	C17H17NO2	3	7	7	15	7	0	1.04762	0	0	0	0	0	0	8.51926	0.0003956	successful ranked
1672	Apomorphine	LC-ESI-QTOF	positive	267.126	C17H17NO2	3	7	7	22	9	0	1.02778	0	0	0	0	0	0	6.75684	0.0003962	successful ranked
1673	Apomorphine	LC-ESI-QTOF	positive	267.126	C17H17NO2	2	5	7	27	16	2	1.09167	0	0	0.125	0	1	0.0666667	5.82688	0.0008578	successful ranked
1674	Norethindrone	LC-ESI-qTof	positive	298.193	C20H26O2	1	1	5	379	30	21	1.41872	0	1	0.724138	1	1	0.108374	0.967618	0.0009617	successful ranked
1675	Norethindrone	LC-ESI-qTof	positive	298.193	C20H26O2	3	5	5	1000	30	1	1.03218	0	0	0.0333333	0	0	0.0114943	0.425268	0.0007558	successful ranked
1676	Adefovir Dipivoxil	LC-ESI-qTof	positive	501.199	C20H32N5O8P	1	1	10	342	30	8	1.0471	1	1	0.333333	1	0	0.0108696	1.69238	0.0016705	successful ranked
1677	Thiabendazole	LC-ESI-QTOF	negative	201.036	C10H7N3S	1	3	4	4	4	1	1.16667	0	0	0.25	1	0	0	16.531	0.0002323	successful ranked
1678	Thiabendazole	LC-ESI-QTOF	positive	201.036	C10H7N3S	1	1	4	12	11	7	1.47273	0	1	0.636364	1	1	0.454545	12.9874	0.0003688	successful ranked
1679	Thiabendazole	LC-ESI-QTOF	positive	201.036	C10H7N3S	1	1	4	16	15	10	1.37143	0	1	0.666667	1	1	0.342857	7.3132	0.0004204	successful ranked
1680	Thiabendazole	LC-ESI-QTOF	positive	201.036	C10H7N3S	1	1	4	17	17	13	1.44853	0	1	0.764706	1	1	0.441176	6.70103	0.0004537	successful ranked
1681	Thiabendazole	LC-ESI-QTOF	positive	201.036	C10H7N3S	2	4	4	6	5	0	1.33333	0	0	0	0	1	0.333333	8.60392	0.0002649	successful ranked
1682	Thiabendazole	LC-ESI-QTOF	positive	201.036	C10H7N3S	1	1	4	7	7	6	2	0	1	0.857143	1	1	0.952381	8.60871	0.0002853	successful ranked
1683	Pralidoxime	LC-ESI-QTOF	positive	137.071	C7H9N2O	1	1	2	5	5	0	0.999999	-1	0	-1	-1	-1	-1	11.6676	0.0001322	No mother-daughter relation is found for all the precursor formula.
1684	Pralidoxime	LC-ESI-QTOF	positive	137.071	C7H9N2O	1	1	2	12	12	10	1.68182	0	1	0.833333	1	1	0.378788	6.23064	0.0002497	successful ranked
1685	Pentamidine	LC-ESI-QTOF	positive	340.19	C19H24N4O2	1	4	6	4	2	1	2	0	0	0.5	1	0	0	0	0.000271	successful ranked
1686	Pentamidine	LC-ESI-QTOF	positive	340.19	C19H24N4O2	1	4	6	7	5	2	1.3	0	0	0.4	1	0	0	90.9523	0.0004356	successful ranked
1687	Pentamidine	LC-ESI-QTOF	positive	340.19	C19H24N4O2	1	1	6	13	12	7	1.49091	1	1	0.636364	1	0	0.0545455	29.2957	0.0005895	successful ranked
1688	Pentamidine	LC-ESI-QTOF	positive	340.19	C19H24N4O2	1	1	6	15	16	11	1.44762	0	1	0.733333	1	0	0.0285714	29.8528	0.0007594	successful ranked
1689	Pentamidine	LC-ESI-QTOF	positive	340.19	C19H24N4O2	3	3	6	14	15	11	1.43956	0	1	0.785714	0	1	0.010989	46.6746	0.0006919	successful ranked
1690	Deferoxamine	LC-ESI-qTof	positive	560.353	C25H48N6O8	2	2	3	554	30	10	1.14483	1	1	0.333333	0	1	0.0689655	2.10432	0.0005323	successful ranked
1691	Etodolac	LC-ESI-qTof	positive	287.152	C17H21NO3	1	1	3	1679	30	20	1.48677	0	1	0.714286	1	1	0.407407	0.188048	0.000607	successful ranked
1692	Etodolac	LC-ESI-QTOF	positive	287.152	C17H21NO3	2	2	3	5	5	2	2	0	1	0.4	0	1	0.7	18.229	0.0002621	successful ranked
1693	Etodolac	LC-ESI-QTOF	positive	287.152	C17H21NO3	1	1	3	15	15	9	1.31429	0	1	0.6	1	1	0.0857143	8.01291	0.0003882	successful ranked
1694	Etodolac	LC-ESI-QTOF	positive	287.152	C17H21NO3	1	1	3	31	30	22	1.3977	0	1	0.733333	1	1	0.312644	12.7872	0.0006195	successful ranked
1695	Etodolac	LC-ESI-QTOF	positive	287.152	C17H21NO3	1	1	3	36	30	19	1.3399	0	1	0.655172	1	1	0.302956	13.5544	0.0006093	successful ranked
1696	Etodolac	LC-ESI-QTOF	positive	287.152	C17H21NO3	1	1	3	48	30	22	1.48966	0	1	0.733333	1	1	0.397701	10.8585	0.0005807	successful ranked
1697	Prilocaine	LC-ESI-qTof	positive	220.158	C13H20N2O	1	1	3	241	30	8	1.25641	0	1	0.615385	1	1	0.166667	1.02773	0.0005192	successful ranked
1698	Prilocaine	LC-ESI-qTof	positive	220.158	C13H20N2O	1	1	3	193	30	9	1.20261	0	1	0.5	1	1	0.143791	1.27263	0.0005246	successful ranked
1699	Prilocaine	LC-ESI-qTof	positive	220.158	C13H20N2O	1	1	3	141	32	7	1.08187	0	1	0.368421	1	1	0.0116959	2.20917	0.000524	successful ranked
1700	Ethotoin	LC-ESI-qTof	positive	204.09	C11H12N2O2	1	1	1	23	20	-1	0.999999	-1	-1	-1	-1	-1	-1	10.7459	-1	Single candidate matches with the answer.
1701	Irinotecan	LC-ESI-qTof	positive	586.279	C33H38N4O6	1	1	7	392	30	10	1.2	1	1	0.47619	1	1	0.114286	4.75364	0.0011868	successful ranked
1702	Methimazole	LC-ESI-QTOF	positive	114.025	C4H6N2S	1	1	1	14	12	-1	0.999999	-1	-1	-1	-1	-1	-1	4.72811	-1	Single candidate matches with the answer.
1703	Methimazole	LC-ESI-QTOF	positive	114.025	C4H6N2S	1	1	1	3	1	-1	1.7347	-1	-1	-1	-1	-1	-1	0	-1	Single candidate matches with the answer.
1704	Olopatadine	LC-ESI-QTOF	positive	337.168	C21H23NO3	1	1	6	3	1	0	0.999998	-1	0	-1	-1	-1	-1	0	0	No mother-daughter relation is found for all the precursor formula.
1705	Olopatadine	LC-ESI-QTOF	positive	337.168	C21H23NO3	4	5	6	10	8	2	1.17857	0	0	0.25	0	1	0.0357143	30.4523	0.0005477	successful ranked
1706	Olopatadine	LC-ESI-QTOF	positive	337.168	C21H23NO3	3	3	6	66	30	15	1.24828	0	1	0.5	0	1	0.0597701	6.21787	0.0011423	successful ranked
1707	Olopatadine	LC-ESI-QTOF	positive	337.168	C21H23NO3	1	1	6	106	30	21	1.37471	0	1	0.7	1	1	0.174713	4.67239	0.0012338	successful ranked
1708	Olopatadine	LC-ESI-QTOF	positive	337.168	C21H23NO3	1	1	6	117	30	24	1.49195	0	1	0.8	1	1	0.287356	4.49859	0.0011537	successful ranked
1709	Etoposide	LC-ESI-qTof	positive	588.184	C29H32O13	1	1	12	254	29	16	1.24074	0	1	0.571429	0	1	0.0343915	6.86445	0.0021236	successful ranked
1710	Etoposide	LC-ESI-QTOF	positive	588.184	C29H32O13	1	1	12	13	11	6	1.32727	0	1	0.545455	1	0	0.163636	57.6187	0.0010915	successful ranked
1711	Etoposide	LC-ESI-QTOF	positive	588.184	C29H32O13	1	1	12	9	10	5	1.33333	0	1	0.5	0	0	0.0888889	59.8337	0.0010435	successful ranked
1712	Etoposide	LC-ESI-QTOF	positive	588.184	C29H32O13	1	1	12	12	13	8	1.4359	0	1	0.615385	0	1	0.0641026	59.235	0.0011866	successful ranked
1713	Etoposide	LC-ESI-QTOF	positive	588.184	C29H32O13	1	2	12	10	11	8	1.58182	0	0	0.727273	1	0	0	87.3669	0.0010441	successful ranked
1714	Etoposide	LC-ESI-QTOF	positive	588.184	C29H32O13	1	2	12	11	12	9	1.56061	0	0	0.75	1	0	0	93.6987	0.001078	successful ranked
1715	Oxcarbazepine	LC-ESI-qTof	positive	252.09	C15H12N2O2	1	1	6	601	30	15	1.23647	0	1	0.555556	1	1	0.0968661	0.607514	0.0010659	successful ranked
1716	Oxcarbazepine	LC-ESI-qTof	positive	252.09	C15H12N2O2	1	1	6	121	31	12	1.24275	0	1	0.5	1	1	0.0615942	2.41555	0.0010857	successful ranked
1717	Oxcarbazepine	LC-ESI-qTof	positive	252.09	C15H12N2O2	1	1	6	784	30	11	1.13054	0	1	0.37931	1	1	0.0517241	0.633733	0.0009841	successful ranked
1718	Roxithromycin	LC-ESI-qTof	positive	836.525	C41H76N2O15	1	1	4	1000	30	23	1.2849	0	1	0.851852	0	1	0.011396	4.02276	0.0009594	successful ranked
1719	Nalidixic Acid	LC-ESI-qTof	positive	232.085	C12H12N2O3	1	1	5	91	31	7	1.15833	0	1	0.4375	1	1	0.0916667	2.57002	0.0008172	successful ranked
1720	Nalidixic Acid	LC-ESI-qTof	positive	232.085	C12H12N2O3	1	1	5	80	30	8	1.18382	0	1	0.470588	1	1	0.0661765	2.52987	0.0008698	successful ranked
1721	Phenelzine	LC-ESI-qTof	positive	136.1	C8H12N2	1	1	1	55	12	-1	0.999999	-1	-1	-1	-1	-1	-1	6.11242	-1	Single candidate matches with the answer.
1722	Mefenamic acid	LC-ESI-qTof	positive	241.11	C15H15NO2	1	1	5	135	31	13	1.14253	0	1	0.433333	0	1	0.0275862	3.11365	0.0012069	successful ranked
1723	Mefenamic acid	LC-ESI-QTOF	positive	241.11	C15H15NO2	1	1	5	4	3	0	0.999999	-1	0	-1	-1	-1	-1	7.68236	0.0002202	No mother-daughter relation is found for all the precursor formula.
1724	Mefenamic acid	LC-ESI-QTOF	positive	241.11	C15H15NO2	4	5	5	4	5	0	1.1	0	0	0	0	0	0	8.46518	0.0003114	successful ranked
1725	Mefenamic acid	LC-ESI-QTOF	positive	241.11	C15H15NO2	2	5	5	9	10	0	1.02222	0	0	0	0	1	0.0222222	9.62225	0.0003835	successful ranked
1726	Mefenamic acid	LC-ESI-QTOF	positive	241.11	C15H15NO2	4	5	5	9	10	0	1.06667	0	0	0	0	1	0.0444444	9.54907	0.000457	successful ranked
1727	Mefenamic acid	LC-ESI-QTOF	positive	241.11	C15H15NO2	3	5	5	6	7	0	1.09524	0	0	0	0	1	0.047619	15.5004	0.0003775	successful ranked
1728	Mefenamic acid	LC-ESI-QTOF	positive	241.11	C15H15NO2	1	1	5	10	11	10	1.87273	0	1	0.909091	1	1	0.163636	6.84921	0.0005761	successful ranked
1729	Mefenamic acid	LC-ESI-QTOF	positive	241.11	C15H15NO2	4	4	5	17	18	5	1.37255	0	1	0.277778	0	1	0.163399	5.95359	0.0007389	successful ranked
1730	Mefenamic acid	LC-ESI-QTOF	positive	241.11	C15H15NO2	1	1	5	25	26	24	1.77538	0	1	0.923077	1	1	0.28	10.7228	0.0010054	successful ranked
1731	Aciclovir	LC-ESI-qTof	positive	225.086	C8H11N5O3	1	1	2	1000	30	18	1.27899	1	1	0.75	1	1	0.224638	0.402185	0.0004885	successful ranked
1732	Tripelennamine	LC-ESI-QTOF	positive	255.174	C16H21N3	1	2	3	4	5	3	1.6	0	0	0.6	1	0	0	37.8138	0.0002214	successful ranked
1733	Tripelennamine	LC-ESI-QTOF	positive	255.174	C16H21N3	1	1	3	6	7	6	1.7619	0	1	0.857143	1	0	0.0952381	33.8038	0.0003461	successful ranked
1734	Tripelennamine	LC-ESI-QTOF	positive	255.174	C16H21N3	1	2	3	8	9	7	1.67857	0	0	0.875	1	0	0	45.9155	0.0003798	successful ranked
1735	Tripelennamine	LC-ESI-QTOF	positive	255.174	C16H21N3	2	2	3	9	10	8	1.55556	0	1	0.8	0	1	0.0666667	43.6534	0.0003261	successful ranked
1736	Primidone	LC-ESI-qTof	positive	218.106	C12H14N2O2	1	1	4	179	30	9	1.27941	0	1	0.529412	1	1	0.0955882	1.6065	0.0007562	successful ranked
1737	Primidone	LC-ESI-qTof	positive	218.106	C12H14N2O2	1	1	4	119	30	15	1.21	0	1	0.6	1	1	0.0433333	2.94715	0.0007613	successful ranked
1738	Primidone	LC-ESI-qTof	positive	218.106	C12H14N2O2	3	3	4	150	31	9	1.12253	0	1	0.391304	0	1	0	2.53502	0.0007178	successful ranked
1739	Primidone	LC-ESI-QTOF	positive	218.106	C12H14N2O2	1	1	4	21	21	15	1.41053	0	1	0.75	1	1	0.184211	11.1209	0.0007054	successful ranked
1740	Candesartan	LC-ESI-QTOF	negative	440.16	C24H20N6O3	1	1	10	7	7	4	1.33333	1	1	0.571429	1	1	0.047619	44.1719	0.000646	successful ranked
1741	Candesartan	LC-ESI-QTOF	negative	440.16	C24H20N6O3	5	10	10	6	7	0	1.7619	1	0	0	0	1	0.619048	53.8123	0.0006257	successful ranked
1742	Candesartan	LC-ESI-QTOF	negative	440.16	C24H20N6O3	4	4	10	4	5	2	1.3	1	1	0.4	1	0	0	73.1039	0.0005311	successful ranked
1743	Candesartan	LC-ESI-QTOF	negative	440.16	C24H20N6O3	6	10	10	3	4	0	2	1	0	0	0	1	0.833333	90.7509	0.0004862	successful ranked
1744	Candesartan	LC-ESI-QTOF	positive	440.16	C24H20N6O3	1	1	10	14	12	7	1.21212	0	1	0.583333	1	1	0.030303	41.8007	0.000945	successful ranked
1745	Candesartan	LC-ESI-QTOF	positive	440.16	C24H20N6O3	3	3	10	34	30	14	1.13563	1	1	0.466667	1	0	0.0045977	13.9177	0.001606	successful ranked
1746	Candesartan	LC-ESI-QTOF	positive	440.16	C24H20N6O3	1	1	10	52	30	19	1.22759	1	1	0.633333	1	1	0.0298851	9.12171	0.0016127	successful ranked
1747	Candesartan	LC-ESI-QTOF	positive	440.16	C24H20N6O3	1	1	10	57	30	23	1.37241	1	1	0.766667	1	1	0.0045977	13.3682	0.001654	successful ranked
1748	Candesartan	LC-ESI-QTOF	positive	440.16	C24H20N6O3	1	1	10	59	30	20	1.22989	1	1	0.666667	1	1	0.0551724	14.6455	0.0016155	successful ranked
1749	Tazarotene	LC-ESI-qTof	positive	351.129	C21H21NO2S	6	6	11	147	31	6	1.10333	0	1	0.24	0	1	0.00666667	6.56297	0.0018848	successful ranked
1750	Alfentanil	LC-ESI-QTOF	positive	416.254	C21H32N6O3	1	1	4	3	3	0	0.999996	-1	0	-1	-1	-1	-1	60.1285	0.0001635	No mother-daughter relation is found for all the precursor formula.
1751	Alfentanil	LC-ESI-QTOF	positive	416.254	C21H32N6O3	2	2	4	11	11	4	1.14545	1	1	0.363636	1	0	0.0181818	13.7394	0.0004004	successful ranked
1752	Alfentanil	LC-ESI-QTOF	positive	416.254	C21H32N6O3	2	2	4	18	19	10	1.29825	1	1	0.526316	0	1	0.0584795	16.7456	0.0004936	successful ranked
1753	Alfentanil	LC-ESI-QTOF	positive	416.254	C21H32N6O3	2	2	4	33	30	20	1.4245	1	1	0.740741	1	0	0.0940171	20.2026	0.0007991	successful ranked
1754	Alfentanil	LC-ESI-QTOF	positive	416.254	C21H32N6O3	2	2	4	56	30	23	1.60837	1	1	0.793103	0	1	0.142857	29.2292	0.0007785	successful ranked
1755	Dicyclomine	LC-ESI-qTof	positive	309.267	C19H35NO2	1	1	1	166	32	-1	0.999997	-1	-1	-1	-1	-1	-1	2.55896	-1	Single candidate matches with the answer.
1756	Pentoxifylline	LC-ESI-qTof	positive	278.138	C13H18N4O3	1	1	2	514	30	14	1.2	1	1	0.666667	1	1	0.171429	1.46168	0.0004376	successful ranked
1757	Tropicamide	LC-ESI-qTof	positive	284.152	C17H20N2O2	2	2	6	1000	30	16	1.35862	0	1	0.533333	0	1	0.158621	0.526305	0.0012695	successful ranked
1758	Phenylbutazone	LC-ESI-QTOF	positive	308.152	C19H20N2O2	5	7	7	6	4	0	1.83333	0	0	0	0	0	0	56.1053	0.0004767	successful ranked
1759	Phenylbutazone	LC-ESI-QTOF	positive	308.152	C19H20N2O2	2	5	7	4	5	1	1.2	0	0	0.2	0	1	0.1	59.2369	0.0004719	successful ranked
1760	Phenylbutazone	LC-ESI-QTOF	positive	308.152	C19H20N2O2	2	2	7	30	28	9	1.30462	0	1	0.346154	0	1	0.181538	12.1968	0.0012208	successful ranked
1761	Phenylbutazone	LC-ESI-QTOF	positive	308.152	C19H20N2O2	5	5	7	63	30	10	1.20635	0	1	0.357143	0	0	0.042328	3.50957	0.001363	successful ranked
1762	Phenylbutazone	LC-ESI-QTOF	positive	308.152	C19H20N2O2	5	5	7	88	30	8	1.29557	0	1	0.275862	0	1	0.130542	2.75593	0.0012009	successful ranked
1763	Fentanyl	LC-ESI-QTOF	positive	336.22	C22H28N2O	1	3	4	4	2	1	2	0	0	0.5	1	0	0	0	0.0002007	successful ranked
1764	Fentanyl	LC-ESI-QTOF	positive	336.22	C22H28N2O	1	3	4	5	3	1	1.33333	0	0	0.333333	1	0	0	104	0.0002195	successful ranked
1765	Fentanyl	LC-ESI-QTOF	positive	336.22	C22H28N2O	2	3	4	6	5	2	1.4	0	0	0.4	0	1	0.1	56.5528	0.0003611	successful ranked
1766	Fentanyl	LC-ESI-QTOF	positive	336.22	C22H28N2O	1	2	4	17	18	11	1.38562	0	0	0.611111	0	1	0	28.9186	0.0005536	successful ranked
1767	Fentanyl	LC-ESI-QTOF	positive	336.22	C22H28N2O	2	2	4	32	31	19	1.33118	0	1	0.612903	0	1	0.0129032	21.5238	0.0008203	successful ranked
1768	Meloxicam	LC-ESI-qTof	positive	351.035	C14H13N3O4S2	1	1	4	187	31	15	1.14855	1	1	0.625	1	1	0.0652174	3.49419	0.000777	successful ranked
1769	Meloxicam	LC-ESI-qTof	positive	351.035	C14H13N3O4S2	1	1	4	880	30	18	1.11264	1	1	0.6	1	1	0.0482759	0.979264	0.0007933	successful ranked
1770	Meloxicam	LC-ESI-qTof	positive	351.035	C14H13N3O4S2	1	1	4	375	30	11	1.1462	1	1	0.578947	1	1	0.0233918	3.78414	0.0008149	successful ranked
1771	Meloxicam	LC-ESI-QTOF	positive	351.035	C14H13N3O4S2	1	2	4	4	3	2	1.66667	0	0	0.666667	1	0	0	115.077	0.0002978	successful ranked
1772	Meloxicam	LC-ESI-QTOF	positive	351.035	C14H13N3O4S2	1	1	4	7	7	5	1.42857	1	1	0.714286	1	1	0.190476	56.9172	0.0004297	successful ranked
1773	Meloxicam	LC-ESI-QTOF	positive	351.035	C14H13N3O4S2	2	2	4	7	8	4	1.17857	1	1	0.5	1	0	0.0357143	49.7189	0.0004513	successful ranked
1774	Meloxicam	LC-ESI-QTOF	positive	351.035	C14H13N3O4S2	1	1	4	5	6	4	1.26667	0	1	0.666667	1	1	0.0666667	54.0686	0.0003844	successful ranked
1775	Meloxicam	LC-ESI-QTOF	positive	351.035	C14H13N3O4S2	1	2	4	5	6	4	1.26667	0	0	0.666667	1	1	0	76.1126	0.0003001	successful ranked
1776	Tadalafil	LC-ESI-qTof	positive	389.138	C22H19N3O4	1	1	8	900	30	17	1.14023	1	1	0.566667	1	0	0.00689655	1.16268	0.0014139	successful ranked
1777	Disulfiram	LC-ESI-qTof	positive	296.051	C10H20N2S4	1	1	11	15	3	2	2	0	1	0.666667	1	1	0.666667	26.5312	0.0005402	successful ranked
1778	Disulfiram	LC-ESI-qTof	positive	296.051	C10H20N2S4	6	6	11	89	32	4	1.14855	0	1	0.166667	0	1	0.0833333	6.46805	0.0019141	successful ranked
1779	Disulfiram	LC-ESI-qTof	positive	296.051	C10H20N2S4	8	11	11	342	30	0	1.13547	0	0	0	0	1	0.0640394	1.18991	0.0016165	successful ranked
1780	Disulfiram	LC-ESI-qTof	positive	296.051	C10H20N2S4	8	11	11	342	30	0	1.13547	0	0	0	0	1	0.0640394	1.18991	0.0016203	successful ranked
1781	Disulfiram	LC-ESI-qTof	positive	296.051	C10H20N2S4	7	7	11	172	31	3	1.30882	0	1	0.176471	0	1	0.154412	5.45999	0.0018448	successful ranked
1782	Cinoxacin	LC-ESI-qTof	positive	262.059	C12H10N2O5	1	1	5	525	30	15	1.11905	0	1	0.535714	1	1	0.0634921	0.915742	0.0008523	successful ranked
1783	Tolazamide	LC-ESI-qTof	positive	311.13	C14H21N3O3S	1	1	5	37	20	3	1.07273	0	1	0.272727	1	0	0.0181818	11.2646	0.0007196	successful ranked
1784	Tolazamide	LC-ESI-qTof	positive	311.13	C14H21N3O3S	1	1	5	422	30	10	1.16176	1	1	0.588235	1	1	0.0514706	3.18839	0.0009415	successful ranked
1785	Dobutamine	LC-ESI-QTOF	positive	301.168	C18H23NO3	1	1	3	9	9	8	1.75	0	1	0.888889	1	1	0.277778	41.8569	0.0003134	successful ranked
1786	Dobutamine	LC-ESI-QTOF	positive	301.168	C18H23NO3	1	1	3	7	8	6	1.57143	0	1	0.75	1	1	0.357143	57.7212	0.0002948	successful ranked
1787	Dobutamine	LC-ESI-QTOF	positive	301.168	C18H23NO3	1	1	3	10	11	9	1.95556	0	1	0.9	1	1	0.488889	49.977	0.000397	successful ranked
1788	Dobutamine	LC-ESI-QTOF	positive	301.168	C18H23NO3	1	1	3	9	10	7	1.75	0	1	0.777778	1	1	0.444444	52.3146	0.0003323	successful ranked
1789	Levamisole	LC-ESI-QTOF	positive	204.072	C11H12N2S	1	1	2	4	2	0	0.999999	-1	0	-1	-1	-1	-1	19.0972	0.000104	No mother-daughter relation is found for all the precursor formula.
1790	Levamisole	LC-ESI-QTOF	positive	204.072	C11H12N2S	1	1	2	8	7	1	1.04762	0	1	0.142857	1	1	0.047619	13.2078	0.0001906	successful ranked
1791	Levamisole	LC-ESI-QTOF	positive	204.072	C11H12N2S	2	2	2	26	25	1	1.00526	0	0	0.05	1	0	0	5.54954	0.0002914	successful ranked
1792	Levamisole	LC-ESI-QTOF	positive	204.072	C11H12N2S	1	1	2	27	27	5	1.03333	0	1	0.2	1	1	0.0166667	5.36134	0.0003948	successful ranked
1793	Levamisole	LC-ESI-QTOF	positive	204.072	C11H12N2S	1	2	2	20	21	9	1.12865	0	0	0.473684	1	0	0	7.37078	0.000368	successful ranked
1794	Levamisole	LC-ESI-QTOF	positive	204.072	C11H12N2S	1	1	2	3	1	0	0.99622	-1	0	-1	-1	-1	-1	0	0	No mother-daughter relation is found for all the precursor formula.
1795	Levamisole	LC-ESI-QTOF	positive	204.072	C11H12N2S	1	2	2	6	4	2	1.5	0	0	0.5	1	0	0	16.4312	0.0001942	successful ranked
1796	Levamisole	LC-ESI-QTOF	positive	204.072	C11H12N2S	1	1	2	26	24	20	1.46739	0	1	0.833333	1	1	0.112319	6.70162	0.0004279	successful ranked
1797	Levamisole	LC-ESI-QTOF	positive	204.072	C11H12N2S	1	1	2	38	30	25	1.4	0	1	0.833333	1	1	0.110345	4.87078	0.0004767	successful ranked
1798	Levamisole	LC-ESI-QTOF	positive	204.072	C11H12N2S	1	1	2	38	30	24	1.44138	0	1	0.8	1	1	0.211494	5.63685	0.0005197	successful ranked
1799	Prednisolone	LC-ESI-qTof	positive	360.194	C21H28O5	1	1	7	611	30	25	1.73103	0	1	0.833333	1	1	0.241379	0.871671	0.0012794	successful ranked
1800	Benzonatate	LC-ESI-qTof	positive	603.362	C30H53NO11	1	1	7	1000	30	18	1.31624	0	1	0.666667	1	0	0.0512821	1.14103	0.0012052	successful ranked
1801	Suprofen	LC-ESI-qTof	positive	260.051	C14H12O3S	1	1	9	522	33	9	1.11067	0	1	0.391304	0	1	0.00790514	0.629338	0.0015994	successful ranked
1802	Terbutaline	LC-ESI-QTOF	positive	225.136	C12H19NO3	1	1	2	6	5	4	1.9	0	1	0.8	1	1	0.6	14.8386	0.000182	successful ranked
1803	Terbutaline	LC-ESI-QTOF	positive	225.136	C12H19NO3	1	1	2	6	6	4	1.6	0	1	0.666667	1	1	0.4	21.0912	0.0001693	successful ranked
1804	Terbutaline	LC-ESI-QTOF	positive	225.136	C12H19NO3	1	1	2	4	5	3	1.5	0	1	0.6	1	1	0.5	32.5327	0.0001676	successful ranked
1805	Terbutaline	LC-ESI-QTOF	positive	225.136	C12H19NO3	1	1	2	4	4	3	1.83333	0	1	0.75	1	1	0.666667	15.5455	0.0001441	successful ranked
1806	Terbutaline	LC-ESI-QTOF	positive	225.136	C12H19NO3	1	1	2	8	9	8	1.75	0	1	0.888889	1	1	0.611111	20.7426	0.0002143	successful ranked
1807	Terbutaline	LC-ESI-QTOF	positive	225.136	C12H19NO3	1	1	2	20	21	20	1.52857	0	1	0.952381	1	1	0.461905	16.1925	0.000392	successful ranked
1808	Terbutaline	LC-ESI-QTOF	positive	225.136	C12H19NO3	1	1	2	20	21	15	1.31579	0	1	0.75	1	1	0.263158	19.7906	0.0003263	successful ranked
1809	Terbutaline	LC-ESI-QTOF	positive	225.136	C12H19NO3	1	1	2	25	26	23	1.49231	0	1	0.884615	1	1	0.375385	18.1888	0.0004295	successful ranked
1810	Quinapril	LC-ESI-qTof	positive	438.215	C25H30N2O5	2	2	9	129	32	17	1.28615	0	1	0.653846	0	1	0.0953846	5.58751	0.0017317	successful ranked
1811	Quinapril	LC-ESI-qTof	positive	438.215	C25H30N2O5	3	3	9	59	31	9	1.1	0	1	0.428571	1	0	0.00952381	13.3579	0.0014821	successful ranked
1812	Bumetanide	LC-ESI-qTof	positive	364.109	C17H20N2O5S	2	2	8	1000	30	18	1.22759	1	1	0.6	1	1	0.0183908	0.500156	0.0012852	successful ranked
1813	Bumetanide	LC-ESI-qTof	positive	364.109	C17H20N2O5S	2	2	8	214	30	13	1.14286	1	1	0.448276	1	1	0.0665025	2.25787	0.001311	successful ranked
1814	Bumetanide	LC-ESI-QTOF	positive	364.109	C17H20N2O5S	1	1	8	4	4	3	2	0	1	0.75	1	1	0.5	28.3502	0.0004751	successful ranked
1815	Bumetanide	LC-ESI-QTOF	positive	364.109	C17H20N2O5S	1	1	8	22	22	14	1.2	0	1	0.666667	1	1	0.052381	14.3782	0.0010945	successful ranked
1816	Bumetanide	LC-ESI-QTOF	positive	364.109	C17H20N2O5S	3	3	8	49	30	16	1.34023	1	1	0.533333	0	1	0.105747	13.6413	0.0014855	successful ranked
1817	Bumetanide	LC-ESI-QTOF	positive	364.109	C17H20N2O5S	4	4	8	47	30	14	1.36322	1	1	0.466667	0	1	0.163218	18.3127	0.0013397	successful ranked
1818	Bumetanide	LC-ESI-QTOF	positive	364.109	C17H20N2O5S	1	1	8	53	30	20	1.17701	1	1	0.666667	1	1	0.0252874	17.2115	0.0013128	successful ranked
1819	Sulfapyridine	LC-ESI-qTof	positive	249.057	C11H11N3O2S	1	1	2	302	30	9	1.1634	0	1	0.5	1	1	0.150327	2.6385	0.0003494	successful ranked
1820	Sulfapyridine	LC-ESI-QTOF	positive	249.057	C11H11N3O2S	1	1	2	35	30	20	1.36772	1	1	0.714286	1	1	0.359788	12.6148	0.0004533	successful ranked
1821	Remifentanil	LC-ESI-QTOF	positive	376.2	C20H28N2O5	1	1	5	4	4	3	1.83333	0	1	0.75	1	1	0.666667	37.3494	0.0003039	successful ranked
1822	Remifentanil	LC-ESI-QTOF	positive	376.2	C20H28N2O5	1	1	5	17	17	14	1.7	0	1	0.875	1	1	0.55	11.6218	0.0006586	successful ranked
1823	Remifentanil	LC-ESI-QTOF	positive	376.2	C20H28N2O5	2	2	5	22	23	9	1.15238	0	1	0.428571	0	1	0.0190476	13.189	0.0006864	successful ranked
1824	Remifentanil	LC-ESI-QTOF	positive	376.2	C20H28N2O5	1	1	5	26	27	18	1.41667	0	1	0.75	1	1	0.246377	22.6184	0.0007775	successful ranked
1825	Remifentanil	LC-ESI-QTOF	positive	376.2	C20H28N2O5	1	1	5	40	30	27	1.49195	0	1	0.9	1	1	0.252874	27.3472	0.0009457	successful ranked
1826	Cocaine	LC-ESI-QTOF	positive	303.147	C17H21NO4	1	1	4	4	2	1	2	0	1	0.5	1	1	1	0	0.0001855	successful ranked
1827	Cocaine	LC-ESI-QTOF	positive	303.147	C17H21NO4	1	1	4	6	4	2	1.5	0	1	0.5	1	1	0.333333	44.6354	0.0002324	successful ranked
1828	Cocaine	LC-ESI-QTOF	positive	303.147	C17H21NO4	1	1	4	7	7	5	1.61905	0	1	0.714286	1	1	0.571429	43.4933	0.0002963	successful ranked
1829	Cocaine	LC-ESI-QTOF	positive	303.147	C17H21NO4	1	1	4	18	19	9	1.15205	0	1	0.473684	0	1	0.0467836	28.2011	0.0005115	successful ranked
1830	Cocaine	LC-ESI-QTOF	positive	303.147	C17H21NO4	1	1	4	41	30	22	1.29655	0	1	0.733333	1	1	0.17931	18.8173	0.0007149	successful ranked
1831	Quinidine	LC-ESI-qTof	positive	324.184	C20H24N2O2	2	2	4	1000	30	12	1.17488	0	1	0.413793	0	1	0.00738916	1.31659	0.0007999	successful ranked
1832	Quinidine	LC-ESI-qTof	positive	324.184	C20H24N2O2	4	4	4	791	30	7	1.27586	0	1	0.233333	0	1	0.190805	0.63876	0.0008169	successful ranked
1833	Zonisamide	LC-ESI-qTof	positive	212.026	C8H8N2O3S	1	1	1	42	26	-1	0.999999	-1	-1	-1	-1	-1	-1	10.0108	-1	Single candidate matches with the answer.
1834	Tinidazole	LC-ESI-qTof	positive	247.063	C8H13N3O4S	1	1	4	132	34	14	1.1462	1	1	0.736842	1	1	0.128655	3.96293	0.0008187	successful ranked
1835	Repaglinide	LC-ESI-QTOF	positive	452.268	C27H36N2O4	1	3	3	5	3	1	2	0	0	0.5	1	0	0	109.615	0.0001764	successful ranked
1836	Repaglinide	LC-ESI-QTOF	positive	452.268	C27H36N2O4	1	1	3	9	7	4	1.4	0	1	0.666667	1	1	0.133333	62.8099	0.0003259	successful ranked
1837	Repaglinide	LC-ESI-QTOF	positive	452.268	C27H36N2O4	1	1	3	11	10	6	1.22222	0	1	0.6	1	1	0.0222222	51.9112	0.000305	successful ranked
1838	Repaglinide	LC-ESI-QTOF	positive	452.268	C27H36N2O4	2	2	3	11	12	9	1.33333	0	0	0.75	1	1	0	64.7895	0.0003459	successful ranked
1839	Repaglinide	LC-ESI-QTOF	positive	452.268	C27H36N2O4	3	3	3	26	27	22	1.57265	0	1	0.814815	1	0	0.034188	42.9173	0.0006306	successful ranked
1840	Anileridine	LC-ESI-QTOF	positive	352.215	C22H28N2O2	1	4	6	5	5	3	2	0	0	0.75	1	0	0	112.196	0.000486	successful ranked
1841	Anileridine	LC-ESI-QTOF	positive	352.215	C22H28N2O2	1	2	6	8	9	8	1.75	0	0	0.888889	1	0	0	80.4718	0.0005321	successful ranked
1842	Anileridine	LC-ESI-QTOF	positive	352.215	C22H28N2O2	1	3	6	14	15	12	1.53333	0	0	0.8	1	0	0	61.2806	0.0007208	successful ranked
1843	Amantadine	LC-ESI-QTOF	positive	151.136	C10H17N	1	1	2	3	2	0	0.999999	-1	0	-1	-1	-1	-1	11.9902	0.0001442	No mother-daughter relation is found for all the precursor formula.
1844	Metronidazole	LC-ESI-QTOF	positive	171.064	C6H9N3O3	1	1	1	10	10	-1	0.999999	-1	-1	-1	-1	-1	-1	12.6561	-1	Single candidate matches with the answer.
1845	Levosimendan	LC-ESI-qTof	positive	280.107	C14H12N6O	1	1	4	265	30	16	1.15862	1	1	0.533333	1	1	0.0712644	1.262	0.0007102	successful ranked
1846	Maprotiline	LC-ESI-QTOF	positive	277.183	C20H23N	3	4	5	4	2	1	2	0	0	0.5	1	0	0	0	0.0002444	successful ranked
1847	Maprotiline	LC-ESI-QTOF	positive	277.183	C20H23N	1	1	5	22	20	13	1.45263	0	1	0.65	1	1	0.247368	9.20775	0.0006782	successful ranked
1848	Maprotiline	LC-ESI-QTOF	positive	277.183	C20H23N	1	1	5	37	30	17	1.32644	0	1	0.566667	0	1	0.0804598	6.63367	0.0008732	successful ranked
1849	Maprotiline	LC-ESI-QTOF	positive	277.183	C20H23N	1	1	5	36	30	23	1.56782	0	1	0.766667	1	1	0.354023	6.81512	0.0009717	successful ranked
1850	Maprotiline	LC-ESI-QTOF	positive	277.183	C20H23N	1	1	5	35	30	22	1.52414	0	1	0.733333	1	1	0.374713	9.96883	0.0008738	successful ranked
1851	Salmeterol	LC-ESI-QTOF	positive	415.272	C25H37NO4	1	2	3	3	3	2	2	0	0	0.666667	1	0	0	10.3972	0.0002166	successful ranked
1852	Salmeterol	LC-ESI-QTOF	positive	415.272	C25H37NO4	1	1	3	11	11	10	1.90909	0	1	0.909091	1	1	0.636364	41.5429	0.0003117	successful ranked
1853	Salmeterol	LC-ESI-QTOF	positive	415.272	C25H37NO4	1	1	3	60	30	23	1.47356	0	1	0.766667	1	1	0.183908	13.4112	0.0006378	successful ranked
1854	Salmeterol	LC-ESI-QTOF	positive	415.272	C25H37NO4	1	1	3	41	30	24	1.54762	0	1	0.857143	1	1	0.240741	27.2394	0.000623	successful ranked
1855	Salmeterol	LC-ESI-QTOF	positive	415.272	C25H37NO4	1	1	3	34	30	22	1.49471	0	1	0.785714	1	1	0.216931	33.1354	0.0006429	successful ranked
1856	Felbamate	LC-ESI-qTof	positive	238.095	C11H14N2O4	2	2	2	123	30	5	1.16667	0	1	0.384615	0	1	0.0641026	3.46725	0.0003441	successful ranked
1857	Felbamate	LC-ESI-qTof	positive	238.095	C11H14N2O4	1	1	2	51	30	8	1.25758	0	1	0.666667	1	1	0.166667	6.49784	0.0003599	successful ranked
1858	Rizatriptan	LC-ESI-qTof	positive	269.164	C15H19N5	1	1	2	173	23	10	1.24211	0	1	0.5	1	1	0.121053	2.91172	0.0003735	successful ranked
1859	Methylprednisolone	LC-ESI-qTof	positive	374.209	C22H30O5	1	1	8	646	30	22	1.56092	0	1	0.733333	1	1	0.225287	0.744652	0.0013007	successful ranked
1860	Methylprednisolone	LC-ESI-qTof	positive	374.209	C22H30O5	1	1	8	392	30	21	1.51724	0	1	0.7	1	0	0.0942529	1.16749	0.0013791	successful ranked
1861	Methylprednisolone	LC-ESI-qTof	positive	374.209	C22H30O5	1	1	8	1000	30	25	1.70115	0	1	0.833333	1	1	0.335632	0.79626	0.0014233	successful ranked
1862	Methylprednisolone	LC-ESI-QTOF	positive	374.209	C22H30O5	1	1	8	55	30	14	1.22989	0	1	0.466667	0	1	0.101149	5.24159	0.0011601	successful ranked
1863	Methylprednisolone	LC-ESI-QTOF	positive	374.209	C22H30O5	1	1	8	203	30	18	1.35632	0	1	0.6	1	1	0.227586	1.84323	0.0012444	successful ranked
1864	Methylprednisolone	LC-ESI-QTOF	positive	374.209	C22H30O5	1	1	8	245	30	16	1.30805	0	1	0.533333	0	1	0.091954	1.9378	0.0011943	successful ranked
1865	Methylprednisolone	LC-ESI-QTOF	positive	374.209	C22H30O5	1	1	8	261	30	18	1.35402	0	1	0.6	0	1	0.0735632	2.56619	0.0012997	successful ranked
1866	Methylprednisolone	LC-ESI-QTOF	positive	374.209	C22H30O5	1	1	8	213	30	18	1.32414	0	1	0.6	0	1	0.0344828	5.55758	0.0013451	successful ranked
1867	Telmisartan	LC-ESI-qTof	positive	514.237	C33H30N4O2	5	5	9	184	32	7	1.14409	1	1	0.225806	0	1	0.0322581	4.31332	0.0015292	successful ranked
1868	Telmisartan	LC-ESI-QTOF	negative	514.237	C33H30N4O2	2	9	9	4	3	0	1.33333	0	0	0	0	1	0.333333	68.8993	0.0003445	successful ranked
1869	Telmisartan	LC-ESI-QTOF	negative	514.237	C33H30N4O2	4	9	9	3	4	0	1.16667	0	0	0	0	0	0	51.7472	0.0003972	successful ranked
1870	Telmisartan	LC-ESI-QTOF	negative	514.237	C33H30N4O2	6	9	9	4	5	0	1.2	0	0	0	0	1	0.1	75.1957	0.000467	successful ranked
1871	Telmisartan	LC-ESI-QTOF	negative	514.237	C33H30N4O2	5	9	9	3	4	0	1.66667	0	0	0	0	1	0.5	116.867	0.0004269	successful ranked
1872	Telmisartan	LC-ESI-QTOF	positive	514.237	C33H30N4O2	1	1	9	3	1	0	0.999997	-1	0	-1	-1	-1	-1	0	0	No mother-daughter relation is found for all the precursor formula.
1873	Telmisartan	LC-ESI-QTOF	positive	514.237	C33H30N4O2	1	1	9	3	1	0	0.999997	-1	0	-1	-1	-1	-1	0	0	No mother-daughter relation is found for all the precursor formula.
1874	Telmisartan	LC-ESI-QTOF	positive	514.237	C33H30N4O2	4	9	9	4	3	0	1.33333	0	0	0	0	0	0	11.3149	0.0004035	successful ranked
1875	Telmisartan	LC-ESI-QTOF	positive	514.237	C33H30N4O2	2	2	9	15	13	6	1.26923	1	1	0.461538	1	0	0.0512821	51.394	0.0008378	successful ranked
1876	Telmisartan	LC-ESI-QTOF	positive	514.237	C33H30N4O2	2	2	9	30	28	11	1.21429	1	1	0.392857	0	1	0.047619	27.1135	0.0013652	successful ranked
1877	Dipyridamole	LC-ESI-qTof	positive	504.317	C24H40N8O4	3	3	5	832	30	12	1.39667	1	1	0.48	0	1	0.233333	1.24469	0.0009839	successful ranked
1878	Dipyridamole	LC-ESI-qTof	positive	504.317	C24H40N8O4	5	5	5	588	30	7	1.3	1	1	0.28	0	1	0.213333	2.08219	0.0009032	successful ranked
1879	Physostigmine	LC-ESI-qTof	positive	275.163	C15H21N3O2	1	1	2	1000	27	18	1.26211	0	1	0.666667	1	1	0.225071	0.688968	0.00037	successful ranked
1880	Exemestane	LC-ESI-qTof	positive	296.178	C20H24O2	1	1	4	852	30	27	1.73563	0	1	0.9	1	1	0.342529	0.54808	0.0008776	successful ranked
1881	Exemestane	LC-ESI-qTof	positive	296.178	C20H24O2	1	1	4	852	30	27	1.73563	0	1	0.9	1	1	0.342529	0.54808	0.0009426	successful ranked
1882	Exemestane	LC-ESI-qTof	positive	296.178	C20H24O2	1	1	4	852	30	27	1.73563	0	1	0.9	1	1	0.342529	0.54808	0.0008695	successful ranked
1883	Exemestane	LC-ESI-qTof	positive	296.178	C20H24O2	1	1	4	852	30	27	1.73563	0	1	0.9	1	1	0.342529	0.54808	0.0008737	successful ranked
1884	Exemestane	LC-ESI-qTof	positive	296.178	C20H24O2	1	1	4	852	30	27	1.73563	0	1	0.9	1	1	0.342529	0.54808	0.000895	successful ranked
1885	Exemestane	LC-ESI-qTof	positive	296.178	C20H24O2	1	1	4	852	30	27	1.73563	0	1	0.9	1	1	0.342529	0.54808	0.0008452	successful ranked
1886	Exemestane	LC-ESI-qTof	positive	296.178	C20H24O2	1	1	4	852	30	27	1.73563	0	1	0.9	1	1	0.342529	0.54808	0.000877	successful ranked
1887	Exemestane	LC-ESI-qTof	positive	296.178	C20H24O2	1	1	4	852	30	27	1.73563	0	1	0.9	1	1	0.342529	0.54808	0.0009505	successful ranked
1888	Exemestane	LC-ESI-qTof	positive	296.178	C20H24O2	1	1	4	852	30	27	1.73563	0	1	0.9	1	1	0.342529	0.54808	0.0008919	successful ranked
1889	Exemestane	LC-ESI-QTOF	positive	296.178	C20H24O2	1	1	4	17	15	9	1.32381	0	1	0.6	1	1	0.142857	13.0307	0.0004479	successful ranked
1890	Exemestane	LC-ESI-QTOF	positive	296.178	C20H24O2	1	1	4	121	30	24	1.56322	0	1	0.8	1	1	0.374713	2.03649	0.0007703	successful ranked
1891	Exemestane	LC-ESI-QTOF	positive	296.178	C20H24O2	1	1	4	136	30	28	1.75632	0	1	0.933333	1	1	0.402299	1.9461	0.0008448	successful ranked
1892	Exemestane	LC-ESI-QTOF	positive	296.178	C20H24O2	1	1	4	116	30	28	1.70575	0	1	0.933333	1	1	0.349425	3.45106	0.0008328	successful ranked
1893	Exemestane	LC-ESI-QTOF	positive	296.178	C20H24O2	1	1	4	92	30	29	1.6092	0	1	0.966667	1	1	0.337931	5.3029	0.0008386	successful ranked
1894	Oxaprozin	LC-ESI-QTOF	positive	293.105	C18H15NO3	1	7	8	3	3	1	1.33333	0	0	0.333333	1	0	0	21.0771	0.0003976	successful ranked
1895	Oxaprozin	LC-ESI-QTOF	positive	293.105	C18H15NO3	1	1	8	6	6	4	1.66667	0	1	0.666667	1	1	0.266667	31.3412	0.0006081	successful ranked
1896	Oxaprozin	LC-ESI-QTOF	positive	293.105	C18H15NO3	2	2	8	8	9	5	1.66667	0	1	0.714286	0	1	0.142857	18.7448	0.0007176	successful ranked
1897	Oxaprozin	LC-ESI-QTOF	positive	293.105	C18H15NO3	1	1	8	11	12	9	1.52727	0	1	0.818182	1	1	0.127273	25.3288	0.000913	successful ranked
1898	Oxaprozin	LC-ESI-QTOF	positive	293.105	C18H15NO3	1	1	8	17	18	12	1.40441	0	1	0.705882	0	1	0.0808824	27.3164	0.001105	successful ranked
1899	Azathioprine	LC-ESI-qTof	positive	277.038	C9H7N7O2S	1	1	6	453	32	16	1.13978	1	1	0.516129	0	1	0.0365591	1.2018	0.0010792	successful ranked
1900	Azathioprine	LC-ESI-qTof	positive	277.038	C9H7N7O2S	2	2	6	226	30	10	1.09655	1	1	0.333333	0	1	0.00689655	1.83593	0.0009698	successful ranked
1901	Doxorubicin	LC-ESI-qTof	positive	543.174	C27H29NO11	1	1	10	349	30	17	1.2092	0	1	0.566667	1	1	0.0689655	3.05712	0.0017138	successful ranked
1902	Cromoglicic acid	LC-ESI-QTOF	positive	468.069	C23H16O11	1	1	8	5	5	4	2	0	1	0.8	1	1	0.7	76.9875	0.0004871	successful ranked
1903	Cromoglicic acid	LC-ESI-QTOF	positive	468.069	C23H16O11	1	1	8	8	8	7	1.96429	0	1	0.875	1	1	0.428571	76.094	0.0007015	successful ranked
1904	Cromoglicic acid	LC-ESI-QTOF	positive	468.069	C23H16O11	1	1	8	17	18	14	1.51634	0	1	0.777778	1	0	0.0261438	49.2804	0.0009435	successful ranked
1905	Cromoglicic acid	LC-ESI-QTOF	positive	468.069	C23H16O11	2	2	8	29	30	26	1.54253	0	1	0.866667	0	1	0.00689655	40.891	0.0013714	successful ranked
1906	Cromoglicic acid	LC-ESI-QTOF	positive	468.069	C23H16O11	1	1	8	49	30	29	1.69885	0	1	0.966667	1	1	0.0252874	31.7446	0.0015294	successful ranked
1907	Busulfan	LC-ESI-qTof	positive	246.023	C6H14O6S2	3	4	5	153	36	2	1.04762	0	0	0.133333	0	1	0.0285714	1.88943	0.000874	successful ranked
1908	Busulfan	LC-ESI-qTof	positive	246.023	C6H14O6S2	4	4	5	39	25	1	1.03333	0	1	0.0625	0	1	0.0166667	6.75913	0.0008016	successful ranked
1909	Ketoprofen	LC-ESI-qTof	positive	254.094	C16H14O3	1	1	6	460	20	9	1.17544	0	1	0.473684	0	1	0.0116959	0.918362	0.0008162	successful ranked
1910	Ketoprofen	LC-ESI-qTof	positive	254.094	C16H14O3	1	1	6	203	22	11	1.20346	0	1	0.5	0	1	0.0735931	2.53252	0.0008059	successful ranked
1911	Ketoprofen	LC-ESI-qTof	positive	254.094	C16H14O3	2	2	6	140	30	7	1.11067	0	1	0.304348	0	1	0.00790514	3.88214	0.0010458	successful ranked
1912	Ketoprofen	LC-ESI-QTOF	negative	254.094	C16H14O3	4	5	6	8	8	1	1.14286	0	0	0.142857	0	0	0	15.0984	0.0005042	successful ranked
1913	Ketoprofen	LC-ESI-QTOF	positive	254.094	C16H14O3	3	6	6	4	3	0	1.33333	0	0	0	0	0	0	25.6997	0.0002672	successful ranked
1914	Ketoprofen	LC-ESI-QTOF	positive	254.094	C16H14O3	3	6	6	5	5	0	1.1	0	0	0	0	0	0	18.1875	0.0002875	successful ranked
1915	Ketoprofen	LC-ESI-QTOF	positive	254.094	C16H14O3	5	6	6	4	5	0	1.2	0	0	0	0	1	0.1	17.3321	0.0003467	successful ranked
1916	Ketoprofen	LC-ESI-QTOF	positive	254.094	C16H14O3	3	3	6	10	10	2	1.08889	0	0	0.2	0	0	0.0222222	24.8324	0.0005477	successful ranked
1917	Ketoprofen	LC-ESI-QTOF	positive	254.094	C16H14O3	1	1	6	12	13	7	1.23077	0	1	0.538462	0	1	0.102564	14.6997	0.0005961	successful ranked
1918	Ketoprofen	LC-ESI-QTOF	positive	254.094	C16H14O3	1	1	6	5	6	3	1.4	0	1	0.6	1	0	0.1	29.7763	0.0004264	successful ranked
1919	Metyrapone	LC-ESI-qTof	positive	226.111	C14H14N2O	2	2	5	590	33	6	1.16484	0	1	0.428571	0	1	0.032967	1.38609	0.0008592	successful ranked
1920	Sulfamethoxazole	LC-ESI-qTof	positive	253.052	C10H11N3O3S	1	1	2	623	30	19	1.29	0	1	0.76	1	1	0.263333	0.559393	0.0004625	successful ranked
1921	Sulfamethoxazole	LC-ESI-qTof	positive	253.052	C10H11N3O3S	1	1	2	438	31	13	1.08333	1	1	0.541667	1	1	0.057971	2.41605	0.000421	successful ranked
1922	Sulfamethoxazole	LC-ESI-QTOF	negative	253.052	C10H11N3O3S	1	1	2	4	4	3	1.83333	0	1	0.75	1	1	0.833333	41.8668	0.0001516	successful ranked
1923	Sulfamethoxazole	LC-ESI-QTOF	negative	253.052	C10H11N3O3S	1	1	2	4	5	4	1.8	0	1	0.8	1	1	0.6	35.233	0.0001598	successful ranked
1924	Sulfamethoxazole	LC-ESI-QTOF	negative	253.052	C10H11N3O3S	1	1	2	4	5	4	1.8	0	1	0.8	1	1	0.7	35.2331	0.0001541	successful ranked
1925	Sulfamethoxazole	LC-ESI-QTOF	positive	253.052	C10H11N3O3S	1	1	2	50	30	21	1.34713	1	1	0.7	1	1	0.181609	9.05271	0.0004324	successful ranked
1926	Sulfamethoxazole	LC-ESI-QTOF	positive	253.052	C10H11N3O3S	1	1	2	19	17	12	1.225	0	1	0.75	1	1	0.166667	14.9574	0.000292	successful ranked
1927	Sulfamethoxazole	LC-ESI-QTOF	positive	253.052	C10H11N3O3S	1	1	2	22	23	19	1.22134	0	1	0.826087	1	1	0.15415	13.9198	0.0003796	successful ranked
1928	Sulfamethoxazole	LC-ESI-QTOF	positive	253.052	C10H11N3O3S	1	1	2	13	14	11	1.28571	0	1	0.785714	1	1	0.21978	25.1861	0.000248	successful ranked
1929	Sulfamethoxazole	LC-ESI-QTOF	positive	253.052	C10H11N3O3S	1	1	2	5	6	5	1.6	0	1	0.833333	1	1	0.4	38.4419	0.0001662	successful ranked
1930	Sulfamethoxazole	LC-ESI-QTOF	positive	253.052	C10H11N3O3S	1	1	2	7	7	4	1.33333	0	1	0.571429	1	1	0.047619	22.8857	0.0001865	successful ranked
1931	Sulfamethoxazole	LC-ESI-QTOF	positive	253.052	C10H11N3O3S	1	1	2	17	17	16	1.74265	0	1	0.941176	1	1	0.455882	14.1623	0.000293	successful ranked
1932	Sulfamethoxazole	LC-ESI-QTOF	positive	253.052	C10H11N3O3S	1	1	2	16	16	15	1.65	0	1	0.9375	1	1	0.333333	18.311	0.0002891	successful ranked
1933	Sulfamethoxazole	LC-ESI-QTOF	positive	253.052	C10H11N3O3S	1	1	2	18	19	18	1.75439	0	1	0.947368	1	1	0.467836	21.3847	0.0003524	successful ranked
1934	Mycophenolic acid	LC-ESI-qTof	positive	320.126	C17H20O6	1	1	9	46	25	4	1.10989	0	1	0.285714	1	0	0.021978	12.9212	0.0011983	successful ranked
1935	Mycophenolic acid	LC-ESI-qTof	positive	320.126	C17H20O6	4	4	9	45	26	3	1.08571	0	1	0.2	0	0	0.00952381	10.103	0.0013663	successful ranked
1936	Mycophenolic acid	LC-ESI-qTof	positive	320.126	C17H20O6	2	2	9	46	30	6	1.19118	0	1	0.352941	0	1	0.0514706	8.94924	0.0015102	successful ranked
1937	Mycophenolic acid	LC-ESI-qTof	positive	320.126	C17H20O6	1	1	9	362	30	10	1.11034	0	1	0.333333	0	1	0.0183908	1.02381	0.0014734	successful ranked
1938	Mycophenolic acid	LC-ESI-qTof	positive	320.126	C17H20O6	6	6	9	708	8	1	1.10714	0	0	0.125	0	0	0	0.429468	0.0006746	successful ranked
1939	Irbesartan	LC-ESI-qTof	positive	428.232	C25H28N6O	1	1	5	75	32	12	1.11396	1	1	0.444444	1	1	0.0569801	7.31298	0.0009721	successful ranked
1940	Irbesartan	LC-ESI-QTOF	negative	428.232	C25H28N6O	1	3	5	5	4	1	1.33333	0	0	0.333333	1	0	0	98.5611	0.0002856	successful ranked
1941	Irbesartan	LC-ESI-QTOF	positive	428.232	C25H28N6O	1	1	5	10	8	3	1.2381	1	1	0.428571	1	0	0.047619	64.1318	0.0004898	successful ranked
1942	Irbesartan	LC-ESI-QTOF	positive	428.232	C25H28N6O	4	5	5	5	6	1	1.2	1	0	0.2	0	0	0	75.4023	0.0003767	successful ranked
1943	Irbesartan	LC-ESI-QTOF	positive	428.232	C25H28N6O	2	2	5	9	10	5	1.25	1	0	0.555556	1	0	0	71.9455	0.0005133	successful ranked
1944	Irbesartan	LC-ESI-QTOF	positive	428.232	C25H28N6O	1	1	5	18	19	7	1.13072	1	1	0.388889	1	0	0.0130719	50.9919	0.0006464	successful ranked
1945	Probenecid	LC-ESI-qTof	positive	285.103	C13H19NO4S	1	1	5	95	30	7	1.15833	0	1	0.4375	1	1	0.125	3.94084	0.000766	successful ranked
1946	Probenecid	LC-ESI-qTof	positive	285.103	C13H19NO4S	1	1	5	123	31	10	1.14286	0	1	0.454545	1	1	0.0995671	2.5494	0.0008373	successful ranked
1947	Procainamide	LC-ESI-qTof	positive	235.168	C13H21N3O	1	1	2	81	34	6	1.14286	0	1	0.4	1	1	0.114286	3.97012	0.0003723	successful ranked
1948	Tolterodine	LC-ESI-qTof	positive	325.241	C22H31NO	1	1	2	1000	31	18	1.27742	0	1	0.580645	1	1	0.255914	0.627996	0.0004293	successful ranked
1949	Thalidomide	LC-ESI-qTof	positive	258.064	C13H10N2O4	3	3	7	84	33	7	1.15263	0	1	0.35	0	1	0.0473684	3.74316	0.001263	successful ranked
1950	Thalidomide	LC-ESI-qTof	positive	258.064	C13H10N2O4	1	1	7	60	33	8	1.07971	0	1	0.333333	0	1	0.0181159	5.85504	0.0011909	successful ranked
1951	Thalidomide	LC-ESI-qTof	positive	258.064	C13H10N2O4	1	1	7	273	30	16	1.19088	0	1	0.592593	1	1	0.0968661	1.76034	0.0012235	successful ranked
1952	Novobiocin	LC-ESI-QTOF	negative	612.232	C31H36N2O11	1	3	9	3	3	1	1.33333	0	0	0.333333	1	0	0	74.5115	0.0003991	successful ranked
1953	Novobiocin	LC-ESI-QTOF	negative	612.232	C31H36N2O11	1	7	9	3	3	1	1.33333	0	0	0.333333	1	0	0	98.5498	0.0004241	successful ranked
1954	Novobiocin	LC-ESI-QTOF	negative	612.232	C31H36N2O11	1	1	9	4	5	4	1.7	0	1	0.8	1	1	0.3	93.608	0.0005101	successful ranked
1955	Novobiocin	LC-ESI-QTOF	negative	612.232	C31H36N2O11	1	1	9	4	5	4	1.5	0	1	0.8	1	1	0.2	107.656	0.0004885	successful ranked
1956	Novobiocin	LC-ESI-QTOF	positive	612.232	C31H36N2O11	1	1	9	11	10	7	1.31111	1	1	0.7	1	1	0.155556	68.6487	0.0007616	successful ranked
1957	Novobiocin	LC-ESI-QTOF	positive	612.232	C31H36N2O11	1	1	9	21	22	18	1.48918	0	1	0.818182	1	1	0.207792	55.4248	0.0012743	successful ranked
1958	Novobiocin	LC-ESI-QTOF	positive	612.232	C31H36N2O11	1	1	9	14	15	10	1.26667	0	1	0.666667	1	1	0.114286	66.3087	0.0009473	successful ranked
1959	Novobiocin	LC-ESI-QTOF	positive	612.232	C31H36N2O11	1	1	9	13	14	10	1.24176	0	1	0.714286	1	1	0.0769231	73.2242	0.0009531	successful ranked
1960	Novobiocin	LC-ESI-QTOF	positive	612.232	C31H36N2O11	4	4	9	12	13	6	1.25758	0	0	0.5	0	1	0.106061	80.3654	0.0009606	successful ranked
1961	Novobiocin	LC-ESI-QTOF	positive	612.232	C31H36N2O11	1	1	9	15	15	11	1.28571	0	1	0.733333	1	1	0.114286	61.9452	0.0010104	successful ranked
1962	Nitrendipine	LC-ESI-qTof	positive	360.132	C18H20N2O6	1	1	7	468	30	18	1.2092	0	1	0.6	1	1	0.0942529	1.24128	0.0012672	successful ranked
1963	Tocainide	LC-ESI-qTof	positive	192.126	C11H16N2O	1	1	2	54	20	1	1.01818	0	1	0.0909091	1	1	0.0181818	7.76141	0.0003366	successful ranked
1964	Praziquantel	LC-ESI-QTOF	positive	312.184	C19H24N2O2	3	3	3	5	3	0	1.33333	0	1	0	0	0	0	76.4146	0.0001768	successful ranked
1965	Praziquantel	LC-ESI-QTOF	positive	312.184	C19H24N2O2	3	3	3	12	11	5	1.36364	0	1	0.454545	0	1	0.0727273	16.1068	0.0003117	successful ranked
1966	Praziquantel	LC-ESI-QTOF	positive	312.184	C19H24N2O2	1	1	3	23	23	14	1.37154	0	1	0.608696	1	1	0.118577	13.4069	0.000501	successful ranked
1967	Praziquantel	LC-ESI-QTOF	positive	312.184	C19H24N2O2	1	1	3	34	30	19	1.36322	0	1	0.633333	1	0	0.0942529	10.8777	0.000648	successful ranked
1968	Praziquantel	LC-ESI-QTOF	positive	312.184	C19H24N2O2	1	1	3	35	30	23	1.41149	0	1	0.766667	1	1	0.105747	12.8583	0.0006447	successful ranked
1969	Praziquantel	LC-ESI-QTOF	positive	312.184	C19H24N2O2	1	1	3	5	3	1	1.33333	0	1	0.333333	1	1	0.333333	76.4147	0.0001653	successful ranked
1970	Praziquantel	LC-ESI-QTOF	positive	312.184	C19H24N2O2	1	1	3	8	7	5	1.71429	0	1	0.714286	1	1	0.428571	29.9735	0.0002711	successful ranked
1971	Praziquantel	LC-ESI-QTOF	positive	312.184	C19H24N2O2	1	1	3	16	16	11	1.49167	0	1	0.6875	1	1	0.225	17.2471	0.0004102	successful ranked
1972	Praziquantel	LC-ESI-QTOF	positive	312.184	C19H24N2O2	1	1	3	19	20	13	1.46199	0	1	0.684211	1	1	0.181287	17.1762	0.0004662	successful ranked
1973	Praziquantel	LC-ESI-QTOF	positive	312.184	C19H24N2O2	1	1	3	21	22	18	1.58874	0	1	0.818182	1	0	0.04329	23.6181	0.0005301	successful ranked
1974	Amoxicillin	LC-ESI-qTof	positive	365.105	C16H19N3O5S	1	1	11	442	30	17	1.19048	1	1	0.607143	1	1	0.116402	1.00717	0.0018172	successful ranked
1975	Oxybutynin	LC-ESI-qTof	positive	357.23	C22H31NO3	2	2	2	69	32	3	1.02174	0	1	0.125	0	1	0.00362319	5.57177	0.0003722	successful ranked
1976	Oxybutynin	LC-ESI-QTOF	positive	357.23	C22H31NO3	1	1	2	17	17	15	1.59167	0	1	0.9375	1	1	0.475	20.2013	0.0003345	successful ranked
1977	Oxybutynin	LC-ESI-QTOF	positive	357.23	C22H31NO3	1	1	2	53	30	27	1.45813	0	1	0.931034	1	1	0.29803	18.8219	0.0004485	successful ranked
1978	Oxybutynin	LC-ESI-QTOF	positive	357.23	C22H31NO3	1	1	2	50	30	27	1.43122	0	1	0.964286	1	1	0.275132	22.3874	0.0005846	successful ranked
1979	Oxybutynin	LC-ESI-QTOF	positive	357.23	C22H31NO3	1	1	2	44	30	28	1.42857	0	1	0.965517	1	1	0.275862	27.9323	0.0005687	successful ranked
1980	Glipizide	LC-ESI-qTof	positive	445.178	C21H27N5O4S	1	2	9	333	31	7	1.03684	1	0	0.35	1	1	0	1.76905	0.0015615	successful ranked
1981	Glipizide	LC-ESI-qTof	positive	445.178	C21H27N5O4S	1	1	9	137	30	9	1.05848	1	1	0.473684	1	1	0.0175439	5.92185	0.0014594	successful ranked
1982	Glipizide	LC-ESI-qTof	positive	445.178	C21H27N5O4S	2	2	9	1000	30	15	1.22069	1	1	0.5	0	1	0.0781609	1.27132	0.0016	successful ranked
1983	Mequitazine	LC-ESI-qTof	positive	322.15	C20H22N2S	2	2	5	944	30	12	1.21538	0	1	0.461538	0	1	0.0707692	0.498497	0.0009272	successful ranked
1984	Diphenoxylate	LC-ESI-QTOF	positive	452.246	C30H32N2O2	2	9	9	3	3	0	1.33333	0	0	0	0	1	0.333333	12.7136	0.0003649	successful ranked
1985	Diphenoxylate	LC-ESI-QTOF	positive	452.246	C30H32N2O2	1	1	9	26	26	24	1.64923	0	1	0.923077	1	1	0.104615	21.1756	0.0014732	successful ranked
1986	Diphenoxylate	LC-ESI-QTOF	positive	452.246	C30H32N2O2	2	2	9	79	30	24	1.52874	0	1	0.8	0	1	0.0413793	10.1112	0.00165	successful ranked
1987	Diphenoxylate	LC-ESI-QTOF	positive	452.246	C30H32N2O2	1	1	9	81	30	21	1.37685	0	1	0.724138	1	0	0.0394089	15.8376	0.0015329	successful ranked
1988	Streptomycin	LC-ESI-QTOF	positive	581.266	C21H39N7O12	5	6	6	4	4	0	1.16667	1	0	0	0	0	0	131.95	0.0003164	successful ranked
1989	Streptomycin	LC-ESI-QTOF	positive	581.266	C21H39N7O12	5	5	6	34	30	6	1.15862	1	1	0.2	0	1	0.0436782	19.4703	0.0010144	successful ranked
1990	Streptomycin	LC-ESI-QTOF	positive	581.266	C21H39N7O12	6	6	6	90	30	10	1.21921	1	1	0.344828	0	1	0.0665025	13.2873	0.0011287	successful ranked
1991	Streptomycin	LC-ESI-QTOF	positive	581.266	C21H39N7O12	4	4	6	124	30	11	1.20158	1	1	0.478261	0	1	0.0118577	19.7976	0.0010722	successful ranked
1992	Orlistat	LC-ESI-qTof	positive	495.392	C29H53NO5	1	2	3	20	9	1	1.06667	0	0	0.166667	1	0	0	79.5734	0.0003377	successful ranked
1993	Orlistat	LC-ESI-qTof	positive	495.392	C29H53NO5	1	2	3	6	5	1	1.1	0	0	0.2	1	0	0	170.792	0.0001845	successful ranked
1994	Orlistat	LC-ESI-qTof	positive	495.392	C29H53NO5	2	2	3	182	31	5	1.05	0	1	0.2	0	1	0.0333333	4.4596	0.0005483	successful ranked
1995	Orlistat	LC-ESI-qTof	positive	495.392	C29H53NO5	2	2	3	182	31	5	1.05	0	1	0.2	0	1	0.0333333	4.4596	0.0005638	successful ranked
1996	Orlistat	LC-ESI-qTof	positive	495.392	C29H53NO5	1	1	3	152	30	12	1.10345	0	1	0.4	1	1	0.0712644	15.8093	0.0008981	successful ranked
1997	Orlistat	LC-ESI-qTof	positive	495.392	C29H53NO5	1	1	3	152	30	12	1.10345	0	1	0.4	1	1	0.0712644	15.8093	0.0006573	successful ranked
1998	Primaquine	LC-ESI-qTof	positive	259.168	C15H21N3O	1	1	2	151	32	13	1.20615	0	1	0.5	1	1	0.175385	1.95585	0.0004233	successful ranked
1999	Primaquine	LC-ESI-QTOF	positive	259.168	C15H21N3O	1	1	2	8	6	3	1.33333	0	1	0.5	1	1	0.133333	39.0495	0.0001731	successful ranked
[truncated: 1,030 more rows]

## Sheet: HMDB_ITFT_result
No	Name	Instrument_Type	Ionization_Mode	Mass	Formula	Rank_Reduced	Original_Rank	Original_Candidates	Peak_Num	Frag_Num	Frag_w_Formula	Score	Is_Reduced	Is_Top1_Uniq	Char_Frag_Percent	Is_CFP_Max	Is_CFP_Max_Uniq	Top2_Sore_Diff	Peak_Dist_SD	Comp_Time	Note
1	Biotin	LC-ESI-ITFT	negative	244.088	C10H16N2O3S	1	1	1	14	14	-1	0.999996	-1	-1	-1	-1	-1	-1	10.0231	-1	Single candidate matches with the answer.
2	Biotin	LC-ESI-ITFT	positive	244.088	C10H16N2O3S	1	1	1	74	30	-1	0.999996	-1	-1	-1	-1	-1	-1	3.19521	-1	Single candidate matches with the answer.
3	Carnosine	LC-ESI-ITFT (LTQ Orbitrap XL; Thermo Scientfic)	positive	226.107	C9H14N4O3	1	1	2	137	21	7	1.40909	0	1	0.583333	1	1	0.393939	2.96242	0.0003368	successful ranked
4	Carnosine	LC-ESI-ITFT (LTQ Orbitrap XL; Thermo Scientfic)	positive	226.107	C9H14N4O3	1	1	2	20	17	1	1.03571	0	1	0.125	1	1	0.0357143	8.12117	0.0002769	successful ranked
5	Carnosine	LC-ESI-ITFT (LTQ Orbitrap XL; Thermo Scientfic)	positive	226.107	C9H14N4O3	1	1	2	9	5	0	0.999996	-1	0	-1	-1	-1	-1	22.1625	0.0001349	No mother-daughter relation is found for all the precursor formula.
6	Carnosine	LC-ESI-ITFT (LTQ Orbitrap XL; Thermo Scientfic)	positive	226.107	C9H14N4O3	2	2	2	17	11	0	1.1	0	1	0	0	1	0.1	6.13668	0.00018	successful ranked
7	Carnosine	LC-ESI-ITFT (LTQ Orbitrap XL; Thermo Scientfic)	positive	226.107	C9H14N4O3	1	1	2	188	25	9	1.275	0	1	0.5625	1	1	0.275	1.96098	0.0003102	successful ranked
8	Carnosine	LC-ESI-ITFT (LTQ Orbitrap XL; Thermo Scientfic)	positive	226.107	C9H14N4O3	1	1	2	19	19	0	0.999996	-1	0	-1	-1	-1	-1	8.3379	0.0002318	No mother-daughter relation is found for all the precursor formula.
9	Carnosine	LC-ESI-ITFT (LTQ Orbitrap XL; Thermo Scientfic)	positive	226.107	C9H14N4O3	2	2	2	4	4	0	2	0	1	0	0	1	1	42.3169	0.0001327	successful ranked
10	Carnosine	LC-ESI-ITFT (LTQ Orbitrap XL; Thermo Scientfic)	positive	226.107	C9H14N4O3	1	2	2	16	10	1	1.04762	0	0	0.142857	1	0	0	7.77484	0.000201	successful ranked
11	Carnosine	LC-ESI-ITFT (LTQ Orbitrap XL; Thermo Scientfic)	negative	226.107	C9H14N4O3	1	1	2	325	31	12	1.26316	0	1	0.631579	1	1	0.245614	3.81979	0.0003642	successful ranked
12	Carnosine	LC-ESI-ITFT (LTQ Orbitrap XL; Thermo Scientfic)	negative	226.107	C9H14N4O3	1	1	2	17	9	0	0.999996	-1	0	-1	-1	-1	-1	7.94054	0.0001764	No mother-daughter relation is found for all the precursor formula.
13	Carnosine	LC-ESI-ITFT (LTQ Orbitrap XL; Thermo Scientfic)	negative	226.107	C9H14N4O3	1	1	2	5	3	0	0.999996	-1	0	-1	-1	-1	-1	37.3609	0.0001144	No mother-daughter relation is found for all the precursor formula.
14	Carnosine	LC-ESI-ITFT (LTQ Orbitrap XL; Thermo Scientfic)	negative	226.107	C9H14N4O3	1	1	2	722	33	11	1.2	0	1	0.55	1	1	0.194737	2.47615	0.0003542	successful ranked
15	Carnosine	LC-ESI-ITFT (LTQ Orbitrap XL; Thermo Scientfic)	negative	226.107	C9H14N4O3	1	1	2	18	9	1	1.06667	0	1	0.166667	1	1	0.0666667	7.6453	0.0001549	successful ranked
16	Carnosine	LC-ESI-ITFT (LTQ Orbitrap XL; Thermo Scientfic)	negative	226.107	C9H14N4O3	1	1	2	4	2	0	0.999996	-1	0	-1	-1	-1	-1	0	9.24e-05	No mother-daughter relation is found for all the precursor formula.
17	Carnosine	LC-ESI-ITFT (LTQ Orbitrap XL; Thermo Scientfic)	negative	226.107	C9H14N4O3	1	1	2	13	9	0	0.999996	-1	0	-1	-1	-1	-1	8.80362	0.0001827	No mother-daughter relation is found for all the precursor formula.
18	Carnosine	LC-ESI-ITFT	negative	226.107	C9H14N4O3	1	1	2	17	9	0	0.999996	-1	0	-1	-1	-1	-1	7.94054	0.0001596	No mother-daughter relation is found for all the precursor formula.
19	Carnosine	LC-ESI-ITFT	negative	226.107	C9H14N4O3	1	1	2	5	3	0	0.999996	-1	0	-1	-1	-1	-1	37.3609	0.0001137	No mother-daughter relation is found for all the precursor formula.
20	Carnosine	LC-ESI-ITFT	negative	226.107	C9H14N4O3	1	1	2	18	9	1	1.06667	0	1	0.166667	1	1	0.0666667	7.6453	0.0001544	successful ranked
21	Carnosine	LC-ESI-ITFT	positive	226.107	C9H14N4O3	1	1	2	20	17	1	1.03571	0	1	0.125	1	1	0.0357143	8.12117	0.0002496	successful ranked
22	Carnosine	LC-ESI-ITFT	positive	226.107	C9H14N4O3	1	1	2	9	5	0	0.999996	-1	0	-1	-1	-1	-1	22.1625	0.0001188	No mother-daughter relation is found for all the precursor formula.
23	Carnosine	LC-ESI-ITFT	positive	226.107	C9H14N4O3	1	1	2	19	19	0	0.999996	-1	0	-1	-1	-1	-1	8.3379	0.0002187	No mother-daughter relation is found for all the precursor formula.
24	Carnosine	LC-ESI-ITFT	positive	226.107	C9H14N4O3	1	2	2	16	10	1	1.04762	0	0	0.142857	1	0	0	7.77484	0.0001953	successful ranked
25	Adenine	LC-ESI-ITFT (LTQ Orbitrap XL; Thermo Scientfic)	positive	135.054	C5H5N5	1	1	1	67	3	-1	0.999997	-1	-1	-1	-1	-1	-1	4.03017	-1	Single candidate matches with the answer.
26	Adenine	LC-ESI-ITFT (LTQ Orbitrap XL; Thermo Scientfic)	positive	135.054	C5H5N5	1	1	1	70	2	-1	0.999997	-1	-1	-1	-1	-1	-1	4.01186	-1	Single candidate matches with the answer.
27	Adenine	LC-ESI-ITFT (LTQ Orbitrap XL; Thermo Scientfic)	positive	135.054	C5H5N5	1	1	1	6	6	-1	0.999997	-1	-1	-1	-1	-1	-1	7.74715	-1	Single candidate matches with the answer.
28	Adenine	LC-ESI-ITFT	positive	135.054	C5H5N5	1	1	1	6	6	-1	0.999997	-1	-1	-1	-1	-1	-1	7.74715	-1	Single candidate matches with the answer.
29	Adenosine monophosphate	LC-ESI-ITFT (LTQ Orbitrap XL; Thermo Scientfic)	positive	347.063	C10H14N5O7P	1	1	3	249	19	5	1.05833	1	1	0.3125	1	1	0.00833333	4.33416	0.0003953	successful ranked
30	Adenosine monophosphate	LC-ESI-ITFT (LTQ Orbitrap XL; Thermo Scientfic)	positive	347.063	C10H14N5O7P	3	3	3	80	30	0	1.02222	1	1	0	0	0	0	4.02426	0.0005089	successful ranked
31	Adenosine monophosphate	LC-ESI-ITFT (LTQ Orbitrap XL; Thermo Scientfic)	positive	347.063	C10H14N5O7P	1	3	3	5	3	1	1.33333	1	0	0.333333	1	0	0	53.2439	0.0001665	successful ranked
32	Adenosine monophosphate	LC-ESI-ITFT (LTQ Orbitrap XL; Thermo Scientfic)	positive	347.063	C10H14N5O7P	1	2	3	32	20	2	1.02564	0	0	0.153846	1	0	0	7.27633	0.0003941	successful ranked
33	Adenosine monophosphate	LC-ESI-ITFT (LTQ Orbitrap XL; Thermo Scientfic)	positive	347.063	C10H14N5O7P	2	2	3	117	40	9	1.02353	1	1	0.257143	0	1	0.00672269	11.0454	0.000579	successful ranked
34	Adenosine monophosphate	LC-ESI-ITFT (LTQ Orbitrap XL; Thermo Scientfic)	positive	347.063	C10H14N5O7P	1	2	3	14	15	1	1.33333	0	0	0.333333	1	0	0	55.3258	0.000331	successful ranked
35	Adenosine monophosphate	LC-ESI-ITFT (LTQ Orbitrap XL; Thermo Scientfic)	positive	347.063	C10H14N5O7P	1	1	3	5	3	1	2	0	1	0.5	1	1	1	53.2872	0.0001925	successful ranked
36	Adenosine monophosphate	LC-ESI-ITFT (LTQ Orbitrap XL; Thermo Scientfic)	positive	347.063	C10H14N5O7P	2	3	3	7	4	0	2	0	0	0	0	1	1	44.1956	0.0001533	successful ranked
37	Adenosine monophosphate	LC-ESI-ITFT (LTQ Orbitrap XL; Thermo Scientfic)	negative	347.063	C10H14N5O7P	1	1	3	282	37	19	1.08859	1	1	0.513514	1	1	0.045045	4.35649	0.0006108	successful ranked
38	Adenosine monophosphate	LC-ESI-ITFT (LTQ Orbitrap XL; Thermo Scientfic)	negative	347.063	C10H14N5O7P	1	3	3	6	6	1	1.16667	0	0	0.25	1	0	0	49.2989	0.0002006	successful ranked
39	Adenosine monophosphate	LC-ESI-ITFT (LTQ Orbitrap XL; Thermo Scientfic)	negative	347.063	C10H14N5O7P	1	1	3	30	11	1	1.03571	0	1	0.125	1	1	0.0357143	5.30004	0.0002229	successful ranked
40	Adenosine monophosphate	LC-ESI-ITFT (LTQ Orbitrap XL; Thermo Scientfic)	negative	347.063	C10H14N5O7P	1	1	3	5	3	0	0.999998	-1	0	-1	-1	-1	-1	63.0403	0.0001526	No mother-daughter relation is found for all the precursor formula.
41	Adenosine monophosphate	LC-ESI-ITFT (LTQ Orbitrap XL; Thermo Scientfic)	negative	347.063	C10H14N5O7P	1	1	3	142	22	8	1.06667	1	1	0.380952	1	0	0.0238095	21.8299	0.0004091	successful ranked
42	Adenosine monophosphate	LC-ESI-ITFT (LTQ Orbitrap XL; Thermo Scientfic)	negative	347.063	C10H14N5O7P	1	1	3	8	7	0	0.999998	-1	0	-1	-1	-1	-1	31.8472	0.0002191	No mother-daughter relation is found for all the precursor formula.
43	Adenosine monophosphate	LC-ESI-ITFT (LTQ Orbitrap XL; Thermo Scientfic)	negative	347.063	C10H14N5O7P	1	1	3	4	3	0	0.999998	-1	0	-1	-1	-1	-1	70.1521	0.0001377	No mother-daughter relation is found for all the precursor formula.
44	Adenosine monophosphate	LC-ESI-ITFT	negative	347.063	C10H14N5O7P	1	3	3	6	6	1	1.16667	0	0	0.25	1	0	0	49.2989	0.000185	successful ranked
45	Adenosine monophosphate	LC-ESI-ITFT	negative	347.063	C10H14N5O7P	1	1	3	5	3	0	0.999998	-1	0	-1	-1	-1	-1	63.0403	0.0001335	No mother-daughter relation is found for all the precursor formula.
46	Adenosine monophosphate	LC-ESI-ITFT	negative	347.063	C10H14N5O7P	1	1	3	8	7	0	0.999998	-1	0	-1	-1	-1	-1	31.8472	0.0002063	No mother-daughter relation is found for all the precursor formula.
47	Adenosine monophosphate	LC-ESI-ITFT	negative	347.063	C10H14N5O7P	1	1	3	4	3	0	0.999998	-1	0	-1	-1	-1	-1	70.1521	0.0001327	No mother-daughter relation is found for all the precursor formula.
48	Adenosine monophosphate	LC-ESI-ITFT	positive	347.063	C10H14N5O7P	1	3	3	5	3	1	1.33333	1	0	0.333333	1	0	0	53.2439	0.00015	successful ranked
49	Adenosine monophosphate	LC-ESI-ITFT	positive	347.063	C10H14N5O7P	1	2	3	14	15	1	1.33333	0	0	0.333333	1	0	0	55.3258	0.0003581	successful ranked
50	Adenosine monophosphate	LC-ESI-ITFT	positive	347.063	C10H14N5O7P	1	1	3	5	3	1	2	0	1	0.5	1	1	1	53.2872	0.0001938	successful ranked
51	Adenosine monophosphate	LC-ESI-ITFT	positive	347.063	C10H14N5O7P	2	3	3	7	4	0	2	0	0	0	0	1	1	44.1956	0.0001525	successful ranked
52	Adenosine	LC-ESI-ITFT (LTQ Orbitrap XL; Thermo Scientfic)	positive	267.097	C10H13N5O4	1	1	2	77	20	4	1.03333	0	1	0.25	1	1	0.0333333	7.54318	0.000245	successful ranked
53	Adenosine	LC-ESI-ITFT (LTQ Orbitrap XL; Thermo Scientfic)	positive	267.097	C10H13N5O4	1	1	2	5	3	0	0.999995	-1	0	-1	-1	-1	-1	26.3835	0.0001156	No mother-daughter relation is found for all the precursor formula.
54	Adenosine	LC-ESI-ITFT (LTQ Orbitrap XL; Thermo Scientfic)	positive	267.097	C10H13N5O4	1	1	2	3	2	1	2	0	1	0.5	1	1	1	71.0965	0.0013153	successful ranked
55	Adenosine	LC-ESI-ITFT	positive	267.097	C10H13N5O4	1	1	2	34	8	2	1.13333	0	1	0.333333	1	1	0.0666667	8.13878	0.0002138	successful ranked
56	Adenosine	LC-ESI-ITFT	positive	267.097	C10H13N5O4	1	1	2	32	7	2	1.13333	0	1	0.333333	1	1	0.0666667	8.55674	0.000163	successful ranked
57	Adenosine	LC-ESI-ITFT	positive	267.097	C10H13N5O4	1	1	2	20	8	2	1.09524	0	1	0.285714	1	1	0.0952381	16.6775	0.0001714	successful ranked
58	Adenosine	LC-ESI-ITFT	positive	267.097	C10H13N5O4	1	1	2	28	7	2	1.13333	0	1	0.333333	1	1	0.133333	9.71943	0.0001454	successful ranked
59	Adenosine	LC-ESI-ITFT	positive	267.097	C10H13N5O4	1	1	2	5	3	0	0.999995	-1	0	-1	-1	-1	-1	26.3835	0.0001082	No mother-daughter relation is found for all the precursor formula.
60	Adenosine	LC-ESI-ITFT	positive	267.097	C10H13N5O4	1	1	2	3	2	1	2	0	1	0.5	1	1	1	71.0965	0.0001454	successful ranked
61	Androstenedione	LC-ESI-ITFT	positive	286.193	C19H26O2	1	1	2	67	30	29	1.7931	0	1	0.966667	1	1	0.74023	3.63462	0.0004235	successful ranked
62	Androstenedione	LC-ESI-ITFT	positive	286.193	C19H26O2	1	1	2	35	30	29	1.73793	0	1	0.966667	1	1	0.673563	12.9312	0.0004349	successful ranked
63	Androstenedione	LC-ESI-ITFT	positive	286.193	C19H26O2	1	1	2	65	30	29	1.72414	0	1	0.966667	1	1	0.588506	3.50177	0.0004438	successful ranked
64	Androstenedione	LC-ESI-ITFT	positive	286.193	C19H26O2	1	1	2	65	30	29	1.72414	0	1	0.966667	1	1	0.616092	3.66969	0.0004285	successful ranked
65	Cyclic AMP	LC-ESI-ITFT (LTQ Orbitrap XL; Thermo Scientfic)	positive	329.053	C10H12N5O6P	3	3	4	153	32	5	1.03261	1	1	0.208333	0	1	0.00724638	5.09262	0.0006675	successful ranked
66	Cyclic AMP	LC-ESI-ITFT (LTQ Orbitrap XL; Thermo Scientfic)	positive	329.053	C10H12N5O6P	1	1	4	6	2	0	0.999999	-1	0	-1	-1	-1	-1	47.3179	0	No mother-daughter relation is found for all the precursor formula.
67	Cyclic AMP	LC-ESI-ITFT (LTQ Orbitrap XL; Thermo Scientfic)	positive	329.053	C10H12N5O6P	3	4	4	26	12	0	1.10714	0	0	0	0	0	0	7.02044	0.0004638	successful ranked
68	Cyclic AMP	LC-ESI-ITFT (LTQ Orbitrap XL; Thermo Scientfic)	positive	329.053	C10H12N5O6P	2	2	4	36	19	1	1.05128	0	1	0.0769231	0	1	0.0384615	6.81991	0.0004262	successful ranked
69	Cyclic AMP	LC-ESI-ITFT (LTQ Orbitrap XL; Thermo Scientfic)	positive	329.053	C10H12N5O6P	3	3	4	141	61	8	1.02551	1	1	0.163265	0	1	0.0102041	6.08752	0.0009687	successful ranked
70	Cyclic AMP	LC-ESI-ITFT (LTQ Orbitrap XL; Thermo Scientfic)	positive	329.053	C10H12N5O6P	1	1	4	26	13	3	1.08889	0	1	0.3	1	0	0.0222222	7.16137	0.0003606	successful ranked
71	Cyclic AMP	LC-ESI-ITFT (LTQ Orbitrap XL; Thermo Scientfic)	positive	329.053	C10H12N5O6P	1	1	4	33	16	1	1.04762	0	1	0.142857	1	1	0.047619	6.99184	0.0004657	successful ranked
72	Cyclic AMP	LC-ESI-ITFT (LTQ Orbitrap XL; Thermo Scientfic)	positive	329.053	C10H12N5O6P	1	1	4	7	6	0	0.999999	-1	0	-1	-1	-1	-1	20.7409	0.0002279	No mother-daughter relation is found for all the precursor formula.
73	Cyclic AMP	LC-ESI-ITFT (LTQ Orbitrap XL; Thermo Scientfic)	negative	329.053	C10H12N5O6P	1	1	4	149	13	5	1.08974	1	1	0.384615	0	1	0.0128205	11.7868	0.0004559	successful ranked
74	Cyclic AMP	LC-ESI-ITFT (LTQ Orbitrap XL; Thermo Scientfic)	negative	329.053	C10H12N5O6P	4	4	4	3	4	1	1.66667	1	1	0.25	0	0	0	100.039	0.0002708	successful ranked
75	Cyclic AMP	LC-ESI-ITFT (LTQ Orbitrap XL; Thermo Scientfic)	negative	329.053	C10H12N5O6P	2	4	4	6	4	0	2	0	0	0	0	1	1	49.1856	0.0002212	successful ranked
76	Cyclic AMP	LC-ESI-ITFT (LTQ Orbitrap XL; Thermo Scientfic)	negative	329.053	C10H12N5O6P	2	2	4	137	15	5	1.08791	1	1	0.357143	0	1	0.021978	18.0207	0.0004339	successful ranked
77	Cyclic AMP	LC-ESI-ITFT (LTQ Orbitrap XL; Thermo Scientfic)	negative	329.053	C10H12N5O6P	1	1	4	3	4	0	0.999999	-1	0	-1	-1	-1	-1	100.192	0	No mother-daughter relation is found for all the precursor formula.
78	Cyclic AMP	LC-ESI-ITFT (LTQ Orbitrap XL; Thermo Scientfic)	negative	329.053	C10H12N5O6P	1	3	4	7	4	1	1.33333	0	0	0.333333	1	0	0	46.0866	0.0003133	successful ranked
79	Cyclic AMP	LC-ESI-ITFT	negative	329.053	C10H12N5O6P	4	4	4	3	4	1	1.66667	1	1	0.25	0	0	0	100.039	0.0002573	successful ranked
80	Cyclic AMP	LC-ESI-ITFT	negative	329.053	C10H12N5O6P	2	4	4	6	4	0	2	0	0	0	0	1	1	49.1856	0.0002102	successful ranked
81	Cyclic AMP	LC-ESI-ITFT	negative	329.053	C10H12N5O6P	1	1	4	3	4	0	0.999999	-1	0	-1	-1	-1	-1	100.192	0	No mother-daughter relation is found for all the precursor formula.
82	Cyclic AMP	LC-ESI-ITFT	negative	329.053	C10H12N5O6P	1	3	4	7	4	1	1.33333	0	0	0.333333	1	0	0	46.0866	0.0002818	successful ranked
83	Cyclic AMP	LC-ESI-ITFT	positive	329.053	C10H12N5O6P	1	1	4	6	2	0	0.999999	-1	0	-1	-1	-1	-1	47.3179	0	No mother-daughter relation is found for all the precursor formula.
84	Cyclic AMP	LC-ESI-ITFT	positive	329.053	C10H12N5O6P	3	4	4	26	12	0	1.10714	0	0	0	0	0	0	7.02044	0.0004321	successful ranked
85	Cyclic AMP	LC-ESI-ITFT	positive	329.053	C10H12N5O6P	2	2	4	36	19	1	1.05128	0	1	0.0769231	0	1	0.0384615	6.81991	0.0004009	successful ranked
86	Cyclic AMP	LC-ESI-ITFT	positive	329.053	C10H12N5O6P	1	1	4	26	12	3	1.11111	0	1	0.333333	1	1	0.0555556	7.16137	0.0003789	successful ranked
87	Cyclic AMP	LC-ESI-ITFT	positive	329.053	C10H12N5O6P	1	1	4	33	14	1	1.04762	0	1	0.142857	1	1	0.047619	6.99184	0.0004009	successful ranked
88	Cyclic AMP	LC-ESI-ITFT	positive	329.053	C10H12N5O6P	1	1	4	7	6	0	0.999999	-1	0	-1	-1	-1	-1	20.7409	0.00022	No mother-daughter relation is found for all the precursor formula.
89	Creatine	LC-ESI-ITFT (LTQ Orbitrap XL; Thermo Scientfic)	positive	131.069	C4H9N3O2	1	1	1	91	7	-1	0.999997	-1	-1	-1	-1	-1	-1	2.35012	-1	Single candidate matches with the answer.
90	Creatine	LC-ESI-ITFT (LTQ Orbitrap XL; Thermo Scientfic)	positive	131.069	C4H9N3O2	1	1	1	5	4	-1	0.999997	-1	-1	-1	-1	-1	-1	10.8832	-1	Single candidate matches with the answer.
91	Creatine	LC-ESI-ITFT (LTQ Orbitrap XL; Thermo Scientfic)	positive	131.069	C4H9N3O2	1	1	1	5	4	-1	0.999997	-1	-1	-1	-1	-1	-1	10.7285	-1	Single candidate matches with the answer.
92	Creatine	LC-ESI-ITFT (LTQ Orbitrap XL; Thermo Scientfic)	positive	131.069	C4H9N3O2	1	1	1	3	2	-1	0.999997	-1	-1	-1	-1	-1	-1	29.5285	-1	Single candidate matches with the answer.
93	Creatine	LC-ESI-ITFT (LTQ Orbitrap XL; Thermo Scientfic)	positive	131.069	C4H9N3O2	1	1	1	77	5	-1	0.999997	-1	-1	-1	-1	-1	-1	3.39222	-1	Single candidate matches with the answer.
94	Creatine	LC-ESI-ITFT (LTQ Orbitrap XL; Thermo Scientfic)	positive	131.069	C4H9N3O2	1	1	1	5	4	-1	0.999997	-1	-1	-1	-1	-1	-1	10.7552	-1	Single candidate matches with the answer.
95	Creatine	LC-ESI-ITFT (LTQ Orbitrap XL; Thermo Scientfic)	positive	131.069	C4H9N3O2	1	1	1	7	7	-1	0.999997	-1	-1	-1	-1	-1	-1	9.12479	-1	Single candidate matches with the answer.
96	Creatine	LC-ESI-ITFT (LTQ Orbitrap XL; Thermo Scientfic)	positive	131.069	C4H9N3O2	1	1	1	5	2	-1	0.999997	-1	-1	-1	-1	-1	-1	29.6489	-1	Single candidate matches with the answer.
97	Creatine	LC-ESI-ITFT (LTQ Orbitrap XL; Thermo Scientfic)	negative	131.069	C4H9N3O2	1	1	1	604	10	-1	0.999997	-1	-1	-1	-1	-1	-1	1.49127	-1	Single candidate matches with the answer.
98	Creatine	LC-ESI-ITFT (LTQ Orbitrap XL; Thermo Scientfic)	negative	131.069	C4H9N3O2	1	1	1	568	6	-1	0.999997	-1	-1	-1	-1	-1	-1	3.26732	-1	Single candidate matches with the answer.
99	Creatine	LC-ESI-ITFT (LTQ Orbitrap XL; Thermo Scientfic)	negative	131.069	C4H9N3O2	1	1	1	3	2	-1	0.999997	-1	-1	-1	-1	-1	-1	29.7031	-1	Single candidate matches with the answer.
100	Creatine	LC-ESI-ITFT	negative	131.069	C4H9N3O2	1	1	1	3	2	-1	0.999997	-1	-1	-1	-1	-1	-1	29.7031	-1	Single candidate matches with the answer.
101	Creatine	LC-ESI-ITFT	positive	131.069	C4H9N3O2	1	1	1	5	4	-1	0.999997	-1	-1	-1	-1	-1	-1	10.7285	-1	Single candidate matches with the answer.
102	Creatine	LC-ESI-ITFT	positive	131.069	C4H9N3O2	1	1	1	3	2	-1	0.999997	-1	-1	-1	-1	-1	-1	29.5285	-1	Single candidate matches with the answer.
103	Creatine	LC-ESI-ITFT	positive	131.069	C4H9N3O2	1	1	1	5	4	-1	0.999997	-1	-1	-1	-1	-1	-1	10.7552	-1	Single candidate matches with the answer.
104	Creatine	LC-ESI-ITFT	positive	131.069	C4H9N3O2	1	1	1	7	6	-1	0.999997	-1	-1	-1	-1	-1	-1	9.12479	-1	Single candidate matches with the answer.
105	Creatine	LC-ESI-ITFT	positive	131.069	C4H9N3O2	1	1	1	5	2	-1	0.999997	-1	-1	-1	-1	-1	-1	29.6489	-1	Single candidate matches with the answer.
106	cis-Aconitic acid	LC-ESI-ITFT (LTQ Orbitrap XL; Thermo Scientfic)	negative	174.016	C6H6O6	1	1	1	453	33	-1	0.999998	-1	-1	-1	-1	-1	-1	0.976228	-1	Single candidate matches with the answer.
107	cis-Aconitic acid	LC-ESI-ITFT (LTQ Orbitrap XL; Thermo Scientfic)	negative	174.016	C6H6O6	1	1	1	3	4	-1	0.999998	-1	-1	-1	-1	-1	-1	13.3465	-1	Single candidate matches with the answer.
108	cis-Aconitic acid	LC-ESI-ITFT (LTQ Orbitrap XL; Thermo Scientfic)	negative	174.016	C6H6O6	1	1	1	530	32	-1	0.999998	-1	-1	-1	-1	-1	-1	0.982715	-1	Single candidate matches with the answer.
109	cis-Aconitic acid	LC-ESI-ITFT (LTQ Orbitrap XL; Thermo Scientfic)	negative	174.016	C6H6O6	1	1	1	3	4	-1	0.999998	-1	-1	-1	-1	-1	-1	13.333	-1	Single candidate matches with the answer.
110	cis-Aconitic acid	LC-ESI-ITFT (LTQ Orbitrap XL; Thermo Scientfic)	negative	174.016	C6H6O6	1	1	1	8	2	-1	0.999998	-1	-1	-1	-1	-1	-1	0	-1	Single candidate matches with the answer.
111	cis-Aconitic acid	LC-ESI-ITFT	negative	174.016	C6H6O6	1	1	1	3	4	-1	0.999998	-1	-1	-1	-1	-1	-1	13.3465	-1	Single candidate matches with the answer.
112	cis-Aconitic acid	LC-ESI-ITFT	negative	174.016	C6H6O6	1	1	1	3	4	-1	0.999998	-1	-1	-1	-1	-1	-1	13.333	-1	Single candidate matches with the answer.
113	cis-Aconitic acid	LC-ESI-ITFT	negative	174.016	C6H6O6	1	1	1	8	2	-1	0.999998	-1	-1	-1	-1	-1	-1	0	-1	Single candidate matches with the answer.
114	Citric acid	LC-ESI-ITFT (LTQ Orbitrap XL; Thermo Scientfic)	negative	192.027	C6H8O7	1	1	1	568	35	-1	0.999998	-1	-1	-1	-1	-1	-1	0.933329	-1	Single candidate matches with the answer.
115	Citric acid	LC-ESI-ITFT (LTQ Orbitrap XL; Thermo Scientfic)	negative	192.027	C6H8O7	1	1	1	11	6	-1	0.999998	-1	-1	-1	-1	-1	-1	8.11219	-1	Single candidate matches with the answer.
116	Citric acid	LC-ESI-ITFT (LTQ Orbitrap XL; Thermo Scientfic)	negative	192.027	C6H8O7	1	1	1	8	1	-1	0.999998	-1	-1	-1	-1	-1	-1	0	-1	Single candidate matches with the answer.
117	Citric acid	LC-ESI-ITFT (LTQ Orbitrap XL; Thermo Scientfic)	negative	192.027	C6H8O7	1	1	1	527	33	-1	0.999998	-1	-1	-1	-1	-1	-1	0.766948	-1	Single candidate matches with the answer.
118	Citric acid	LC-ESI-ITFT (LTQ Orbitrap XL; Thermo Scientfic)	negative	192.027	C6H8O7	1	1	1	9	5	-1	0.999998	-1	-1	-1	-1	-1	-1	7.49111	-1	Single candidate matches with the answer.
119	Citric acid	LC-ESI-ITFT (LTQ Orbitrap XL; Thermo Scientfic)	negative	192.027	C6H8O7	1	1	1	5	2	-1	0.999998	-1	-1	-1	-1	-1	-1	0	-1	Single candidate matches with the answer.
120	Citric acid	LC-ESI-ITFT	negative	192.027	C6H8O7	1	1	1	11	6	-1	0.999998	-1	-1	-1	-1	-1	-1	8.11219	-1	Single candidate matches with the answer.
121	Citric acid	LC-ESI-ITFT	negative	192.027	C6H8O7	1	1	1	9	5	-1	0.999998	-1	-1	-1	-1	-1	-1	7.49111	-1	Single candidate matches with the answer.
122	gamma-Aminobutyric acid	LC-ESI-ITFT (LTQ Orbitrap XL; Thermo Scientfic)	positive	103.063	C4H9NO2	1	1	1	75	1	-1	0.424103	-1	-1	-1	-1	-1	-1	0.0427378	-1	Single candidate matches with the answer.
123	gamma-Aminobutyric acid	LC-ESI-ITFT (LTQ Orbitrap XL; Thermo Scientfic)	positive	103.063	C4H9NO2	1	1	1	4	2	-1	0.999998	-1	-1	-1	-1	-1	-1	7.63801	-1	Single candidate matches with the answer.
124	gamma-Aminobutyric acid	LC-ESI-ITFT (LTQ Orbitrap XL; Thermo Scientfic)	positive	103.063	C4H9NO2	1	1	1	3	4	-1	0.999998	-1	-1	-1	-1	-1	-1	14.1101	-1	Single candidate matches with the answer.
125	gamma-Aminobutyric acid	LC-ESI-ITFT (LTQ Orbitrap XL; Thermo Scientfic)	positive	103.063	C4H9NO2	1	1	1	6	1	-1	0.999998	-1	-1	-1	-1	-1	-1	0	-1	Single candidate matches with the answer.
126	gamma-Aminobutyric acid	LC-ESI-ITFT (LTQ Orbitrap XL; Thermo Scientfic)	positive	103.063	C4H9NO2	1	1	1	100	4	-1	0.999998	-1	-1	-1	-1	-1	-1	0.454775	-1	Single candidate matches with the answer.
127	gamma-Aminobutyric acid	LC-ESI-ITFT (LTQ Orbitrap XL; Thermo Scientfic)	positive	103.063	C4H9NO2	1	1	1	3	3	-1	0.999998	-1	-1	-1	-1	-1	-1	9.28795	-1	Single candidate matches with the answer.
128	gamma-Aminobutyric acid	LC-ESI-ITFT (LTQ Orbitrap XL; Thermo Scientfic)	positive	103.063	C4H9NO2	1	1	1	23	7	-1	0.999998	-1	-1	-1	-1	-1	-1	3.30491	-1	Single candidate matches with the answer.
129	gamma-Aminobutyric acid	LC-ESI-ITFT (LTQ Orbitrap XL; Thermo Scientfic)	positive	103.063	C4H9NO2	1	1	1	4	1	-1	0.999998	-1	-1	-1	-1	-1	-1	0	-1	Single candidate matches with the answer.
130	gamma-Aminobutyric acid	LC-ESI-ITFT	positive	103.063	C4H9NO2	1	1	1	4	2	-1	0.999998	-1	-1	-1	-1	-1	-1	7.63801	-1	Single candidate matches with the answer.
131	gamma-Aminobutyric acid	LC-ESI-ITFT	positive	103.063	C4H9NO2	1	1	1	3	4	-1	0.999998	-1	-1	-1	-1	-1	-1	14.1101	-1	Single candidate matches with the answer.
132	gamma-Aminobutyric acid	LC-ESI-ITFT	positive	103.063	C4H9NO2	1	1	1	3	3	-1	0.999998	-1	-1	-1	-1	-1	-1	9.28795	-1	Single candidate matches with the answer.
133	Glutathione	LC-ESI-ITFT (LTQ Orbitrap XL; Thermo Scientfic)	positive	307.084	C10H17N3O6S	1	1	3	87	27	10	1.1413	1	1	0.416667	1	1	0.105072	8.63235	0.0005762	successful ranked
134	Glutathione	LC-ESI-ITFT (LTQ Orbitrap XL; Thermo Scientfic)	positive	307.084	C10H17N3O6S	1	1	3	17	11	2	1.07143	0	1	0.25	1	1	0.0714286	7.59367	0.0003354	successful ranked
135	Glutathione	LC-ESI-ITFT (LTQ Orbitrap XL; Thermo Scientfic)	positive	307.084	C10H17N3O6S	1	1	3	28	18	3	1.03846	0	1	0.230769	1	1	0.0128205	7.99718	0.0004557	successful ranked
136	Glutathione	LC-ESI-ITFT (LTQ Orbitrap XL; Thermo Scientfic)	positive	307.084	C10H17N3O6S	1	1	3	31	12	3	1.10714	0	1	0.375	1	1	0.0714286	10.8797	0.000512	successful ranked
137	Glutathione	LC-ESI-ITFT (LTQ Orbitrap XL; Thermo Scientfic)	positive	307.084	C10H17N3O6S	1	1	3	134	22	5	1.1	1	1	0.3125	0	1	0.025	5.88326	0.0004843	successful ranked
138	Glutathione	LC-ESI-ITFT (LTQ Orbitrap XL; Thermo Scientfic)	positive	307.084	C10H17N3O6S	1	1	3	91	30	2	1.02857	0	1	0.133333	1	1	0.0190476	3.79173	0.0005615	successful ranked
139	Glutathione	LC-ESI-ITFT (LTQ Orbitrap XL; Thermo Scientfic)	positive	307.084	C10H17N3O6S	2	2	3	58	20	2	1.05455	0	1	0.181818	1	0	0.0181818	4.48314	0.0003927	successful ranked
140	Glutathione	LC-ESI-ITFT (LTQ Orbitrap XL; Thermo Scientfic)	positive	307.084	C10H17N3O6S	1	1	3	31	14	2	1.0303	0	1	0.166667	1	1	0.0151515	7.94072	0.0002872	successful ranked
141	Glutathione	LC-ESI-ITFT (LTQ Orbitrap XL; Thermo Scientfic)	negative	307.084	C10H17N3O6S	1	1	3	204	38	29	1.35989	0	1	0.763158	1	1	0.278805	3.57099	0.0006626	successful ranked
142	Glutathione	LC-ESI-ITFT (LTQ Orbitrap XL; Thermo Scientfic)	negative	307.084	C10H17N3O6S	2	3	3	32	20	0	1.08333	0	0	0	0	1	0.0833333	5.02888	0.0004271	successful ranked
143	Glutathione	LC-ESI-ITFT (LTQ Orbitrap XL; Thermo Scientfic)	negative	307.084	C10H17N3O6S	1	1	3	38	29	5	1.0303	0	1	0.227273	1	1	0.017316	5.03372	0.0004338	successful ranked
144	Glutathione	LC-ESI-ITFT (LTQ Orbitrap XL; Thermo Scientfic)	negative	307.084	C10H17N3O6S	1	1	3	7	6	0	0.999995	-1	0	-1	-1	-1	-1	17.7164	0.0002089	No mother-daughter relation is found for all the precursor formula.
145	Glutathione	LC-ESI-ITFT (LTQ Orbitrap XL; Thermo Scientfic)	negative	307.084	C10H17N3O6S	1	1	3	196	37	24	1.24324	0	1	0.648649	1	1	0.175676	4.03897	0.0005904	successful ranked
146	Glutathione	LC-ESI-ITFT (LTQ Orbitrap XL; Thermo Scientfic)	negative	307.084	C10H17N3O6S	1	2	3	36	20	1	1.01515	0	0	0.0833333	1	0	0	4.72617	0.0004253	successful ranked
147	Glutathione	LC-ESI-ITFT (LTQ Orbitrap XL; Thermo Scientfic)	negative	307.084	C10H17N3O6S	1	1	3	29	13	1	1.06667	0	1	0.166667	1	1	0.0666667	5.73291	0.0002538	successful ranked
148	Glutathione	LC-ESI-ITFT (LTQ Orbitrap XL; Thermo Scientfic)	negative	307.084	C10H17N3O6S	1	1	3	36	16	0	0.999995	-1	0	-1	-1	-1	-1	5.13225	0.0002849	No mother-daughter relation is found for all the precursor formula.
149	Glutathione	LC-ESI-ITFT	negative	307.084	C10H17N3O6S	2	3	3	32	20	0	1.08333	0	0	0	0	1	0.0833333	5.02888	0.0003785	successful ranked
150	Glutathione	LC-ESI-ITFT	negative	307.084	C10H17N3O6S	1	1	3	38	29	5	1.0303	0	1	0.227273	1	1	0.017316	5.03372	0.0004395	successful ranked
151	Glutathione	LC-ESI-ITFT	negative	307.084	C10H17N3O6S	1	1	3	7	6	0	0.999995	-1	0	-1	-1	-1	-1	17.7164	0.0002044	No mother-daughter relation is found for all the precursor formula.
152	Glutathione	LC-ESI-ITFT	positive	307.084	C10H17N3O6S	1	1	3	17	11	2	1.07143	0	1	0.25	1	1	0.0714286	7.59367	0.0002429	successful ranked
153	Glutathione	LC-ESI-ITFT	positive	307.084	C10H17N3O6S	1	1	3	28	18	3	1.03846	0	1	0.230769	1	1	0.0128205	7.99718	0.0003288	successful ranked
154	Glutathione	LC-ESI-ITFT	positive	307.084	C10H17N3O6S	1	1	3	31	12	3	1.10714	0	1	0.375	1	1	0.0714286	10.8797	0.0003064	successful ranked
155	Glycerol 3-phosphate	LC-ESI-ITFT (LTQ Orbitrap XL; Thermo Scientfic)	positive	172.014	C3H9O6P	1	1	1	699	30	-1	1	-1	-1	-1	-1	-1	-1	0.500133	-1	Single candidate matches with the answer.
156	Glycerol 3-phosphate	LC-ESI-ITFT (LTQ Orbitrap XL; Thermo Scientfic)	positive	172.014	C3H9O6P	1	1	1	26	11	-1	1	-1	-1	-1	-1	-1	-1	4.21116	-1	Single candidate matches with the answer.
157	Glycerol 3-phosphate	LC-ESI-ITFT (LTQ Orbitrap XL; Thermo Scientfic)	positive	172.014	C3H9O6P	1	1	1	22	6	-1	1	-1	-1	-1	-1	-1	-1	4.80008	-1	Single candidate matches with the answer.
158	Glycerol 3-phosphate	LC-ESI-ITFT (LTQ Orbitrap XL; Thermo Scientfic)	positive	172.014	C3H9O6P	1	1	1	13	4	-1	1	-1	-1	-1	-1	-1	-1	10.1207	-1	Single candidate matches with the answer.
159	Glycerol 3-phosphate	LC-ESI-ITFT (LTQ Orbitrap XL; Thermo Scientfic)	positive	172.014	C3H9O6P	1	1	1	386	42	-1	1	-1	-1	-1	-1	-1	-1	0.775232	-1	Single candidate matches with the answer.
160	Glycerol 3-phosphate	LC-ESI-ITFT (LTQ Orbitrap XL; Thermo Scientfic)	positive	172.014	C3H9O6P	1	1	1	22	7	-1	1	-1	-1	-1	-1	-1	-1	5.27284	-1	Single candidate matches with the answer.
161	Glycerol 3-phosphate	LC-ESI-ITFT (LTQ Orbitrap XL; Thermo Scientfic)	positive	172.014	C3H9O6P	1	1	1	17	5	-1	1	-1	-1	-1	-1	-1	-1	5.67184	-1	Single candidate matches with the answer.
162	Glycerol 3-phosphate	LC-ESI-ITFT (LTQ Orbitrap XL; Thermo Scientfic)	positive	172.014	C3H9O6P	1	1	1	17	4	-1	1	-1	-1	-1	-1	-1	-1	10.1197	-1	Single candidate matches with the answer.
163	Glycerol 3-phosphate	LC-ESI-ITFT (LTQ Orbitrap XL; Thermo Scientfic)	negative	172.014	C3H9O6P	1	1	1	520	38	-1	1	-1	-1	-1	-1	-1	-1	0.97293	-1	Single candidate matches with the answer.
164	Glycerol 3-phosphate	LC-ESI-ITFT (LTQ Orbitrap XL; Thermo Scientfic)	negative	172.014	C3H9O6P	1	1	1	3	4	-1	1	-1	-1	-1	-1	-1	-1	20.6152	-1	Single candidate matches with the answer.
165	Glycerol 3-phosphate	LC-ESI-ITFT (LTQ Orbitrap XL; Thermo Scientfic)	negative	172.014	C3H9O6P	1	1	1	5	2	-1	1	-1	-1	-1	-1	-1	-1	0	-1	Single candidate matches with the answer.
166	Glycerol 3-phosphate	LC-ESI-ITFT (LTQ Orbitrap XL; Thermo Scientfic)	negative	172.014	C3H9O6P	1	1	1	570	33	-1	1	-1	-1	-1	-1	-1	-1	2.11952	-1	Single candidate matches with the answer.
167	Glycerol 3-phosphate	LC-ESI-ITFT (LTQ Orbitrap XL; Thermo Scientfic)	negative	172.014	C3H9O6P	1	1	1	3	4	-1	1	-1	-1	-1	-1	-1	-1	22.0019	-1	Single candidate matches with the answer.
168	Glycerol 3-phosphate	LC-ESI-ITFT (LTQ Orbitrap XL; Thermo Scientfic)	negative	172.014	C3H9O6P	1	1	1	4	2	-1	1	-1	-1	-1	-1	-1	-1	0	-1	Single candidate matches with the answer.
169	Glycerol 3-phosphate	LC-ESI-ITFT (LTQ Orbitrap XL; Thermo Scientfic)	negative	172.014	C3H9O6P	1	1	1	13	2	-1	1	-1	-1	-1	-1	-1	-1	0	-1	Single candidate matches with the answer.
170	Glycerol 3-phosphate	LC-ESI-ITFT	negative	172.014	C3H9O6P	1	1	1	3	4	-1	1	-1	-1	-1	-1	-1	-1	22.0019	-1	Single candidate matches with the answer.
171	Guanine	LC-ESI-ITFT (LTQ Orbitrap XL; Thermo Scientfic)	positive	151.049	C5H5N5O	1	1	2	143	9	1	1.02778	0	1	0.111111	1	1	0.0277778	3.12322	0.0001773	successful ranked
172	Guanine	LC-ESI-ITFT (LTQ Orbitrap XL; Thermo Scientfic)	positive	151.049	C5H5N5O	1	1	2	8	9	0	0.999997	-1	0	-1	-1	-1	-1	6.23218	0.0001778	No mother-daughter relation is found for all the precursor formula.
173	Guanine	LC-ESI-ITFT (LTQ Orbitrap XL; Thermo Scientfic)	positive	151.049	C5H5N5O	1	1	2	10	7	0	0.999997	-1	0	-1	-1	-1	-1	6.37216	0.0001616	No mother-daughter relation is found for all the precursor formula.
174	Guanine	LC-ESI-ITFT (LTQ Orbitrap XL; Thermo Scientfic)	positive	151.049	C5H5N5O	1	1	2	7	3	0	0.999997	-1	0	-1	-1	-1	-1	6.28799	0	No mother-daughter relation is found for all the precursor formula.
175	Guanine	LC-ESI-ITFT (LTQ Orbitrap XL; Thermo Scientfic)	positive	151.049	C5H5N5O	1	1	2	145	11	1	1.06667	0	1	0.166667	1	1	0.0666667	2.19702	0.0002134	successful ranked
176	Guanine	LC-ESI-ITFT (LTQ Orbitrap XL; Thermo Scientfic)	positive	151.049	C5H5N5O	1	1	2	6	5	0	0.999997	-1	0	-1	-1	-1	-1	11.3051	0.0001277	No mother-daughter relation is found for all the precursor formula.
177	Guanine	LC-ESI-ITFT (LTQ Orbitrap XL; Thermo Scientfic)	positive	151.049	C5H5N5O	1	1	2	3	2	0	0.999997	-1	0	-1	-1	-1	-1	0	0.0001312	No mother-daughter relation is found for all the precursor formula.
178	Guanine	LC-ESI-ITFT (LTQ Orbitrap XL; Thermo Scientfic)	negative	151.049	C5H5N5O	1	1	2	471	30	6	1.03667	0	1	0.24	1	1	0.0333333	2.077	0.0003482	successful ranked
179	Guanine	LC-ESI-ITFT (LTQ Orbitrap XL; Thermo Scientfic)	negative	151.049	C5H5N5O	1	1	2	6	4	0	0.999997	-1	0	-1	-1	-1	-1	10.1938	0.0001424	No mother-daughter relation is found for all the precursor formula.
180	Guanine	LC-ESI-ITFT (LTQ Orbitrap XL; Thermo Scientfic)	negative	151.049	C5H5N5O	1	1	2	18	8	0	0.999997	-1	0	-1	-1	-1	-1	5.00508	0.0001457	No mother-daughter relation is found for all the precursor formula.
181	Guanine	LC-ESI-ITFT	negative	151.049	C5H5N5O	1	1	2	6	6	4	1.26667	0	1	0.666667	1	1	0.2	10.1795	0.0001696	successful ranked
182	Guanine	LC-ESI-ITFT	negative	151.049	C5H5N5O	1	1	2	6	4	0	0.999997	-1	0	-1	-1	-1	-1	10.1938	0.0001225	No mother-daughter relation is found for all the precursor formula.
183	Guanine	LC-ESI-ITFT	positive	151.049	C5H5N5O	1	1	2	7	7	4	1.19048	0	1	0.571429	1	1	0.142857	7.70756	0.0001614	successful ranked
184	Guanine	LC-ESI-ITFT	positive	151.049	C5H5N5O	1	1	2	8	9	0	0.999997	-1	0	-1	-1	-1	-1	6.23218	0.0001534	No mother-daughter relation is found for all the precursor formula.
185	Guanine	LC-ESI-ITFT	positive	151.049	C5H5N5O	1	1	2	10	5	0	0.999997	-1	0	-1	-1	-1	-1	6.37216	0.0001315	No mother-daughter relation is found for all the precursor formula.
186	Guanine	LC-ESI-ITFT	positive	151.049	C5H5N5O	1	1	2	6	5	0	0.999997	-1	0	-1	-1	-1	-1	11.3051	0.0001318	No mother-daughter relation is found for all the precursor formula.
187	Guanine	LC-ESI-ITFT	positive	151.049	C5H5N5O	1	1	2	3	2	0	0.999997	-1	0	-1	-1	-1	-1	0	0.0001252	No mother-daughter relation is found for all the precursor formula.
188	Guanosine	LC-ESI-ITFT (LTQ Orbitrap XL; Thermo Scientfic)	positive	283.092	C10H13N5O5	1	1	2	214	26	11	1.08667	0	1	0.44	1	0	0.01	3.36749	0.0003683	successful ranked
189	Guanosine	LC-ESI-ITFT (LTQ Orbitrap XL; Thermo Scientfic)	positive	283.092	C10H13N5O5	1	1	2	13	10	1	1.16667	0	1	0.25	1	1	0.166667	35.5417	0.000219	successful ranked
190	Guanosine	LC-ESI-ITFT (LTQ Orbitrap XL; Thermo Scientfic)	positive	283.092	C10H13N5O5	1	1	2	6	6	0	0.999995	-1	0	-1	-1	-1	-1	38.7971	0.0001477	No mother-daughter relation is found for all the precursor formula.
191	Guanosine	LC-ESI-ITFT (LTQ Orbitrap XL; Thermo Scientfic)	positive	283.092	C10H13N5O5	1	1	2	3	2	1	2	0	1	0.5	1	1	1	71.0524	0.000171	successful ranked
192	Guanosine	LC-ESI-ITFT (LTQ Orbitrap XL; Thermo Scientfic)	positive	283.092	C10H13N5O5	1	1	2	121	58	20	1.02367	0	1	0.4	1	1	0.00408163	6.3913	0.0005844	successful ranked
193	Guanosine	LC-ESI-ITFT (LTQ Orbitrap XL; Thermo Scientfic)	positive	283.092	C10H13N5O5	1	1	2	13	10	0	0.999995	-1	0	-1	-1	-1	-1	35.316	0.0001656	No mother-daughter relation is found for all the precursor formula.
194	Guanosine	LC-ESI-ITFT (LTQ Orbitrap XL; Thermo Scientfic)	positive	283.092	C10H13N5O5	1	1	2	15	15	1	1.06667	0	1	0.166667	1	1	0.0666667	14.5483	0.0002262	successful ranked
195	Guanosine	LC-ESI-ITFT (LTQ Orbitrap XL; Thermo Scientfic)	negative	283.092	C10H13N5O5	1	1	2	388	38	22	1.13968	0	1	0.611111	1	1	0.0444444	2.75949	0.0004816	successful ranked
196	Guanosine	LC-ESI-ITFT (LTQ Orbitrap XL; Thermo Scientfic)	negative	283.092	C10H13N5O5	1	1	2	17	10	1	1.33333	0	1	0.333333	1	1	0.333333	24.1419	0.0002106	successful ranked
197	Guanosine	LC-ESI-ITFT (LTQ Orbitrap XL; Thermo Scientfic)	negative	283.092	C10H13N5O5	1	2	2	4	3	1	1.33333	0	0	0.333333	1	0	0	59.7186	0.0001249	successful ranked
198	Guanosine	LC-ESI-ITFT (LTQ Orbitrap XL; Thermo Scientfic)	negative	283.092	C10H13N5O5	2	2	2	10	8	0	1.1	0	1	0	0	1	0.1	21.9722	0.0001813	successful ranked
199	Guanosine	LC-ESI-ITFT (LTQ Orbitrap XL; Thermo Scientfic)	negative	283.092	C10H13N5O5	1	1	2	238	19	10	1.1634	0	1	0.555556	1	1	0.0915033	7.57054	0.0002994	successful ranked
200	Guanosine	LC-ESI-ITFT (LTQ Orbitrap XL; Thermo Scientfic)	negative	283.092	C10H13N5O5	2	2	2	5	5	0	1.33333	0	1	0	0	1	0.333333	58.0961	0.0001536	successful ranked
201	Guanosine	LC-ESI-ITFT (LTQ Orbitrap XL; Thermo Scientfic)	negative	283.092	C10H13N5O5	1	1	2	4	3	1	1.33333	0	1	0.333333	1	1	0.333333	59.7345	0.000107	successful ranked
202	Guanosine	LC-ESI-ITFT	negative	283.092	C10H13N5O5	1	2	2	4	3	1	1.33333	0	0	0.333333	1	0	0	59.7186	0.00011	successful ranked
203	Guanosine	LC-ESI-ITFT	negative	283.092	C10H13N5O5	2	2	2	5	5	0	1.33333	0	1	0	0	1	0.333333	58.0961	0.0001414	successful ranked
204	Guanosine	LC-ESI-ITFT	negative	283.092	C10H13N5O5	1	1	2	4	3	1	1.33333	0	1	0.333333	1	1	0.333333	59.7345	9.79e-05	successful ranked
205	Guanosine	LC-ESI-ITFT	positive	283.092	C10H13N5O5	1	1	2	3	2	1	2	0	1	0.5	1	1	1	71.0524	0.0001615	successful ranked
206	Guanosine	LC-ESI-ITFT	positive	283.092	C10H13N5O5	1	1	2	13	10	0	0.999995	-1	0	-1	-1	-1	-1	35.316	0.0001616	No mother-daughter relation is found for all the precursor formula.
207	Guanosine	LC-ESI-ITFT	positive	283.092	C10H13N5O5	1	1	2	15	14	1	1.06667	0	1	0.166667	1	1	0.0666667	14.5483	0.0001906	successful ranked
208	Estrone	LC-ESI-ITFT	positive	270.162	C18H22O2	1	1	2	13	14	12	1.83516	0	1	0.857143	1	1	0.769231	9.78075	0.0002546	successful ranked
209	Estrone	LC-ESI-ITFT	positive	270.162	C18H22O2	1	1	2	10	11	10	1.96364	0	1	0.909091	1	1	0.963636	20.7281	0.0001856	successful ranked
210	Estrone	LC-ESI-ITFT	positive	270.162	C18H22O2	1	1	2	9	10	8	1.8	0	1	0.8	1	1	0.733333	12.3531	0.0001907	successful ranked
211	Estrone	LC-ESI-ITFT	positive	270.162	C18H22O2	1	1	2	8	9	7	1.77778	0	1	0.777778	1	1	0.694444	15.025	0.0001811	successful ranked
212	L-Glutamic acid	LC-ESI-ITFT (LTQ Orbitrap XL; Thermo Scientfic)	positive	147.053	C5H9NO4	1	1	1	131	13	-1	0.999998	-1	-1	-1	-1	-1	-1	3.55274	-1	Single candidate matches with the answer.
213	L-Glutamic acid	LC-ESI-ITFT (LTQ Orbitrap XL; Thermo Scientfic)	positive	147.053	C5H9NO4	1	1	1	4	5	-1	0.999998	-1	-1	-1	-1	-1	-1	11.1263	-1	Single candidate matches with the answer.
214	L-Glutamic acid	LC-ESI-ITFT (LTQ Orbitrap XL; Thermo Scientfic)	positive	147.053	C5H9NO4	1	1	1	18	12	-1	0.999998	-1	-1	-1	-1	-1	-1	4.39693	-1	Single candidate matches with the answer.
215	L-Glutamic acid	LC-ESI-ITFT (LTQ Orbitrap XL; Thermo Scientfic)	positive	147.053	C5H9NO4	1	1	1	7	7	-1	0.999998	-1	-1	-1	-1	-1	-1	6.71021	-1	Single candidate matches with the answer.
216	L-Glutamic acid	LC-ESI-ITFT (LTQ Orbitrap XL; Thermo Scientfic)	positive	147.053	C5H9NO4	1	1	1	100	18	-1	0.999998	-1	-1	-1	-1	-1	-1	3.69631	-1	Single candidate matches with the answer.
217	L-Glutamic acid	LC-ESI-ITFT (LTQ Orbitrap XL; Thermo Scientfic)	positive	147.053	C5H9NO4	1	1	1	6	3	-1	0.999998	-1	-1	-1	-1	-1	-1	10.3088	-1	Single candidate matches with the answer.
218	L-Glutamic acid	LC-ESI-ITFT (LTQ Orbitrap XL; Thermo Scientfic)	positive	147.053	C5H9NO4	1	1	1	4	5	-1	0.999998	-1	-1	-1	-1	-1	-1	11.139	-1	Single candidate matches with the answer.
219	L-Glutamic acid	LC-ESI-ITFT (LTQ Orbitrap XL; Thermo Scientfic)	positive	147.053	C5H9NO4	1	1	1	11	4	-1	0.999998	-1	-1	-1	-1	-1	-1	11.6825	-1	Single candidate matches with the answer.
220	L-Glutamic acid	LC-ESI-ITFT (LTQ Orbitrap XL; Thermo Scientfic)	negative	147.053	C5H9NO4	1	1	1	772	15	-1	0.999998	-1	-1	-1	-1	-1	-1	0.757539	-1	Single candidate matches with the answer.
221	L-Glutamic acid	LC-ESI-ITFT (LTQ Orbitrap XL; Thermo Scientfic)	negative	147.053	C5H9NO4	1	1	1	4	5	-1	0.999998	-1	-1	-1	-1	-1	-1	16.6342	-1	Single candidate matches with the answer.
222	L-Glutamic acid	LC-ESI-ITFT (LTQ Orbitrap XL; Thermo Scientfic)	negative	147.053	C5H9NO4	1	1	1	3	2	-1	0.999998	-1	-1	-1	-1	-1	-1	0	-1	Single candidate matches with the answer.
223	L-Glutamic acid	LC-ESI-ITFT (LTQ Orbitrap XL; Thermo Scientfic)	negative	147.053	C5H9NO4	1	1	1	624	14	-1	0.999998	-1	-1	-1	-1	-1	-1	0.934215	-1	Single candidate matches with the answer.
224	L-Glutamic acid	LC-ESI-ITFT	positive	147.053	C5H9NO4	1	1	1	4	5	-1	0.999998	-1	-1	-1	-1	-1	-1	11.1263	-1	Single candidate matches with the answer.
225	L-Glutamic acid	LC-ESI-ITFT	positive	147.053	C5H9NO4	1	1	1	6	3	-1	0.999998	-1	-1	-1	-1	-1	-1	10.3088	-1	Single candidate matches with the answer.
226	L-Glutamic acid	LC-ESI-ITFT	positive	147.053	C5H9NO4	1	1	1	4	5	-1	0.999998	-1	-1	-1	-1	-1	-1	11.139	-1	Single candidate matches with the answer.
227	Estradiol	LC-ESI-ITFT	positive	272.178	C18H24O2	1	1	2	13	14	11	1.52747	0	1	0.785714	1	1	0.373626	10.888	0.0002831	successful ranked
228	Estradiol	LC-ESI-ITFT	positive	272.178	C18H24O2	2	2	2	6	7	4	1.33333	0	1	0.571429	0	1	0.047619	47.8413	0.0001708	successful ranked
229	Estradiol	LC-ESI-ITFT	positive	272.178	C18H24O2	1	1	2	18	19	17	1.70175	0	1	0.894737	1	1	0.538012	8.79299	0.0003065	successful ranked
230	Estradiol	LC-ESI-ITFT	positive	272.178	C18H24O2	1	1	2	18	19	13	1.48366	0	1	0.722222	1	1	0.45098	8.79301	0.0002766	successful ranked
231	L-Malic acid	LC-ESI-ITFT (LTQ Orbitrap XL; Thermo Scientfic)	negative	134.022	C4H6O5	1	1	1	447	39	-1	0.999998	-1	-1	-1	-1	-1	-1	0.787548	-1	Single candidate matches with the answer.
232	L-Malic acid	LC-ESI-ITFT (LTQ Orbitrap XL; Thermo Scientfic)	negative	134.022	C4H6O5	1	1	1	3	4	-1	0.999998	-1	-1	-1	-1	-1	-1	6.48583	-1	Single candidate matches with the answer.
233	L-Malic acid	LC-ESI-ITFT	negative	134.022	C4H6O5	1	1	1	3	4	-1	0.999998	-1	-1	-1	-1	-1	-1	6.48583	-1	Single candidate matches with the answer.
234	Hypoxanthine	LC-ESI-ITFT (LTQ Orbitrap XL; Thermo Scientfic)	positive	136.039	C5H4N4O	1	1	2	125	7	2	1.09524	0	1	0.285714	1	1	0.0952381	2.12412	0.0001692	successful ranked
235	Hypoxanthine	LC-ESI-ITFT (LTQ Orbitrap XL; Thermo Scientfic)	positive	136.039	C5H4N4O	1	1	2	3	3	0	0.999998	-1	0	-1	-1	-1	-1	12.1542	0.0001392	No mother-daughter relation is found for all the precursor formula.
236	Hypoxanthine	LC-ESI-ITFT (LTQ Orbitrap XL; Thermo Scientfic)	positive	136.039	C5H4N4O	1	1	2	10	10	0	0.999998	-1	0	-1	-1	-1	-1	5.66967	0.0001648	No mother-daughter relation is found for all the precursor formula.
237	Hypoxanthine	LC-ESI-ITFT (LTQ Orbitrap XL; Thermo Scientfic)	positive	136.039	C5H4N4O	1	1	2	8	1	0	0.999998	-1	0	-1	-1	-1	-1	0	0	No mother-daughter relation is found for all the precursor formula.
238	Hypoxanthine	LC-ESI-ITFT (LTQ Orbitrap XL; Thermo Scientfic)	positive	136.039	C5H4N4O	1	1	2	126	8	2	1.07143	0	1	0.25	1	1	0.0714286	3.11292	0.0001488	successful ranked
239	Hypoxanthine	LC-ESI-ITFT (LTQ Orbitrap XL; Thermo Scientfic)	positive	136.039	C5H4N4O	1	1	2	7	8	0	0.999998	-1	0	-1	-1	-1	-1	6.25019	0	No mother-daughter relation is found for all the precursor formula.
240	Hypoxanthine	LC-ESI-ITFT (LTQ Orbitrap XL; Thermo Scientfic)	positive	136.039	C5H4N4O	1	1	2	25	1	0	0.999998	-1	0	-1	-1	-1	-1	0	0	No mother-daughter relation is found for all the precursor formula.
241	Hypoxanthine	LC-ESI-ITFT (LTQ Orbitrap XL; Thermo Scientfic)	negative	136.039	C5H4N4O	1	1	2	678	56	4	1.06593	0	1	0.285714	1	1	0.0549451	0.715863	0.0004848	successful ranked
242	Hypoxanthine	LC-ESI-ITFT	positive	136.039	C5H4N4O	1	1	2	7	8	0	0.999998	-1	0	-1	-1	-1	-1	6.25019	0	No mother-daughter relation is found for all the precursor formula.
243	L-Tyrosine	LC-ESI-ITFT (LTQ Orbitrap XL; Thermo Scientfic)	positive	181.074	C9H11NO3	2	2	2	150	30	7	1.03989	0	1	0.259259	1	0	0.00854701	1.90212	0.0003569	successful ranked
244	L-Tyrosine	LC-ESI-ITFT (LTQ Orbitrap XL; Thermo Scientfic)	positive	181.074	C9H11NO3	2	2	2	7	5	0	1.33333	0	1	0	0	1	0.333333	4.95345	0.0001576	successful ranked
245	L-Tyrosine	LC-ESI-ITFT (LTQ Orbitrap XL; Thermo Scientfic)	positive	181.074	C9H11NO3	1	1	2	8	2	0	0.999997	-1	0	-1	-1	-1	-1	12.7168	9.35e-05	No mother-daughter relation is found for all the precursor formula.
246	L-Tyrosine	LC-ESI-ITFT (LTQ Orbitrap XL; Thermo Scientfic)	positive	181.074	C9H11NO3	1	1	2	113	42	8	1.02402	0	1	0.216216	1	1	0.0045045	1.9972	0.0004042	successful ranked
247	L-Tyrosine	LC-ESI-ITFT (LTQ Orbitrap XL; Thermo Scientfic)	positive	181.074	C9H11NO3	2	2	2	10	8	0	1.1	0	1	0	0	1	0.1	10.3595	0.0001865	successful ranked
248	L-Tyrosine	LC-ESI-ITFT (LTQ Orbitrap XL; Thermo Scientfic)	positive	181.074	C9H11NO3	1	1	2	7	4	0	0.999997	-1	0	-1	-1	-1	-1	4.98112	0.0001268	No mother-daughter relation is found for all the precursor formula.
249	L-Tyrosine	LC-ESI-ITFT (LTQ Orbitrap XL; Thermo Scientfic)	positive	181.074	C9H11NO3	1	1	2	10	6	0	0.999997	-1	0	-1	-1	-1	-1	5.54841	0.0001391	No mother-daughter relation is found for all the precursor formula.
250	L-Tyrosine	LC-ESI-ITFT (LTQ Orbitrap XL; Thermo Scientfic)	negative	181.074	C9H11NO3	1	1	2	699	34	7	1.06667	0	1	0.28	1	0	0.0233333	1.15564	0.0003758	successful ranked
251	L-Tyrosine	LC-ESI-ITFT (LTQ Orbitrap XL; Thermo Scientfic)	negative	181.074	C9H11NO3	1	1	2	7	7	0	0.999997	-1	0	-1	-1	-1	-1	7.5493	0.0001589	No mother-daughter relation is found for all the precursor formula.
252	L-Tyrosine	LC-ESI-ITFT (LTQ Orbitrap XL; Thermo Scientfic)	negative	181.074	C9H11NO3	1	1	2	19	3	0	0.999997	-1	0	-1	-1	-1	-1	0.288744	0.0001179	No mother-daughter relation is found for all the precursor formula.
253	L-Tyrosine	LC-ESI-ITFT (LTQ Orbitrap XL; Thermo Scientfic)	negative	181.074	C9H11NO3	1	1	2	684	50	3	1.09091	0	1	0.25	1	0	0.030303	0.969533	0.0004383	successful ranked
254	L-Tyrosine	LC-ESI-ITFT (LTQ Orbitrap XL; Thermo Scientfic)	negative	181.074	C9H11NO3	1	1	2	7	8	0	0.999997	-1	0	-1	-1	-1	-1	7.47649	0.0001655	No mother-daughter relation is found for all the precursor formula.
255	L-Tyrosine	LC-ESI-ITFT (LTQ Orbitrap XL; Thermo Scientfic)	negative	181.074	C9H11NO3	1	1	2	22	1	0	0.999997	-1	0	-1	-1	-1	-1	0	0	No mother-daughter relation is found for all the precursor formula.
256	L-Tyrosine	LC-ESI-ITFT	negative	181.074	C9H11NO3	1	1	2	7	7	0	0.999997	-1	0	-1	-1	-1	-1	7.5493	0.0001455	No mother-daughter relation is found for all the precursor formula.
257	L-Tyrosine	LC-ESI-ITFT	negative	181.074	C9H11NO3	1	1	2	19	3	0	0.999997	-1	0	-1	-1	-1	-1	0.288744	0.0001505	No mother-daughter relation is found for all the precursor formula.
258	L-Tyrosine	LC-ESI-ITFT	negative	181.074	C9H11NO3	1	1	2	7	8	0	0.999997	-1	0	-1	-1	-1	-1	7.47649	0.0001501	No mother-daughter relation is found for all the precursor formula.
259	L-Tyrosine	LC-ESI-ITFT	negative	181.074	C9H11NO3	1	1	2	22	1	0	0.999997	-1	0	-1	-1	-1	-1	0	0	No mother-daughter relation is found for all the precursor formula.
260	L-Tyrosine	LC-ESI-ITFT	positive	181.074	C9H11NO3	2	2	2	7	4	0	1.33333	0	1	0	0	1	0.333333	4.95345	0.0001423	successful ranked
261	L-Tyrosine	LC-ESI-ITFT	positive	181.074	C9H11NO3	1	1	2	8	2	0	0.999997	-1	0	-1	-1	-1	-1	12.7168	9.09e-05	No mother-daughter relation is found for all the precursor formula.
262	L-Tyrosine	LC-ESI-ITFT	positive	181.074	C9H11NO3	2	2	2	10	8	0	1.1	0	1	0	0	1	0.1	10.3595	0.0001699	successful ranked
263	L-Tyrosine	LC-ESI-ITFT	positive	181.074	C9H11NO3	1	1	2	7	3	0	0.999997	-1	0	-1	-1	-1	-1	4.98112	0.0001143	No mother-daughter relation is found for all the precursor formula.
264	L-Tyrosine	LC-ESI-ITFT	positive	181.074	C9H11NO3	1	1	2	10	6	0	0.999997	-1	0	-1	-1	-1	-1	5.54841	0.0001302	No mother-daughter relation is found for all the precursor formula.
265	L-Phenylalanine	LC-ESI-ITFT (LTQ Orbitrap XL; Thermo Scientfic)	positive	165.079	C9H11NO2	1	1	2	102	25	7	1.08571	0	1	0.333333	1	1	0.0428571	2.76014	0.0003181	successful ranked
266	L-Phenylalanine	LC-ESI-ITFT (LTQ Orbitrap XL; Thermo Scientfic)	positive	165.079	C9H11NO2	1	2	2	11	8	1	1.1	0	0	0.2	1	0	0	13.3446	0.0002119	successful ranked
267	L-Phenylalanine	LC-ESI-ITFT (LTQ Orbitrap XL; Thermo Scientfic)	positive	165.079	C9H11NO2	1	1	2	5	5	0	0.999997	-1	0	-1	-1	-1	-1	8.08992	0.000122	No mother-daughter relation is found for all the precursor formula.
268	L-Phenylalanine	LC-ESI-ITFT (LTQ Orbitrap XL; Thermo Scientfic)	positive	165.079	C9H11NO2	1	1	2	6	5	0	0.999997	-1	0	-1	-1	-1	-1	5.96831	0.0001176	No mother-daughter relation is found for all the precursor formula.
269	L-Phenylalanine	LC-ESI-ITFT (LTQ Orbitrap XL; Thermo Scientfic)	positive	165.079	C9H11NO2	1	1	2	87	21	6	1.12381	0	1	0.4	1	1	0.0380952	3.53619	0.0003203	successful ranked
270	L-Phenylalanine	LC-ESI-ITFT (LTQ Orbitrap XL; Thermo Scientfic)	positive	165.079	C9H11NO2	1	1	2	10	8	0	0.999997	-1	0	-1	-1	-1	-1	13.6186	0.0001659	No mother-daughter relation is found for all the precursor formula.
271	L-Phenylalanine	LC-ESI-ITFT (LTQ Orbitrap XL; Thermo Scientfic)	positive	165.079	C9H11NO2	1	1	2	5	5	0	0.999997	-1	0	-1	-1	-1	-1	8.18923	0.000132	No mother-daughter relation is found for all the precursor formula.
272	L-Phenylalanine	LC-ESI-ITFT (LTQ Orbitrap XL; Thermo Scientfic)	positive	165.079	C9H11NO2	1	1	2	7	6	0	0.999997	-1	0	-1	-1	-1	-1	7.61767	0.0001356	No mother-daughter relation is found for all the precursor formula.
273	L-Phenylalanine	LC-ESI-ITFT (LTQ Orbitrap XL; Thermo Scientfic)	negative	165.079	C9H11NO2	1	1	2	594	40	3	1.02632	0	1	0.15	1	0	0.0105263	1.17574	0.0003693	successful ranked
274	L-Phenylalanine	LC-ESI-ITFT (LTQ Orbitrap XL; Thermo Scientfic)	negative	165.079	C9H11NO2	1	1	2	3	4	0	0.999997	-1	0	-1	-1	-1	-1	13.3331	0.0001282	No mother-daughter relation is found for all the precursor formula.
275	L-Phenylalanine	LC-ESI-ITFT (LTQ Orbitrap XL; Thermo Scientfic)	negative	165.079	C9H11NO2	1	1	2	17	1	0	0.999997	-1	0	-1	-1	-1	-1	0	0	No mother-daughter relation is found for all the precursor formula.
276	L-Phenylalanine	LC-ESI-ITFT (LTQ Orbitrap XL; Thermo Scientfic)	negative	165.079	C9H11NO2	1	1	2	4	1	0	0.999997	-1	0	-1	-1	-1	-1	0	0	No mother-daughter relation is found for all the precursor formula.
277	L-Phenylalanine	LC-ESI-ITFT	negative	165.079	C9H11NO2	1	1	2	3	4	0	0.999997	-1	0	-1	-1	-1	-1	13.3331	0.000124	No mother-daughter relation is found for all the precursor formula.
278	L-Phenylalanine	LC-ESI-ITFT	positive	165.079	C9H11NO2	1	1	2	24	4	0	0.999997	-1	0	-1	-1	-1	-1	4.69366	0.0001257	No mother-daughter relation is found for all the precursor formula.
279	L-Phenylalanine	LC-ESI-ITFT	positive	165.079	C9H11NO2	1	1	2	32	4	0	0.999997	-1	0	-1	-1	-1	-1	4.16052	0.0001228	No mother-daughter relation is found for all the precursor formula.
280	L-Phenylalanine	LC-ESI-ITFT	positive	165.079	C9H11NO2	1	1	2	26	4	0	0.999997	-1	0	-1	-1	-1	-1	4.07905	0.0001356	No mother-daughter relation is found for all the precursor formula.
281	L-Phenylalanine	LC-ESI-ITFT	positive	165.079	C9H11NO2	1	1	2	22	4	0	0.999997	-1	0	-1	-1	-1	-1	6.74446	0.0001256	No mother-daughter relation is found for all the precursor formula.
282	L-Phenylalanine	LC-ESI-ITFT	positive	165.079	C9H11NO2	1	2	2	11	8	1	1.1	0	0	0.2	1	0	0	13.3446	0.0002031	successful ranked
283	L-Phenylalanine	LC-ESI-ITFT	positive	165.079	C9H11NO2	1	1	2	5	5	0	0.999997	-1	0	-1	-1	-1	-1	8.08992	0.0001277	No mother-daughter relation is found for all the precursor formula.
284	L-Phenylalanine	LC-ESI-ITFT	positive	165.079	C9H11NO2	1	1	2	6	5	0	0.999997	-1	0	-1	-1	-1	-1	5.96831	0.0001166	No mother-daughter relation is found for all the precursor formula.
285	L-Phenylalanine	LC-ESI-ITFT	positive	165.079	C9H11NO2	1	1	2	10	8	0	0.999997	-1	0	-1	-1	-1	-1	13.6186	0.0001463	No mother-daughter relation is found for all the precursor formula.
286	L-Phenylalanine	LC-ESI-ITFT	positive	165.079	C9H11NO2	1	1	2	5	5	0	0.999997	-1	0	-1	-1	-1	-1	8.18923	0.0001252	No mother-daughter relation is found for all the precursor formula.
287	L-Phenylalanine	LC-ESI-ITFT	positive	165.079	C9H11NO2	1	1	2	7	6	0	0.999997	-1	0	-1	-1	-1	-1	7.61767	0.000135	No mother-daughter relation is found for all the precursor formula.
288	L-Proline	LC-ESI-ITFT (LTQ Orbitrap XL; Thermo Scientfic)	positive	115.063	C5H9NO2	1	1	1	98	5	-1	0.999998	-1	-1	-1	-1	-1	-1	1.79438	-1	Single candidate matches with the answer.
289	L-Proline	LC-ESI-ITFT (LTQ Orbitrap XL; Thermo Scientfic)	positive	115.063	C5H9NO2	1	1	1	4	3	-1	0.999998	-1	-1	-1	-1	-1	-1	14.0125	-1	Single candidate matches with the answer.
290	L-Proline	LC-ESI-ITFT (LTQ Orbitrap XL; Thermo Scientfic)	positive	115.063	C5H9NO2	1	1	1	116	4	-1	0.999998	-1	-1	-1	-1	-1	-1	1.8338	-1	Single candidate matches with the answer.
291	L-Proline	LC-ESI-ITFT (LTQ Orbitrap XL; Thermo Scientfic)	positive	115.063	C5H9NO2	1	1	1	6	3	-1	0.999998	-1	-1	-1	-1	-1	-1	10.6325	-1	Single candidate matches with the answer.
292	L-Proline	LC-ESI-ITFT (LTQ Orbitrap XL; Thermo Scientfic)	positive	115.063	C5H9NO2	1	1	1	4	2	-1	0.999998	-1	-1	-1	-1	-1	-1	32.4467	-1	Single candidate matches with the answer.
293	L-Proline	LC-ESI-ITFT	positive	115.063	C5H9NO2	1	1	1	4	3	-1	0.999998	-1	-1	-1	-1	-1	-1	14.0125	-1	Single candidate matches with the answer.
294	L-Proline	LC-ESI-ITFT	positive	115.063	C5H9NO2	1	1	1	6	3	-1	0.999998	-1	-1	-1	-1	-1	-1	10.6325	-1	Single candidate matches with the answer.
295	L-Proline	LC-ESI-ITFT	positive	115.063	C5H9NO2	1	1	1	4	2	-1	0.999998	-1	-1	-1	-1	-1	-1	32.4467	-1	Single candidate matches with the answer.
296	L-Threonine	LC-ESI-ITFT (LTQ Orbitrap XL; Thermo Scientfic)	positive	119.058	C4H9NO3	1	1	1	125	10	-1	0.999998	-1	-1	-1	-1	-1	-1	1.63153	-1	Single candidate matches with the answer.
297	L-Threonine	LC-ESI-ITFT (LTQ Orbitrap XL; Thermo Scientfic)	positive	119.058	C4H9NO3	1	1	1	5	5	-1	0.999998	-1	-1	-1	-1	-1	-1	7.71503	-1	Single candidate matches with the answer.
298	L-Threonine	LC-ESI-ITFT (LTQ Orbitrap XL; Thermo Scientfic)	positive	119.058	C4H9NO3	1	1	1	16	8	-1	0.999998	-1	-1	-1	-1	-1	-1	3.29344	-1	Single candidate matches with the answer.
299	L-Threonine	LC-ESI-ITFT (LTQ Orbitrap XL; Thermo Scientfic)	positive	119.058	C4H9NO3	1	1	1	9	5	-1	0.999998	-1	-1	-1	-1	-1	-1	5.99552	-1	Single candidate matches with the answer.
300	L-Threonine	LC-ESI-ITFT (LTQ Orbitrap XL; Thermo Scientfic)	positive	119.058	C4H9NO3	1	1	1	99	12	-1	0.999998	-1	-1	-1	-1	-1	-1	1.58967	-1	Single candidate matches with the answer.
301	L-Threonine	LC-ESI-ITFT (LTQ Orbitrap XL; Thermo Scientfic)	positive	119.058	C4H9NO3	1	1	1	17	11	-1	0.999998	-1	-1	-1	-1	-1	-1	4.54085	-1	Single candidate matches with the answer.
302	L-Threonine	LC-ESI-ITFT (LTQ Orbitrap XL; Thermo Scientfic)	positive	119.058	C4H9NO3	1	1	1	6	5	-1	0.999998	-1	-1	-1	-1	-1	-1	8.07397	-1	Single candidate matches with the answer.
303	L-Threonine	LC-ESI-ITFT (LTQ Orbitrap XL; Thermo Scientfic)	positive	119.058	C4H9NO3	1	1	1	6	4	-1	0.999998	-1	-1	-1	-1	-1	-1	8.04237	-1	Single candidate matches with the answer.
304	L-Threonine	LC-ESI-ITFT (LTQ Orbitrap XL; Thermo Scientfic)	negative	119.058	C4H9NO3	1	1	1	563	22	-1	0.999998	-1	-1	-1	-1	-1	-1	0.661789	-1	Single candidate matches with the answer.
305	L-Threonine	LC-ESI-ITFT (LTQ Orbitrap XL; Thermo Scientfic)	negative	119.058	C4H9NO3	1	1	1	4	1	-1	0.999998	-1	-1	-1	-1	-1	-1	0	-1	Single candidate matches with the answer.
306	L-Threonine	LC-ESI-ITFT (LTQ Orbitrap XL; Thermo Scientfic)	negative	119.058	C4H9NO3	1	1	1	6	1	-1	0.999998	-1	-1	-1	-1	-1	-1	0	-1	Single candidate matches with the answer.
307	L-Threonine	LC-ESI-ITFT	positive	119.058	C4H9NO3	1	1	1	5	5	-1	0.999998	-1	-1	-1	-1	-1	-1	7.71503	-1	Single candidate matches with the answer.
308	L-Threonine	LC-ESI-ITFT	positive	119.058	C4H9NO3	1	1	1	17	11	-1	0.999998	-1	-1	-1	-1	-1	-1	4.54085	-1	Single candidate matches with the answer.
309	L-Threonine	LC-ESI-ITFT	positive	119.058	C4H9NO3	1	1	1	6	5	-1	0.999998	-1	-1	-1	-1	-1	-1	8.07397	-1	Single candidate matches with the answer.
310	L-Threonine	LC-ESI-ITFT	positive	119.058	C4H9NO3	1	1	1	6	4	-1	0.999998	-1	-1	-1	-1	-1	-1	8.04237	-1	Single candidate matches with the answer.
311	L-Asparagine	LC-ESI-ITFT (LTQ Orbitrap XL; Thermo Scientfic)	positive	132.053	C4H8N2O3	1	1	1	101	7	-1	0.999998	-1	-1	-1	-1	-1	-1	3.01798	-1	Single candidate matches with the answer.
312	L-Asparagine	LC-ESI-ITFT (LTQ Orbitrap XL; Thermo Scientfic)	positive	132.053	C4H8N2O3	1	1	1	7	6	-1	0.999998	-1	-1	-1	-1	-1	-1	7.02835	-1	Single candidate matches with the answer.
313	L-Asparagine	LC-ESI-ITFT (LTQ Orbitrap XL; Thermo Scientfic)	positive	132.053	C4H8N2O3	1	1	1	26	8	-1	0.999998	-1	-1	-1	-1	-1	-1	3.44183	-1	Single candidate matches with the answer.
314	L-Asparagine	LC-ESI-ITFT (LTQ Orbitrap XL; Thermo Scientfic)	positive	132.053	C4H8N2O3	1	1	1	25	4	-1	0.999998	-1	-1	-1	-1	-1	-1	13.8549	-1	Single candidate matches with the answer.
315	L-Asparagine	LC-ESI-ITFT (LTQ Orbitrap XL; Thermo Scientfic)	positive	132.053	C4H8N2O3	1	1	1	94	9	-1	0.999998	-1	-1	-1	-1	-1	-1	2.55684	-1	Single candidate matches with the answer.
316	L-Asparagine	LC-ESI-ITFT (LTQ Orbitrap XL; Thermo Scientfic)	positive	132.053	C4H8N2O3	1	1	1	7	5	-1	0.999998	-1	-1	-1	-1	-1	-1	7.00828	-1	Single candidate matches with the answer.
317	L-Asparagine	LC-ESI-ITFT (LTQ Orbitrap XL; Thermo Scientfic)	positive	132.053	C4H8N2O3	1	1	1	11	6	-1	0.999998	-1	-1	-1	-1	-1	-1	5.45474	-1	Single candidate matches with the answer.
318	L-Asparagine	LC-ESI-ITFT (LTQ Orbitrap XL; Thermo Scientfic)	positive	132.053	C4H8N2O3	1	1	1	21	6	-1	0.999998	-1	-1	-1	-1	-1	-1	9.4704	-1	Single candidate matches with the answer.
319	L-Asparagine	LC-ESI-ITFT (LTQ Orbitrap XL; Thermo Scientfic)	negative	132.053	C4H8N2O3	1	1	1	509	45	-1	0.999998	-1	-1	-1	-1	-1	-1	0.811452	-1	Single candidate matches with the answer.
320	L-Asparagine	LC-ESI-ITFT (LTQ Orbitrap XL; Thermo Scientfic)	negative	132.053	C4H8N2O3	1	1	1	3	4	-1	0.999998	-1	-1	-1	-1	-1	-1	9.73435	-1	Single candidate matches with the answer.
321	L-Asparagine	LC-ESI-ITFT (LTQ Orbitrap XL; Thermo Scientfic)	negative	132.053	C4H8N2O3	1	1	1	3	4	-1	0.999998	-1	-1	-1	-1	-1	-1	12.6003	-1	Single candidate matches with the answer.
322	L-Asparagine	LC-ESI-ITFT (LTQ Orbitrap XL; Thermo Scientfic)	negative	132.053	C4H8N2O3	1	1	1	493	59	-1	0.999998	-1	-1	-1	-1	-1	-1	0.708219	-1	Single candidate matches with the answer.
323	L-Asparagine	LC-ESI-ITFT (LTQ Orbitrap XL; Thermo Scientfic)	negative	132.053	C4H8N2O3	1	1	1	4	4	-1	0.999998	-1	-1	-1	-1	-1	-1	9.60261	-1	Single candidate matches with the answer.
324	L-Asparagine	LC-ESI-ITFT	negative	132.053	C4H8N2O3	1	1	1	3	4	-1	0.999998	-1	-1	-1	-1	-1	-1	9.73435	-1	Single candidate matches with the answer.
325	L-Asparagine	LC-ESI-ITFT	negative	132.053	C4H8N2O3	1	1	1	3	4	-1	0.999998	-1	-1	-1	-1	-1	-1	12.6003	-1	Single candidate matches with the answer.
326	L-Asparagine	LC-ESI-ITFT	negative	132.053	C4H8N2O3	1	1	1	4	4	-1	0.999998	-1	-1	-1	-1	-1	-1	9.60261	-1	Single candidate matches with the answer.
327	L-Asparagine	LC-ESI-ITFT	positive	132.053	C4H8N2O3	1	1	1	7	6	-1	0.999998	-1	-1	-1	-1	-1	-1	7.02835	-1	Single candidate matches with the answer.
328	L-Asparagine	LC-ESI-ITFT	positive	132.053	C4H8N2O3	1	1	1	25	4	-1	0.999998	-1	-1	-1	-1	-1	-1	13.8549	-1	Single candidate matches with the answer.
329	L-Asparagine	LC-ESI-ITFT	positive	132.053	C4H8N2O3	1	1	1	7	5	-1	0.999998	-1	-1	-1	-1	-1	-1	7.00828	-1	Single candidate matches with the answer.
330	L-Asparagine	LC-ESI-ITFT	positive	132.053	C4H8N2O3	1	1	1	11	6	-1	0.999998	-1	-1	-1	-1	-1	-1	5.45474	-1	Single candidate matches with the answer.
331	L-Asparagine	LC-ESI-ITFT	positive	132.053	C4H8N2O3	1	1	1	21	6	-1	0.999998	-1	-1	-1	-1	-1	-1	9.4704	-1	Single candidate matches with the answer.
332	D-Mannose	LC-ESI-ITFT	positive	180.063	C6H12O6	1	1	2	46	30	5	1.08772	0	1	0.263158	1	1	0.0818713	3.58496	0.0003513	successful ranked
333	L-Isoleucine	LC-ESI-ITFT (LTQ Orbitrap XL; Thermo Scientfic)	positive	131.095	C6H13NO2	1	1	1	97	7	-1	0.999997	-1	-1	-1	-1	-1	-1	2.48282	-1	Single candidate matches with the answer.
334	L-Isoleucine	LC-ESI-ITFT (LTQ Orbitrap XL; Thermo Scientfic)	positive	131.095	C6H13NO2	1	1	1	5	4	-1	0.999997	-1	-1	-1	-1	-1	-1	18.2785	-1	Single candidate matches with the answer.
335	L-Isoleucine	LC-ESI-ITFT (LTQ Orbitrap XL; Thermo Scientfic)	positive	131.095	C6H13NO2	1	1	1	11	3	-1	0.999997	-1	-1	-1	-1	-1	-1	2.2872	-1	Single candidate matches with the answer.
336	L-Isoleucine	LC-ESI-ITFT (LTQ Orbitrap XL; Thermo Scientfic)	positive	131.095	C6H13NO2	1	1	1	100	6	-1	0.999997	-1	-1	-1	-1	-1	-1	3.11391	-1	Single candidate matches with the answer.
337	L-Isoleucine	LC-ESI-ITFT (LTQ Orbitrap XL; Thermo Scientfic)	positive	131.095	C6H13NO2	1	1	1	8	4	-1	0.999997	-1	-1	-1	-1	-1	-1	9.79232	-1	Single candidate matches with the answer.
338	L-Isoleucine	LC-ESI-ITFT (LTQ Orbitrap XL; Thermo Scientfic)	positive	131.095	C6H13NO2	1	1	1	27	7	-1	0.999997	-1	-1	-1	-1	-1	-1	3.29744	-1	Single candidate matches with the answer.
339	L-Isoleucine	LC-ESI-ITFT	positive	131.095	C6H13NO2	1	1	1	5	4	-1	0.999997	-1	-1	-1	-1	-1	-1	18.2785	-1	Single candidate matches with the answer.
340	L-Isoleucine	LC-ESI-ITFT	positive	131.095	C6H13NO2	1	1	1	8	4	-1	0.999997	-1	-1	-1	-1	-1	-1	9.79232	-1	Single candidate matches with the answer.
341	L-Histidine	LC-ESI-ITFT (LTQ Orbitrap XL; Thermo Scientfic)	positive	155.069	C6H9N3O2	1	1	1	152	13	-1	0.999997	-1	-1	-1	-1	-1	-1	3.17544	-1	Single candidate matches with the answer.
342	L-Histidine	LC-ESI-ITFT (LTQ Orbitrap XL; Thermo Scientfic)	positive	155.069	C6H9N3O2	1	1	1	4	4	-1	0.999997	-1	-1	-1	-1	-1	-1	12.4557	-1	Single candidate matches with the answer.
343	L-Histidine	LC-ESI-ITFT (LTQ Orbitrap XL; Thermo Scientfic)	positive	155.069	C6H9N3O2	1	1	1	8	4	-1	0.999997	-1	-1	-1	-1	-1	-1	9.44233	-1	Single candidate matches with the answer.
344	L-Histidine	LC-ESI-ITFT (LTQ Orbitrap XL; Thermo Scientfic)	positive	155.069	C6H9N3O2	1	1	1	26	17	-1	0.999997	-1	-1	-1	-1	-1	-1	5.11757	-1	Single candidate matches with the answer.
345	L-Histidine	LC-ESI-ITFT (LTQ Orbitrap XL; Thermo Scientfic)	positive	155.069	C6H9N3O2	1	1	1	173	24	-1	0.999997	-1	-1	-1	-1	-1	-1	2.80087	-1	Single candidate matches with the answer.
346	L-Histidine	LC-ESI-ITFT (LTQ Orbitrap XL; Thermo Scientfic)	positive	155.069	C6H9N3O2	1	1	1	8	4	-1	0.999997	-1	-1	-1	-1	-1	-1	9.46593	-1	Single candidate matches with the answer.
347	L-Histidine	LC-ESI-ITFT (LTQ Orbitrap XL; Thermo Scientfic)	positive	155.069	C6H9N3O2	1	1	1	14	7	-1	0.999997	-1	-1	-1	-1	-1	-1	7.22877	-1	Single candidate matches with the answer.
348	L-Histidine	LC-ESI-ITFT (LTQ Orbitrap XL; Thermo Scientfic)	positive	155.069	C6H9N3O2	1	1	1	28	9	-1	0.999997	-1	-1	-1	-1	-1	-1	3.98404	-1	Single candidate matches with the answer.
349	L-Histidine	LC-ESI-ITFT (LTQ Orbitrap XL; Thermo Scientfic)	negative	155.069	C6H9N3O2	1	1	1	1283	23	-1	0.999997	-1	-1	-1	-1	-1	-1	1.14051	-1	Single candidate matches with the answer.
350	L-Histidine	LC-ESI-ITFT (LTQ Orbitrap XL; Thermo Scientfic)	negative	155.069	C6H9N3O2	1	1	1	12	10	-1	0.999997	-1	-1	-1	-1	-1	-1	6.72669	-1	Single candidate matches with the answer.
351	L-Histidine	LC-ESI-ITFT (LTQ Orbitrap XL; Thermo Scientfic)	negative	155.069	C6H9N3O2	1	1	1	9	6	-1	0.999997	-1	-1	-1	-1	-1	-1	8.15159	-1	Single candidate matches with the answer.
352	L-Histidine	LC-ESI-ITFT (LTQ Orbitrap XL; Thermo Scientfic)	negative	155.069	C6H9N3O2	1	1	1	1468	24	-1	0.999997	-1	-1	-1	-1	-1	-1	0.760005	-1	Single candidate matches with the answer.
353	L-Histidine	LC-ESI-ITFT (LTQ Orbitrap XL; Thermo Scientfic)	negative	155.069	C6H9N3O2	1	1	1	10	9	-1	0.999997	-1	-1	-1	-1	-1	-1	6.94704	-1	Single candidate matches with the answer.
354	L-Histidine	LC-ESI-ITFT (LTQ Orbitrap XL; Thermo Scientfic)	negative	155.069	C6H9N3O2	1	1	1	12	12	-1	0.999997	-1	-1	-1	-1	-1	-1	7.74646	-1	Single candidate matches with the answer.
355	L-Histidine	LC-ESI-ITFT (LTQ Orbitrap XL; Thermo Scientfic)	negative	155.069	C6H9N3O2	1	1	1	4	1	-1	0.999997	-1	-1	-1	-1	-1	-1	0	-1	Single candidate matches with the answer.
356	L-Histidine	LC-ESI-ITFT	negative	155.069	C6H9N3O2	1	1	1	12	10	-1	0.999997	-1	-1	-1	-1	-1	-1	6.72669	-1	Single candidate matches with the answer.
357	L-Histidine	LC-ESI-ITFT	negative	155.069	C6H9N3O2	1	1	1	10	9	-1	0.999997	-1	-1	-1	-1	-1	-1	6.94704	-1	Single candidate matches with the answer.
358	L-Dopa	LC-ESI-ITFT (LTQ Orbitrap XL; Thermo Scientfic)	positive	197.069	C9H11NO4	1	2	2	193	18	1	1.00952	0	0	0.0666667	1	0	0	1.98569	0.0002449	successful ranked
359	L-Dopa	LC-ESI-ITFT (LTQ Orbitrap XL; Thermo Scientfic)	positive	197.069	C9H11NO4	1	1	2	13	9	0	0.999997	-1	0	-1	-1	-1	-1	12.2057	0.0001926	No mother-daughter relation is found for all the precursor formula.
360	L-Dopa	LC-ESI-ITFT (LTQ Orbitrap XL; Thermo Scientfic)	positive	197.069	C9H11NO4	1	1	2	9	6	0	0.999997	-1	0	-1	-1	-1	-1	7.1267	0.0001402	No mother-daughter relation is found for all the precursor formula.
361	L-Dopa	LC-ESI-ITFT (LTQ Orbitrap XL; Thermo Scientfic)	positive	197.069	C9H11NO4	1	1	2	163	33	11	1.13043	0	1	0.458333	1	1	0.0434783	3.35291	0.0003944	successful ranked
362	L-Dopa	LC-ESI-ITFT (LTQ Orbitrap XL; Thermo Scientfic)	positive	197.069	C9H11NO4	1	1	2	5	6	0	0.999997	-1	0	-1	-1	-1	-1	5.65909	0	No mother-daughter relation is found for all the precursor formula.
363	L-Dopa	LC-ESI-ITFT (LTQ Orbitrap XL; Thermo Scientfic)	positive	197.069	C9H11NO4	1	1	2	4	2	0	0.999997	-1	0	-1	-1	-1	-1	40.2071	0.0001521	No mother-daughter relation is found for all the precursor formula.
364	L-Dopa	LC-ESI-ITFT (LTQ Orbitrap XL; Thermo Scientfic)	negative	197.069	C9H11NO4	1	1	2	490	34	12	1.10685	0	1	0.375	0	1	0.00604839	1.69331	0.0004947	successful ranked
365	L-Dopa	LC-ESI-ITFT (LTQ Orbitrap XL; Thermo Scientfic)	negative	197.069	C9H11NO4	1	1	2	14	11	0	0.999997	-1	0	-1	-1	-1	-1	8.05867	0.0002015	No mother-daughter relation is found for all the precursor formula.
366	L-Dopa	LC-ESI-ITFT (LTQ Orbitrap XL; Thermo Scientfic)	negative	197.069	C9H11NO4	1	1	2	14	10	0	0.999997	-1	0	-1	-1	-1	-1	8.43987	0.0001934	No mother-daughter relation is found for all the precursor formula.
367	L-Dopa	LC-ESI-ITFT (LTQ Orbitrap XL; Thermo Scientfic)	negative	197.069	C9H11NO4	1	1	2	5	4	0	0.999997	-1	0	-1	-1	-1	-1	5.73295	0.0001049	No mother-daughter relation is found for all the precursor formula.
368	L-Dopa	LC-ESI-ITFT (LTQ Orbitrap XL; Thermo Scientfic)	negative	197.069	C9H11NO4	2	2	2	322	41	14	1.10242	0	1	0.368421	0	1	0.00711238	3.80822	0.000517	successful ranked
369	L-Dopa	LC-ESI-ITFT (LTQ Orbitrap XL; Thermo Scientfic)	negative	197.069	C9H11NO4	2	2	2	12	10	0	1.06667	0	1	0	0	1	0.0666667	9.5371	0.0002051	successful ranked
370	L-Dopa	LC-ESI-ITFT (LTQ Orbitrap XL; Thermo Scientfic)	negative	197.069	C9H11NO4	2	2	2	24	5	0	1.33333	0	1	0	0	1	0.333333	7.91237	0.0001532	successful ranked
371	L-Dopa	LC-ESI-ITFT (LTQ Orbitrap XL; Thermo Scientfic)	negative	197.069	C9H11NO4	1	1	2	11	1	0	0.999997	-1	0	-1	-1	-1	-1	0	0	No mother-daughter relation is found for all the precursor formula.
372	L-Dopa	LC-ESI-ITFT	negative	197.069	C9H11NO4	1	1	2	14	11	0	0.999997	-1	0	-1	-1	-1	-1	8.05867	0.0001804	No mother-daughter relation is found for all the precursor formula.
373	L-Dopa	LC-ESI-ITFT	negative	197.069	C9H11NO4	1	1	2	14	10	0	0.999997	-1	0	-1	-1	-1	-1	8.43987	0.00017	No mother-daughter relation is found for all the precursor formula.
374	L-Dopa	LC-ESI-ITFT	negative	197.069	C9H11NO4	1	1	2	5	4	0	0.999997	-1	0	-1	-1	-1	-1	5.73295	0.0001017	No mother-daughter relation is found for all the precursor formula.
375	L-Dopa	LC-ESI-ITFT	negative	197.069	C9H11NO4	2	2	2	12	10	0	1.06667	0	1	0	0	1	0.0666667	9.5371	0.0001762	successful ranked
376	L-Dopa	LC-ESI-ITFT	positive	197.069	C9H11NO4	1	1	2	9	6	0	0.999997	-1	0	-1	-1	-1	-1	7.1267	0.0001375	No mother-daughter relation is found for all the precursor formula.
377	L-Dopa	LC-ESI-ITFT	positive	197.069	C9H11NO4	1	1	2	5	6	0	0.999997	-1	0	-1	-1	-1	-1	5.65909	0	No mother-daughter relation is found for all the precursor formula.
378	L-Lysine	LC-ESI-ITFT (LTQ Orbitrap XL; Thermo Scientfic)	positive	146.106	C6H14N2O2	1	1	1	98	18	-1	0.999997	-1	-1	-1	-1	-1	-1	3.48346	-1	Single candidate matches with the answer.
379	L-Lysine	LC-ESI-ITFT (LTQ Orbitrap XL; Thermo Scientfic)	positive	146.106	C6H14N2O2	1	1	1	9	3	-1	0.999997	-1	-1	-1	-1	-1	-1	10.7841	-1	Single candidate matches with the answer.
380	L-Lysine	LC-ESI-ITFT (LTQ Orbitrap XL; Thermo Scientfic)	positive	146.106	C6H14N2O2	1	1	1	4	4	-1	0.999997	-1	-1	-1	-1	-1	-1	11.2251	-1	Single candidate matches with the answer.
381	L-Lysine	LC-ESI-ITFT (LTQ Orbitrap XL; Thermo Scientfic)	positive	146.106	C6H14N2O2	1	1	1	9	5	-1	0.999997	-1	-1	-1	-1	-1	-1	12.4848	-1	Single candidate matches with the answer.
382	L-Lysine	LC-ESI-ITFT (LTQ Orbitrap XL; Thermo Scientfic)	positive	146.106	C6H14N2O2	1	1	1	187	12	-1	0.999997	-1	-1	-1	-1	-1	-1	1.89629	-1	Single candidate matches with the answer.
383	L-Lysine	LC-ESI-ITFT (LTQ Orbitrap XL; Thermo Scientfic)	positive	146.106	C6H14N2O2	1	1	1	20	13	-1	0.999997	-1	-1	-1	-1	-1	-1	7.54119	-1	Single candidate matches with the answer.
384	L-Lysine	LC-ESI-ITFT (LTQ Orbitrap XL; Thermo Scientfic)	positive	146.106	C6H14N2O2	1	1	1	4	4	-1	0.999997	-1	-1	-1	-1	-1	-1	11.4206	-1	Single candidate matches with the answer.
385	L-Lysine	LC-ESI-ITFT (LTQ Orbitrap XL; Thermo Scientfic)	positive	146.106	C6H14N2O2	1	1	1	17	7	-1	0.999997	-1	-1	-1	-1	-1	-1	5.35049	-1	Single candidate matches with the answer.
386	L-Lysine	LC-ESI-ITFT	positive	146.106	C6H14N2O2	1	1	1	9	7	-1	0.999997	-1	-1	-1	-1	-1	-1	6.8678	-1	Single candidate matches with the answer.
387	L-Lysine	LC-ESI-ITFT	positive	146.106	C6H14N2O2	1	1	1	9	2	-1	0.999997	-1	-1	-1	-1	-1	-1	10.7841	-1	Single candidate matches with the answer.
388	L-Lysine	LC-ESI-ITFT	positive	146.106	C6H14N2O2	1	1	1	4	4	-1	0.999997	-1	-1	-1	-1	-1	-1	11.2251	-1	Single candidate matches with the answer.
389	L-Lysine	LC-ESI-ITFT	positive	146.106	C6H14N2O2	1	1	1	9	5	-1	0.999997	-1	-1	-1	-1	-1	-1	12.4848	-1	Single candidate matches with the answer.
390	L-Lysine	LC-ESI-ITFT	positive	146.106	C6H14N2O2	1	1	1	4	4	-1	0.999997	-1	-1	-1	-1	-1	-1	11.4206	-1	Single candidate matches with the answer.
391	L-Serine	LC-ESI-ITFT (LTQ Orbitrap XL; Thermo Scientfic)	positive	105.043	C3H7NO3	1	1	1	120	7	-1	0.999998	-1	-1	-1	-1	-1	-1	0.491629	-1	Single candidate matches with the answer.
392	L-Serine	LC-ESI-ITFT (LTQ Orbitrap XL; Thermo Scientfic)	positive	105.043	C3H7NO3	1	1	1	3	3	-1	0.999998	-1	-1	-1	-1	-1	-1	9.96505	-1	Single candidate matches with the answer.
393	L-Serine	LC-ESI-ITFT (LTQ Orbitrap XL; Thermo Scientfic)	positive	105.043	C3H7NO3	1	1	1	4	4	-1	0.999998	-1	-1	-1	-1	-1	-1	7.80955	-1	Single candidate matches with the answer.
394	L-Serine	LC-ESI-ITFT (LTQ Orbitrap XL; Thermo Scientfic)	positive	105.043	C3H7NO3	1	1	1	3	1	-1	0.999998	-1	-1	-1	-1	-1	-1	0	-1	Single candidate matches with the answer.
395	L-Serine	LC-ESI-ITFT (LTQ Orbitrap XL; Thermo Scientfic)	positive	105.043	C3H7NO3	1	1	1	131	4	-1	0.999998	-1	-1	-1	-1	-1	-1	0.768458	-1	Single candidate matches with the answer.
396	L-Serine	LC-ESI-ITFT (LTQ Orbitrap XL; Thermo Scientfic)	positive	105.043	C3H7NO3	1	1	1	4	3	-1	0.999998	-1	-1	-1	-1	-1	-1	7.7397	-1	Single candidate matches with the answer.
397	L-Serine	LC-ESI-ITFT (LTQ Orbitrap XL; Thermo Scientfic)	positive	105.043	C3H7NO3	1	1	1	23	6	-1	0.999998	-1	-1	-1	-1	-1	-1	2.93473	-1	Single candidate matches with the answer.
398	L-Serine	LC-ESI-ITFT (LTQ Orbitrap XL; Thermo Scientfic)	positive	105.043	C3H7NO3	1	1	1	17	1	-1	0.999998	-1	-1	-1	-1	-1	-1	0	-1	Single candidate matches with the answer.
399	L-Serine	LC-ESI-ITFT (LTQ Orbitrap XL; Thermo Scientfic)	negative	105.043	C3H7NO3	1	1	1	388	3	-1	0.999998	-1	-1	-1	-1	-1	-1	0.372852	-1	Single candidate matches with the answer.
400	L-Serine	LC-ESI-ITFT (LTQ Orbitrap XL; Thermo Scientfic)	negative	105.043	C3H7NO3	1	1	1	3	4	-1	0.999998	-1	-1	-1	-1	-1	-1	14.1642	-1	Single candidate matches with the answer.
401	L-Serine	LC-ESI-ITFT (LTQ Orbitrap XL; Thermo Scientfic)	negative	105.043	C3H7NO3	1	1	1	5	1	-1	0.999998	-1	-1	-1	-1	-1	-1	0	-1	Single candidate matches with the answer.
402	L-Serine	LC-ESI-ITFT (LTQ Orbitrap XL; Thermo Scientfic)	negative	105.043	C3H7NO3	1	1	1	480	3	-1	0.999998	-1	-1	-1	-1	-1	-1	0.518764	-1	Single candidate matches with the answer.
403	L-Serine	LC-ESI-ITFT (LTQ Orbitrap XL; Thermo Scientfic)	negative	105.043	C3H7NO3	1	1	1	3	1	-1	0.999998	-1	-1	-1	-1	-1	-1	0	-1	Single candidate matches with the answer.
404	L-Serine	LC-ESI-ITFT (LTQ Orbitrap XL; Thermo Scientfic)	negative	105.043	C3H7NO3	1	1	1	13	2	-1	0.999998	-1	-1	-1	-1	-1	-1	9.19108	-1	Single candidate matches with the answer.
405	L-Serine	LC-ESI-ITFT	negative	105.043	C3H7NO3	1	1	1	3	4	-1	0.999998	-1	-1	-1	-1	-1	-1	14.1642	-1	Single candidate matches with the answer.
406	L-Serine	LC-ESI-ITFT	positive	105.043	C3H7NO3	1	1	1	3	3	-1	0.999998	-1	-1	-1	-1	-1	-1	9.96505	-1	Single candidate matches with the answer.
407	L-Serine	LC-ESI-ITFT	positive	105.043	C3H7NO3	1	1	1	4	4	-1	0.999998	-1	-1	-1	-1	-1	-1	7.80955	-1	Single candidate matches with the answer.
408	L-Serine	LC-ESI-ITFT	positive	105.043	C3H7NO3	1	1	1	4	3	-1	0.999998	-1	-1	-1	-1	-1	-1	7.7397	-1	Single candidate matches with the answer.
409	L-Aspartic acid	LC-ESI-ITFT (LTQ Orbitrap XL; Thermo Scientfic)	positive	133.038	C4H7NO4	1	1	1	125	9	-1	0.999998	-1	-1	-1	-1	-1	-1	1.27781	-1	Single candidate matches with the answer.
410	L-Aspartic acid	LC-ESI-ITFT (LTQ Orbitrap XL; Thermo Scientfic)	positive	133.038	C4H7NO4	1	1	1	5	5	-1	0.999998	-1	-1	-1	-1	-1	-1	11.6432	-1	Single candidate matches with the answer.
411	L-Aspartic acid	LC-ESI-ITFT (LTQ Orbitrap XL; Thermo Scientfic)	positive	133.038	C4H7NO4	1	1	1	16	8	-1	0.999998	-1	-1	-1	-1	-1	-1	4.54052	-1	Single candidate matches with the answer.
412	L-Aspartic acid	LC-ESI-ITFT (LTQ Orbitrap XL; Thermo Scientfic)	positive	133.038	C4H7NO4	1	1	1	9	5	-1	0.999998	-1	-1	-1	-1	-1	-1	7.00918	-1	Single candidate matches with the answer.
413	L-Aspartic acid	LC-ESI-ITFT (LTQ Orbitrap XL; Thermo Scientfic)	positive	133.038	C4H7NO4	1	1	1	179	25	-1	0.999998	-1	-1	-1	-1	-1	-1	1.09045	-1	Single candidate matches with the answer.
414	L-Aspartic acid	LC-ESI-ITFT (LTQ Orbitrap XL; Thermo Scientfic)	positive	133.038	C4H7NO4	1	1	1	5	4	-1	0.999998	-1	-1	-1	-1	-1	-1	9.95347	-1	Single candidate matches with the answer.
415	L-Aspartic acid	LC-ESI-ITFT (LTQ Orbitrap XL; Thermo Scientfic)	positive	133.038	C4H7NO4	1	1	1	24	8	-1	0.999998	-1	-1	-1	-1	-1	-1	3.12894	-1	Single candidate matches with the answer.
416	L-Aspartic acid	LC-ESI-ITFT (LTQ Orbitrap XL; Thermo Scientfic)	positive	133.038	C4H7NO4	1	1	1	12	3	-1	0.999998	-1	-1	-1	-1	-1	-1	3.70729	-1	Single candidate matches with the answer.
417	L-Aspartic acid	LC-ESI-ITFT (LTQ Orbitrap XL; Thermo Scientfic)	negative	133.038	C4H7NO4	1	1	1	538	38	-1	0.999998	-1	-1	-1	-1	-1	-1	0.75191	-1	Single candidate matches with the answer.
418	L-Aspartic acid	LC-ESI-ITFT (LTQ Orbitrap XL; Thermo Scientfic)	negative	133.038	C4H7NO4	1	1	1	4	5	-1	0.999998	-1	-1	-1	-1	-1	-1	10.5568	-1	Single candidate matches with the answer.
419	L-Aspartic acid	LC-ESI-ITFT (LTQ Orbitrap XL; Thermo Scientfic)	negative	133.038	C4H7NO4	1	1	1	5	1	-1	0.999998	-1	-1	-1	-1	-1	-1	0	-1	Single candidate matches with the answer.
420	L-Aspartic acid	LC-ESI-ITFT (LTQ Orbitrap XL; Thermo Scientfic)	negative	133.038	C4H7NO4	1	1	1	444	42	-1	0.999998	-1	-1	-1	-1	-1	-1	0.766211	-1	Single candidate matches with the answer.
421	L-Aspartic acid	LC-ESI-ITFT (LTQ Orbitrap XL; Thermo Scientfic)	negative	133.038	C4H7NO4	1	1	1	3	4	-1	0.999998	-1	-1	-1	-1	-1	-1	12.6209	-1	Single candidate matches with the answer.
422	L-Aspartic acid	LC-ESI-ITFT (LTQ Orbitrap XL; Thermo Scientfic)	negative	133.038	C4H7NO4	1	1	1	8	1	-1	0.999998	-1	-1	-1	-1	-1	-1	0	-1	Single candidate matches with the answer.
423	L-Aspartic acid	LC-ESI-ITFT	negative	133.038	C4H7NO4	1	1	1	4	5	-1	0.999998	-1	-1	-1	-1	-1	-1	10.5568	-1	Single candidate matches with the answer.
424	L-Aspartic acid	LC-ESI-ITFT	negative	133.038	C4H7NO4	1	1	1	3	4	-1	0.999998	-1	-1	-1	-1	-1	-1	12.6209	-1	Single candidate matches with the answer.
425	L-Aspartic acid	LC-ESI-ITFT	positive	133.038	C4H7NO4	1	1	1	16	8	-1	0.999998	-1	-1	-1	-1	-1	-1	4.54052	-1	Single candidate matches with the answer.
426	L-Aspartic acid	LC-ESI-ITFT	positive	133.038	C4H7NO4	1	1	1	9	5	-1	0.999998	-1	-1	-1	-1	-1	-1	7.00918	-1	Single candidate matches with the answer.
427	L-Aspartic acid	LC-ESI-ITFT	positive	133.038	C4H7NO4	1	1	1	5	4	-1	0.999998	-1	-1	-1	-1	-1	-1	9.95347	-1	Single candidate matches with the answer.
428	Isocitric acid	LC-ESI-ITFT (LTQ Orbitrap XL; Thermo Scientfic)	positive	192.027	C6H8O7	1	1	1	565	30	-1	0.999998	-1	-1	-1	-1	-1	-1	0.583102	-1	Single candidate matches with the answer.
429	Isocitric acid	LC-ESI-ITFT (LTQ Orbitrap XL; Thermo Scientfic)	positive	192.027	C6H8O7	1	1	1	40	29	-1	0.999998	-1	-1	-1	-1	-1	-1	3.81504	-1	Single candidate matches with the answer.
430	Isocitric acid	LC-ESI-ITFT (LTQ Orbitrap XL; Thermo Scientfic)	positive	192.027	C6H8O7	1	1	1	18	6	-1	0.999998	-1	-1	-1	-1	-1	-1	5.7535	-1	Single candidate matches with the answer.
431	Isocitric acid	LC-ESI-ITFT (LTQ Orbitrap XL; Thermo Scientfic)	positive	192.027	C6H8O7	1	1	1	29	12	-1	0.999998	-1	-1	-1	-1	-1	-1	7.99822	-1	Single candidate matches with the answer.
432	Isocitric acid	LC-ESI-ITFT (LTQ Orbitrap XL; Thermo Scientfic)	negative	192.027	C6H8O7	1	1	1	573	109	-1	0.999998	-1	-1	-1	-1	-1	-1	0.929157	-1	Single candidate matches with the answer.
433	Isocitric acid	LC-ESI-ITFT (LTQ Orbitrap XL; Thermo Scientfic)	negative	192.027	C6H8O7	1	1	1	3	4	-1	0.999998	-1	-1	-1	-1	-1	-1	8.99061	-1	Single candidate matches with the answer.
434	Isocitric acid	LC-ESI-ITFT (LTQ Orbitrap XL; Thermo Scientfic)	negative	192.027	C6H8O7	1	1	1	8	5	-1	0.999998	-1	-1	-1	-1	-1	-1	6.77517	-1	Single candidate matches with the answer.
435	Isocitric acid	LC-ESI-ITFT (LTQ Orbitrap XL; Thermo Scientfic)	negative	192.027	C6H8O7	1	1	1	9	2	-1	0.999998	-1	-1	-1	-1	-1	-1	0	-1	Single candidate matches with the answer.
436	Isocitric acid	LC-ESI-ITFT	negative	192.027	C6H8O7	1	1	1	3	4	-1	0.999998	-1	-1	-1	-1	-1	-1	8.99061	-1	Single candidate matches with the answer.
437	Isocitric acid	LC-ESI-ITFT	negative	192.027	C6H8O7	1	1	1	8	5	-1	0.999998	-1	-1	-1	-1	-1	-1	6.77517	-1	Single candidate matches with the answer.
438	Isocitric acid	LC-ESI-ITFT	positive	192.027	C6H8O7	1	1	1	40	27	-1	0.999998	-1	-1	-1	-1	-1	-1	3.81504	-1	Single candidate matches with the answer.
439	Isocitric acid	LC-ESI-ITFT	positive	192.027	C6H8O7	1	1	1	18	6	-1	0.999998	-1	-1	-1	-1	-1	-1	5.7535	-1	Single candidate matches with the answer.
440	Isocitric acid	LC-ESI-ITFT	positive	192.027	C6H8O7	1	1	1	29	11	-1	0.999998	-1	-1	-1	-1	-1	-1	7.99822	-1	Single candidate matches with the answer.
441	Inosine	LC-ESI-ITFT (LTQ Orbitrap XL; Thermo Scientfic)	positive	268.081	C10H12N4O5	1	1	2	194	25	7	1.07895	0	1	0.35	1	1	0.0578947	3.73765	0.0003637	successful ranked
442	Inosine	LC-ESI-ITFT (LTQ Orbitrap XL; Thermo Scientfic)	positive	268.081	C10H12N4O5	2	2	2	7	5	1	1.33333	0	0	0.333333	1	0	0	36.6	0.0002014	successful ranked
443	Inosine	LC-ESI-ITFT (LTQ Orbitrap XL; Thermo Scientfic)	positive	268.081	C10H12N4O5	1	1	2	5	2	0	0.999996	-1	0	-1	-1	-1	-1	28.218	0	No mother-daughter relation is found for all the precursor formula.
444	Inosine	LC-ESI-ITFT (LTQ Orbitrap XL; Thermo Scientfic)	positive	268.081	C10H12N4O5	1	1	2	5	2	0	0.999996	-1	0	-1	-1	-1	-1	21.722	0.0001311	No mother-daughter relation is found for all the precursor formula.
445	Inosine	LC-ESI-ITFT (LTQ Orbitrap XL; Thermo Scientfic)	positive	268.081	C10H12N4O5	1	1	2	232	33	7	1.03077	0	1	0.269231	1	1	0.00923077	3.01124	0.0004025	successful ranked
446	Inosine	LC-ESI-ITFT (LTQ Orbitrap XL; Thermo Scientfic)	positive	268.081	C10H12N4O5	1	1	2	17	18	3	1.19048	0	1	0.428571	1	1	0.142857	31.1266	0.0002347	successful ranked
447	Inosine	LC-ESI-ITFT (LTQ Orbitrap XL; Thermo Scientfic)	positive	268.081	C10H12N4O5	1	1	2	6	5	0	0.999996	-1	0	-1	-1	-1	-1	50.5554	0	No mother-daughter relation is found for all the precursor formula.
448	Inosine	LC-ESI-ITFT (LTQ Orbitrap XL; Thermo Scientfic)	positive	268.081	C10H12N4O5	1	1	2	7	3	1	2	0	1	0.5	1	1	1	20.6798	0.0001729	successful ranked
449	Inosine	LC-ESI-ITFT (LTQ Orbitrap XL; Thermo Scientfic)	negative	268.081	C10H12N4O5	1	1	2	323	29	13	1.13834	0	1	0.565217	1	1	0.0750988	4.97493	0.0003591	successful ranked
450	Inosine	LC-ESI-ITFT (LTQ Orbitrap XL; Thermo Scientfic)	negative	268.081	C10H12N4O5	1	1	2	4	5	0	0.999996	-1	0	-1	-1	-1	-1	66.8801	0.0001498	No mother-daughter relation is found for all the precursor formula.
451	Inosine	LC-ESI-ITFT (LTQ Orbitrap XL; Thermo Scientfic)	negative	268.081	C10H12N4O5	1	1	2	6	4	0	0.999996	-1	0	-1	-1	-1	-1	21.7627	0.0001254	No mother-daughter relation is found for all the precursor formula.
452	Inosine	LC-ESI-ITFT (LTQ Orbitrap XL; Thermo Scientfic)	negative	268.081	C10H12N4O5	1	1	2	5	3	1	1.33333	0	1	0.333333	1	1	0.333333	31.5739	0.0001119	successful ranked
453	Inosine	LC-ESI-ITFT (LTQ Orbitrap XL; Thermo Scientfic)	negative	268.081	C10H12N4O5	1	1	2	290	25	10	1.1039	0	1	0.454545	1	1	0.0692641	6.24592	0.0004493	successful ranked
454	Inosine	LC-ESI-ITFT (LTQ Orbitrap XL; Thermo Scientfic)	negative	268.081	C10H12N4O5	1	1	2	6	4	0	0.999996	-1	0	-1	-1	-1	-1	21.8184	0.000171	No mother-daughter relation is found for all the precursor formula.
455	Inosine	LC-ESI-ITFT (LTQ Orbitrap XL; Thermo Scientfic)	negative	268.081	C10H12N4O5	1	1	2	22	9	1	1.03571	0	1	0.125	1	1	0.0357143	12.9639	0.0001935	successful ranked
456	Inosine	LC-ESI-ITFT	negative	268.081	C10H12N4O5	1	1	2	4	5	0	0.999996	-1	0	-1	-1	-1	-1	66.8801	0.0001505	No mother-daughter relation is found for all the precursor formula.
457	Inosine	LC-ESI-ITFT	negative	268.081	C10H12N4O5	1	1	2	6	3	0	0.999996	-1	0	-1	-1	-1	-1	21.7627	0	No mother-daughter relation is found for all the precursor formula.
458	Inosine	LC-ESI-ITFT	negative	268.081	C10H12N4O5	1	1	2	6	3	0	0.999996	-1	0	-1	-1	-1	-1	21.8184	0.0001214	No mother-daughter relation is found for all the precursor formula.
459	Inosine	LC-ESI-ITFT	positive	268.081	C10H12N4O5	1	1	2	5	2	0	0.999996	-1	0	-1	-1	-1	-1	28.218	0	No mother-daughter relation is found for all the precursor formula.
460	Inosine	LC-ESI-ITFT	positive	268.081	C10H12N4O5	1	1	2	17	18	3	1.19048	0	1	0.428571	1	1	0.142857	31.1266	0.0002631	successful ranked
461	Inosine	LC-ESI-ITFT	positive	268.081	C10H12N4O5	1	1	2	7	3	1	2	0	1	0.5	1	1	1	20.6798	0.0001673	successful ranked
462	Oxoglutaric acid	LC-ESI-ITFT (LTQ Orbitrap XL; Thermo Scientfic)	negative	146.022	C5H6O5	1	1	1	664	31	-1	0.999998	-1	-1	-1	-1	-1	-1	0.573895	-1	Single candidate matches with the answer.
463	Oxoglutaric acid	LC-ESI-ITFT (LTQ Orbitrap XL; Thermo Scientfic)	negative	146.022	C5H6O5	1	1	1	783	64	-1	0.999998	-1	-1	-1	-1	-1	-1	0.834855	-1	Single candidate matches with the answer.
464	Oxoglutaric acid	LC-ESI-ITFT (LTQ Orbitrap XL; Thermo Scientfic)	negative	146.022	C5H6O5	1	1	1	9	4	-1	0.999998	-1	-1	-1	-1	-1	-1	4.14783	-1	Single candidate matches with the answer.
465	Ornithine	LC-ESI-ITFT (LTQ Orbitrap XL; Thermo Scientfic)	positive	132.09	C5H12N2O2	1	1	1	92	22	-1	0.999997	-1	-1	-1	-1	-1	-1	3.12908	-1	Single candidate matches with the answer.
466	Ornithine	LC-ESI-ITFT (LTQ Orbitrap XL; Thermo Scientfic)	positive	132.09	C5H12N2O2	1	1	1	5	4	-1	0.999997	-1	-1	-1	-1	-1	-1	13.4196	-1	Single candidate matches with the answer.
467	Ornithine	LC-ESI-ITFT (LTQ Orbitrap XL; Thermo Scientfic)	positive	132.09	C5H12N2O2	1	1	1	5	4	-1	0.999997	-1	-1	-1	-1	-1	-1	7.51949	-1	Single candidate matches with the answer.
468	Ornithine	LC-ESI-ITFT (LTQ Orbitrap XL; Thermo Scientfic)	positive	132.09	C5H12N2O2	1	1	1	16	3	-1	0.999997	-1	-1	-1	-1	-1	-1	11.3105	-1	Single candidate matches with the answer.
469	Ornithine	LC-ESI-ITFT (LTQ Orbitrap XL; Thermo Scientfic)	positive	132.09	C5H12N2O2	1	1	1	100	22	-1	0.999997	-1	-1	-1	-1	-1	-1	2.77936	-1	Single candidate matches with the answer.
470	Ornithine	LC-ESI-ITFT (LTQ Orbitrap XL; Thermo Scientfic)	positive	132.09	C5H12N2O2	1	1	1	8	5	-1	0.999997	-1	-1	-1	-1	-1	-1	7.19106	-1	Single candidate matches with the answer.
471	Ornithine	LC-ESI-ITFT (LTQ Orbitrap XL; Thermo Scientfic)	positive	132.09	C5H12N2O2	1	1	1	5	4	-1	0.999997	-1	-1	-1	-1	-1	-1	7.46054	-1	Single candidate matches with the answer.
472	Ornithine	LC-ESI-ITFT (LTQ Orbitrap XL; Thermo Scientfic)	negative	132.09	C5H12N2O2	1	1	1	638	44	-1	0.999997	-1	-1	-1	-1	-1	-1	0.721618	-1	Single candidate matches with the answer.
473	Ornithine	LC-ESI-ITFT (LTQ Orbitrap XL; Thermo Scientfic)	negative	132.09	C5H12N2O2	1	1	1	3	1	-1	0.999997	-1	-1	-1	-1	-1	-1	0	-1	Single candidate matches with the answer.
474	Ornithine	LC-ESI-ITFT (LTQ Orbitrap XL; Thermo Scientfic)	negative	132.09	C5H12N2O2	1	1	1	11	2	-1	0.999997	-1	-1	-1	-1	-1	-1	0	-1	Single candidate matches with the answer.
475	Ornithine	LC-ESI-ITFT	negative	132.09	C5H12N2O2	1	1	1	3	1	-1	0.999997	-1	-1	-1	-1	-1	-1	0	-1	Single candidate matches with the answer.
476	Ornithine	LC-ESI-ITFT	negative	132.09	C5H12N2O2	1	1	1	11	2	-1	0.999997	-1	-1	-1	-1	-1	-1	0	-1	Single candidate matches with the answer.
477	Ornithine	LC-ESI-ITFT	positive	132.09	C5H12N2O2	1	1	1	5	4	-1	0.999997	-1	-1	-1	-1	-1	-1	13.4196	-1	Single candidate matches with the answer.
478	Ornithine	LC-ESI-ITFT	positive	132.09	C5H12N2O2	1	1	1	5	4	-1	0.999997	-1	-1	-1	-1	-1	-1	7.51949	-1	Single candidate matches with the answer.
479	Ornithine	LC-ESI-ITFT	positive	132.09	C5H12N2O2	1	1	1	16	3	-1	0.999997	-1	-1	-1	-1	-1	-1	11.3105	-1	Single candidate matches with the answer.
480	Ornithine	LC-ESI-ITFT	positive	132.09	C5H12N2O2	1	1	1	8	5	-1	0.999997	-1	-1	-1	-1	-1	-1	7.19106	-1	Single candidate matches with the answer.
481	Ornithine	LC-ESI-ITFT	positive	132.09	C5H12N2O2	1	1	1	5	4	-1	0.999997	-1	-1	-1	-1	-1	-1	7.46054	-1	Single candidate matches with the answer.
482	NADP	LC-ESI-ITFT (LTQ Orbitrap XL; Thermo Scientfic)	positive	744.083	C21H29N7O17P3	1	1	2	445	30	9	1.11579	1	1	0.45	1	1	0.0947368	6.63619	0.0003997	successful ranked
483	NADP	LC-ESI-ITFT (LTQ Orbitrap XL; Thermo Scientfic)	positive	744.083	C21H29N7O17P3	1	1	2	27	14	5	1.08974	1	1	0.384615	1	1	0.0897436	27.5783	0.0002187	successful ranked
484	NADP	LC-ESI-ITFT (LTQ Orbitrap XL; Thermo Scientfic)	positive	744.083	C21H29N7O17P3	1	1	2	17	9	3	1.08333	1	1	0.333333	1	1	0.0277778	47.8259	0.0001832	successful ranked
485	NADP	LC-ESI-ITFT (LTQ Orbitrap XL; Thermo Scientfic)	positive	744.083	C21H29N7O17P3	1	1	2	17	11	3	1.10714	0	1	0.375	1	1	0.0714286	28.4322	0.0001942	successful ranked
486	NADP	LC-ESI-ITFT (LTQ Orbitrap XL; Thermo Scientfic)	positive	744.083	C21H29N7O17P3	1	1	2	285	23	6	1.09167	1	1	0.375	1	1	0.05	8.62931	0.0002785	successful ranked
487	NADP	LC-ESI-ITFT (LTQ Orbitrap XL; Thermo Scientfic)	positive	744.083	C21H29N7O17P3	1	2	2	36	15	1	1.02222	0	0	0.1	1	0	0	21.1866	0.0002113	successful ranked
488	NADP	LC-ESI-ITFT (LTQ Orbitrap XL; Thermo Scientfic)	positive	744.083	C21H29N7O17P3	1	1	2	39	19	3	1.02857	1	1	0.2	1	1	0.0190476	24.6903	0.0002561	successful ranked
489	NADP	LC-ESI-ITFT (LTQ Orbitrap XL; Thermo Scientfic)	positive	744.083	C21H29N7O17P3	1	1	2	20	11	3	1.06667	1	1	0.3	1	1	0.0444444	27.4882	0.0001943	successful ranked
490	NADP	LC-ESI-ITFT (LTQ Orbitrap XL; Thermo Scientfic)	negative	744.083	C21H29N7O17P3	1	1	2	207	29	8	1.08201	1	1	0.285714	1	1	0.0608466	8.08511	0.000352	successful ranked
491	NADP	LC-ESI-ITFT (LTQ Orbitrap XL; Thermo Scientfic)	negative	744.083	C21H29N7O17P3	1	1	2	27	16	9	1.17143	1	1	0.6	1	1	0.104762	40.9059	0.0002564	successful ranked
492	NADP	LC-ESI-ITFT (LTQ Orbitrap XL; Thermo Scientfic)	negative	744.083	C21H29N7O17P3	1	1	2	39	23	5	1.02597	1	1	0.227273	1	1	0.017316	22.1594	0.0003024	successful ranked
493	NADP	LC-ESI-ITFT (LTQ Orbitrap XL; Thermo Scientfic)	negative	744.083	C21H29N7O17P3	1	1	2	6	4	0	1	-1	0	-1	-1	-1	-1	76.2158	0.0001109	No mother-daughter relation is found for all the precursor formula.
494	NADP	LC-ESI-ITFT (LTQ Orbitrap XL; Thermo Scientfic)	negative	744.083	C21H29N7O17P3	1	1	2	178	26	7	1.09058	1	1	0.291667	1	1	0.0688406	9.11405	0.0002983	successful ranked
495	NADP	LC-ESI-ITFT (LTQ Orbitrap XL; Thermo Scientfic)	negative	744.083	C21H29N7O17P3	1	1	2	41	23	11	1.13684	1	1	0.55	1	1	0.136842	21.7888	0.0003409	successful ranked
496	NADP	LC-ESI-ITFT (LTQ Orbitrap XL; Thermo Scientfic)	negative	744.083	C21H29N7O17P3	1	1	2	8	3	0	1	-1	0	-1	-1	-1	-1	59.5034	9.13e-05	No mother-daughter relation is found for all the precursor formula.
497	NADP	LC-ESI-ITFT (LTQ Orbitrap XL; Thermo Scientfic)	negative	744.083	C21H29N7O17P3	1	1	2	7	4	0	1	-1	0	-1	-1	-1	-1	61.8018	9.14e-05	No mother-daughter relation is found for all the precursor formula.
498	Sorbitol	LC-ESI-ITFT	positive	182.079	C6H14O6	1	1	3	15	13	12	1.82051	0	1	0.923077	1	1	0.769231	6.51479	0.0003183	successful ranked
499	Taurine	LC-ESI-ITFT (LTQ Orbitrap XL; Thermo Scientfic)	positive	125.015	C2H7NO3S	1	1	2	147	6	0	0.999998	-1	0	-1	-1	-1	-1	2.24908	0.000134	No mother-daughter relation is found for all the precursor formula.
500	Taurine	LC-ESI-ITFT (LTQ Orbitrap XL; Thermo Scientfic)	positive	125.015	C2H7NO3S	1	1	2	6	5	0	0.999998	-1	0	-1	-1	-1	-1	7.43987	0	No mother-daughter relation is found for all the precursor formula.
501	Taurine	LC-ESI-ITFT (LTQ Orbitrap XL; Thermo Scientfic)	positive	125.015	C2H7NO3S	1	1	2	4	3	0	0.999998	-1	0	-1	-1	-1	-1	9.61115	0.0001337	No mother-daughter relation is found for all the precursor formula.
502	Taurine	LC-ESI-ITFT (LTQ Orbitrap XL; Thermo Scientfic)	positive	125.015	C2H7NO3S	1	1	2	6	5	1	2	0	1	0.5	1	1	1	7.79462	0.0002014	successful ranked
503	Taurine	LC-ESI-ITFT (LTQ Orbitrap XL; Thermo Scientfic)	positive	125.015	C2H7NO3S	1	1	2	322	22	2	1.01471	0	1	0.117647	1	1	0.0147059	1.06975	0.000239	successful ranked
504	Taurine	LC-ESI-ITFT (LTQ Orbitrap XL; Thermo Scientfic)	positive	125.015	C2H7NO3S	1	1	2	3	2	0	0.999998	-1	0	-1	-1	-1	-1	8.73175	0	No mother-daughter relation is found for all the precursor formula.
505	Taurine	LC-ESI-ITFT (LTQ Orbitrap XL; Thermo Scientfic)	positive	125.015	C2H7NO3S	1	1	2	4	3	0	0.999998	-1	0	-1	-1	-1	-1	4.22631	0.0001376	No mother-daughter relation is found for all the precursor formula.
506	Taurine	LC-ESI-ITFT (LTQ Orbitrap XL; Thermo Scientfic)	positive	125.015	C2H7NO3S	1	1	2	4	2	0	0.999998	-1	0	-1	-1	-1	-1	12.5794	0.0001319	No mother-daughter relation is found for all the precursor formula.
507	Taurine	LC-ESI-ITFT (LTQ Orbitrap XL; Thermo Scientfic)	negative	125.015	C2H7NO3S	1	2	2	319	5	2	1.5	0	0	0.5	1	0	0	1.6696	0.0001868	successful ranked
508	Taurine	LC-ESI-ITFT (LTQ Orbitrap XL; Thermo Scientfic)	negative	125.015	C2H7NO3S	1	1	2	5	6	0	0.999998	-1	0	-1	-1	-1	-1	6.27826	0	No mother-daughter relation is found for all the precursor formula.
509	Taurine	LC-ESI-ITFT (LTQ Orbitrap XL; Thermo Scientfic)	negative	125.015	C2H7NO3S	1	1	2	4	2	0	0.999998	-1	0	-1	-1	-1	-1	31.0359	0	No mother-daughter relation is found for all the precursor formula.
510	Taurine	LC-ESI-ITFT (LTQ Orbitrap XL; Thermo Scientfic)	negative	125.015	C2H7NO3S	1	1	2	5	1	0	0.999998	-1	0	-1	-1	-1	-1	0	0	No mother-daughter relation is found for all the precursor formula.
511	Taurine	LC-ESI-ITFT (LTQ Orbitrap XL; Thermo Scientfic)	negative	125.015	C2H7NO3S	1	2	2	287	4	1	1.33333	0	0	0.333333	1	0	0	2.6299	0.0001382	successful ranked
512	Taurine	LC-ESI-ITFT (LTQ Orbitrap XL; Thermo Scientfic)	negative	125.015	C2H7NO3S	1	1	2	4	5	0	0.999998	-1	0	-1	-1	-1	-1	10.2926	0	No mother-daughter relation is found for all the precursor formula.
513	Taurine	LC-ESI-ITFT (LTQ Orbitrap XL; Thermo Scientfic)	negative	125.015	C2H7NO3S	1	1	2	3	2	0	0.999998	-1	0	-1	-1	-1	-1	31.0969	0	No mother-daughter relation is found for all the precursor formula.
514	Taurine	LC-ESI-ITFT (LTQ Orbitrap XL; Thermo Scientfic)	negative	125.015	C2H7NO3S	1	1	2	5	1	0	0.999998	-1	0	-1	-1	-1	-1	0	0	No mother-daughter relation is found for all the precursor formula.
515	Taurine	LC-ESI-ITFT	negative	125.015	C2H7NO3S	1	1	2	5	6	0	0.999998	-1	0	-1	-1	-1	-1	6.27826	0	No mother-daughter relation is found for all the precursor formula.
516	Taurine	LC-ESI-ITFT	negative	125.015	C2H7NO3S	1	1	2	4	2	0	0.999998	-1	0	-1	-1	-1	-1	31.0359	0	No mother-daughter relation is found for all the precursor formula.
517	Taurine	LC-ESI-ITFT	negative	125.015	C2H7NO3S	1	1	2	5	1	0	0.999998	-1	0	-1	-1	-1	-1	0	0	No mother-daughter relation is found for all the precursor formula.
518	Taurine	LC-ESI-ITFT	negative	125.015	C2H7NO3S	1	1	2	4	5	0	0.999998	-1	0	-1	-1	-1	-1	10.2926	0	No mother-daughter relation is found for all the precursor formula.
519	Taurine	LC-ESI-ITFT	negative	125.015	C2H7NO3S	1	1	2	3	2	0	0.999998	-1	0	-1	-1	-1	-1	31.0969	0	No mother-daughter relation is found for all the precursor formula.
520	Taurine	LC-ESI-ITFT	negative	125.015	C2H7NO3S	1	1	2	5	1	0	0.999998	-1	0	-1	-1	-1	-1	0	0	No mother-daughter relation is found for all the precursor formula.
521	Taurine	LC-ESI-ITFT	positive	125.015	C2H7NO3S	1	1	2	6	5	0	0.999998	-1	0	-1	-1	-1	-1	7.43987	0	No mother-daughter relation is found for all the precursor formula.
522	Taurine	LC-ESI-ITFT	positive	125.015	C2H7NO3S	1	1	2	4	3	0	0.999998	-1	0	-1	-1	-1	-1	9.61115	0.0001523	No mother-daughter relation is found for all the precursor formula.
523	Taurine	LC-ESI-ITFT	positive	125.015	C2H7NO3S	1	1	2	6	5	1	2	0	1	0.5	1	1	1	7.79462	0.0001872	successful ranked
524	Taurine	LC-ESI-ITFT	positive	125.015	C2H7NO3S	1	1	2	3	2	0	0.999998	-1	0	-1	-1	-1	-1	8.73175	0	No mother-daughter relation is found for all the precursor formula.
525	Taurine	LC-ESI-ITFT	positive	125.015	C2H7NO3S	1	1	2	4	3	0	0.999998	-1	0	-1	-1	-1	-1	4.22631	0.0001262	No mother-daughter relation is found for all the precursor formula.
526	Taurine	LC-ESI-ITFT	positive	125.015	C2H7NO3S	1	1	2	4	2	0	0.999998	-1	0	-1	-1	-1	-1	12.5794	0.0001309	No mother-daughter relation is found for all the precursor formula.
527	Succinic acid	LC-ESI-ITFT (LTQ Orbitrap XL; Thermo Scientfic)	negative	118.027	C4H6O4	1	1	1	486	15	-1	0.999998	-1	-1	-1	-1	-1	-1	0.750072	-1	Single candidate matches with the answer.
528	Succinic acid	LC-ESI-ITFT (LTQ Orbitrap XL; Thermo Scientfic)	negative	118.027	C4H6O4	1	1	1	6	2	-1	0.999998	-1	-1	-1	-1	-1	-1	0	-1	Single candidate matches with the answer.
529	Succinic acid	LC-ESI-ITFT	negative	118.027	C4H6O4	1	1	1	6	2	-1	0.999998	-1	-1	-1	-1	-1	-1	0	-1	Single candidate matches with the answer.
530	Phosphoenolpyruvic acid	LC-ESI-ITFT (LTQ Orbitrap XL; Thermo Scientfic)	positive	167.982	C3H5O6P	1	1	1	797	30	-1	1	-1	-1	-1	-1	-1	-1	0.460648	-1	Single candidate matches with the answer.
531	Phosphoenolpyruvic acid	LC-ESI-ITFT (LTQ Orbitrap XL; Thermo Scientfic)	positive	167.982	C3H5O6P	1	1	1	10	4	-1	1	-1	-1	-1	-1	-1	-1	8.03197	-1	Single candidate matches with the answer.
532	Phosphoenolpyruvic acid	LC-ESI-ITFT (LTQ Orbitrap XL; Thermo Scientfic)	positive	167.982	C3H5O6P	1	1	1	27	12	-1	1	-1	-1	-1	-1	-1	-1	4.2723	-1	Single candidate matches with the answer.
533	Phosphoenolpyruvic acid	LC-ESI-ITFT (LTQ Orbitrap XL; Thermo Scientfic)	positive	167.982	C3H5O6P	1	1	1	18	3	-1	1	-1	-1	-1	-1	-1	-1	11.4981	-1	Single candidate matches with the answer.
534	Phosphoenolpyruvic acid	LC-ESI-ITFT (LTQ Orbitrap XL; Thermo Scientfic)	positive	167.982	C3H5O6P	1	1	1	276	20	-1	1	-1	-1	-1	-1	-1	-1	1.51238	-1	Single candidate matches with the answer.
535	Phosphoenolpyruvic acid	LC-ESI-ITFT (LTQ Orbitrap XL; Thermo Scientfic)	positive	167.982	C3H5O6P	1	1	1	6	2	-1	1	-1	-1	-1	-1	-1	-1	14.6539	-1	Single candidate matches with the answer.
536	Phosphoenolpyruvic acid	LC-ESI-ITFT (LTQ Orbitrap XL; Thermo Scientfic)	positive	167.982	C3H5O6P	1	1	1	19	4	-1	1	-1	-1	-1	-1	-1	-1	11.4444	-1	Single candidate matches with the answer.
537	Phosphoenolpyruvic acid	LC-ESI-ITFT (LTQ Orbitrap XL; Thermo Scientfic)	negative	167.982	C3H5O6P	1	1	1	731	68	-1	1	-1	-1	-1	-1	-1	-1	0.99753	-1	Single candidate matches with the answer.
538	Phosphoenolpyruvic acid	LC-ESI-ITFT (LTQ Orbitrap XL; Thermo Scientfic)	negative	167.982	C3H5O6P	1	1	1	8	4	-1	1	-1	-1	-1	-1	-1	-1	10.2786	-1	Single candidate matches with the answer.
539	Phosphoenolpyruvic acid	LC-ESI-ITFT (LTQ Orbitrap XL; Thermo Scientfic)	negative	167.982	C3H5O6P	1	1	1	5	1	-1	1	-1	-1	-1	-1	-1	-1	0	-1	Single candidate matches with the answer.
540	Phosphoenolpyruvic acid	LC-ESI-ITFT	negative	167.982	C3H5O6P	1	1	1	8	4	-1	1	-1	-1	-1	-1	-1	-1	10.2786	-1	Single candidate matches with the answer.
541	Phosphoenolpyruvic acid	LC-ESI-ITFT	negative	167.982	C3H5O6P	1	1	1	5	1	-1	1	-1	-1	-1	-1	-1	-1	0	-1	Single candidate matches with the answer.
542	Phosphoenolpyruvic acid	LC-ESI-ITFT	positive	167.982	C3H5O6P	1	1	1	10	3	-1	1	-1	-1	-1	-1	-1	-1	8.03197	-1	Single candidate matches with the answer.
543	Phosphoenolpyruvic acid	LC-ESI-ITFT	positive	167.982	C3H5O6P	1	1	1	6	2	-1	1	-1	-1	-1	-1	-1	-1	14.6539	-1	Single candidate matches with the answer.
544	Sphinganine	LC-ESI-ITFT	negative	301.298	C18H39NO2	1	1	1	20	14	-1	0.999993	-1	-1	-1	-1	-1	-1	5.27365	-1	Single candidate matches with the answer.
545	Uridine	LC-ESI-ITFT (LTQ Orbitrap XL; Thermo Scientfic)	positive	244.07	C9H12N2O6	1	1	2	160	33	4	1.00985	0	1	0.137931	1	1	0.00985222	3.18056	0.0003582	successful ranked
546	Uridine	LC-ESI-ITFT (LTQ Orbitrap XL; Thermo Scientfic)	positive	244.07	C9H12N2O6	1	1	2	8	9	0	0.999996	-1	0	-1	-1	-1	-1	51.0068	0	No mother-daughter relation is found for all the precursor formula.
547	Uridine	LC-ESI-ITFT (LTQ Orbitrap XL; Thermo Scientfic)	positive	244.07	C9H12N2O6	1	1	2	13	6	0	0.999996	-1	0	-1	-1	-1	-1	8.39832	0.0001649	No mother-daughter relation is found for all the precursor formula.
548	Uridine	LC-ESI-ITFT (LTQ Orbitrap XL; Thermo Scientfic)	positive	244.07	C9H12N2O6	1	1	2	3	2	0	0.999996	-1	0	-1	-1	-1	-1	57.9194	0.0001284	No mother-daughter relation is found for all the precursor formula.
549	Uridine	LC-ESI-ITFT (LTQ Orbitrap XL; Thermo Scientfic)	positive	244.07	C9H12N2O6	1	1	2	271	30	4	1.01058	0	1	0.142857	1	1	0.00793651	1.44755	0.0003603	successful ranked
550	Uridine	LC-ESI-ITFT (LTQ Orbitrap XL; Thermo Scientfic)	positive	244.07	C9H12N2O6	1	1	2	14	15	1	2	0	1	0.5	1	1	1	36.829	0.0002483	successful ranked
551	Uridine	LC-ESI-ITFT (LTQ Orbitrap XL; Thermo Scientfic)	positive	244.07	C9H12N2O6	1	1	2	23	8	0	0.999996	-1	0	-1	-1	-1	-1	15.1207	0.0001632	No mother-daughter relation is found for all the precursor formula.
552	Uridine	LC-ESI-ITFT (LTQ Orbitrap XL; Thermo Scientfic)	positive	244.07	C9H12N2O6	1	1	2	9	5	0	0.999996	-1	0	-1	-1	-1	-1	15.5358	0.0001311	No mother-daughter relation is found for all the precursor formula.
553	Uridine	LC-ESI-ITFT (LTQ Orbitrap XL; Thermo Scientfic)	negative	244.07	C9H12N2O6	1	1	2	802	30	11	1.10826	0	1	0.407407	1	1	0.0997151	0.853103	0.0003569	successful ranked
554	Uridine	LC-ESI-ITFT (LTQ Orbitrap XL; Thermo Scientfic)	negative	244.07	C9H12N2O6	1	1	2	19	13	0	0.999996	-1	0	-1	-1	-1	-1	7.32311	0.0002028	No mother-daughter relation is found for all the precursor formula.
555	Uridine	LC-ESI-ITFT (LTQ Orbitrap XL; Thermo Scientfic)	negative	244.07	C9H12N2O6	1	1	2	21	17	1	1.02222	0	1	0.1	1	1	0.0222222	4.61844	0.0002538	successful ranked
556	Uridine	LC-ESI-ITFT (LTQ Orbitrap XL; Thermo Scientfic)	negative	244.07	C9H12N2O6	1	1	2	620	38	7	1.07792	0	1	0.318182	1	1	0.0779221	0.981875	0.0003955	successful ranked
557	Uridine	LC-ESI-ITFT (LTQ Orbitrap XL; Thermo Scientfic)	negative	244.07	C9H12N2O6	1	1	2	10	11	0	0.999996	-1	0	-1	-1	-1	-1	13.3757	0.0001741	No mother-daughter relation is found for all the precursor formula.
558	Uridine	LC-ESI-ITFT (LTQ Orbitrap XL; Thermo Scientfic)	negative	244.07	C9H12N2O6	1	1	2	4	2	0	0.999996	-1	0	-1	-1	-1	-1	0	0	No mother-daughter relation is found for all the precursor formula.
559	Uridine	LC-ESI-ITFT	negative	244.07	C9H12N2O6	1	1	2	43	23	21	1.62771	0	1	0.954545	1	1	0.627706	7.01637	0.0003221	successful ranked
560	Uridine	LC-ESI-ITFT	negative	244.07	C9H12N2O6	1	1	2	19	12	0	0.999996	-1	0	-1	-1	-1	-1	7.32311	0.0001804	No mother-daughter relation is found for all the precursor formula.
561	Uridine	LC-ESI-ITFT	negative	244.07	C9H12N2O6	1	1	2	21	17	1	1.02222	0	1	0.1	1	1	0.0222222	4.61844	0.0002475	successful ranked
562	Uridine	LC-ESI-ITFT	negative	244.07	C9H12N2O6	1	1	2	10	11	0	0.999996	-1	0	-1	-1	-1	-1	13.3757	0.0001621	No mother-daughter relation is found for all the precursor formula.
563	Uridine	LC-ESI-ITFT	negative	244.07	C9H12N2O6	1	1	2	4	2	0	0.999996	-1	0	-1	-1	-1	-1	0	0	No mother-daughter relation is found for all the precursor formula.
564	Uridine	LC-ESI-ITFT	positive	244.07	C9H12N2O6	1	1	2	8	9	0	0.999996	-1	0	-1	-1	-1	-1	51.0068	0	No mother-daughter relation is found for all the precursor formula.
565	Uridine	LC-ESI-ITFT	positive	244.07	C9H12N2O6	1	1	2	13	6	0	0.999996	-1	0	-1	-1	-1	-1	8.39832	0.0001524	No mother-daughter relation is found for all the precursor formula.
566	Uridine	LC-ESI-ITFT	positive	244.07	C9H12N2O6	1	1	2	3	2	0	0.999996	-1	0	-1	-1	-1	-1	57.9194	0.0001319	No mother-daughter relation is found for all the precursor formula.
567	Uridine	LC-ESI-ITFT	positive	244.07	C9H12N2O6	1	1	2	14	15	1	2	0	1	0.5	1	1	1	36.829	0.0002459	successful ranked
568	Uridine	LC-ESI-ITFT	positive	244.07	C9H12N2O6	1	1	2	23	8	0	0.999996	-1	0	-1	-1	-1	-1	15.1207	0.0001605	No mother-daughter relation is found for all the precursor formula.
569	Uridine	LC-ESI-ITFT	positive	244.07	C9H12N2O6	1	1	2	9	5	0	0.999996	-1	0	-1	-1	-1	-1	15.5358	0.0001536	No mother-daughter relation is found for all the precursor formula.
570	Tyramine	LC-ESI-ITFT (LTQ Orbitrap XL; Thermo Scientfic)	positive	137.084	C8H11NO	1	1	1	114	11	-1	0.999998	-1	-1	-1	-1	-1	-1	2.46252	-1	Single candidate matches with the answer.
571	Tyramine	LC-ESI-ITFT (LTQ Orbitrap XL; Thermo Scientfic)	positive	137.084	C8H11NO	1	1	1	6	7	-1	0.999998	-1	-1	-1	-1	-1	-1	12.7388	-1	Single candidate matches with the answer.
572	Tyramine	LC-ESI-ITFT (LTQ Orbitrap XL; Thermo Scientfic)	positive	137.084	C8H11NO	1	1	1	5	5	-1	0.999998	-1	-1	-1	-1	-1	-1	12.6043	-1	Single candidate matches with the answer.
573	Tyramine	LC-ESI-ITFT (LTQ Orbitrap XL; Thermo Scientfic)	positive	137.084	C8H11NO	1	1	1	132	8	-1	0.999998	-1	-1	-1	-1	-1	-1	2.65141	-1	Single candidate matches with the answer.
574	Tyramine	LC-ESI-ITFT (LTQ Orbitrap XL; Thermo Scientfic)	positive	137.084	C8H11NO	1	1	1	10	5	-1	0.999998	-1	-1	-1	-1	-1	-1	8.18014	-1	Single candidate matches with the answer.
575	Tyramine	LC-ESI-ITFT (LTQ Orbitrap XL; Thermo Scientfic)	positive	137.084	C8H11NO	1	1	1	62	5	-1	0.999998	-1	-1	-1	-1	-1	-1	6.1342	-1	Single candidate matches with the answer.
576	Tyramine	LC-ESI-ITFT	positive	137.084	C8H11NO	1	1	1	25	19	-1	0.999998	-1	-1	-1	-1	-1	-1	4.44032	-1	Single candidate matches with the answer.
577	Tyramine	LC-ESI-ITFT	positive	137.084	C8H11NO	1	1	1	20	19	-1	0.999998	-1	-1	-1	-1	-1	-1	5.12965	-1	Single candidate matches with the answer.
578	Tyramine	LC-ESI-ITFT	positive	137.084	C8H11NO	1	1	1	20	20	-1	0.999998	-1	-1	-1	-1	-1	-1	3.48424	-1	Single candidate matches with the answer.
579	Tyramine	LC-ESI-ITFT	positive	137.084	C8H11NO	1	1	1	33	9	-1	0.999998	-1	-1	-1	-1	-1	-1	2.31363	-1	Single candidate matches with the answer.
580	Tyramine	LC-ESI-ITFT	positive	137.084	C8H11NO	1	1	1	6	7	-1	0.999998	-1	-1	-1	-1	-1	-1	12.7388	-1	Single candidate matches with the answer.
581	Tyramine	LC-ESI-ITFT	positive	137.084	C8H11NO	1	1	1	5	5	-1	0.999998	-1	-1	-1	-1	-1	-1	12.6043	-1	Single candidate matches with the answer.
582	Tyramine	LC-ESI-ITFT	positive	137.084	C8H11NO	1	1	1	10	5	-1	0.999998	-1	-1	-1	-1	-1	-1	8.18014	-1	Single candidate matches with the answer.
583	Tyramine	LC-ESI-ITFT	positive	137.084	C8H11NO	1	1	1	62	5	-1	0.999998	-1	-1	-1	-1	-1	-1	6.1342	-1	Single candidate matches with the answer.
584	Citramalic acid	LC-ESI-ITFT	negative	148.037	C5H8O5	1	1	1	6	6	-1	0.999998	-1	-1	-1	-1	-1	-1	10.6117	-1	Single candidate matches with the answer.
585	Adipic acid	LC-ESI-ITFT	negative	146.058	C6H10O4	1	1	1	5	5	-1	0.999998	-1	-1	-1	-1	-1	-1	11.2709	-1	Single candidate matches with the answer.
586	Vanillic acid	LC-ESI-ITFT	negative	168.042	C8H8O4	1	2	2	9	4	3	1.83333	0	0	0.75	1	0	0	9.41298	0.0001832	successful ranked
587	3-Methyl-2-oxovaleric acid	LC-ESI-ITFT	negative	130.063	C6H10O3	1	1	1	5	4	-1	0.999998	-1	-1	-1	-1	-1	-1	12.7464	-1	Single candidate matches with the answer.
588	Allocholic acid	LC-ESI-ITFT	negative	408.288	C24H40O5	1	1	3	24	25	21	1.62	0	1	0.84	1	1	0.373333	9.83549	0.0005077	successful ranked
589	Allocholic acid	LC-ESI-ITFT	negative	408.288	C24H40O5	1	1	3	23	24	21	1.66667	0	1	0.875	1	1	0.373188	10.0176	0.0005021	successful ranked
590	Allocholic acid	LC-ESI-ITFT	negative	408.288	C24H40O5	1	1	3	24	25	21	1.62	0	1	0.84	1	1	0.373333	9.83549	0.0005413	successful ranked
591	Allocholic acid	LC-ESI-ITFT	negative	408.288	C24H40O5	1	1	3	23	24	21	1.66667	0	1	0.875	1	1	0.373188	10.0176	0.0005229	successful ranked
592	Ribitol	LC-ESI-ITFT (LTQ Orbitrap XL; Thermo Scientfic)	positive	152.068	C5H12O5	1	1	2	330	18	2	1.03297	0	1	0.142857	1	1	0.032967	0.974982	0.0003848	successful ranked
593	Ribitol	LC-ESI-ITFT (LTQ Orbitrap XL; Thermo Scientfic)	positive	152.068	C5H12O5	1	1	2	20	16	0	0.999997	-1	0	-1	-1	-1	-1	6.29899	0.0002336	No mother-daughter relation is found for all the precursor formula.
594	Ribitol	LC-ESI-ITFT (LTQ Orbitrap XL; Thermo Scientfic)	positive	152.068	C5H12O5	1	1	2	7	5	0	0.999997	-1	0	-1	-1	-1	-1	8.7141	0.0001368	No mother-daughter relation is found for all the precursor formula.
595	Ribitol	LC-ESI-ITFT (LTQ Orbitrap XL; Thermo Scientfic)	positive	152.068	C5H12O5	1	1	2	34	17	0	0.999997	-1	0	-1	-1	-1	-1	5.40353	0.000228	No mother-daughter relation is found for all the precursor formula.
596	Ribitol	LC-ESI-ITFT (LTQ Orbitrap XL; Thermo Scientfic)	positive	152.068	C5H12O5	1	1	2	425	22	2	1.02857	0	1	0.133333	1	1	0.0285714	0.872522	0.0002652	successful ranked
597	Ribitol	LC-ESI-ITFT (LTQ Orbitrap XL; Thermo Scientfic)	positive	152.068	C5H12O5	1	1	2	15	12	0	0.999997	-1	0	-1	-1	-1	-1	7.88704	0.0001788	No mother-daughter relation is found for all the precursor formula.
598	Ribitol	LC-ESI-ITFT (LTQ Orbitrap XL; Thermo Scientfic)	positive	152.068	C5H12O5	1	1	2	9	5	0	0.999997	-1	0	-1	-1	-1	-1	8.75819	0.000136	No mother-daughter relation is found for all the precursor formula.
599	Ribitol	LC-ESI-ITFT (LTQ Orbitrap XL; Thermo Scientfic)	positive	152.068	C5H12O5	1	1	2	16	14	0	0.999997	-1	0	-1	-1	-1	-1	6.56565	0.0001866	No mother-daughter relation is found for all the precursor formula.
600	Ribitol	LC-ESI-ITFT	positive	152.068	C5H12O5	1	1	2	20	15	0	0.999997	-1	0	-1	-1	-1	-1	6.29899	0.0001827	No mother-daughter relation is found for all the precursor formula.
601	Ribitol	LC-ESI-ITFT	positive	152.068	C5H12O5	1	1	2	7	5	0	0.999997	-1	0	-1	-1	-1	-1	8.7141	0.0001285	No mother-daughter relation is found for all the precursor formula.
602	Ribitol	LC-ESI-ITFT	positive	152.068	C5H12O5	1	1	2	34	16	0	0.999997	-1	0	-1	-1	-1	-1	5.40353	0.0001935	No mother-daughter relation is found for all the precursor formula.
603	Ribitol	LC-ESI-ITFT	positive	152.068	C5H12O5	1	1	2	15	11	0	0.999997	-1	0	-1	-1	-1	-1	7.88704	0.0001573	No mother-daughter relation is found for all the precursor formula.
604	Ribitol	LC-ESI-ITFT	positive	152.068	C5H12O5	1	1	2	9	5	0	0.999997	-1	0	-1	-1	-1	-1	8.75819	0.0001294	No mother-daughter relation is found for all the precursor formula.
605	Ribitol	LC-ESI-ITFT	positive	152.068	C5H12O5	1	1	2	16	14	0	0.999997	-1	0	-1	-1	-1	-1	6.56565	0.0001794	No mother-daughter relation is found for all the precursor formula.
606	Aminoadipic acid	LC-ESI-ITFT	positive	161.069	C6H11NO4	1	1	1	6	5	-1	0.999997	-1	-1	-1	-1	-1	-1	9.68456	-1	Single candidate matches with the answer.
607	L-Arginine	LC-ESI-ITFT (LTQ Orbitrap XL; Thermo Scientfic)	positive	174.112	C6H14N4O2	1	1	1	108	17	-1	0.999996	-1	-1	-1	-1	-1	-1	3.18072	-1	Single candidate matches with the answer.
608	L-Arginine	LC-ESI-ITFT (LTQ Orbitrap XL; Thermo Scientfic)	positive	174.112	C6H14N4O2	1	1	1	8	4	-1	0.999996	-1	-1	-1	-1	-1	-1	9.50904	-1	Single candidate matches with the answer.
609	L-Arginine	LC-ESI-ITFT (LTQ Orbitrap XL; Thermo Scientfic)	positive	174.112	C6H14N4O2	1	1	1	21	17	-1	0.999996	-1	-1	-1	-1	-1	-1	6.97407	-1	Single candidate matches with the answer.
610	L-Arginine	LC-ESI-ITFT (LTQ Orbitrap XL; Thermo Scientfic)	positive	174.112	C6H14N4O2	1	1	1	32	24	-1	0.999996	-1	-1	-1	-1	-1	-1	4.53001	-1	Single candidate matches with the answer.
611	L-Arginine	LC-ESI-ITFT (LTQ Orbitrap XL; Thermo Scientfic)	positive	174.112	C6H14N4O2	1	1	1	180	18	-1	0.999996	-1	-1	-1	-1	-1	-1	4.59389	-1	Single candidate matches with the answer.
612	L-Arginine	LC-ESI-ITFT (LTQ Orbitrap XL; Thermo Scientfic)	positive	174.112	C6H14N4O2	1	1	1	21	17	-1	0.999996	-1	-1	-1	-1	-1	-1	7.32559	-1	Single candidate matches with the answer.
613	L-Arginine	LC-ESI-ITFT (LTQ Orbitrap XL; Thermo Scientfic)	positive	174.112	C6H14N4O2	1	1	1	29	20	-1	0.999996	-1	-1	-1	-1	-1	-1	5.14191	-1	Single candidate matches with the answer.
614	L-Arginine	LC-ESI-ITFT (LTQ Orbitrap XL; Thermo Scientfic)	positive	174.112	C6H14N4O2	1	1	1	5	4	-1	0.999996	-1	-1	-1	-1	-1	-1	11.4845	-1	Single candidate matches with the answer.
615	L-Arginine	LC-ESI-ITFT (LTQ Orbitrap XL; Thermo Scientfic)	negative	174.112	C6H14N4O2	1	1	1	1201	24	-1	0.999996	-1	-1	-1	-1	-1	-1	1.32196	-1	Single candidate matches with the answer.
616	L-Arginine	LC-ESI-ITFT (LTQ Orbitrap XL; Thermo Scientfic)	negative	174.112	C6H14N4O2	1	1	1	8	9	-1	0.999996	-1	-1	-1	-1	-1	-1	8.19174	-1	Single candidate matches with the answer.
[truncated: 1,985 more rows]

## Sheet: HMDB_QFT_result
No	Name	Instrument_Type	Ionization_Mode	Mass	Formula	Rank_Reduced	Original_Rank	Original_Candidates	Peak_Num	Frag_Num	Frag_w_Formula	Score	Is_Reduced	Is_Top1_Uniq	Char_Frag_Percent	Is_CFP_Max	Is_CFP_Max_Uniq	Top2_Sore_Diff	Peak_Dist_SD	Comp_Time	Note
[truncated: 1,439 more rows]

[truncated: 5 more sheets: NPL_MAXIS_result, NPL_QTOF_result, NPL_OT_result, LIPID_OT_result, ident_summary]
